1 **Wnt signaling mediates acquisition of blood-brain barrier properties in naïve endothelium**  
2 **derived from human pluripotent stem cells**

3 Benjamin D. Gastfriend<sup>1</sup>, Hideaki Nishihara<sup>2</sup>, Scott G. Canfield<sup>1†</sup>, Koji L. Foreman<sup>1</sup>, Britta  
4 Engelhardt<sup>2</sup>, Sean P. Palecek<sup>1\*</sup>, and Eric V. Shusta<sup>1,3\*</sup>

5 <sup>1</sup>Department of Chemical and Biological Engineering, University of Wisconsin–Madison,  
6 Madison, WI, USA

7 <sup>2</sup>Theodor Kocher Institute, University of Bern, Bern, Switzerland

8 <sup>3</sup>Department of Neurological Surgery, University of Wisconsin–Madison, Madison, WI, USA

9 †Current affiliation: Department of Cellular and Integrative Physiology, Indiana University  
10 School of Medicine, Terre Haute, IN, USA

11 \*Corresponding authors:

12 Prof. Eric V. Shusta  
13 Department of Chemical and Biological Engineering  
14 Department of Neurological Surgery  
15 University of Wisconsin–Madison  
16 1415 Engineering Drive  
17 Madison, WI 53706  
18 [eshusta@wisc.edu](mailto:eshusta@wisc.edu)  
19 (608) 265-5103

20 Prof. Sean P. Palecek  
21 Department of Chemical and Biological Engineering  
22 University of Wisconsin–Madison  
23 1415 Engineering Drive  
24 Madison, WI 53706  
25 [sppalecek@wisc.edu](mailto:sppalecek@wisc.edu)  
26 (608) 262-8931

27  
28 Running title: Wnt-mediated barrierogenesis in hPSC-endothelium

29 **ABSTRACT**

30 Endothelial cells (ECs) in the central nervous system (CNS) acquire their specialized blood-brain  
31 barrier (BBB) properties in response to extrinsic signals, with Wnt/ $\beta$ -catenin signaling  
32 coordinating multiple aspects of this process. Our knowledge of CNS EC development has been  
33 advanced largely by animal models, and human pluripotent stem cells (hPSCs) offer the  
34 opportunity to examine BBB development in an *in vitro* human system. Here we show that  
35 activation of Wnt signaling in hPSC-derived naïve endothelial progenitors, but not in matured  
36 ECs, leads to robust acquisition of canonical BBB phenotypes including expression of GLUT-1,  
37 increased claudin-5, and decreased PLVAP. RNA-seq revealed a transcriptome profile  
38 resembling ECs with CNS-like characteristics, including Wnt-upregulated expression of *LEF1*,  
39 *APCDD1*, and *ZIC3*. Together, our work defines effects of Wnt activation in naïve ECs and  
40 establishes an improved hPSC-based model for interrogation of CNS barrierogenesis.

41

42 **KEYWORDS**

43 Endothelial cells, blood-brain barrier, barrierogenesis, Wnt signaling

## 44 INTRODUCTION

45 In the central nervous system (CNS), vascular endothelial cells (ECs) are highly  
46 specialized, with complex tight junctions, expression of a spectrum of nutrient and efflux  
47 transporters, low rates of vesicle trafficking, no fenestrae, and low expression of immune cell  
48 adhesion molecules (Reese and Karnovsky, 1967; Obermeier et al., 2013). ECs bearing these  
49 attributes, often referred to as the blood-brain barrier (BBB), work in concert with the other brain  
50 barriers to facilitate the tight regulation of the CNS microenvironment required for proper  
51 neuronal function (Daneman and Engelhardt, 2017; Profaci et al., 2020). During development,  
52 the Wnt/ $\beta$ -catenin signaling pathway drives both CNS angiogenesis, during which vascular  
53 sprouts originating from the perineural vascular plexus invade the developing neural tube, and  
54 the coupled process of barrierogenesis by which resulting ECs begin to acquire BBB properties  
55 (Liebner et al., 2008; Stenman et al., 2008; Daneman et al., 2009; Engelhardt and Liebner, 2014;  
56 Umans et al., 2017). Specifically, neural progenitor-derived Wnt7a and Wnt7b ligands signal  
57 through Frizzled receptors and the obligate co-receptors RECK and GPR124 (ADGRA2) on  
58 endothelial cells (Kuhnert et al., 2010; Cullen et al., 2011; Vanhollebeke et al., 2015; Cho et al.,  
59 2017; Eubelen et al., 2018; Vallon et al., 2018). Other ligands function analogously in the retina  
60 (Norrin) (Ye et al., 2009; Wang et al., 2012) and potentially in the dorsal neural tube (Daneman  
61 et al., 2009). Furthermore, Wnt/ $\beta$ -catenin signaling is required for maintenance of CNS EC  
62 barrier properties in adulthood (Tran et al., 2016), with astrocytes as a major source of Wnt7  
63 ligands (He et al., 2018; Vanlandewijck et al., 2018; Guérit et al., 2021).

64 Molecular hallmarks of Wnt-mediated CNS EC barrierogenesis are (i) acquisition of  
65 glucose transporter GLUT-1 expression, (ii) loss of plasmalemma vesicle-associated protein  
66 (PLVAP), and (iii) upregulation of claudin-5 (Daneman et al., 2009; Kuhnert et al., 2010; Cho et  
67 al., 2017; Umans et al., 2017; Wang et al., 2019). Notably, the Wnt-mediated switch between the

68 “leaky” EC phenotype (GLUT-1<sup>-</sup> PLVAP<sup>+</sup> claudin-5<sup>low</sup>) and the barrier EC phenotype (GLUT-  
69 1<sup>+</sup> PLVAP<sup>-</sup> claudin-5<sup>high</sup>) correlates with reduced permeability to molecular tracers (Wang et al.,  
70 2012; Cho et al., 2017) and is conserved in multiple contexts. For instance, medulloblastomas  
71 that produce Wnt-inhibitory factors have leaky vessels (Phoenix et al., 2016). Moreover,  
72 vasculature perfusing circumventricular organs is leaky due to low levels of Wnt signaling (Benz  
73 et al., 2019; Wang et al., 2019). Notably, ectopic activation of Wnt in ECs of circumventricular  
74 organs induces GLUT-1 and suppresses PLVAP (Benz et al., 2019; Wang et al., 2019).  
75 However, similar ectopic activation of Wnt in liver and lung ECs produces only very minor  
76 barriergenic effects (Munji et al., 2019), and Wnt activation in cultured primary mouse brain ECs  
77 does not prevent culture-induced loss of barrier-associated gene expression (Sabbagh and  
78 Nathans, 2020). The reasons for the apparent context-dependent impacts of Wnt activation in  
79 ECs remain unclear and motivate systematic examination of this process in a simplified model  
80 system. Further, given species differences in brain EC transporter expression (Uchida et al.,  
81 2011), drug permeability (Syvänen et al., 2009), and gene expression (Song et al., 2020), this  
82 process warrants investigation in human cells to complement mouse *in vivo* studies.

83         Prior studies have evaluated the impact of Wnt activation in immortalized human brain  
84 ECs and observed only modest effects on barrier phenotype (Paolinelli et al., 2013; Laksitorini et  
85 al., 2019). Combined with the aforementioned deficits observed in primary adult mouse brain  
86 endothelial cells that are not rescued by ectopic Wnt activation (Sabbagh and Nathans, 2020),  
87 one possibility is that mature, adult endothelium is largely refractory to Wnt activation, and that  
88 Wnt responsiveness is a property of immature endothelial cells analogous to those in the  
89 perineural vascular plexus. Human pluripotent stem cells (hPSCs) offer a potential human model  
90 system for investigation of molecular mechanisms of BBB phenotype acquisition. However,  
91 currently available hPSC-based models of CNS endothelial-like cells are not well suited for

92 modeling the BBB developmental progression as they do not follow a developmentally-relevant  
93 differentiation trajectory, lack definitive endothelial identity, or have been incompletely  
94 characterized with respect to the role of developmental signaling pathways (Lippmann et al.,  
95 2020; Workman and Svendsen, 2020). As a potential alternative, hPSCs can also be used to  
96 generate immature, naïve endothelial progenitors (Lian et al., 2014) that could be used to better  
97 explore the induction of BBB phenotypes. For example, we recently reported that extended  
98 culture of such hPSC-derived endothelial progenitors in a minimal medium yielded ECs with  
99 improved BBB tight junction protein expression and localization which led to improved  
100 paracellular barrier properties (Nishihara et al., 2020). However, as shown below, these cells  
101 exhibit high expression of PLVAP and little expression of GLUT-1, indicating the need for  
102 additional cues to drive CNS EC specification.

103         In this work, we tested the hypothesis that activation of Wnt/ $\beta$ -catenin signaling in hPSC-  
104 derived, naïve endothelial progenitors would drive development of a CNS EC-like phenotype.  
105 We found that many aspects of the CNS EC phenotype, including the canonical GLUT-1,  
106 claudin-5, and PLVAP expression effects, were regulated by CHIR 99021, a small molecule  
107 agonist of Wnt/ $\beta$ -catenin signaling. Wnt ligands and conditioned media from neural progenitors  
108 produced a more limited response, as did CHIR treatment in matured ECs. Whole-transcriptome  
109 analysis revealed definitive endothelial identity of the resulting cells and CHIR-upregulated  
110 expression of known CNS EC transcripts, including *LEF1*, *APCDD1*, *AXIN2*, *SLC2A1*, *CLDN5*,  
111 *LSR*, *ABCG2*, *SOX7*, and *ZIC3*. We also observed an unexpected CHIR-mediated upregulation of  
112 caveolin-1, which did not, however, correlate with increased uptake of a dextran tracer. Thus, we  
113 provide evidence that Wnt activation in hPSC-derived naïve endothelial progenitors is sufficient  
114 to induce many aspects of the CNS barrier EC phenotype, and we establish a model system for  
115 further systematic investigation of putative barrierogenic cues.

## 116 **RESULTS**

### 117 **Wnt activation in hPSC-derived endothelial progenitors**

118 We adapted an existing protocol to produce endothelial progenitor cells (EPCs) from  
119 hPSCs (Lian et al., 2014; Bao et al., 2016) (Figure 1A). To achieve mesoderm specification, this  
120 method employs an initial activation of Wnt/ $\beta$ -catenin signaling with CHIR 99021 (CHIR), a  
121 small molecule inhibitor of glycogen synthase kinase-3 (GSK-3), which results in inhibition of  
122 GSK-3 $\beta$ -mediated  $\beta$ -catenin degradation. After 5 days of expansion, the resulting cultures  
123 contained a mixed population of CD34<sup>+</sup>CD31<sup>+</sup> EPCs and CD34<sup>-</sup>CD31<sup>-</sup> non-EPCs (Figure 1B-  
124 C). We used magnetic-activated cell sorting (MACS) to isolate CD31<sup>+</sup> cells from this mixed  
125 culture and plated these cells on collagen IV-coated plates in a minimal endothelial cell medium  
126 termed hECSR (Nishihara et al., 2020). We first asked whether Wnt3a, a ligand widely used to  
127 activate canonical Wnt/ $\beta$ -catenin signaling (Kim et al., 2005, 2008; Liebner et al., 2008;  
128 Cecchelli et al., 2014; Praça et al., 2019), could induce GLUT-1 expression in the resulting ECs.  
129 After 6 days of treatment, we observed a significant increase in the fraction of GLUT-1<sup>+</sup> ECs in  
130 Wnt3a-treated cultures compared to controls (Figure 1D-E). Consistent with previous  
131 observations (Nishihara et al., 2020), we also detected a population of calponin<sup>+</sup> smooth muscle  
132 protein 22- $\alpha$ <sup>+</sup> putative smooth muscle-like cells (SMLCs) outside the endothelial colonies  
133 (Figure 1–figure supplement 1) and these SMLCs expressed GLUT-1 in both control and Wnt3a-  
134 treated conditions (Figure 1D).

135 Based on these promising results with Wnt3a, we next tested several additional strategies  
136 for Wnt activation and, in addition to GLUT-1, evaluated expression of two other key proteins:  
137 claudin-5, which is known to be upregulated in CNS ECs in response to Wnt (Benz et al., 2019),  
138 and caveolin-1, given the low rate of caveolin-mediated transcytosis in CNS compared to non-  
139 CNS ECs (Reese and Karnovsky, 1967; Andreone et al., 2017). First, we tested Wnt7a and

140 Wnt7b, the ligands primarily responsible for Wnt activation in CNS ECs *in vivo* (Daneman et al.,  
141 2009; Cho et al., 2017). We also tested Wnt ligands in combination with R-spondin 1 (Rspo1), a  
142 potentiator of Wnt signaling that inhibits the RNF43/ZNRF3-mediated negative feedback  
143 mechanism by which Frizzled receptors are endocytosed (Kim et al., 2005, 2008; Koo et al.,  
144 2012; Clevers et al., 2014). Finally, we tested a low concentration (4  $\mu$ M) of the GSK-3 inhibitor  
145 CHIR because of its ability to activate Wnt signaling in a receptor/co-receptor-independent  
146 manner. We found that Wnt7a and the combination of Wnt7a and Wnt7b, but not Wnt7b alone,  
147 slightly increased the fraction of GLUT-1<sup>+</sup> ECs, while Rspo1 did not affect EC purity or  
148 expression of GLUT-1, claudin-5 or caveolin-1 (Figure 2A-C). Interestingly, Wnt7a, but not  
149 Wnt3a, also increased the proportion of ECs compared to SMLCs (Figure 2A,C). By contrast, 4  
150  $\mu$ M CHIR robustly induced GLUT-1 expression in approximately 90% of ECs while increasing  
151 EC purity to a level similar to that achieved with Wnt7a. Furthermore, CHIR led to an  
152 approximately 1.5-fold increase in average claudin-5 abundance and a nearly 30-fold increase in  
153 GLUT-1 abundance, but also a 4-fold increase in caveolin-1 (Figure 2A,C). We therefore titrated  
154 CHIR to determine an optimal concentration for EC expansion, purity, GLUT-1 induction, and  
155 claudin-5 upregulation while limiting the undesirable non-CNS-like increase in caveolin-1  
156 abundance. Although 2  $\mu$ M CHIR did not lead to increased caveolin-1 expression compared to  
157 vehicle control (DMSO), it also did not elevate claudin-5 or GLUT-1 expression compared to  
158 control and was less effective in increasing EC number and EC purity than 4  $\mu$ M CHIR (Figure  
159 2–figure supplement 1). On the other hand, 6  $\mu$ M CHIR further increased GLUT-1 abundance  
160 but also further increased caveolin-1 abundance and did not improve EC number, EC purity, or  
161 claudin-5 expression (Figure 2–figure supplement 1). Therefore, we conducted further  
162 experiments using 4  $\mu$ M CHIR. We confirmed that the CHIR-mediated increases in EC purity,  
163 EC number, and caveolin-1 and GLUT-1 expression were conserved in an additional hPSC line,

164 although claudin-5 upregulation was not apparent (Figure 2–figure supplement 2). We also used  
165 two hPSC lines with doxycycline-inducible expression of short hairpin RNAs targeting *CTNNB1*  
166 ( $\beta$ -catenin) to confirm that CHIR-mediated upregulation of GLUT-1 in ECs was  $\beta$ -catenin-  
167 dependent. Indeed, doxycycline treatment in combination with CHIR significantly reduced  
168 GLUT-1 abundance in ECs derived from these hPSC lines (Figure 2–figure supplement 3).  
169 Together, these results suggest that Wnt pathway activation, either with ligands or CHIR, is  
170 capable of inducing CNS-like phenotypes in hPSC-derived endothelial progenitors.

171 In the CNS, neural progenitors and astrocytes are the primary sources of Wnt ligands  
172 resulting in induction and maintenance of EC barrier properties. Because the relatively weak  
173 response to Wnt ligands observed in our system is potentially attributable to poor potency  
174 associated with the recombinant proteins, we reasoned that relevant cellular sources of Wnt  
175 ligands might be more effective in activating Wnt in EPCs. To this end, we differentiated hPSCs  
176 to neural rosettes, which are radially organized Pax6<sup>+</sup> neural progenitors, and astrocytes  
177 according to established protocols (Ebert et al., 2013; Lippmann et al., 2014; Sareen et al., 2014;  
178 Canfield et al., 2017). Importantly, RNA-seq data from the literature suggest that both hPSC-  
179 derived neural rosettes and astrocytes express *WNT7A* (Vatine et al., 2016; Shang et al., 2018).  
180 We collected neural rosette-conditioned medium (NR-CM) and astrocyte-conditioned medium  
181 (Astro-CM) and treated EPCs with these media for 6 days. Similar to our observations with  
182 Wnt7a, both NR-CM and Astro-CM significantly increased the proportion of ECs compared to  
183 SMLCs (Figure 3A,C). NR-CM, but not Astro-CM, also induced weak GLUT-1 expression in  
184 ECs, reminiscent of the Wnt7a-induced phenotype, although this induction was much weaker  
185 than in the CHIR-treated cells (Figure 3B,D). NR-CM and Astro-CM had variable effects with  
186 respect to caveolin-1 and claudin-5 expression (Figure 3D). In summary, NR-CM performed  
187 similarly to Wnt7a in weakly inducing GLUT-1 expression and increasing EC purity. The



188 comparatively stronger response to CHIR may suggest either that the potency or concentration of  
189 ligands is insufficient, or that the EPCs lack the full machinery of receptors and co-receptors  
190 necessary to transduce the Wnt ligand signal (analyzed further below).

191

## 192 **Effects of CHIR-mediated Wnt activation in endothelial progenitors**

193 Since CHIR elicited the most robust Wnt-mediated response, we next asked whether  
194 other aspects of the CNS EC barrier phenotype were CHIR-regulated. PLVAP, a protein that  
195 forms bridges across both caveolae and fenestrae (Herrnberger et al., 2012), is one such  
196 canonically Wnt-downregulated protein. We therefore first evaluated PLVAP expression in  
197 Passage 1 control (DMSO) or CHIR-treated ECs using confocal microscopy (Figure 4A). We  
198 observed numerous PLVAP<sup>+</sup> punctate vesicle-like structures in both conditions, with CHIR  
199 treatment reducing PLVAP abundance by approximately 20% (Figure 4A-B). This effect was not  
200 apparent in Western blots of Passage 1 ECs, likely due to the relatively modest effect (Figure  
201 5A-B). However, after two more passages (Figure 1A), Passage 3 ECs demonstrated a robust  
202 downregulation of PLVAP in CHIR-treated cells compared to controls (Figure 5C-D). We also  
203 used Western blotting to confirm CHIR-mediated upregulation of GLUT-1 and claudin-5 both at  
204 Passage 1 and Passage 3 (Figure 5A-D). We next evaluated expression of the tricellular tight  
205 junction protein LSR (angulin-1) because of its enrichment in CNS versus non-CNS ECs, and  
206 the temporal similarity between LSR induction and the early stage of Wnt-mediated CNS  
207 barriergenesis (Sohet et al., 2015). We found that CHIR treatment led to a strong increase in LSR  
208 expression in both Passage 1 and Passage 3 ECs (Figure 5A-D), suggesting that Wnt signaling  
209 upregulates multiple necessary components of the CNS EC bicellular and tricellular junctions.

210 CHIR treatment produced two apparently competing changes in ECs related to vesicular  
211 transport: an expected downregulation of PLVAP and an unexpected upregulation of caveolin-1.

212 We therefore asked whether the rate of total fluid-phase endocytosis differed between CHIR-  
213 treated and control ECs, using a fluorescently-labeled 10 kDa dextran as a tracer. After  
214 incubating Passage 1 cultures with dextran for 2 h at 37°C, we used flow cytometry to gate  
215 CD31<sup>+</sup> ECs and assess total dextran accumulation (Figure 6A-B). We first confirmed that the  
216 process of dextran internalization required the membrane fluidity of an endocytosis-dependent  
217 process by carrying out the assay at 4°C; this condition indeed yielded a substantially decreased  
218 dextran signal compared to 37°C (Figure 6B). In ECs incubated at 37°C, CHIR treatment did not  
219 change the geometric mean dextran signal compared to DMSO (Figure 6B,C), but did cause a  
220 broadening of the distribution of dextran intensities, indicative of sub-populations of cells with  
221 decreased and increased dextran uptake (Figure 6B,D). Importantly, these results were consistent  
222 across three independent differentiations (Figure 6C-D). Thus, despite the generally uniform  
223 elevation of caveolin-1 and decrease of PLVAP observed by immunocytochemistry in CHIR-  
224 treated ECs, our functional assay suggests neither an overall increase nor decrease in total fluid-  
225 phase endocytosis. Instead, it indicates that CHIR increases the heterogeneity of the EC  
226 population with respect to the rate of endocytosis.

227         Given the relatively weak responses to Wnt activation in adult mouse liver ECs *in vivo*  
228 (Munji et al., 2019) and adult mouse brain ECs cultured *in vitro* (Sabbagh and Nathans, 2020),  
229 we sought to determine whether the immature, potentially more plastic state of hPSC-derived  
230 endothelial progenitors contributed to the relatively robust CHIR-mediated response we  
231 observed. To test this hypothesis, we matured hPSC-derived ECs *in vitro* for 4 passages (until  
232 approximately day 30) prior to initiating CHIR treatment for 6 days (Figure 7A). The resulting  
233 Passage 5 DMSO-treated ECs, which are analogous to EECM-BMEC-like cells we previously  
234 reported (Nishihara et al., 2020), did not have detectable GLUT-1 expression (Figure 7B).  
235 Compared to DMSO controls, the resulting CHIR-treated Passage 5 ECs exhibited an

236 approximately 1.5-fold increase in GLUT-1 abundance (Figure 7B-C), a markedly weaker  
237 response than the 10- to 40-fold increases routinely observed using the same  
238 immunocytochemistry-based assay when CHIR treatment was initiated immediately after MACS  
239 (Figure 2; Figure 2–figure supplement 1; Figure 2–figure supplement 2; Figure 3). Furthermore,  
240 CHIR treatment in matured ECs led to a slight decrease in EC number (Figure 7D), rather than  
241 the increase observed when treatment was initiated immediately after MACS (Figure 2–figure  
242 supplement 1; Figure 3). Together, these data suggest that early, naïve endothelial progenitors  
243 are more responsive to Wnt activation than more mature ECs derived by the same differentiation  
244 protocol.

245

#### 246 **Comprehensive profiling of the Wnt-regulated endothelial transcriptome**

247 We turned next to RNA-sequencing as an unbiased method to assess the impacts of Wnt  
248 activation on the EC transcriptome. We performed four independent differentiations and  
249 analyzed Passage 1 ECs treated with DMSO, CHIR, or Wnt7a and Wnt7b (Wnt7a/b), using  
250 fluorescence-activated cell sorting (FACS) to isolate CD31<sup>+</sup> ECs from the mixed EC/SMLC  
251 cultures. We also sequenced the SMLCs from DMSO-treated cultures at Passage 1 from two of  
252 these differentiations. DMSO- and CHIR-treated ECs at Passage 3 from three of these  
253 differentiations were also sequenced. Principal component analysis of the resulting whole-  
254 transcriptome profiles revealed that the two cell types (ECs and SMLCs) segregated along  
255 principal component (PC) 1, which explained 52% of the variance. In ECs, the effects of passage  
256 number and treatment were reflected in PC 2, which explained 20% of the variance (Figure 8A).  
257 We next validated the endothelial identity of our cells; we observed that canonical endothelial  
258 marker genes (including *CDH5*, *CD34*, *PECAMI1*, *CLDN5*, *ERG*, and *FLII*) were enriched in  
259 ECs compared to SMLCs and had high absolute abundance, on the order of 100–1,000

260 transcripts per million (TPM) (Figure 8B; Supplementary file 1). SMLCs expressed  
261 mesenchymal (mural/fibroblast)-related transcripts (including *PDGFRB*, *CSPG4*, *PDGFRA*,  
262 *TBX2*, *CNN1*, and *COL1A1*), which ECs generally lacked, although we did observe slight  
263 enrichment of some of these genes in Passage 1 DMSO-treated ECs, likely reflective of a small  
264 amount of SMLC contamination despite CD31 FACS (Figure 8B). SMLCs also expressed  
265 *SLC2A1* (Supplementary file 1) consistent with protein-level observations (Figure 1D). We also  
266 observed little to no expression of the epithelial genes *CDH1*, *EPCAM*, *CLDN1*, *CLDN3* (Castro  
267 Dias et al., 2019), *CLDN4*, and *CLDN6*, reflecting the definitive endothelial nature of the cells  
268 (Figure 8B; Supplementary file 1).

269 First comparing CHIR- and DMSO-treated ECs at Passage 1, we identified 1,369  
270 significantly upregulated genes and 2,037 significantly downregulated genes (Figure 8C;  
271 Supplementary file 2). CHIR-upregulated genes included *SLC2A1*, *CLDN5*, *LSR*, and *CAVI*,  
272 consistent with protein-level assays. *PLVAP* was downregulated, as were a number of  
273 mesenchymal genes (*TAGLN*, *COL1A1*), again reflective of slight contamination of SMLC  
274 transcripts in the DMSO-treated EC samples (Figure 8C-D). Additionally, important downstream  
275 effectors of Wnt signaling were upregulated, including the transcription factors *LEF1* and *TCF7* ,  
276 the negative regulator *AXIN2*, and the negative regulator *APCDD1*, which is known to modulate  
277 Wnt-regulated barrierogenesis in retinal endothelium (Mazzoni et al., 2017) (Figure 8C-D). We  
278 also found that the transcription factors *ZIC3*, which is highly enriched in brain and retinal ECs  
279 *in vivo* and downstream of Frizzled4 signaling (Wang et al., 2012; Sabbagh et al., 2018), and  
280 *SOX7*, which acts cooperatively with *SOX17* and *SOX18* in retinal angiogenesis (Zhou et al.,  
281 2015), were upregulated by CHIR in our system (Figure 8D). Additional CHIR-upregulated  
282 genes included *ABCG2* (encoding the efflux transporter Breast Cancer Resistance Protein,  
283 BCRP), and *APLN*, a tip cell marker enriched in postnatal day 7 murine brain ECs compared to

284 those of other organs, and subsequently downregulated in adulthood (Sabbagh et al., 2018;  
285 Sabbagh and Nathans, 2020) (Figure 8C). Finally, we detected CHIR-mediated downregulation  
286 of the fatty acid-binding protein-encoding *FABP4*, which is depleted in brain ECs compared to  
287 those of peripheral organs (Sabbagh et al., 2018). We also observed similar downregulation of  
288 *SMAD6*, which is depleted in brain ECs compared to lung ECs and is a putative negative  
289 regulator of BMP-mediated angiogenesis (Mouillesseaux et al., 2016; Vanlandewijck et al.,  
290 2018) (Figure 8D). Many of these CHIR-mediated gene expression changes persisted at Passage  
291 3, including *SLC2A1*, *LSR*, *LEF1*, *AXIN2*, *APCDD1*, *ZIC3*, and *ABCG2* upregulation and *PLVAP*  
292 downregulation (Figure 8E; Figure 8–figure supplement 1A).

293 We made similar comparisons (i) between Wnt7a/b-treated and control (DMSO-treated)  
294 ECs at Passage 1, and (ii) between control ECs at Passage 3 versus Passage 1 (Figure 8E; Figure  
295 8–figure supplement 1B-C; Supplementary file 2). Consistent with the weak response observed  
296 by immunocytochemistry, there were fewer Wnt7a/b-mediated gene expression changes  
297 compared to those elicited by CHIR, with 241 upregulated and 420 downregulated genes (Figure  
298 8–figure supplement 1B). In general, however, these changes were consistent with CHIR-  
299 mediated changes, with 104 concordantly upregulated genes, 302 concordantly downregulated  
300 genes, and only 23 discordantly regulated genes (Figure 8E). Of note, treatment with Wnt7a/b,  
301 but not CHIR, upregulated *SOX17*, a Wnt target gene required for BBB function (Corada et al.,  
302 2018). Extended culture to Passage 3 in the absence of exogenous Wnt activation led to 1,521  
303 upregulated genes, including *CLDN5* and *CAVI*, consistent with previously-reported protein-  
304 level observations in EECM-BMEC-like cells (Nishihara et al., 2020), which are analogous to  
305 Passage 3 DMSO-treated cells. We also observed 1,625 downregulated genes, including *PLVAP*  
306 (Figure 8–figure supplement 1C). *SLC2A1*, however, was not upregulated at Passage 3 (Figure  
307 8–figure supplement 1C), concordant with absence of GLUT-1 protein expression in the control

308 ECs (Figure 7B). To further understand the strengths and limitations of this model system both  
309 as a readout of early developmental changes in CNS ECs (Passage 1 cells) or as a source of  
310 CNS-like ECs for use in downstream modeling applications, we evaluated absolute transcript  
311 abundance and effects of treatment or passage number on 53 characteristic CNS EC genes  
312 encompassing tight junction components, vesicle trafficking machinery, solute carriers, and  
313 ATP-binding cassette (ABC) efflux transporters selected based on high expression in human  
314 brain endothelial cells from a meta-analysis of single cell RNA-seq data (Gastfriend et al., 2021)  
315 (Figure 8–figure supplement 1D). While ECs expressed *CLDN5*, *TJP1*, *TJP2*, *OLCN*, and *LSR*,  
316 they lacked *MARVELD2* (encoding tricellulin) under all conditions. ECs under all conditions  
317 also lacked *MFSD2A* and, despite CHIR-mediated downregulation of *PLVAP*, retained high  
318 absolute expression of this and other caveolae-associated genes. Finally, while many solute  
319 carriers and ABC transporters were expressed (*SLC2A1*, *SLC3A2*, *SLC16A1*, *SLC38A2*, *ABCG2*),  
320 others expressed at the *in vivo* human BBB were not (*SLC5A3*, *SLC7A11*, *SLC38A3*, *SLCO1A2*,  
321 *ABCB1*) (Figure 8–figure supplement 1D). Thus, while CHIR treatment yields ECs with certain  
322 elements of CNS-like character, additional molecular signals are likely necessary to improve  
323 other aspects of the *in vivo* CNS EC phenotype.

324 To partially address the hypothesis that the weak response of ECs to Wnt7a/b, NR-CM,  
325 and Astro-CM is due to a lack of necessary Wnt receptors and/or co-receptors, we used RNA-seq  
326 data from Passage 1 DMSO-treated ECs to evaluate expression of transcripts encoding these and  
327 other components of the canonical Wnt signaling pathway. *FZD4* and *FZD6* were highly  
328 expressed and enriched compared to all other Frizzleds (Figure 8–figure supplement 2),  
329 consistent with data from murine brain ECs *in vivo* (Daneman et al., 2009). *RECK* and *ADGRA2*  
330 (*GPR124*) were moderately expressed at a level similar to *LRP6* (on the order of 40 TPM), while  
331 little to no *LRP5* was expressed (Figure 8–figure supplement 2). Taken together, however, these

332 data suggest that the hPSC-derived ECs express much of the machinery necessary to transduce  
333 the signal from Wnt7a/b ligands, but possibilities remain that the proteins encoded by the  
334 evaluated transcripts are absent, or at too low an abundance, for a robust response, motivating the  
335 use of CHIR to bypass the cell surface Wnt pathway components for robust induction of  
336 barrierogenesis via  $\beta$ -catenin stabilization.

337

### 338 **The Wnt-regulated endothelial transcriptome in multiple contexts**

339 To globally assess whether CHIR-mediated gene expression changes in our system are  
340 characteristic of the responses observed in ECs *in vivo* and similar to those observed in other *in*  
341 *vitro* contexts, we compared our RNA-seq dataset to those of studies that employed a genetic  
342 strategy for  $\beta$ -catenin stabilization (the *Ctnnb1*<sup>flex3</sup> allele) in adult mouse ECs in several contexts:  
343 (i) pituitary ECs, which acquire some BBB-like properties upon  $\beta$ -catenin stabilization (Wang et  
344 al., 2019); (ii) liver ECs, which exhibit little to no barrierogenic response to  $\beta$ -catenin stabilization  
345 (Munji et al., 2019); (iii) brain ECs briefly cultured *in vitro*, which rapidly lose their BBB-  
346 specific gene expression profile even with  $\beta$ -catenin stabilization (Sabbagh and Nathans, 2020),  
347 and offer the most direct comparison to our *in vitro* model system. Upon recombination, the  
348 *Ctnnb1*<sup>flex3</sup> allele produces a dominant mutant  $\beta$ -catenin lacking residues that are phosphorylated  
349 by GSK-3 $\beta$  to target  $\beta$ -catenin for degradation (Harada et al., 1999); as such, this strategy for  
350 ligand- and receptor-independent Wnt activation by  $\beta$ -catenin stabilization is directly analogous  
351 to CHIR treatment.

352 We first used literature RNA-seq data from postnatal day 7 murine brain, liver, lung, and  
353 kidney ECs (Sabbagh et al., 2018) to define core sets of genes in brain ECs that are differentially  
354 expressed compared to all three of the other organs (Figure 9A-B). Using the resulting sets of  
355 1094 brain-enriched and 506 brain-depleted genes, we asked how many genes in our Passage 1

356 ECs were concordantly-regulated by CHIR: 130 of the brain-enriched genes were CHIR-  
357 upregulated and 116 of the brain-depleted genes were CHIR-downregulated (Figure 9C). In  
358 pituitary ECs with  $\beta$ -catenin stabilization, 102 of the brain enriched genes were upregulated with  
359 and 48 of the brain depleted genes were downregulated (Figure 9D). Compared with the pituitary  
360 ECs, there were far fewer concordantly-regulated genes in liver ECs with  $\beta$ -catenin stabilization,  
361 with 25 upregulated and 1 downregulated (Figure 9E). Finally, cultured primary mouse brain  
362 ECs with  $\beta$ -catenin stabilization exhibited 72 upregulated and 16 downregulated genes (Figure  
363 9F). The only gene concordantly-regulated in all four comparisons was the canonical Wnt target  
364 *AXIN2*. Several additional genes were concordantly upregulated in three of four, including  
365 *TCF7*, *FAM107A*, *NKD1*, *TNFRSF19*, *GLUL*, *SLC30A1*, and *ABCBI*, which was the only gene  
366 concordantly regulated in all comparisons except the hPSC-derived ECs (Figure 9G). Several  
367 canonical target genes were shared by the hPSC-derived EC and pituitary EC systems, including  
368 *APCDD1*, *LEF1*, *CLDN5*, and *SLC2A1*; also in this category were *LSR*, the zinc/manganese  
369 transporter *SLC39A8*, and 12 additional genes (Figure 9G). Notably, the caveolae inhibitor  
370 *MFSD2A* was robustly upregulated by  $\beta$ -catenin in pituitary ECs, but not in any other context  
371 (Figure 9C-F), suggesting other brain-derived factors may cooperate with Wnt to regulate  
372 expression of this important inhibitor of caveolin-mediated transcytosis. Complete gene lists  
373 from this comparative analysis are provided in Supplementary file 3. In sum, the data suggest  
374 that the hPSC-derived ECs responded to Wnt activation in a fashion that led to modest induction  
375 of CNS transcriptional programs and that the response was most similar to the pituitary  $\beta$ -catenin  
376 stabilization model. Importantly, this analysis also supports the hypothesis that immature  
377 endothelium is highly responsive to Wnt activation where mature (adult) endothelium is largely  
378 refractory except in regions proximal to barrier-forming regions.



379 **DISCUSSION**

380           The Wnt/ $\beta$ -catenin signaling pathway plays a central role in CNS angiogenesis and in  
381 establishing the unique properties of CNS ECs (Liebner et al., 2008; Stenman et al., 2008;  
382 Daneman et al., 2009; Kuhnert et al., 2010; Cullen et al., 2011; Vanhollebeke et al., 2015; Cho et  
383 al., 2017). In this work, we investigated the role of Wnt/ $\beta$ -catenin signaling on induction of BBB  
384 properties in a human EC model, using naïve endothelial progenitors derived from hPSCs. We  
385 reasoned that these immature EPCs (Lian et al., 2014) would be similar to the immature  
386 endothelium in the perineural vascular plexus and thus competent to acquire CNS EC  
387 phenotypes in response to Wnt activation. We evaluated several strategies to activate Wnt,  
388 including the widely used ligand Wnt3a (Liebner et al., 2008), the neural progenitor- and  
389 astrocyte-derived ligands Wnt7a and Wnt7b, which are the two Wnt ligands primarily  
390 responsible for the Wnt-dependent effects of CNS angiogenesis and barrierogenesis observed *in*  
391 *vivo* (Daneman et al., 2009; Cho et al., 2017), neural rosette- and astrocyte-CM as putative  
392 cellular sources of Wnt ligands, and the GSK-3 inhibitor CHIR.

393           We found that CHIR treatment robustly induced several canonical CNS EC molecular  
394 phenotypes, including a marked induction of GLUT-1, upregulation of claudin-5, and  
395 downregulation of PLVAP, which correlated with differential gene expression in RNA-seq data.  
396 Further, using RNA-seq and Western blotting, we also identified LSR (angulin-1) as CHIR-  
397 induced in this system, supporting the notion that this highly CNS EC-enriched tricellular tight  
398 junction protein (Daneman et al., 2010a; Sohet et al., 2015) is Wnt-regulated. In RNA-seq data,  
399 we observed differential expression of known CNS EC-enriched/depleted and Wnt-regulated  
400 genes including upregulated *LEF1*, *AXIN2*, *APCDD1*, *ABCG2*, *SOX7*, and *ZIC3* and  
401 downregulated *PLVAP*, *FABP4*, and *SMAD6*. These RNA-seq data should therefore be useful in  
402 generating hypotheses of BBB-associated genes regulated by Wnt activation in ECs, for future

403 functional studies. Our work also defines an important set of phenotypes for which Wnt  
404 activation in ECs is not sufficient in our system: in the context of vesicle trafficking, we  
405 observed caveolin-1 (*CAVI*) upregulation, no change in mean functional endocytosis, virtually  
406 no expression of *MFSD2A*, and high absolute *PLVAP* abundance despite CHIR-mediated  
407 downregulation. Given roles of brain pericytes in regulating PLVAP, MFSD2A, and functional  
408 transcytosis (Armulik et al., 2010; Daneman et al., 2010b; Ben-Zvi et al., 2014; Stebbins et al.,  
409 2019), and the observation that MFSD2A is Wnt-regulated in pituitary ECs *in vivo* (Wang et al.,  
410 2019), where pericytes are present, it is plausible that pericyte-derived cues are necessary in  
411 addition to Wnts to achieve the characteristically low rate of CNS EC pinocytosis. Next, while  
412 *ABCG2* (BCRP) was Wnt-induced in our system, other hallmark efflux transporters were not  
413 Wnt-regulated and either expressed at low levels (e.g., *ABCC4*, encoding MRP-4) or not  
414 expressed (e.g. *ABCBI*, encoding P-glycoprotein). Notably however, *Abcb1a* was Wnt-regulated  
415 in the three other  $\beta$ -catenin stabilization experiments from the literature that we evaluated (Munji  
416 et al., 2019; Wang et al., 2019; Sabbagh and Nathans, 2020). Thus, pericyte-derived cues,  
417 astrocyte-derived cues, and/or activation of the pregnane X or other nuclear receptors may be  
418 important for complete acquisition of the complement of CNS EC efflux transporters (Bauer et  
419 al., 2004; Berezowski et al., 2004; Praça et al., 2019).

420 While several recombinant Wnt ligands and neural rosette-CM elevated GLUT-1  
421 expression in ECs, the magnitude of this effect was small compared to the robust induction of  
422 GLUT-1 observed with CHIR treatment. While we observed moderate transcript-level  
423 expression *RECK* and *ADGRA2* (*GPR124*) in Passage 1 ECs, it is possible that protein-level  
424 expression of these necessary Wnt7 coreceptors, or additional components necessary for Wnt  
425 signal transduction, are not of sufficient abundance. For example, absence of LRP5 is a potential  
426 factor in the muted response to Wnt ligands and CM because LRP5 and LRP6 likely have non-

427 redundant functions, as evidenced by defects in retinal barrier formation in *Lrp5*-knockout mice  
428 (Zhou et al., 2014). Presence of GPR124 in naïve endothelial progenitors is consistent with  
429 ubiquitous expression in ECs in the mouse embryo that is subsequently downregulated in non-  
430 CNS endothelium; however, GPR124 enrichment in CNS ECs can be observed as early as E12.5  
431 (Kuhnert et al., 2010), leaving open the possibility that during development other neural tissue-  
432 derived signals upregulate or maintain RECK and GPR124 expression. Furthermore, while  
433 ligand potency or concentration may also play a role in the weak response, we observed a  
434 consistent and highly potent EC-purifying effect (i.e., reduction or elimination of the  
435 contaminating SMLCs observed in control Passage 1 cultures) with *Wnt7a* and both neural  
436 rosette- and astrocyte-CM. CHIR also achieved this purifying effect and increased EC number,  
437 suggesting that Wnt signaling plays a role in suppressing proliferation of mesoderm-derived  
438 mural cells in this system.

439 We also directly addressed the hypothesis that immature ECs are more plastic, that is,  
440 more competent to acquire BBB properties upon Wnt activation, than mature ECs. This  
441 hypothesis is supported by existing observations that ectopic expression of *Wnt7a* is sufficient to  
442 induce GLUT-1 expression in non-CNS regions of the mouse embryo (Stenman et al., 2008), but  
443  $\beta$ -catenin stabilization in adult mouse liver and lung ECs produces only a slight effect (Munji et  
444 al., 2019). We repeated our CHIR treatment paradigm in hPSC-derived ECs after an extended  
445 period of *in vitro* culture, and observed much weaker induction of GLUT-1 and no pro-  
446 proliferative effect. Thus, our results support this hypothesis and suggest that the loss of BBB  
447 developmental plasticity in ECs is an intrinsic, temporally-controlled process rather than a result  
448 of the peripheral organ environment. Interestingly, ECs in non-BBB-forming regions of the CNS  
449 (i.e., CVOs), and in the anterior pituitary, which is directly proximal to the CNS, retain some of  
450 their plasticity in adulthood (Wang et al., 2019), possibly as the result of a delicate balance

451 between Wnt ligands and Wnt-inhibitory factors in these regions. Our model should facilitate  
452 additional systematic examination of factors that may enhance or attenuate EC Wnt  
453 responsiveness.

454 Finally, our work establishes an improved hPSC-based model for investigating  
455 mechanisms of BBB development in naïve ECs. hPSCs are an attractive model system to  
456 complement *in vivo* animal studies because they (i) are human, (ii) permit investigation of  
457 developmental processes in contrast to primary or immortalized cells, (iii) are highly scalable,  
458 (iv) can be derived from patients to facilitate disease modeling and autologous coculture systems,  
459 and (v) are genetically tractable. While widely used hPSC-based BBB models are useful for  
460 measuring molecular permeabilities and have been employed to understand genetic contributions  
461 to barrier dysfunction (Vatine et al., 2016, 2019; Lim et al., 2017), they have not been shown to  
462 proceed through a definitive endothelial progenitor intermediate (Lippmann et al., 2012; Lu et  
463 al., 2021) and express epithelial-associated genes (Qian et al., 2017; Delsing et al., 2018; Vatine  
464 et al., 2019; Lu et al., 2021). Thus, new models with developmentally relevant differentiation  
465 trajectories and definitive endothelial phenotype are needed for improved understanding of  
466 developmental mechanisms. Motivated in part by prior use of endothelial cells derived from  
467 hematopoietic progenitors in human cord blood to generate BBB models (Boyer-Di Ponio et al.,  
468 2014; Cecchelli et al., 2014), we and others recently showed that hPSC-derived naïve endothelial  
469 progenitors or ECs are good candidates for such a system (Praça et al., 2019; Nishihara et al.,  
470 2020; Roudnicky et al., 2020a, 2020b). For example, Praça *et al.* showed that a combination of  
471 VEGF, Wnt3a, and retinoic acid directed EPCs to brain capillary-like ECs with moderate  
472 transendothelial electrical resistance (TEER) of  $\sim 60 \times \text{cm}^2$ . We previously showed that BBB-like  
473 paracellular barrier characteristics are induced in hPSC-EPC-derived ECs after extended culture  
474 in a minimal medium. These so-called EECM-BMEC-like cells had TEER and small molecule

475 permeability similar to primary human brain ECs, well-developed tight junctions, and an  
476 immune cell adhesion molecule profile similar to brain ECs *in vivo* (Nishihara et al., 2020). In  
477 this study, we showed it was possible to use the small molecule Wnt agonist CHIR to induce  
478 additional hallmarks of CNS EC phenotype in hPSC-EPC-derived ECs, including canonical  
479 GLUT-1, claudin-5, and PLVAP effects (both Passage 1 and 3 CHIR-treated ECs). However, it  
480 is important to note that despite the improvements in CNS EC character with CHIR treatment,  
481 further improvements to functional endocytosis, and efflux transporter and solute carrier  
482 phenotype should be targets of future study and may be facilitated by cocultures and/or  
483 additional molecular factors. Along these lines, the Passage 1 CHIR-treated CNS-like ECs would  
484 be at a differentiation stage well suited to investigate cues subsequent to Wnt signaling that may  
485 be key for the induction of additional CNS EC properties. Alternatively, the Passage 3 CHIR-  
486 treated CNS-like ECs may be suitable for other BBB modeling applications. In summary, our  
487 work has defined the EC response to Wnt activation in a simplified, human system and  
488 established a new hPSC-derived *in vitro* model that will facilitate improved understanding of  
489 endothelial barrierogenesis.

490 **MATERIALS AND METHODS**

491 **Key resources table**

| Reagent type              | Designation                                                   | Source or reference                                          | Identifier      | Additional information    |
|---------------------------|---------------------------------------------------------------|--------------------------------------------------------------|-----------------|---------------------------|
| Cell line                 | iPSC: IMR90-4                                                 | Available from WiCell; (Jaffe et al., 2008)                  | RRID: CVCL_C437 |                           |
| Cell line                 | iPSC: WTC11                                                   | Available from Gladstone Institutes; (Kreitzer et al., 2013) | RRID: CVCL_Y803 |                           |
| Cell line                 | iPSC: CS03iCTRn2                                              | Available from Cedars Sinai iPSC Core                        |                 |                           |
| Cell line                 | iPSC: 19-9-11-7TGP-ishcat3                                    | Laboratory stock                                             |                 |                           |
| Cell line                 | hESC: H9-7TGP-ishcat2                                         | Laboratory stock (Lian et al., 2013)                         |                 |                           |
| Cell line                 | hESC: H9-CDH5-eGFP                                            | Laboratory stock (Bao et al., 2017)                          |                 |                           |
| Cell line                 | Primary human brain vascular pericytes                        | ScienCell                                                    | 1200            |                           |
| Antibody                  | Anti-CD31-FITC (mouse IgG1, clone AC128)                      | Miltenyi Biotec                                              | 130-117-390     |                           |
| Antibody                  | Anti-CD31-APC (mouse IgG1, clone AC128)                       | Miltenyi Biotec                                              | 130-119-891     |                           |
| Antibody                  | Anti-CD34-FITC (mouse IgG2a, clone AC136)                     | Miltenyi Biotec                                              | 130-113-178     |                           |
| Antibody                  | Anti- $\beta$ -catenin-Alexa Fluor 488 (mouse IgG1, clone 14) | BD Biosciences                                               | 562505          | 1:100 (ICC)               |
| Antibody                  | Anti-GLUT-1 (mouse IgG1, clone SPM498)                        | Invitrogen                                                   | MA5-11315       | 1:100 (ICC)<br>1:500 (WB) |
| Antibody                  | Anti-calponin (mouse IgG1, clone hCP)                         | Sigma-Aldrich                                                | C2687           | 1:15000 (ICC)             |
| Antibody                  | Anti-SM22 $\alpha$ (rabbit polyclonal)                        | Abcam                                                        | ab10146         | 1:1000 (ICC)              |
| Antibody                  | Anti-claudin-5 (mouse IgG1, clone 4C3C2)                      | Invitrogen                                                   | 35-2500         | 1:100 (ICC)<br>1:500 (WB) |
| Antibody                  | Anti-caveolin-1 (rabbit polyclonal)                           | Cell Signaling Technology                                    | 3238            | 1:500 (ICC)               |
| Antibody                  | Anti-VE-cadherin (mouse IgG2a, clone BV9)                     | Santa Cruz Biotechnology                                     | sc-52751        | 1:100 (ICC)<br>1:250 (WB) |
| Antibody                  | Anti- $\beta$ -actin (rabbit IgG, clone 13E5)                 | Cell Signaling Technology                                    | 4970            | 1:1000 (WB)               |
| Antibody                  | Anti-PLVAP (rabbit polyclonal)                                | Prestige Antibodies                                          | HPA002279       | 1:200 (ICC)<br>1:250 (WB) |
| Antibody                  | Anti-LSR (rabbit polyclonal)                                  | Prestige Antibodies                                          | HPA007270       | 1:250 (WB)                |
| Antibody                  | Alexa Fluor 488 goat anti-mouse IgG                           | Invitrogen                                                   | A-11001         | 1:200 (ICC)               |
| Antibody                  | Alexa Fluor 647 goat anti-rabbit IgG                          | Invitrogen                                                   | A-21245         | 1:200 (ICC)               |
| Antibody                  | Alexa Fluor 488 goat anti-mouse IgG1                          | Invitrogen                                                   | A-21121         | 1:200 (ICC)               |
| Antibody                  | Alexa Fluor 647 goat anti-mouse IgG2a                         | Invitrogen                                                   | A-21241         | 1:200 (ICC)               |
| Antibody                  | Alexa Fluor 555 goat anti-rabbit IgG                          | Invitrogen                                                   | A-21428         | 1:200 (ICC)               |
| Antibody                  | IRDye 800CW goat anti-mouse IgG                               | LI-COR Biosciences                                           | 926-32210       | 1:5000 (WB)               |
| Antibody                  | IRDye 800CW goat anti-rabbit IgG                              | LI-COR Biosciences                                           | 926-32211       | 1:5000 (WB)               |
| Antibody                  | IRDye 680RD goat anti-rabbit IgG                              | LI-COR Biosciences                                           | 926-68071       | 1:5000 (WB)               |
| Commercial assay or kit   | RNeasy Plus Micro Kit                                         | Qiagen                                                       | 74034           |                           |
| Chemical compound or drug | CHIR 99021                                                    | Tocris                                                       | 4423            |                           |
| Chemical compound or drug | Dextran, Alexa Fluor 488; 10,000 MW, Anionic, Fixable         | Invitrogen                                                   | D22910          |                           |

|                       |              |                               |              |
|-----------------------|--------------|-------------------------------|--------------|
| Software or algorithm | RSEM         | (Li and Dewey, 2011)          | v1.3.3       |
| Software or algorithm | Bowtie2      | (Langmead and Salzberg, 2012) | v2.4.2       |
| Software or algorithm | R            | R Foundation                  | v3.6.3       |
| Software or algorithm | DESeq2       | (Love et al., 2014)           | v1.26.0      |
| Software or algorithm | biomaRt      | (Durinck et al., 2009)        | v2.42.1      |
| Software or algorithm | FIJI/ImageJ  | (Schindelin et al., 2019)     | v2.0.0-rc-68 |
| Software or algorithm | Image Studio | LI-COR Biosciences            | v5.2         |
| Software or algorithm | FlowJo       | BD Biosciences                | v10.7.1      |
| Software or algorithm | JMP Pro      | SAS Institute                 | v14.0.0      |
| Software or algorithm | Prism        | GraphPad Software             | v5.0.1       |

492

### 493 **hPSC maintenance**

494 Tissue culture plates were coated with Matrigel, Growth Factor Reduced (Corning,  
495 Glendale, AZ). A 2.5 mg aliquot of Matrigel was thawed and resuspended in 30 mL DMEM/F-  
496 12 (Life Technologies, Carlsbad, CA), and the resulting solution used to coat plates at 8.7  
497  $\mu\text{g}/\text{cm}^2$  (1 mL per well for 6-well plates; 0.5 mL per well for 12-well plates). Plates were  
498 incubated at 37°C for at least 1 h prior to use. hPSCs were maintained on Matrigel-coated plates  
499 in E8 medium (STEMCELL Technologies, Vancouver, Canada) at 37°C, 5% CO<sub>2</sub>. hPSC lines  
500 used were: IMR90-4 iPSC, WTC11 iPSC, CS03iCTRn2 iPSC, H9-CDH5-eGFP hESC, H9-  
501 7TGP-ishcat2 hESC, and 19-9-11-7TGP-ishcat3 iPSC. Medium was changed daily. When hPSC  
502 colonies began to touch, typically at approximately 70–80% confluence, cells were passaged  
503 using Versene (Life Technologies). Briefly, cells were washed once with Versene, then  
504 incubated with Versene for 7 min at 37°C. Versene was removed and cells were dissociated into  
505 colonies by gentle spraying with E8 medium. Cells were transferred at a split ratio of 1:12 to a  
506 new Matrigel-coated plate containing E8 medium.

## 507 **Endothelial progenitor cell differentiation**

508 EPCs were differentiated according previously published protocols (Lian et al., 2014;  
509 Bao et al., 2016; Nishihara et al., 2020) with slight modifications. On day -3 (D-3), hPSCs were  
510 treated with Accutase (Innovative Cell Technologies, San Diego, CA) for 7 min at 37°C. The  
511 resulting single cell suspension was transferred to 4× volume of DMEM/F-12 (Life  
512 Technologies) and centrifuged for 5 min, 200×g. Cell number was quantified using a  
513 hemocytometer. Cells were resuspended in E8 medium supplemented with 10 μM ROCK  
514 inhibitor Y-27632 dihydrochloride (Tocris, Bristol, United Kingdom) and seeded on Matrigel-  
515 coated 12-well plates at a density of  $(1.5-2.5) \times 10^4$  cells/cm<sup>2</sup>, 1 mL per well. Cells were  
516 maintained at 37°C, 5% CO<sub>2</sub>. On the following two days (D-2 and D-1), the medium was  
517 replaced with E8 medium. The following day (D0), differentiation was initiated by changing the  
518 medium to LaSR medium (Advanced DMEM/F-12 [Life Technologies], 2.5 mM GlutaMAX  
519 [Life Technologies], and 60 μg/ml L-ascorbic acid 2-phosphate magnesium [Sigma-Aldrich, St.  
520 Louis, MO]) supplemented with 7–8 μM CHIR 99021 (Tocris), 2 mL per well. The following  
521 day (D1), medium was replaced with LaSR medium supplemented with 7–8 μM CHIR 99021, 2  
522 mL per well. On the following three days (D2, D3, and D4), the medium was replaced with pre-  
523 warmed LaSR medium (without CHIR), 2 mL per well.

524 On D5, EPCs were isolated using CD31 magnetic activated cell sorting (MACS). Cells  
525 were treated with Accutase for 15–20 min at 37°C. The resulting cell suspension was passed  
526 through a 40 μm cell strainer into an equal volume of DMEM (Life Technologies) supplemented  
527 with 10% FBS (Peak Serum, Wellington, CO) and centrifuged for 5 min, 200×g. Cell number  
528 was quantified using a hemocytometer. Cells were resuspended in MACS buffer (Dulbecco's  
529 phosphate buffered saline without Ca and Mg [DPBS; Life Technologies] supplemented with  
530 0.5% bovine serum albumin [Sigma-Aldrich] and 2 mM EDTA [Sigma-Aldrich]) at a



531 concentration of  $10^7$  cells per 100  $\mu$ L. The CD31-FITC antibody (Miltenyi Biotec, Auburn, CA)  
532 was added to the cell suspension at a dilution of 1:50. The cell suspension was incubated for 30  
533 min at room temperature, protected from light. The cell suspension was brought to a volume of  
534 15 mL with MACS buffer and centrifuged for 5 min,  $200\times g$ . The supernatant was aspirated and  
535 the pellet resuspended in MACS buffer at a concentration of  $10^7$  cells per 100  $\mu$ L. The FITC  
536 Selection Cocktail from the EasySep Human FITC Positive Selection Kit (STEMCELL  
537 Technologies) was added at a dilution of 1:10 and the cell suspension was incubated for 20 min  
538 at room temperature, protected from light. The Dextran RapidSpheres (magnetic particles)  
539 solution from the Selection Kit was added at a dilution of 1:20 and the cell suspension was  
540 incubated for an additional 15 min at room temperature.

541 The cell suspension was brought to a total volume of 2.5 mL with MACS buffer (for total  
542 cell number less than  $2\times 10^8$ , the approximate maximum yield from two 12-well plates; for a  
543 larger number of plates/cells, a total volume of 5 mL was used). 2.5 mL of cell suspension was  
544 transferred to a sterile 5 mL round-bottom flow cytometry tube and placed in the EasySep  
545 magnet (STEMCELL Technologies) for 5 min. The magnet was inverted to pour off the  
546 supernatant, the flow tube removed, the retained cells resuspended in 2.5 mL of MACS buffer,  
547 and the flow tube placed back in the magnet for 5 min. This step was repeated 3 times, and the  
548 resulting cell suspension transferred to a centrifuge tube, and centrifuged for 5 min,  $200\times g$ . Cell  
549 number was quantified using a hemocytometer. Resulting EPCs were used directly for  
550 experiments as described below or cryopreserved in hECSR medium supplemented with 30%  
551 FBS and 10% DMSO for later use. hECSR medium is Human endothelial serum-free medium  
552 (Life Technologies) supplemented with  $1\times$  B-27 supplement (Life Technologies) and 20 ng/mL  
553 FGF2 (Waisman Biomanufacturing, Madison, WI).

554 **Neural rosette differentiation**

555 Neural rosettes were differentiated according to a previously published protocol  
556 (Lippmann et al., 2014) with slight modifications. On D-1, IMR90-4 hPSCs were dissociated  
557 with Accutase and seeded on Matrigel-coated plates in E8 medium supplemented with ROCK  
558 inhibitor as described above, except the cell seeding density was  $5 \times 10^5$  cells/cm<sup>2</sup>. The following  
559 day (D0), medium was replaced with E6 medium (DMEM/F-12 supplemented with 64 mg/L L-  
560 ascorbic acid 2-phosphate magnesium, 14 µg/L sodium selenium, 543 mg/L sodium bicarbonate,  
561 19.4 mg/L insulin [Roche, Penzberg, Germany], and 10.7 mg/L holo-transferrin [Sigma-  
562 Aldrich]) prepared according to (Chen et al., 2011). Medium was replaced daily with E6 medium  
563 on D1 through D5. On D6, medium was replaced with hECSR medium lacking FGF2. The  
564 following day (D7), the resulting neural rosette-conditioned medium (NR-CM) was harvested  
565 and stored at 4°C, and fresh hECSR medium lacking FGF2 was replaced. NR-CM was likewise  
566 harvested on D8, D9, and D10. The resulting NR-CM aliquots were pooled, passed through a 0.2  
567 µm filter, supplemented with 20 ng/mL FGF2, and used for experiments as described below.

568 **Astrocyte differentiation**

569 Astrocytes were differentiated via an hPSC-derived EZ sphere intermediate according to  
570 previously published protocols (Ebert et al., 2013; Sareen et al., 2014; Canfield et al., 2017).  
571 Briefly, CS03iCTRn2 hPSCs were dissociated with Versene and colonies were transferred to an  
572 ultra-low attachment T-25 flask containing EZ sphere culture medium (a mixture of DMEM and  
573 F-12 medium in a 7:3 ratio supplemented with 1× B-27 supplement minus vitamin A [Life  
574 Technologies], 2 µg/mL heparin [Sigma-Aldrich], 100 ng/mL EGF [Peprotech], 100 ng/mL  
575 FGF2, and 1× antibiotic-antimycotic [Life Technologies]). Half of the volume of EZ sphere  
576 culture medium was replaced on Mondays, Wednesdays, and Fridays. EZ spheres were passaged  
577 every Friday by mechanical dissociation with 2–4 passes on a McIlwain Tissue Chopper

578 (Campden Instruments, Loughborough, United Kingdom), with half of the resulting aggregates  
579 returned to the flask and half discarded. To convert EZ spheres into astrospheres, which are  
580 neural stem cell aggregates with enhanced astrocyte differentiation potential, medium was  
581 changed to DMEM/F-12 supplemented with 1× N-2 supplement (Life Technologies), 2 µg/mL  
582 heparin, 1× MEM-non-essential amino acids solution (Life Technologies), and 0.5 µM all-trans  
583 retinoic acid (Sigma-Aldrich) and replaced daily for 11 days. The resulting spheres were  
584 passaged as described above and returned to EZ sphere culture medium, which was replaced on  
585 Mondays, Wednesdays, and Fridays. Astrospheres were passaged on Fridays as described above  
586 and cultured for at least 30 passages prior to initiating astrocyte differentiation. To differentiate  
587 astrocytes, astrospheres were treated with Accutase for 10–15 min at 37°C, followed by gentle  
588 pipetting to dissociate and singularize the cells. The resulting single cell suspension was  
589 transferred to 4× volume of DMEM/F-12 and centrifuged for 5 min, 200×g. Cell number was  
590 quantified using a hemocytometer. Cells were resuspended in EZ sphere culture medium and  
591 seeded on Matrigel-coated plates at approximately  $2.5 \times 10^4$  cells/cm<sup>2</sup>. The following day,  
592 medium was changed to astrocyte differentiation medium (DMEM/F-12 supplemented with 1×  
593 N-2 supplement, 2 µg/mL heparin, and 1× MEM-non-essential amino acids solution). This  
594 medium was replaced every other day for 2 weeks. Medium was then replaced with hECSR  
595 medium lacking FGF2. The following day, the resulting astrocyte-conditioned medium (Astro-  
596 CM) was harvested and stored at 4°C, and fresh hECSR medium lacking FGF2 was replaced.  
597 Astro-CM was likewise harvested on the following 3 days. The resulting Astro-CM aliquots  
598 were pooled, passed through a 0.2 µm filter, supplemented with 20 ng/mL FGF2, and used for  
599 experiments as described below.

## 600 **Endothelial cell culture and treatment**

601 Collagen IV (Sigma-Aldrich) was dissolved in 0.5 mg/mL acetic acid to a final  
602 concentration of 1 mg/mL. Collagen IV-coated plates were prepared by diluting a volume of this  
603 stock solution 1:100 in water, adding the resulting solution to tissue culture plates, or #1.5 glass  
604 bottom plates (Cellvis, Sunnyvale, CA) for cells intended for confocal imaging (1 mL per well  
605 for 6-well plates, 0.5 mL per well for 12-well plates, 0.25 mL per well for 24-well plates), and  
606 incubating the plates for 1 h at RT. Collagen IV coating solution was removed and EPCs  
607 obtained as described above were suspended in hECSR medium and plated at approximately  
608  $3 \times 10^4$  cells/cm<sup>2</sup>. In some experiments, cells were suspended in NR-CM, Astro-CM, or Peri-CM.  
609 In some experiments, ligands and small molecules were added to hECSR medium or Peri-CM:  
610 CHIR 99021 (Tocris) was used at 4  $\mu$ M except where indicated; DMSO (Sigma-Aldrich) was  
611 used as a vehicle control for CHIR; Wnt3a (R&D Systems) was used at 20 ng/mL; Wnt7a  
612 (Peprotech, Rocky Hill, NJ) was used at 50 ng/mL; Wnt7b (Abnova, Taipei, Taiwan) was used at  
613 50 ng/mL; R-spondin 1 (Rspo1; Peprotech) was used at 50 ng/mL; doxycycline was used at 1, 2,  
614 or 4  $\mu$ g/mL. The hECSR medium or CM, including any ligands or small molecules, was replaced  
615 every other day until confluent (typically 6 days). We denote this time point “Passage 1.”

616 For extended culture, ECs were selectively dissociated and replated as previously  
617 described (Nishihara et al., 2020). Cells were incubated with Accutase until endothelial cells  
618 appeared round, typically 2–3 min at 37°C. The plate was tapped to release the ECs while  
619 SMLCs remained attached, and the EC-enriched cell suspension transferred to 4 $\times$  volume of  
620 DMEM/F-12 and centrifuged for 5 min, 200 $\times$ g. Cells were resuspended in hECSR medium and  
621 seeded on a new collagen IV-coated plate at approximately  $3 \times 10^4$  cells/cm<sup>2</sup>. hECSR medium  
622 was replaced every other day until confluent (typically 6 days). The selective dissociation and  
623 seeding described above was repeated, and hECSR medium was again replaced every other day

624 until confluent (typically 6 days). We denote this time point “Passage 3.” In one experiment,  
625 these steps were repeated for another two passages. Except where indicated, CHIR 99021 or  
626 vehicle (DMSO) was included in the hECSR medium for the entire duration of culture.

### 627 **RNA-seq**

628 RNA-seq was performed on ECs and SMLCs from the IMR90-4 hPSC line. Four  
629 independent differentiations were performed, with DMSO-, CHIR-, and Wnt7a/b-treated ECs at  
630 Passage 1 analyzed from all four differentiations. DMSO- and CHIR-treated ECs at Passage 3  
631 were analyzed from three of the four differentiations. DMSO-treated SMLCs at Passage 1 were  
632 analyzed from two of the four differentiations. Fluorescence-activated cell sorting (FACS) was  
633 used to isolate CD31<sup>+</sup> ECs and CD31<sup>-</sup> SMLCs from mixed Passage 1 cultures. Cells were  
634 incubated with Accutase for 10 min at 37°C, passed through 40 µm cell strainers into 4× volume  
635 of DMEM/F-12, and centrifuged for 5 min, 200×g. Cells were resuspended in MACS buffer and  
636 incubated with CD31-APC antibody (Miltenyi Biotec) for 30 min at 4°C, protected from light.  
637 The cell suspension was brought to a volume of 15 mL with MACS buffer and centrifuged at  
638 4°C for 5 min, 200×g. Cells were resuspended in MACS buffer containing 2 µg/mL 4',6-  
639 diamidino-2-phenylindole (DAPI; Life Technologies). A BD FACSAria III Cell Sorter (BD  
640 Biosciences, San Jose, CA) was used to isolate DAPI<sup>-</sup>CD31<sup>+</sup> cells (live ECs) and DAPI<sup>-</sup>CD31<sup>-</sup>  
641 cells (live SMLCs). The resulting cell suspensions were centrifuged at 4°C for 5 min, 200×g, and  
642 cell pellets immediately processed for RNA extraction as described below.

643 RNA was isolated using the RNeasy Plus Micro Kit (Qiagen, Germantown, MD). Buffer  
644 RLT Plus supplemented with 1% β-mercaptoethanol was used to lyse cells (pellets from FACS  
645 of Passage 1 cells, or directly on plates for Passage 3 ECs). Lysates were passed through gDNA  
646 Eliminator spin columns, loaded onto RNeasy MinElute spin columns, washed with provided  
647 buffers according to manufacturer instructions, and eluted with RNase-free water. Sample

648 concentrations were determined using a NanoDrop spectrophotometer (Thermo Scientific,  
649 Waltham, MA) and RNA quality assayed using an Agilent 2100 Bioanalyzer with Agilent RNA  
650 6000 Pico Kit (Agilent, Santa Clara, CA). First-strand cDNA synthesis was performed using the  
651 SMART-Seq v4 Ultra Low Input RNA kit (Takara Bio, Mountain View, CA) with 5 ng input  
652 RNA followed by 9 cycles of PCR amplification and library preparation using the Nextera XT  
653 DNA Library Prep Kit (Illumina, San Diego, CA). Sequencing was performed on a NovaSeq  
654 6000 (Illumina), with approximately 40–60 million 150 bp paired-end reads obtained for each  
655 sample.

656 FASTQ files were aligned to the human genome (hg38) and transcript abundances  
657 quantified using RSEM (v1.3.3) (Li and Dewey, 2011) calling bowtie2 (v2.4.2) (Langmead and  
658 Salzberg, 2012). Estimated counts from RSEM were input to DESeq2 (v1.26.0) (Love et al.,  
659 2014) implemented in R (v3.6.3) for differential expression analysis. Elsewhere, transcript  
660 abundances are presented as transcripts per million (TPM). Differentiation pairing as described  
661 above was included in the DESeq2 designs. The Wald test with Benjamini-Hochberg correction  
662 was used to generate adjusted P-values. Principal component analysis was performed on counts  
663 after the DESeq2 variance stabilizing transformation. Bulk RNA-seq data from the literature  
664 (FASTQ files; see *Previously published datasets used*) were obtained from the Gene Expression  
665 Omnibus (GEO). These FASTQ files were aligned to the mouse genome (mm10) and transcript  
666 abundances quantified as described above. DESeq2 was used for differential expression analysis  
667 as described above. For direct comparison of human and mouse data, the biomaRt package  
668 (v2.42.1) (Durinck et al., 2009) and Ensembl database (Yates et al., 2019) was used to map  
669 human gene names to mouse homologs. Venn diagrams were generated using the tool available  
670 at <http://bioinformatics.psb.ugent.be/webtools/Venn/>. To identify solute carrier and efflux  
671 transporter genes highly expressed at the human BBB *in vivo*, we used five human brain scRNA-

672 seq datasets (see *Previously published datasets used*) integrated in a previous meta-analysis  
673 (Gastfriend et al., 2021). *SLC* and *ABC* genes with average expression greater than 100 TPM in  
674 endothelial cells across the five independent datasets were selected.

## 675 **Immunocytochemistry**

676 Immunocytochemistry was performed in 24-well plates. Cells were washed once with  
677 500  $\mu$ L DPBS and fixed with 500  $\mu$ L cold ( $-20^{\circ}\text{C}$ ) methanol for 5 min, except cells intended for  
678 calponin/SM22a detection, which were fixed with 500  $\mu$ L of 4% paraformaldehyde for 15 min.  
679 Cells were washed three times with 500  $\mu$ L DPBS and blocked in 150  $\mu$ L DPBS supplemented  
680 with 10% goat serum (Life Technologies) for 1 h at room temperature, except cells intended for  
681 calponin/SM22 $\alpha$  detection, which were blocked and permeabilized in DPBS supplemented with  
682 3% BSA and 0.1% Triton X-100. Primary antibodies diluted in 150  $\mu$ L of the above blocking  
683 solutions (see *Key Resources Table* for antibody information) were added to cells and incubated  
684 overnight at  $4^{\circ}\text{C}$  on a rocking platform. Cells were washed three times with 500  $\mu$ L DPBS.  
685 Secondary antibodies diluted in 150  $\mu$ L of the above blocking solutions (see *Key Resources*  
686 *Table* for antibody information) were added to cells and incubated for 1 h at room temperature  
687 on a rocking platform, protected from light. Cells were washed three times with 500  $\mu$ L DPBS,  
688 followed by 5 min incubation with 500  $\mu$ L DPBS plus 4  $\mu$ M Hoechst 33342 (Life Technologies).  
689 Images were acquired using an Eclipse Ti2-E epifluorescence microscope (Nikon, Tokyo, Japan)  
690 with a 20 $\times$  objective or an A1R-Si+ confocal microscope (Nikon) with a 100 $\times$  oil objective.  
691 Confocal images were acquired with 1  $\mu$ m slice spacing.

692 Images were analyzed using FIJI (ImageJ) software. For epifluorescence images, 5 fields  
693 (20 $\times$ ) were analyzed per well, with 3–4 wells per treatment condition. For quantification of cell  
694 number, EC colonies were manually outlined, and the Analyze Particles function was used to  
695 estimate the number of nuclei within the EC colonies. Nuclei outside the EC colonies were

696 manually counted. EC purity (% EC) was calculated as the number of nuclei within EC colonies  
697 relative to total nuclei. To estimate % GLUT-1<sup>+</sup> ECs, cells within the EC colonies with  
698 membrane-localized GLUT-1 immunoreactivity (e.g., arrowheads in Figure 2B) were manually  
699 counted. For quantification of fluorescence intensity in epifluorescence images, EC colonies  
700 were manually outlined, and the Measure function was used to obtain the mean fluorescence  
701 intensity for each image channel (fluorophore). A cell-free area of the plate was similarly  
702 quantified for background subtraction. Following background subtraction, the mean fluorescence  
703 intensity of each protein of interest was normalized to the mean fluorescence intensity of  
704 Hoechst to correct for effects of cell density. For confocal images, 3–4 fields (100×) containing  
705 only VE-cadherin<sup>+</sup> ECs were analyzed per well, with 4 wells per treatment condition. The first  
706 slice with visible nuclei (closest to glass) was defined as  $Z = 0$ , and the Measure function was  
707 used to obtain the mean fluorescence intensity for each image channel (fluorophore) in each slice  
708 from  $Z = 0$  to  $Z = 7 \mu\text{m}$ . A cell-free area of the plate was similarly quantified for background  
709 subtraction. After background subtraction, to approximate total abundance (area under the  
710 fluorescence versus  $Z$  curve, AUC) for each channel, mean fluorescence intensities were  
711 summed across all slices. AUC for the proteins of interest were normalized to Hoechst AUC.

## 712 **Western blotting**

713 To enrich samples from Passage 1 cultures for ECs, the Accutase-based selective  
714 dissociation method described above was employed. Dissociated cells were centrifuged for 5  
715 min, 200×g, and resulting cell pellets were lysed in RIPA buffer (Rockland Immunochemicals,  
716 Pottstown, PA) supplemented with 1× Halt Protease Inhibitor Cocktail (Thermo Scientific).  
717 Passage 3 cells were lysed with the above buffer directly on plates. Lysates were centrifuged at  
718 4°C for 5 min, 14,000×g, and protein concentration in supernatants quantified using the Pierce  
719 BCA Protein Assay Kit (Thermo Scientific). Equal amounts of protein were diluted to equal



720 volume with water, mixed with sample buffer, and heated at 95°C for 5 min, except lysates  
721 intended for GLUT-1 Western blotting, which were not heated. Samples were resolved on 4–  
722 12% Tris-Glycine gels and transferred to nitrocellulose membranes. Membranes were blocked  
723 for 1 h in tris-buffered saline plus 0.1% Tween-20 (TBST) supplemented with 5% non-fat dry  
724 milk. Primary antibodies (see *Key Resources Table* for antibody information) diluted in TBST  
725 plus 5% non-fat dry milk were added to membranes and incubated overnight at 4°C on a rocking  
726 platform. Membranes were washed five times with TBST. Secondary antibodies (see *Key*  
727 *Resources Table* for antibody information) diluted in TBST were added to membranes and  
728 incubated for 1 h at room temperature on a rocking platform, protected from light. Membranes  
729 were washed five times with TBST and imaged using an Odyssey 9120 (LI-COR, Lincoln, NE).  
730 Band intensities were quantified using Image Studio software (LI-COR).

### 731 **Dextran accumulation assay**

732 A fixable, Alexa Fluor 488-conjugated dextran with an average molecular weight of 10  
733 kDa (Invitrogen) was used as a tracer to estimate total fluid-phase endocytosis. Dextran was  
734 added at 10  $\mu$ M to the medium of Passage 1 cultures. Plates were incubated on rotating platforms  
735 at 37°C or 4°C for 2 h. Medium was removed and cells were washed once with DPBS, and then  
736 incubated with Accutase for 10 min at 37°C. Cell suspensions were passed through 40  $\mu$ m cell  
737 strainers into 4 $\times$  volume of DMEM/F-12 and centrifuged for 5 min, 200 $\times$ g. Cells were  
738 resuspended in MACS buffer and incubated with the CD31-APC antibody (Miltenyi Biotec) for  
739 30 min at 4°C, protected from light. Cell suspensions were brought to a volume of 5 mL with  
740 MACS buffer and centrifuged at 4°C for 5 min, 200 $\times$ g. Pellets were resuspended in DPBS  
741 supplemented with 4% paraformaldehyde and incubated for 15 min at room temperature,  
742 protected from light. Cells were centrifuged for 5 min, 200 $\times$ g. Pellets were resuspended in  
743 MACS buffer and analyzed on a BD FACSCalibur flow cytometer (BD Biosciences). FlowJo

744 software (BD Biosciences) was used to gate CD31<sup>+</sup> cells and quantify geometric mean  
745 fluorescence intensity and coefficient of variation (CV) of dextran.

## 746 **Statistics**

747 Individual wells of cultured cells that underwent identical experimental treatments are  
748 defined as replicates, and all key experiments were repeated using multiple independent hPSC  
749 differentiations. Detailed information about replication strategy is provided in figure legends.  
750 Student's *t* test was used for comparison of means from two experimental groups. One-way  
751 analysis of variance (ANOVA) was used for comparison of means from three or more  
752 experimental groups, followed by Dunnett's post-hoc test for comparison of multiple treatments  
753 to a single control, or Tukey's honest significant difference (HSD) post-hoc test for multiple  
754 pairwise comparisons. When data from multiple differentiations were combined, two-way  
755 ANOVA (one factor being the experimental treatment and one factor being the differentiation)  
756 was used for comparison of means to achieve blocking of differentiation-based variability,  
757 followed by post-hoc tests as described above if more than two experimental treatments were  
758 compared. For fluorescence intensities (a.u.), two-way ANOVA was performed prior to  
759 normalization of these values to the control group within each differentiation (for visualization in  
760 plots). Statistical tests were performed in JMP Pro (v15.0.0). For RNA-seq differential  
761 expression analysis, the DESeq2 Wald test with Benjamini-Hochberg correction was used to  
762 calculate P-values. Descriptions of the statistical tests used are provided in figure legends.

763 **Acknowledgements**

764 We acknowledge the University of Wisconsin–Madison Biotechnology Center Gene  
765 Expression Center and DNA Sequencing Facility for providing library preparation and next  
766 generation sequencing services. We acknowledge the University of Wisconsin–Madison  
767 Biochemistry Optical Core for use of a confocal microscope. We acknowledge the University of  
768 Wisconsin Carbone Cancer Center Flow Cytometry Laboratory (supported by NIH Cancer  
769 Center Support Grant P30 CA014520) for performing FACS. This work was funded by NIH  
770 (NS103844 and NS107461 to EVS and SPP), the Swiss National Science Foundation (grant  
771 310030\_189080 to BE), and the Bern Center for Precision Medicine to BE. BDG was supported  
772 by NIH Biotechnology Training Program grant T32 GM008349 and the National Science  
773 Foundation Graduate Research Fellowship Program under grant number 1747503. HN was  
774 supported by a JSPS Overseas Research Fellowship.

775

776 **Competing interests**

777 BDG, HN, BE, SPP, and EVS have filed an invention disclosure related to this work with  
778 the Wisconsin Alumni Research Foundation.

779

780 **Supplementary files**

- 781 • **Supplementary file 1. RNA-sequencing gene expression data for hPSC-derived ECs**  
782 **and SMLCs.** Abundances are provided in transcripts per million (TPM).
- 783 • **Supplementary file 2. RNA-sequencing differential expression analysis of hPSC-**  
784 **derived ECs.** DESeq2-derived average expression (baseMean),  $\log_2$ (fold change), Wald  
785 statistic, P-value (Wald test), and adjusted P-value (Benjamini-Hochberg correction) are

786 shown. **(A)** Passage 1 CHIR-treated ECs versus Passage 1 DMSO-treated ECs. **(B)**  
787 Passage 1 Wnt7a/b-treated ECs versus Passage 1 DMSO-treated ECs. **(C)** Passage 3  
788 CHIR-treated ECs versus Passage 3 DMSO-treated ECs. **(D)** Passage 3 DMSO-treated  
789 ECs versus Passage 1 DMSO-treated ECs. **(E)** Lists of upregulated and downregulated  
790 genes comprising the intersection of the comparisons in (A) and (B), and (A) and (C),  
791 used to generate Venn diagrams in Figure 8E.

792 • **Supplementary file 3. Wnt-regulated EC genes in multiple contexts.** **(A)** Differential  
793 expression analysis of P7 murine brain, liver, lung, and kidney ECs (Sabbagh et al.,  
794 2018). DESeq2-derived average expression (baseMean),  $\log_2$ (fold change), Wald  
795 statistic, P-value (Wald test), and adjusted P-value (Benjamini-Hochberg correction) are  
796 shown. **(B)** Lists of brain-enriched and brain-depleted genes comprising the intersection  
797 of the comparisons in (A). **(C-E)** Differential expression analysis of adult murine ECs  
798 with  $\beta$ -catenin-stabilization versus controls from pituitary (Wang et al., 2019) (C), liver  
799 (Munji et al., 2019) (D), and brain ECs cultured *in vitro* (Sabbagh and Nathans, 2020)  
800 (E). DESeq2-derived average expression (baseMean),  $\log_2$ (fold change), Wald statistic,  
801 P-value (Wald test), and adjusted P-value (Benjamini-Hochberg correction) are shown.  
802 **(F)** Lists of concordantly Wnt-regulated genes in Passage 1 hPSC-derived ECs and the  
803 three comparisons shown in (C-E), from the set of brain-enriched and brain-depleted  
804 genes identified in (B).

805

## 806 **Data availability**

807 RNA-seq data have been deposited in GEO.

808

809

810 **Previously published datasets used**

| Citation                    | Description                                                                                                         | Identifiers                                                                                                                              | Source                                                                                                                                                                                              |
|-----------------------------|---------------------------------------------------------------------------------------------------------------------|------------------------------------------------------------------------------------------------------------------------------------------|-----------------------------------------------------------------------------------------------------------------------------------------------------------------------------------------------------|
| (Sabbagh et al., 2018)      | Adult mouse postnatal day 7 brain, liver, lung, and kidney ECs                                                      | GSM3040844<br>GSM3040845<br>GSM3040852<br>GSM3040853<br>GSM3040858<br>GSM3040859<br>GSM3040864<br>GSM3040865                             | <a href="https://www.ncbi.nlm.nih.gov/geo/query/acc.cgi?acc=GSE111839">https://www.ncbi.nlm.nih.gov/geo/query/acc.cgi?acc=GSE111839</a>                                                             |
| (Munji et al., 2019)        | Adult mouse liver ECs (controls and $\beta$ -catenin gain-of-function)                                              | GSM2498580<br>GSM2498581<br>GSM2498582<br>GSM2498583<br>GSM2498584<br>GSM2498585<br>GSM2498586<br>GSM2498587                             | <a href="https://www.ncbi.nlm.nih.gov/geo/query/acc.cgi?acc=GSE95201">https://www.ncbi.nlm.nih.gov/geo/query/acc.cgi?acc=GSE95201</a>                                                               |
| (Wang et al., 2019)         | Adult mouse anterior and posterior pituitary ECs (controls and $\beta$ -catenin gain-of-function)                   | GSM3455653<br>GSM3455654<br>GSM3455657<br>GSM3455658<br>GSM3455661<br>GSM3455662<br>GSM3455665<br>GSM3455666                             | <a href="https://www.ncbi.nlm.nih.gov/geo/query/acc.cgi?acc=GSE122117">https://www.ncbi.nlm.nih.gov/geo/query/acc.cgi?acc=GSE122117</a>                                                             |
| (Sabbagh and Nathans, 2020) | Adult mouse brain ECs cultured <i>in vitro</i> (controls and $\beta$ -catenin gain-of-function)                     | GSM4160534<br>GSM4160535<br>GSM4160536<br>GSM4160537<br>GSM4160538<br>GSM4160539<br>GSM4160540<br>GSM4160541<br>GSM4160542<br>GSM4160543 | <a href="https://www.ncbi.nlm.nih.gov/geo/query/acc.cgi?acc=GSE118731">https://www.ncbi.nlm.nih.gov/geo/query/acc.cgi?acc=GSE118731</a>                                                             |
| (Gastfriend et al., 2021)   | Meta-analysis of human brain single cells across multiple developmental stages and brain regions (enumerated below) |                                                                                                                                          |                                                                                                                                                                                                     |
| Allen Institute, 2019       | Adult neocortex                                                                                                     |                                                                                                                                          | <a href="https://portal.brain-map.org/atlas-and-data/rnaseq/human-multiple-cortical-areas-smart-seq">https://portal.brain-map.org/atlas-and-data/rnaseq/human-multiple-cortical-areas-smart-seq</a> |
| (Polioudakis et al., 2019)  | GW17-18 neocortex                                                                                                   |                                                                                                                                          | <a href="http://solo.bmap.ucla.edu/shiny/webapp/">http://solo.bmap.ucla.edu/shiny/webapp/</a>                                                                                                       |
| (Han et al., 2020)          | Adult temporal lobe and cerebellum                                                                                  | GSM3980129<br>GSM4008656<br>GSM4008657<br>GSM4008658                                                                                     | <a href="https://www.ncbi.nlm.nih.gov/geo/query/acc.cgi?acc=GSE134355">https://www.ncbi.nlm.nih.gov/geo/query/acc.cgi?acc=GSE134355</a>                                                             |
| (La Manno et al., 2016)     | GW6-11 ventral midbrain                                                                                             |                                                                                                                                          | <a href="https://www.ncbi.nlm.nih.gov/geo/query/acc.cgi?acc=GSE76381">https://www.ncbi.nlm.nih.gov/geo/query/acc.cgi?acc=GSE76381</a>                                                               |
| (Zhong et al., 2020)        | GW16-27 hippocampus                                                                                                 |                                                                                                                                          | <a href="https://www.ncbi.nlm.nih.gov/geo/query/acc.cgi?acc=GSE119212">https://www.ncbi.nlm.nih.gov/geo/query/acc.cgi?acc=GSE119212</a>                                                             |

812 **REFERENCES**

- 813 Andreone BJ, Chow BW, Tata A, Lacoste B, Ben-Zvi A, Bullock K, Deik AA, Ginty DD, Clish  
814 CB, Gu C. 2017. Blood-Brain Barrier Permeability Is Regulated by Lipid Transport-  
815 Dependent Suppression of Caveolae-Mediated Transcytosis. *Neuron* **94**:581-594.e5.  
816 doi:10.1016/j.neuron.2017.03.043
- 817 Armulik A, Genové G, Mäe M, Nisancioglu MH, Wallgard E, Niaudet C, He L, Norlin J,  
818 Lindblom P, Strittmatter K, Johansson BR, Betsholtz C. 2010. Pericytes regulate the blood-  
819 brain barrier. *Nature* **468**:557–561. doi:10.1038/nature09522
- 820 Bao X, Bhute VJ, Han T, Qian T, Lian X, Palecek SP. 2017. Human pluripotent stem cell-  
821 derived epicardial progenitors can differentiate to endocardial-like endothelial cells 191–  
822 201. doi:10.1002/btm2.10062
- 823 Bao X, Lian X, Palecek SP. 2016. Directed Endothelial Progenitor Differentiation from Human  
824 Pluripotent Stem Cells Via Wnt Activation Under Defined Conditions. *Methods Mol Biol*  
825 **1481**:183–96. doi:10.1007/978-1-4939-6393-5\_17
- 826 Bauer B, Hartz AMS, Fricker G, Miller DS. 2004. Pregnane X receptor up-regulation of P-  
827 glycoprotein expression and transport function at the blood-brain barrier. *Mol Pharmacol*  
828 **66**:413–419. doi:10.1124/mol.66.3.
- 829 Ben-Zvi A, Lacoste B, Kur E, Andreone BJ, Mayshar Y, Yan H, Gu C. 2014. Mfsd2a is critical  
830 for the formation and function of the blood–brain barrier. *Nature* **509**:507–11.  
831 doi:10.1038/nature13324
- 832 Benz F, Wichitnaowarat V, Lehmann M, Germano RF, Mihova D, Macas J, Adams RH, Mark  
833 Taketo M, Plate KH, Guérit S, Vanhollebeke B, Liebner S. 2019. Low wnt/ $\beta$ -catenin  
834 signaling determines leaky vessels in the subfornical organ and affects water homeostasis in  
835 mice. *Elife* **8**:1–29. doi:10.7554/eLife.43818
- 836 Berezowski V, Landry C, Dehouck MP, Cecchelli R, Fenart L. 2004. Contribution of glial cells  
837 and pericytes to the mRNA profiles of P-glycoprotein and multidrug resistance-associated  
838 proteins in an in vitro model of the blood-brain barrier. *Brain Res* **1018**:1–9.  
839 doi:10.1016/j.brainres.2004.05.092
- 840 Boyer-Di Ponio J, El-Ayoubi F, Glacial F, Ganeshamoorthy K, Guillevic O, Couraud PO,  
841 Driancourt C, Godet M, Perrie N, Uzan G, Boyer-Di Ponio J, El-Ayoubi F, Glacial F,  
842 Ganeshamoorthy K, Driancourt C, Godet M, Perrière N, Guillevic O, Olivier Couraud P,  
843 Uzan G, Ponio JB, El-Ayoubi F, Glacial F, Ganeshamoorthy K, Guillevic O, Couraud PO,  
844 Driancourt C, Godet M, Perrie N, Uzan G. 2014. Instruction of circulating endothelial  
845 progenitors in vitro towards specialized blood-brain barrier and arterial phenotypes. *PLoS*  
846 *One* **9**. doi:10.1371/journal.pone.0084179
- 847 Canfield SG, Stebbins MJ, Morales BS, Asai SW, Vatine GD, Svendsen CN, Palecek SP, Shusta  
848 E V. 2017. An isogenic blood–brain barrier model comprising brain endothelial cells,  
849 astrocytes, and neurons derived from human induced pluripotent stem cells. *J Neurochem*  
850 **140**:874–888. doi:10.1111/jnc.13923

- 851 Castro Dias M, Coisne C, Lazarevic I, Baden P, Hata M, Iwamoto N, Miguel D, Francisco F,  
852 Vanlandewijck M, He L, Baier FA, Stroka D, Bruggmann R, Lyck R, En G, Deutsch U,  
853 Betsholtz C, Furuse M, Shoichiro T, Engelhardt B, Castro Dias M, Coisne C, Lazarevic I,  
854 Baden P, Hata M, Iwamoto N, Francisco DMF, Vanlandewijck M, He L, Baier FA, Stroka  
855 D, Bruggmann R, Lyck R, Enzmann G, Deutsch U, Betsholtz C, Furuse M, Tsukita S,  
856 Engelhardt B. 2019. Claudin-3-deficient C57BL/6J mice display intact brain barriers. *Sci*  
857 *Rep* **9**:1–16. doi:10.1038/s41598-018-36731-3
- 858 Cecchelli R, Aday S, Sevin E, Almeida C, Culot M, Dehouck L, Coisne C, Engelhardt B,  
859 Dehouck MP, Ferreira L. 2014. A stable and reproducible human blood-brain barrier model  
860 derived from hematopoietic stem cells. *PLoS One* **9**. doi:10.1371/journal.pone.0099733
- 861 Chen G, Gulbranson DR, Hou Z, Bolin JM, Ruotti V, Probasco MD, Smuga-Otto K, Howden  
862 SE, Diol NR, Propson NE, Wagner R, Lee GO, Antosiewicz-Bourget J, Teng JMC,  
863 Thomson JA. 2011. Chemically defined conditions for human iPSC derivation and culture.  
864 *Nat Methods* **8**:424–429. doi:10.1038/nmeth.1593
- 865 Cho C, Smallwood PM, Nathans J. 2017. Reck and Gpr124 Are Essential Receptor Cofactors for  
866 Wnt7a/Wnt7b-Specific Signaling in Mammalian CNS Angiogenesis and Blood-Brain  
867 Barrier Regulation. *Neuron* **95**:1056–1073.e5. doi:10.1016/j.neuron.2017.07.031
- 868 Clevers H, Loh KM, Nusse R. 2014. Stem cell signaling. An integral program for tissue renewal  
869 and regeneration: Wnt signaling and stem cell control. *Science* **346**:1248012.  
870 doi:10.1126/science.1248012
- 871 Corada M, Orsenigo F, Bhat GP, Conze LL, Breviario F, Cunha SI, Claesson-welsh L,  
872 Beznoussenko G V, Mironov AA, Bacigaluppi M, Martino G, Pitulescu ME, Adams RH,  
873 Magnusson P, Dejana E. 2018. Fine-Tuning of Sox17 and Canonical Wnt Coordinates the  
874 Permeability Properties of the Blood-Brain Barrier 511–525.  
875 doi:10.1161/CIRCRESAHA.118.313316
- 876 Cullen M, Elzarrad MK, Seaman S, Zudaire E, Stevens J, Yang MY, Li X, Chaudhary A, Xu L,  
877 Hilton MB, Logsdon D, Hsiao E, Stein E V., Cuttitta F, Haines DC, Nagashima K,  
878 Tessarollo L, St. Croix B. 2011. GPR124, an orphan G protein-coupled receptor, is required  
879 for CNS-specific vascularization and establishment of the blood-brain barrier. *Proc Natl*  
880 *Acad Sci* **108**:5759–5764. doi:10.1073/pnas.1017192108
- 881 Daneman R, Agalliu D, Zhou L, Kuhnert F, Kuo CJ, Barres BA. 2009. Wnt/beta-catenin  
882 signaling is required for CNS, but not non-CNS, angiogenesis. *Proc Natl Acad Sci U S A*  
883 **106**:641–6. doi:10.1073/pnas.0805165106
- 884 Daneman R, Engelhardt B. 2017. Brain barriers in health and disease. *Neurobiol Dis* **107**:1–3.  
885 doi:10.1016/j.nbd.2017.05.008
- 886 Daneman R, Zhou L, Agalliu D, Cahoy JD, Kaushal A, Barres BA. 2010a. The Mouse Blood-  
887 Brain Barrier Transcriptome: A New Resource for Understanding the Development and  
888 Function of Brain Endothelial Cells. *PLoS One* **5**:e13741.  
889 doi:10.1371/journal.pone.0013741

- 890 Daneman R, Zhou L, Kebede AA, Barres BA. 2010b. Pericytes are required for blood–brain  
891 barrier integrity during embryogenesis. *Nature* **468**:562–566. doi:10.1038/nature09513
- 892 Delsing L, Dönnés P, Sánchez J, Clausen M, Voulgaris D, Falk A, Herland A, Brolén G,  
893 Zetterberg H, Hicks R, Synnergren J. 2018. Barrier Properties and Transcriptome  
894 Expression in Human iPSC-Derived Models of the Blood–Brain Barrier. *Stem Cells*  
895 **36**:1816–1827. doi:10.1002/stem.2908
- 896 Durinck S, Spellman PT, Birney E, Huber W. 2009. Mapping identifiers for the integration of  
897 genomic datasets with the R/ Bioconductor package biomaRt. *Nat Protoc* **4**:1184–1191.  
898 doi:10.1038/nprot.2009.97
- 899 Ebert AD, Shelley BC, Hurley AM, Onorati M, Castiglioni V, Patitucci TN, Svendsen SP, Mattis  
900 VB, McGivern J V., Schwab AJ, Sareen D, Kim HW, Cattaneo E, Svendsen CN. 2013. EZ  
901 spheres: A stable and expandable culture system for the generation of pre-rosette  
902 multipotent stem cells from human ESCs and iPSCs. *Stem Cell Res* **10**:417–427.  
903 doi:10.1016/j.scr.2013.01.009
- 904 Engelhardt B, Liebner S. 2014. Novel insights into the development and maintenance of the  
905 blood-brain barrier. *Cell Tissue Res*. doi:10.1007/s00441-014-1811-2
- 906 Eubelen M, Bostaille N, Cabochette P, Gauquier A, Tebabi P, Dumitru AC, Koehler M, Gut P,  
907 Alsteens D, Stainier DYR, Garcia-Pino A, Vanhollebeke B. 2018. A molecular mechanism  
908 for Wnt ligand-specific signaling. *Science (80- )* **361**. doi:10.1126/science.aat1178
- 909 Gastfriend BD, Foreman KL, Katt ME, Palecek SP, Shusta E V. 2021. Integrative analysis of the  
910 human brain mural cell transcriptome. *J Cereb Blood Flow Metab* **In press**.
- 911 Guérit S, Fidan E, Macas J, Czupalla CJ, Figueiredo R, Vijikumar A, Yalcin BH, Thom S,  
912 Winter P, Gerhardt H, Devraj K, Liebner S. 2021. Astrocyte-derived Wnt growth factors are  
913 required for endothelial blood-brain barrier maintenance. *Prog Neurobiol* **199**.  
914 doi:10.1016/j.pneurobio.2020.101937
- 915 Han X, Zhou Z, Fei L, Sun H, Wang R, Chen Y, Chen H, Wang J, Tang H, Ge W, Zhou Y, Ye F,  
916 Jiang M, Wu J, Xiao Y, Jia X, Zhang T, Ma X, Zhang Q, Bai X, Lai S, Yu C, Zhu L, Lin R,  
917 Gao Y, Wang M, Wu Y, Zhang J, Zhan R, Zhu S, Hu H, Wang C, Chen M, Huang H, Liang  
918 T, Chen J, Wang W, Zhang D, Guo G. 2020. Construction of a human cell landscape at  
919 single-cell level, *Nature*. Springer US. doi:10.1038/s41586-020-2157-4
- 920 Harada N, Tamai Y, Ishikawa TO, Sauer B, Takaku K, Oshima M, Taketo MM. 1999. Intestinal  
921 polyposis in mice with a dominant stable mutation of the  $\beta$ -catenin gene. *EMBO J* **18**:5931–  
922 5942. doi:10.1093/emboj/18.21.5931
- 923 He L, Vanlandewijck M, Mäe MA, Andrae J, Ando K, Del Gaudio F, Nahar K, Lebouvier T,  
924 Laviña B, Gouveia L, Sun Y, Raschperger E, Segerstolpe Å, Liu J, Gustafsson S, Räsänen  
925 M, Zarb Y, Mochizuki N, Keller A, Lendahl U, Betsholtz C. 2018. Single-cell RNA  
926 sequencing of mouse brain and lung vascular and vessel-associated cell types. *Sci data*  
927 **5**:180160. doi:10.1038/sdata.2018.160



- 928 Herrnberger L, Seitz R, Kuespert S, Bösl MR, Fuchshofer R, Tamm ER. 2012. Lack of  
929 endothelial diaphragms in fenestrae and caveolae of mutant Plvap-deficient mice.  
930 *Histochem Cell Biol* **138**:709–724. doi:10.1007/s00418-012-0987-3
- 931 Jaffe RB, Yu J, Vodyanik MA, Smuga-Otto K, Antosiewicz-Bourget J, Frane JL, Tian S, Nie J,  
932 Jonsdottir GA, Ruotti V, Stewart R, Slukvin II, Thomson JA. 2008. Induced Pluripotent  
933 Stem Cell Lines Derived From Human Somatic Cells. *Obstet Gynecol Surv* **63**:154–155.  
934 doi:10.1097/01.ogx.0000305193.72586.39
- 935 Kim K-A, Kakitani M, Zhao J, Oshima T, Tang T, Binnerts M, Liu Y, Boyle B, Park E, Emtage  
936 P, Funk WD, Tomizuka K. 2005. Mitogenic influence of human R-spondin1 on the  
937 intestinal epithelium. *Science* **309**:1256–9. doi:10.1126/science.1112521
- 938 Kim K-A, Wagle M, Tran K, Zhan X, Dixon MA, Liu S, Gros D, Korver W, Yonkovich S,  
939 Tomasevic N, Binnerts M, Abo A. 2008. R-Spondin Family Members Regulate the Wnt  
940 Pathway by a Common Mechanism. *Mol Biol Cell* **19**:2588–2596. doi:10.1091/mbc.e08-02-  
941 0187
- 942 Koo BK, Spit M, Jordens I, Low TY, Stange DE, Van De Wetering M, Van Es JH, Mohammed  
943 S, Heck AJR, Maurice MM, Clevers H. 2012. Tumour suppressor RNF43 is a stem-cell E3  
944 ligase that induces endocytosis of Wnt receptors. *Nature* **488**:665–669.  
945 doi:10.1038/nature11308
- 946 Kreitzer FR, Salomonis N, Sheehan A, Huang M, Park JS, Spindler MJ, Lizarraga P, Weiss WA,  
947 So P, Conklin BR. 2013. A robust method to derive functional neural crest cells from  
948 human pluripotent stem cells. *Am J Stem Cells* **2**:119–31.
- 949 Kuhnert F, Mancuso MR, Shamloo A, Wang H-THT, Choksi V, Florek M, Su H, Fruttiger M,  
950 Young WL, Heilshorn SC, Kuo CJ. 2010. Essential regulation of CNS angiogenesis by the  
951 orphan G protein-coupled receptor GPR124. *Science (80- )* **330**:985–989.  
952 doi:10.1126/science.1196554
- 953 La Manno G, Gyllborg D, Codeluppi S, Nishimura K, Salto C, Zeisel A, Borm LE, Stott SRW,  
954 Toledo EM, Villaescusa JC, Lönnerberg P, Ryge J, Barker RA, Arenas E, Linnarsson S.  
955 2016. Molecular Diversity of Midbrain Development in Mouse, Human, and Stem Cells.  
956 *Cell* **167**:566-580.e19. doi:10.1016/j.cell.2016.09.027
- 957 Laksitorini MD, Yathindranath V, Xiong W, Hombach-Klonisch S, Miller DW. 2019.  
958 Modulation of Wnt/ $\beta$ -catenin signaling promotes blood-brain barrier phenotype in cultured  
959 brain endothelial cells. *Sci Rep* **9**:1–13. doi:10.1038/s41598-019-56075-w
- 960 Langmead B, Salzberg SL. 2012. Fast gapped-read alignment with Bowtie 2. *Nat Methods*  
961 **9**:357–359. doi:10.1038/nmeth.1923
- 962 Li B, Dewey CN. 2011. RSEM: accurate transcript quantification from RNA-Seq data with or  
963 without a reference genome. *BMC Bioinformatics* **12**:323.
- 964 Lian X, Bao X, Al-Ahmad A, Liu J, Wu Y, Dong W, Dunn KK, Shusta E V., Palecek SP. 2014.  
965 Efficient differentiation of human pluripotent stem cells to endothelial progenitors via

- 966 small-molecule activation of WNT signaling. *Stem Cell Reports* **3**:804–816.  
967 doi:10.1016/j.stemcr.2014.09.005
- 968 Lian X, Zhang J, Zhu K, Kamp TJ, Palecek SP. 2013. Insulin inhibits cardiac mesoderm, not  
969 mesendoderm, formation during cardiac differentiation of human pluripotent stem cells and  
970 modulation of canonical wnt signaling can rescue this inhibition. *Stem Cells* **31**:447–457.  
971 doi:10.1002/stem.1289
- 972 Liebner S, Corada M, Bangsow T, Babbage J, Taddei A, Czapalla CJ, Reis M, Felici A, Wolburg  
973 H, Fruttiger M, Taketo MM, Von Melchner H, Plate KH, Gerhardt H, Dejana E. 2008.  
974 Wnt/ $\beta$ -catenin signaling controls development of the blood - brain barrier. *J Cell Biol*  
975 **183**:409–417. doi:10.1083/jcb.200806024
- 976 Lim RG, Quan C, Reyes-Ortiz AM, Lutz SE, Kedaigle AJ, Gipson TA, Wu J, Vatine GD,  
977 Stocksdale J, Casale MS, Svendsen CN, Fraenkel E, Housman DE, Agalliu D, Thompson  
978 LM. 2017. Huntington’s Disease iPSC-Derived Brain Microvascular Endothelial Cells  
979 Reveal WNT-Mediated Angiogenic and Blood-Brain Barrier Deficits. *Cell Rep* **19**:1365–  
980 1377. doi:10.1016/j.celrep.2017.04.021
- 981 Lippmann ES, Azarin SM, Kay JE, Nessler RA, Wilson HK, Al-Ahmad A, Palecek SP, Shusta E  
982 V. 2012. Derivation of blood-brain barrier endothelial cells from human pluripotent stem  
983 cells. *Nat Biotechnol* **30**:783–791. doi:10.1038/nbt.2247
- 984 Lippmann ES, Azarin SM, Palecek SP, Shusta E V. 2020. Commentary on human pluripotent  
985 stem cell-based blood–brain barrier models. *Fluids Barriers CNS* **17**:4–9.  
986 doi:10.1186/s12987-020-00222-3
- 987 Lippmann ES, Estevez-Silva MC, Ashton RS. 2014. Defined human pluripotent stem cell culture  
988 enables highly efficient neuroepithelium derivation without small molecule inhibitors. *Stem*  
989 *Cells* **32**:1032–1042. doi:10.1002/stem.1622
- 990 Love MI, Huber W, Anders S. 2014. Moderated estimation of fold change and dispersion for  
991 RNA-seq data with DESeq2. *Genome Biol* **15**:550. doi:10.1186/s13059-014-0550-8
- 992 Lu TM, Houghton S, Magdeldin T, Barcia Durán JG, Minotti AP, Snead A, Sproul A, Nguyen  
993 DHT, Xiang J, Fine HA, Rosenwaks Z, Studer L, Rafii S, Agalliu D, Redmond D, Lis R.  
994 2021. Pluripotent stem cell-derived epithelium misidentified as brain microvascular  
995 endothelium requires ETS factors to acquire vascular fate. *Proc Natl Acad Sci U S A* **118**.  
996 doi:10.1073/pnas.2016950118
- 997 Mazzoni J, Smith JR, Shahriar S, Cutforth T, Ceja B, Agalliu D. 2017. The Wnt Inhibitor  
998 *Apcdd1* Coordinates Vascular Remodeling and Barrier Maturation of Retinal Blood  
999 Vessels. *Neuron* **96**:1055-1069.e6. doi:10.1016/j.neuron.2017.10.025
- 1000 Mouillesseaux KP, Wiley DS, Saunders LM, Wylie LA, Kushner EJ, Chong DC, Citrin KM,  
1001 Barber AT, Park Y, Kim JDJD, Samsa LA, Kim JDJD, Liu J, Jin SW, Bautch VL. 2016.  
1002 Notch regulates BMP responsiveness and lateral branching in vessel networks via SMAD6.  
1003 *Nat Commun* **7**:1–12. doi:10.1038/ncomms13247

- 1004 Munji RN, Soung AL, Weiner GA, Sohet F, Semple BD, Trivedi A, Gimlin K, Kotoda M, Korai  
1005 M, Aydin S, Batugal A, Cabangcala AC, Schupp PG, Oldham MC, Hashimoto T, Noble-  
1006 Haeusslein LJ, Daneman R. 2019. Profiling the mouse brain endothelial transcriptome in  
1007 health and disease models reveals a core blood–brain barrier dysfunction module. *Nat*  
1008 *Neurosci* **22**:1892–1902. doi:10.1038/s41593-019-0497-x
- 1009 Nishihara H, Gastfriend BD, Soldati S, Perriot S, Mathias A, Sano Y, Shimizu F, Gosselet F,  
1010 Kanda T, Palecek SP, Du Pasquier R, Shusta E V., Engelhardt B. 2020. Advancing human  
1011 induced pluripotent stem cell-derived blood-brain barrier models for studying immune cell  
1012 interactions. *FASEB J* **34**:16693–16715. doi:10.1096/fj.202001507RR
- 1013 Obermeier B, Daneman R, Ransohoff RM. 2013. Development, maintenance and disruption of  
1014 the blood-brain barrier. *Nat Med*. doi:10.1038/nm.3407
- 1015 Paolinelli R, Corada M, Ferrarini L, Devraj K, Artus C, Czupalla CJ, Rudini N, Maddaluno L,  
1016 Papa E, Engelhardt B, Couraud PO, Liebner S, Dejana E. 2013. Wnt Activation of  
1017 Immortalized Brain Endothelial Cells as a Tool for Generating a Standardized Model of the  
1018 Blood Brain Barrier In Vitro. *PLoS One* **8**. doi:10.1371/journal.pone.0070233
- 1019 Phoenix TN, Patmore DM, Boop S, Boulos N, Jacus MO, Patel YT, Roussel MF, Finkelstein D,  
1020 Goumnerova L, Perreault S, Wadhwa E, Cho YJ, Stewart CF, Gilbertson RJ. 2016.  
1021 Medulloblastoma Genotype Dictates Blood Brain Barrier Phenotype. *Cancer Cell* **29**:508–  
1022 522. doi:10.1016/j.ccell.2016.03.002
- 1023 Polioudakis D, de la Torre-Ubieta L, Langerman J, Elkins AG, Shi X, Stein JL, Vuong CK,  
1024 Nichterwitz S, Gevorgian M, Opland CK, Lu D, Connell W, Ruzzo EK, Lowe JK, Hadzic  
1025 T, Hinz FI, Sabri S, Lowry WE, Gerstein MB, Plath K, Geschwind DH. 2019. A Single-  
1026 Cell Transcriptomic Atlas of Human Neocortical Development during Mid-gestation.  
1027 *Neuron* **103**:785–801.e8. doi:10.1016/j.neuron.2019.06.011
- 1028 Praça C, Rosa SC, Sevin E, Cecchelli R, Dehouck M-PP, Ferreira LS. 2019. Derivation of Brain  
1029 Capillary-like Endothelial Cells from Human Pluripotent Stem Cell-Derived Endothelial  
1030 Progenitor Cells. *Stem Cell Reports* **13**:599–611. doi:10.1016/j.stemcr.2019.08.002
- 1031 Profaci CP, Munji RN, Pulido RS, Daneman R. 2020. The blood-brain barrier in health and  
1032 disease: Important unanswered questions. *J Exp Med* **217**:1–16. doi:10.1084/jem.20190062
- 1033 Qian T, Maguire SE, Canfield SG, Bao X, Olson WR, Shusta E V, Palecek SP. 2017. Directed  
1034 differentiation of human pluripotent stem cells to blood-brain barrier endothelial cells. *Sci*  
1035 *Adv* **3**:e1701679. doi:10.1126/sciadv.1701679
- 1036 Reese TS, Karnovsky MJ. 1967. Fine structural localization of a blood-brain barrier to  
1037 exogenous peroxidase. *J Cell Biol* **34**:207–217. doi:10.1083/jcb.34.1.207
- 1038 Roudnicky F, Kim BK, Lan Y, Schmucki R, Küppers V, Christensen K, Graf M, Patsch C,  
1039 Burcin M, Meyer CA, Westenskow PD, Cowan CA. 2020a. Identification of a combination  
1040 of transcription factors that synergistically increases endothelial cell barrier resistance. *Sci*  
1041 *Rep* **10**:1–9. doi:10.1038/s41598-020-60688-x

- 1042 Roudnicky F, Zhang JD, Kim BK, Pandya NJ, Lan Y, Sach-Peltason L, Ragelle H, Strassburger  
1043 P, Gruener S, Lazendic M, Uhles S, Revelant F, Eidam O, Sturm G, Kueppers V,  
1044 Christensen K, Goldstein LD, Tzouros M, Banfai B, Modrusan Z, Graf M, Patsch C, Burcin  
1045 M, Meyer CA, Westenskow PD, Cowan CA. 2020b. Inducers of the endothelial cell barrier  
1046 identified through chemogenomic screening in genome-edited hPSC-endothelial cells. *Proc*  
1047 *Natl Acad Sci U S A* **117**:19854–19865. doi:10.1073/PNAS.1911532117
- 1048 Sabbagh MF, Heng JS, Luo C, Castanon RG, Nery JR, Rattner A, Goff LA, Ecker JR, Nathans J.  
1049 2018. Transcriptional and epigenomic landscapes of CNS and non-CNS vascular  
1050 endothelial cells. *Elife* **7**:1–44. doi:10.7554/eLife.36187
- 1051 Sabbagh MF, Nathans J. 2020. A genome-wide view of the de-differentiation of central nervous  
1052 system endothelial cells in culture. *Elife* **9**:1–19. doi:10.7554/eLife.51276
- 1053 Sareen D, Gowing G, Sahabian A, Staggenborg K, Paradis R, Avalos P, Latter J, Ornelas L,  
1054 Garcia L, Svendsen CN. 2014. Human induced pluripotent stem cells are a novel source of  
1055 neural progenitor cells (iNPCs) that migrate and integrate in the rodent spinal cord. *J Comp*  
1056 *Neurol* **522**:2707–2728. doi:10.1002/cne.23578
- 1057 Schindelin J, Arganda-carreras I, Frise E, Kaynig V, Longair M, Pietzsch T, Preibisch S, Rueden  
1058 C, Saalfeld S, Schmid B, Tinevez J, White DJ, Hartenstein V, Eliceiri K, Tomancak P,  
1059 Cardona A. 2019. Fiji : an open-source platform for biological-image analysis **9**.  
1060 doi:10.1038/nmeth.2019
- 1061 Shang Z, Chen D, Wang Q, Wang SSSSS, Deng Q, Wu L, Liu C, Ding X, Wang SSSSS, Zhong  
1062 J, Zhang D, Cai X, Zhu S, Yang H, Liu L, Fink JL, Chen F, Liu X, Gao Z, Xu X. 2018.  
1063 Single-cell RNA-seq reveals dynamic transcriptome profiling in human early neural  
1064 differentiation. *Gigascience* **7**:1–19. doi:10.1093/gigascience/giy117
- 1065 Sohet F, Lin C, Munji RN, Lee SY, Ruderisch N, Soung A, Arnold TD, Derugin N, Vexler ZS,  
1066 Yen FT, Daneman R. 2015. LSR/angulin-1 is a tricellular tight junction protein involved in  
1067 blood–brain barrier formation. *J Cell Biol* **208**:703–711. doi:10.1083/jcb.201410131
- 1068 Song HW, Foreman KL, Gastfriend BD, Kuo JS, Palecek SP, Shusta E V. 2020. Transcriptomic  
1069 comparison of human and mouse brain microvessels. *Sci Rep* **10**:12358.  
1070 doi:10.1038/s41598-020-69096-7
- 1071 Stebbins MJ, Gastfriend BD, Canfield SG, Lee M-SS, Richards D, Faubion MG, Li W-JJ,  
1072 Daneman R, Palecek SP, Shusta E V. 2019. Human pluripotent stem cell–derived brain  
1073 pericyte–like cells induce blood-brain barrier properties. *Sci Adv* **5**:eaau7375.  
1074 doi:10.1126/sciadv.aau7375
- 1075 Stenman JM, Rajagopal J, Carroll TJ, Ishibashi M, McMahon J, McMahon AP. 2008. Canonical  
1076 Wnt Signaling Regulates Organ-Specific Assembly and Differentiation of CNS  
1077 Vasculature. *Science (80- )* **322**:1247–1250. doi:10.1126/science.1164594
- 1078 Syvänen S, Lindhe Ö, Palner M, Kornum BR, Rahman O, Långström B, Knudsen GM,  
1079 Hammarlund-Udenaes M, Lindhe O, Palner M, Kornum BR, Rahman O, Långström B,  
1080 Knudsen GM, Hammarlund-Udenaes M. 2009. Species differences in blood-brain barrier

- 1081 transport of three positron emission tomography radioligands with emphasis on P-  
1082 glycoprotein transport. *Drug Metab Dispos* **37**:635–643. doi:10.1124/dmd.108.024745
- 1083 Tran KA, Zhang X, Predescu D, Huang X, MacHado RF, Göthert JR, Malik AB, Valyi-Nagy T,  
1084 Zhao Y-YY. 2016. Endothelial  $\beta$ -Catenin Signaling Is Required for Maintaining Adult  
1085 Blood-Brain Barrier Integrity and Central Nervous System Homeostasis. *Circulation*  
1086 **133**:177–86. doi:10.1161/CIRCULATIONAHA.115.015982
- 1087 Uchida Y, Ohtsuki S, Katsukura Y, Ikeda C, Suzuki T, Kamiie J, Terasaki T. 2011. Quantitative  
1088 targeted absolute proteomics of human blood-brain barrier transporters and receptors. *J*  
1089 *Neurochem* **117**:333–345. doi:10.1111/j.1471-4159.2011.07208.x
- 1090 Umans RA, Henson HE, Mu F, Parupalli C, Ju B, Peters JL, Lanham KA, Plavicki JS, Taylor  
1091 MR. 2017. CNS angiogenesis and barrierogenesis occur simultaneously. *Dev Biol* **425**:101–  
1092 108. doi:10.1016/j.ydbio.2017.03.017
- 1093 Vallon M, Yuki K, Nguyen TD, Chang J, Yuan J, Siepe D, Miao Y, Essler M, Noda M, Garcia  
1094 KC, Kuo CJ. 2018. A RECK-WNT7 Receptor-Ligand Interaction Enables Isoform-Specific  
1095 Regulation of Wnt Bioavailability. *Cell Rep* **25**:339-349.e9.  
1096 doi:10.1016/j.celrep.2018.09.045
- 1097 Vanhollebeke B, Stone OA, Bostaille N, Cho C, Zhou Y, Maquet E, Gauquier A, Cabochette P,  
1098 Fukuhara S, Mochizuki N, Nathans J, Stainier DYR. 2015. Tip cell-specific requirement for  
1099 an atypical Gpr124- and Reck-dependent Wnt/ $\beta$ -catenin pathway during brain angiogenesis.  
1100 *Elife* **4**:1–25. doi:10.7554/eLife.06489
- 1101 Vanlandewijck M, He L, Mäe MA, Andrae J, Ando K, Del Gaudio F, Nahar K, Lebouvier T,  
1102 Laviña B, Gouveia L, Sun Y, Raschperger E, Räsänen M, Zarb Y, Mochizuki N, Keller A,  
1103 Lendahl U, Betsholtz C. 2018. A molecular atlas of cell types and zonation in the brain  
1104 vasculature. *Nature* **554**:475–480. doi:10.1038/nature25739
- 1105 Vatine GD, Al-Ahmad A, Barriga BK, Svendsen S, Salim A, Garcia L, Garcia VJ, Ho R, Yucer  
1106 N, Qian T, Lim RG, Wu J, Thompson LM, Spivia WR, Chen Z, Van Eyk J, Palecek SP,  
1107 Refetoff S, Shusta E V, Svendsen CN. 2016. Modeling Psychomotor Retardation using  
1108 iPSCs from MCT8-Deficient Patients Indicates a Prominent Role for the Blood-Brain  
1109 Barrier. *Cell Stem Cell* 1–13. doi:10.1016/j.stem.2017.04.002
- 1110 Vatine GD, Barrile R, Workman MJ, Chen Z, Eyk J Van, Svendsen CN, Vatine GD, Barrile R,  
1111 Workman MJ, Sances S, Barriga BK, Spivia WR, Chen Z, Eyk J Van, Svendsen CN. 2019.  
1112 Human iPSC-Derived Blood-Brain Barrier Chips Resource Chips Enable Disease Modeling  
1113 and Personalized Medicine Applications. *Stem Cell* **24**:995-1005.e6.  
1114 doi:10.1016/j.stem.2019.05.011
- 1115 Wang Y, Rattner A, Zhou Y, Williams J, Smallwood PM, Nathans J. 2012. Norrin/Frizzled4  
1116 signaling in retinal vascular development and blood brain barrier plasticity. *Cell* **151**:1332–  
1117 1344. doi:10.1016/j.cell.2012.10.042
- 1118 Wang Y, Sabbagh MF, Gu X, Rattner A, Williams J, Nathans J. 2019. Beta-catenin signaling  
1119 regulates barrier- specific gene expression in circumventricular organ and ocular

- 1120 vasculatures. *Elife* **8**:1–36. doi:10.7554/eLife.43257
- 1121 Workman MJ, Svendsen CN. 2020. Recent advances in human iPSC-derived models of the  
1122 blood-brain barrier. *Fluids Barriers CNS* **17**:1–10. doi:10.1186/s12987-020-00191-7
- 1123 Yates AD, Achuthan P, Akanni W, Allen JJJ, Allen JJJ, Alvarez-Jarreta J, Amode MR, Armean  
1124 IM, Azov AG, Bennett R, Bhai J, Billis K, Boddu S, Marugán JC, Cummins C, Davidson C,  
1125 Dodiya K, Fatima R, Gall A, Giron CG, Gil L, Grego T, Haggerty L, Haskell E, Hourlier T,  
1126 Izuogu OG, Janacek SH, Juettemann T, Kay M, Lavidas I, Le T, Lemos D, Martinez JG,  
1127 Maurel T, McDowall M, McMahan A, Mohanan S, Moore B, Nuhn M, Oheh DN, Parker  
1128 A, Parton A, Patricio M, Sakthivel MP, Abdul Salam AI, Schmitt BM, Schuilenburg H,  
1129 Sheppard D, Sycheva M, Szuba M, Taylor K, Thormann A, Threadgold G, Vullo A, Walts  
1130 B, Winterbottom A, Zadissa A, Chakiachvili M, Flint B, Frankish A, Hunt SE, Iisley G,  
1131 Kostadima M, Langridge N, Loveland JE, Martin FJ, Morales J, Mudge JM, Muffato M,  
1132 Perry E, Ruffier M, Trevanion SJ, Cunningham F, Howe KL, Zerbino DR, Flicek P. 2019.  
1133 Ensembl 2020. *Nucleic Acids Res* **48**:D682–D688. doi:10.1093/nar/gkz966
- 1134 Ye X, Wang Y, Cahill H, Yu M, Badea TC, Smallwood PM, Peachey NS, Nathans J. 2009.  
1135 Norrin, Frizzled-4, and Lrp5 Signaling in Endothelial Cells Controls a Genetic Program for  
1136 Retinal Vascularization. *Cell* **139**:285–298. doi:10.1016/j.cell.2009.07.047
- 1137 Zhong S, Ding W, Sun L, Lu Y, Dong H, Fan X, Liu Z, Chen R, Zhang S, Ma Q, Tang F, Wu Q,  
1138 Wang X. 2020. Decoding the development of the human hippocampus. *Nature* **577**:531–  
1139 536. doi:10.1038/s41586-019-1917-5
- 1140 Zhou Y, Wang Y, Tischfield M, Williams J, Smallwood PM, Rattner A, Taketo MM, Nathans J.  
1141 2014. Canonical WNT signaling components in vascular development and barrier  
1142 formation. *J Clin Invest* **124**:3825–3846. doi:10.1172/JCI76431
- 1143 Zhou Y, Williams J, Smallwood PM, Nathans J. 2015. Sox7, Sox17, and Sox18 cooperatively  
1144 regulate vascular development in the mouse retina. *PLoS One* **10**:1–22.  
1145 doi:10.1371/journal.pone.0143650
- 1146

## FIGURES AND FIGURE LEGENDS

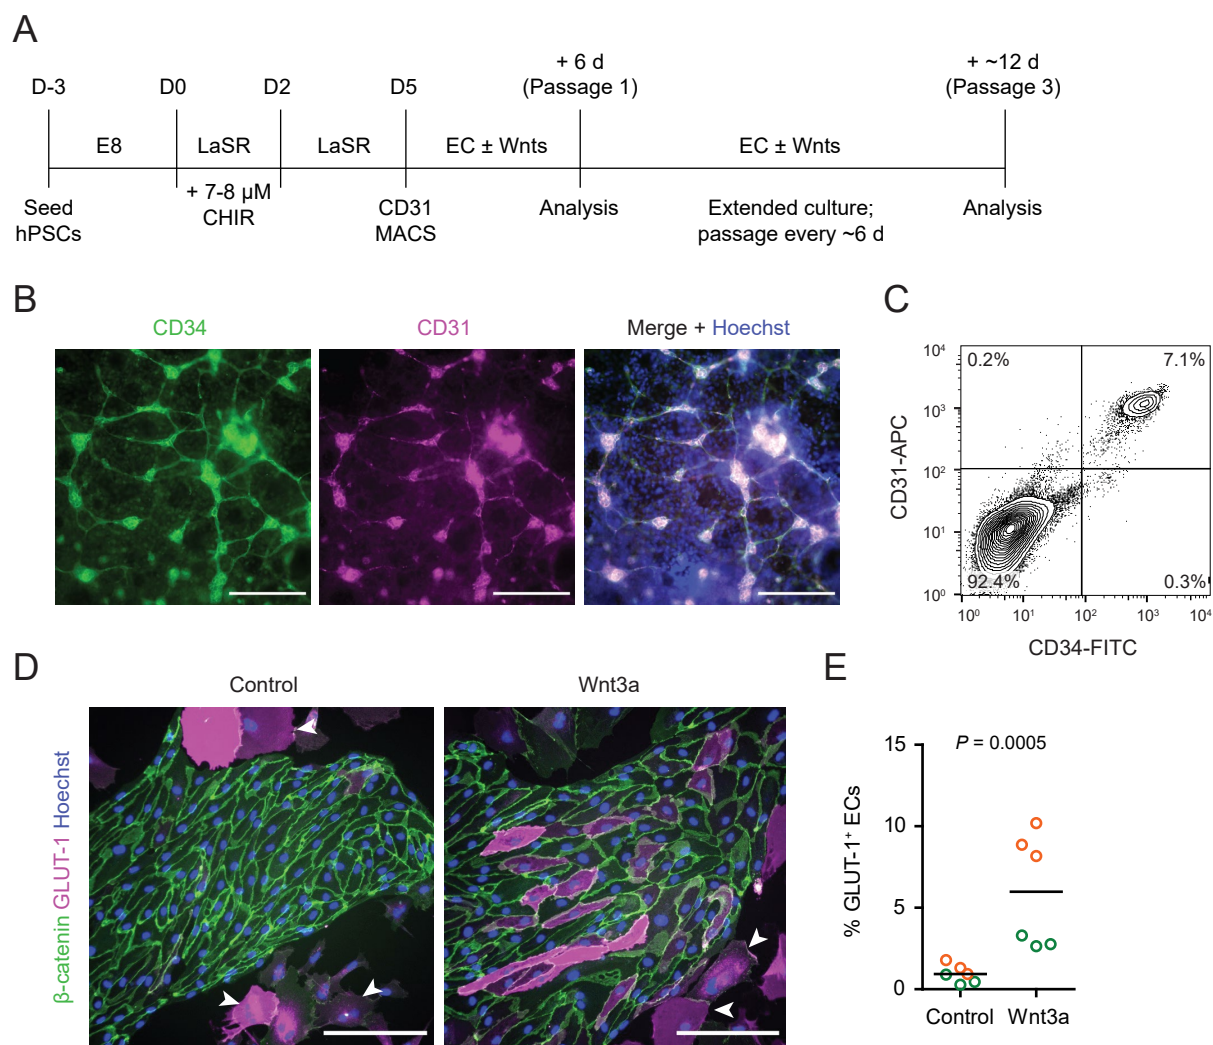

**Figure 1. hPSC-derived endothelial progenitors as a model for studying Wnt-mediated barrierogenesis.**

(A) Overview of the endothelial differentiation and Wnt treatment protocol. (B) Immunocytochemistry analysis of CD34 and CD31 expression in D5 EPCs prior to MACS. Hoechst nuclear counterstain is overlaid in the merged image. Scale bars: 200  $\mu$ m. (C) Flow cytometry analysis of CD34 and CD31 expression in D5 EPCs prior to MACS. (D) Immunocytochemistry analysis of  $\beta$ -catenin and GLUT-1 expression in Passage 1 ECs treated with Wnt3a or control. Hoechst nuclear counterstain is overlaid. Arrowheads indicate smooth muscle-like cells (SMLCs). Scale bars: 200  $\mu$ m. (E) Quantification of the percentage of GLUT-1<sup>+</sup> ECs in control- and Wnt3a-treated conditions. Points represent replicate wells from 2 independent differentiations of the IMR90-4

line, each differentiation indicated with a different color. Bars indicate mean values. P-value: Two-way

ANOVA.



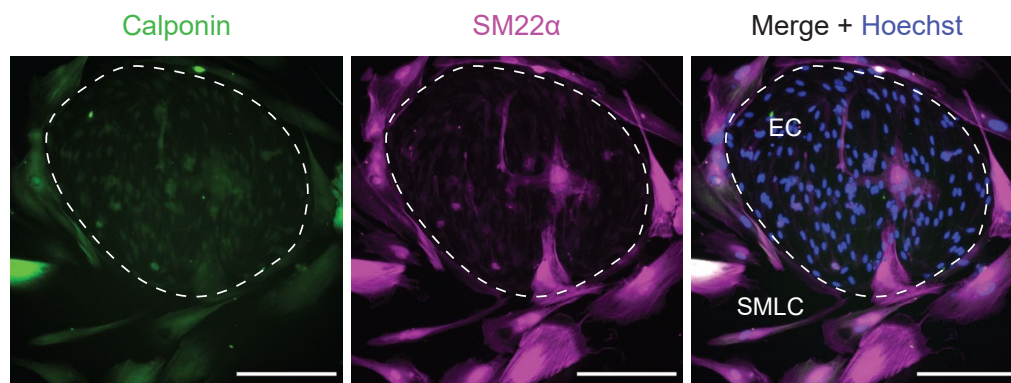

**Figure 1–figure supplement 1. Smooth-muscle like cells (SMLCs).** Immunocytochemistry analysis of calponin and smooth muscle protein 22- $\alpha$  (SM22 $\alpha$ ) in Passage 1 cultures containing ECs and SMLCs. Hoechst nuclear counterstain is overlaid in the merged image. Dashed area indicates an EC colony. Scale bars: 200  $\mu$ m.

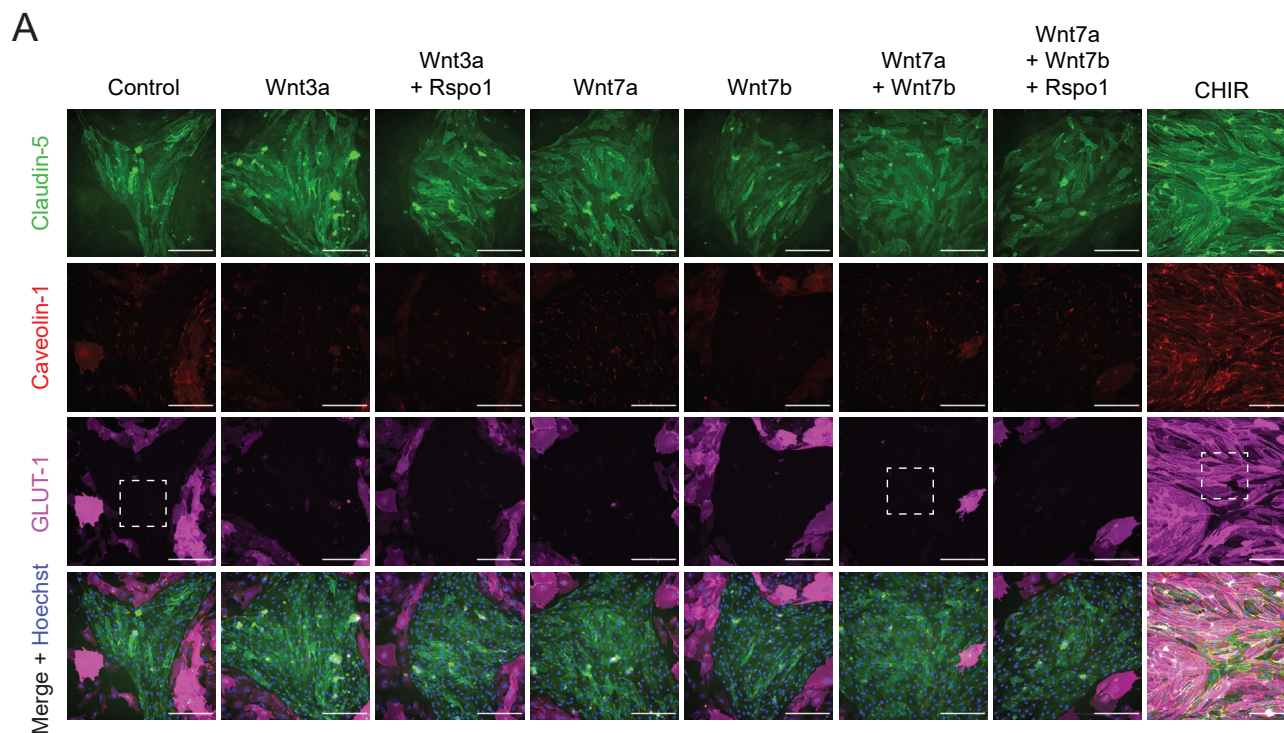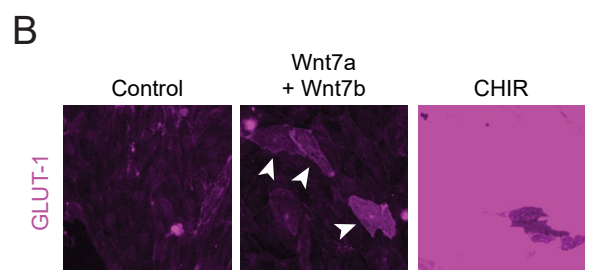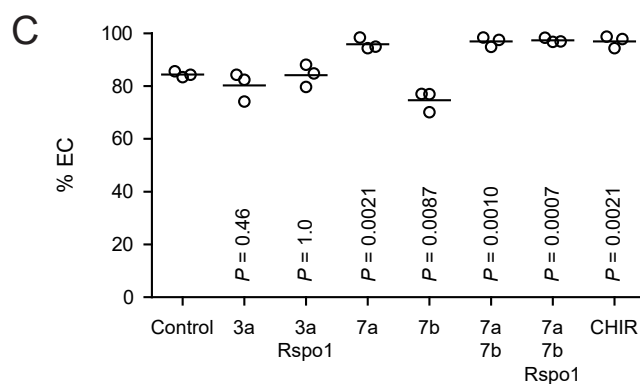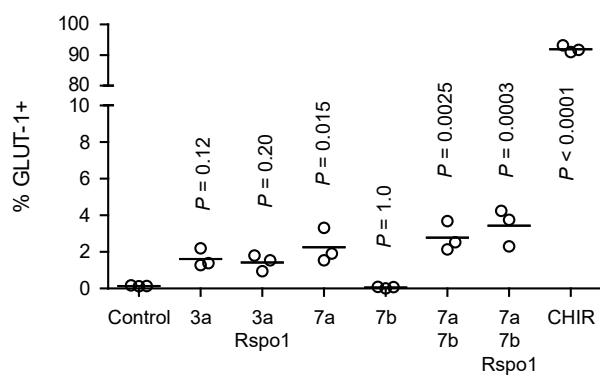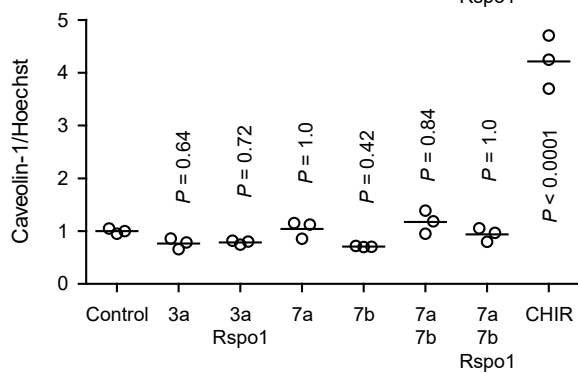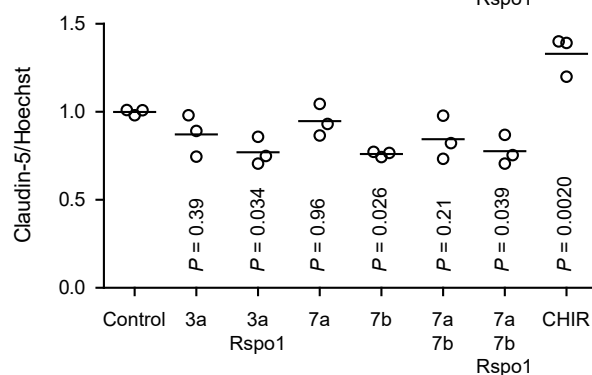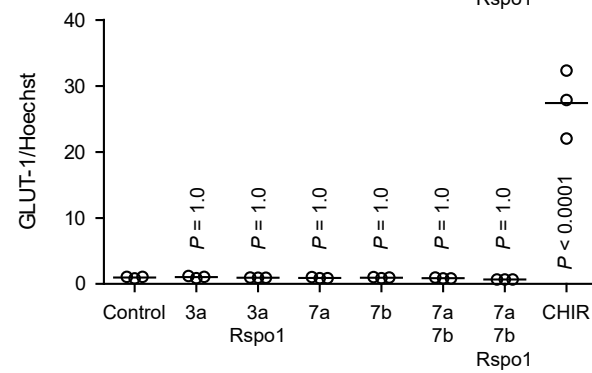

## Figure 2. Effect of Wnt ligands and pathway modulators on endothelial properties. (A)

Immunocytochemistry analysis of claudin-5, caveolin-1, and GLUT-1 expression in Passage 1 ECs treated with Wnt3a, Wnt3a + R-spondin 1 (Rspo1), Wnt7a, Wnt7b, Wnt7a + Wnt7b, Wnt7a + Wnt7b + Rspo1, CHIR, or control. Hoechst nuclear counterstain is overlaid in the merged images. Dashed boxes indicate fields displayed in (B). Scale bars: 200  $\mu$ m. **(B)** Immunocytochemistry analysis of GLUT-1 expression in the fields indicated with dashed boxes in (A) from the control and Wnt7a + Wnt7b conditions. To visualize weak GLUT-1 immunoreactivity in Wnt7a + Wnt7b-treated ECs, a linear brightness/contrast adjustment was applied identically to the three fields but differs from that of the images shown in (A). Arrowheads indicate GLUT-1<sup>+</sup> ECs. **(C)** Quantification of images from the conditions described in (A) for percentage of ECs (claudin-5<sup>+</sup> cells relative to total nuclei), GLUT-1<sup>+</sup> ECs (relative to total claudin-5<sup>+</sup> ECs), and mean fluorescence intensity of claudin-5, caveolin-1, and GLUT-1 normalized to Hoechst mean fluorescence intensity within the area of claudin-5<sup>+</sup> ECs only. Points represent replicate wells from one differentiation of the IMR90-4 line and bars indicate mean values. For the fluorescence intensity plots, values were normalized such that the mean of the control condition equals 1. P-values: ANOVA followed by Dunnett's test versus control.

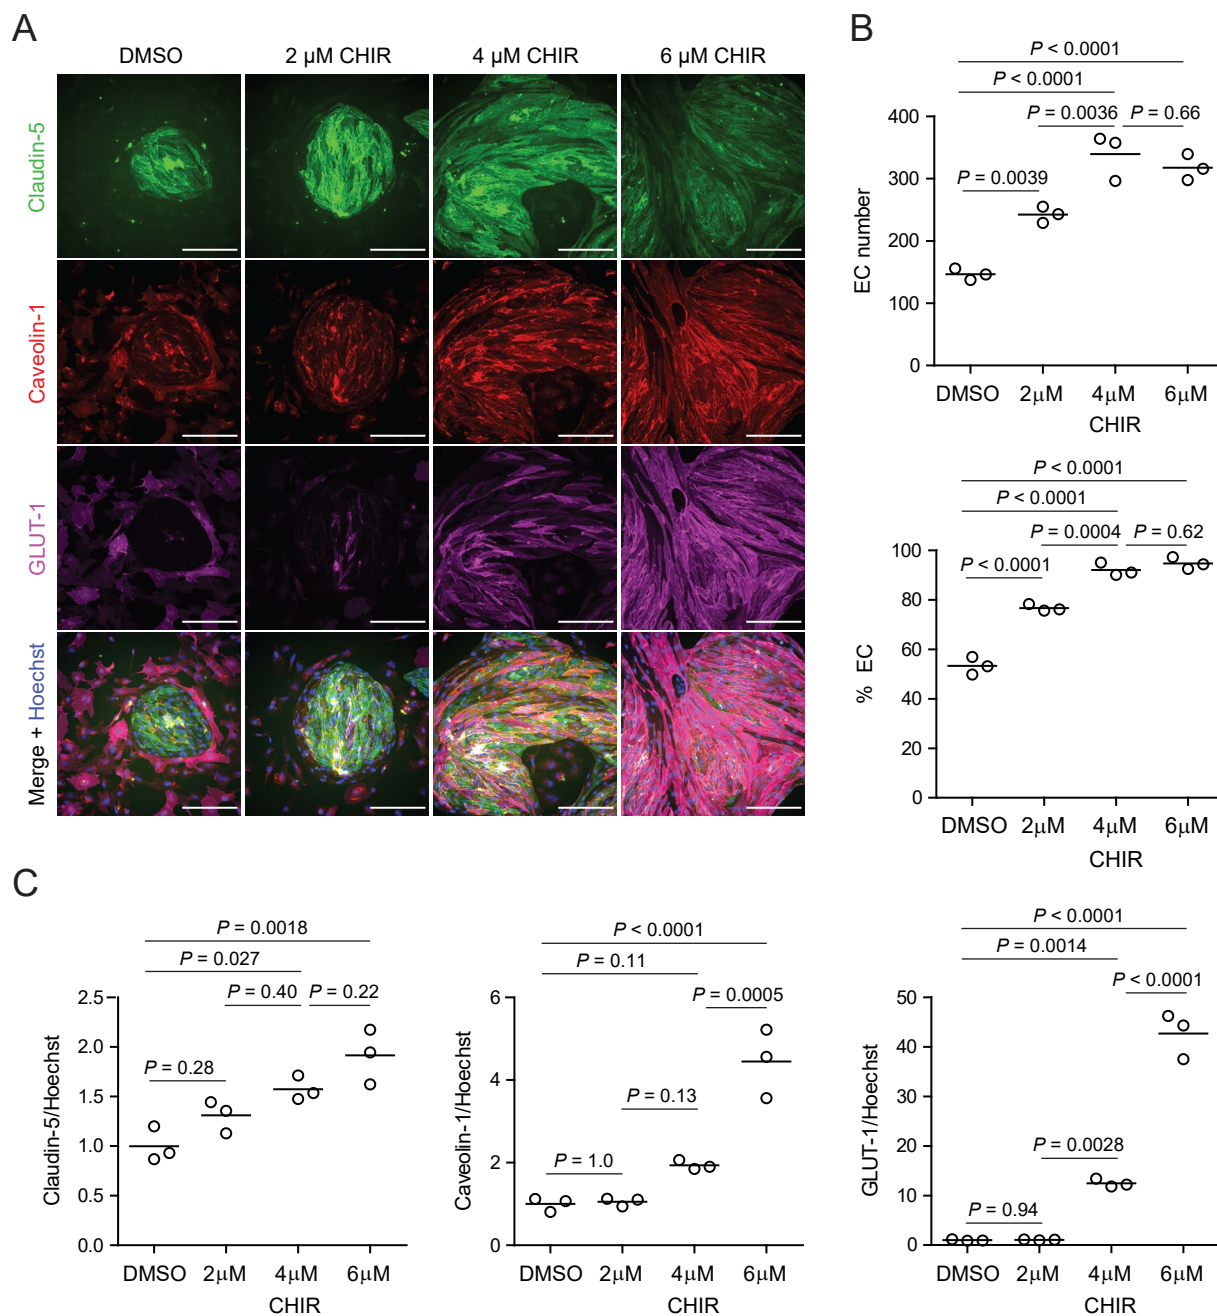

**Figure 2—figure supplement 1. Dose-dependent effects of CHIR on endothelial properties. (A)**

Immunocytochemistry analysis of claudin-5, caveolin-1, and GLUT-1 expression in Passage 1 ECs treated with 2  $\mu$ M, 4  $\mu$ M, or 6  $\mu$ M CHIR, or DMSO vehicle control. Hoechst nuclear counterstain is overlaid in the merged images. Scale bars: 200  $\mu$ m. **(B)** Quantification of images from the conditions described in (A) for number of ECs per 20 $\times$  field and percentage of ECs (claudin-5<sup>+</sup> cells relative to total nuclei). Points represent replicate wells from one differentiation of the IMR90-4 line and bars indicate mean values. P-values: ANOVA followed by Tukey's HSD test. **(C)** Quantification of claudin-5, caveolin-1, and GLUT-1 mean fluorescence intensity

normalized to Hoechst mean fluorescence intensity within the area of claudin-5<sup>+</sup> ECs only. Points represent replicate wells from one differentiation of the IMR90-4 line. Bars indicate mean values, with values normalized such that the mean of the DMSO condition equals 1. P-values: ANOVA followed by Tukey's HSD test.

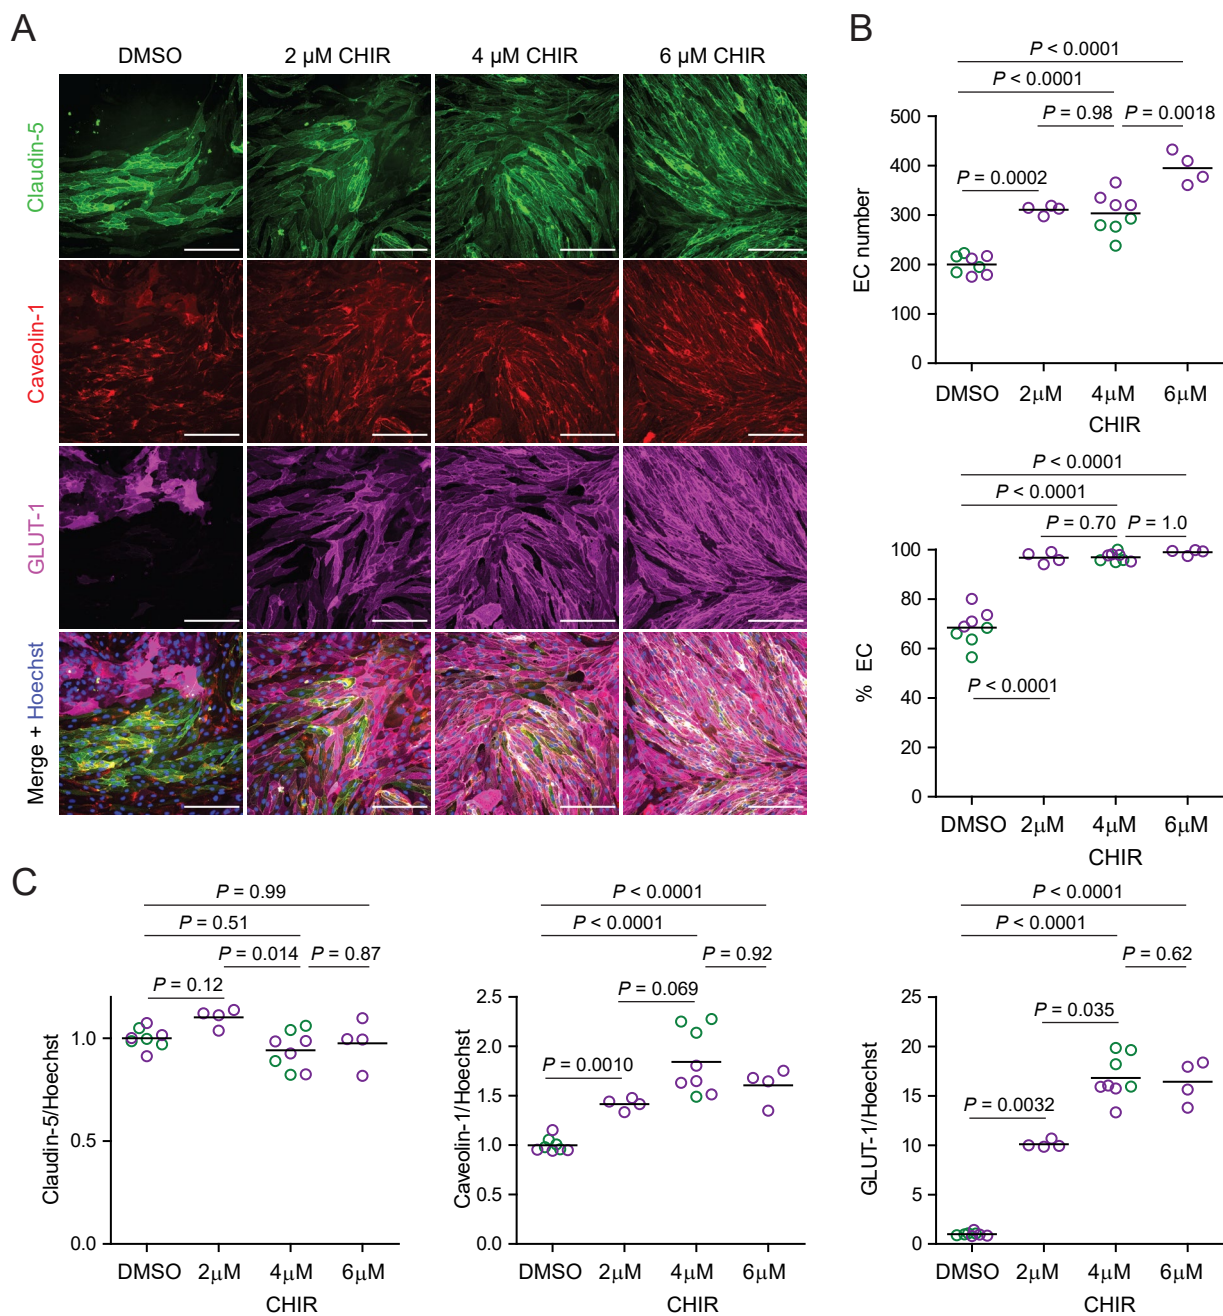

**Figure 2–figure supplement 2. CHIR-mediated effects in an additional hPSC line. (A)**

Immunocytochemistry analysis of claudin-5, caveolin-1, and GLUT-1 expression in Passage 1 ECs differentiated from the WTC11 iPSC line treated with 2  $\mu$ M, 4  $\mu$ M, or 6  $\mu$ M CHIR, or DMSO vehicle control. Hoechst nuclear counterstain is overlaid in the merged images. Scale bars: 200  $\mu$ m. **(B)** Quantification of images from the conditions described in (A) for number of ECs per 20 $\times$  field and percentage of ECs (claudin-5<sup>+</sup> cells relative to total nuclei). Points represent replicate wells from 1–2 differentiations of the WTC11 line and bars indicate mean values, each differentiation indicated with a different color. P-values: Two-way ANOVA

followed by Tukey's HSD test. **(C)** Quantification of claudin-5, caveolin-1, and GLUT-1 mean fluorescence intensity normalized to Hoechst mean fluorescence intensity within the area of claudin-5<sup>+</sup> ECs only. Points represent replicate wells from 1–2 differentiations of the WTC11 line, each differentiation indicated with a different color. Bars indicate mean values, with values normalized within each differentiation such that the mean of the DMSO condition equals 1. P-values: Two-way ANOVA followed by Tukey's HSD test on unnormalized data.

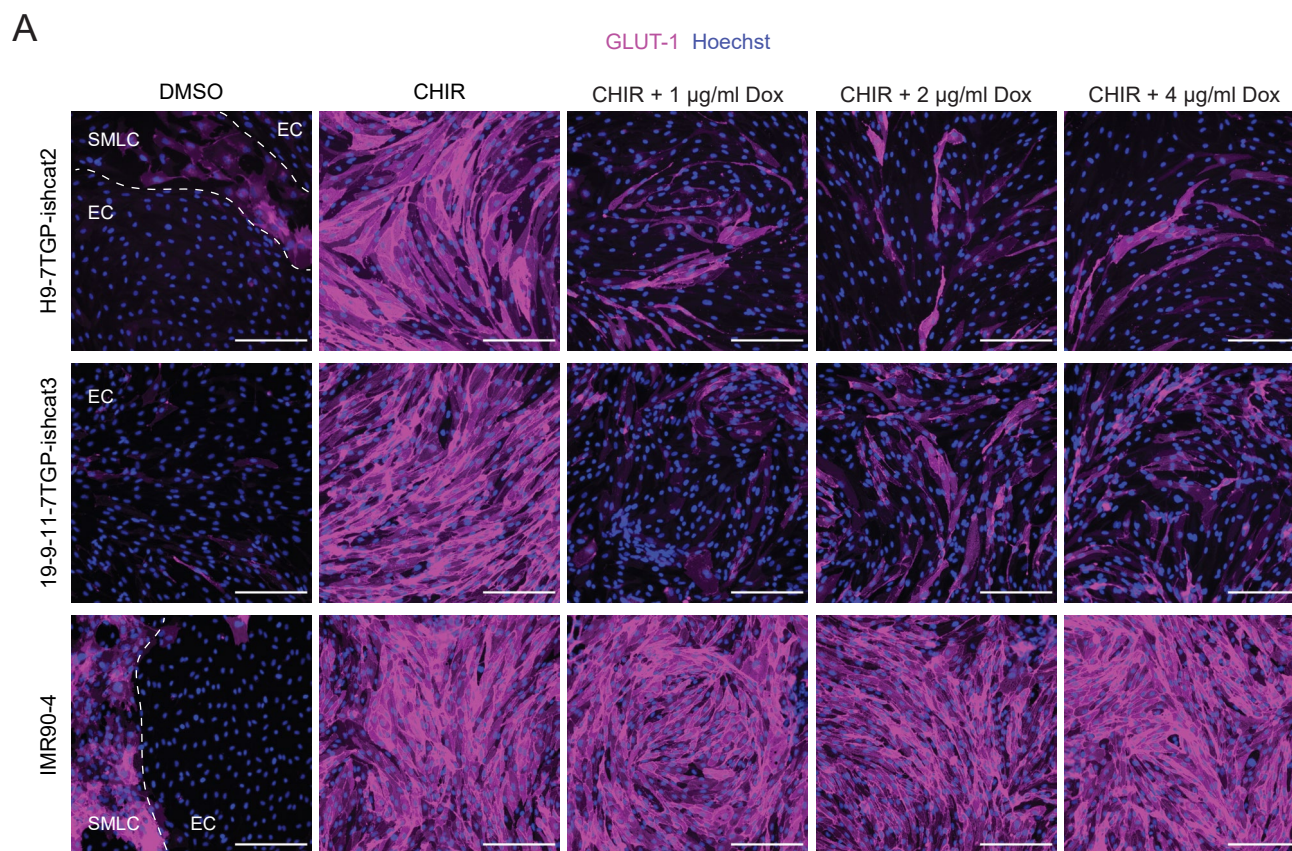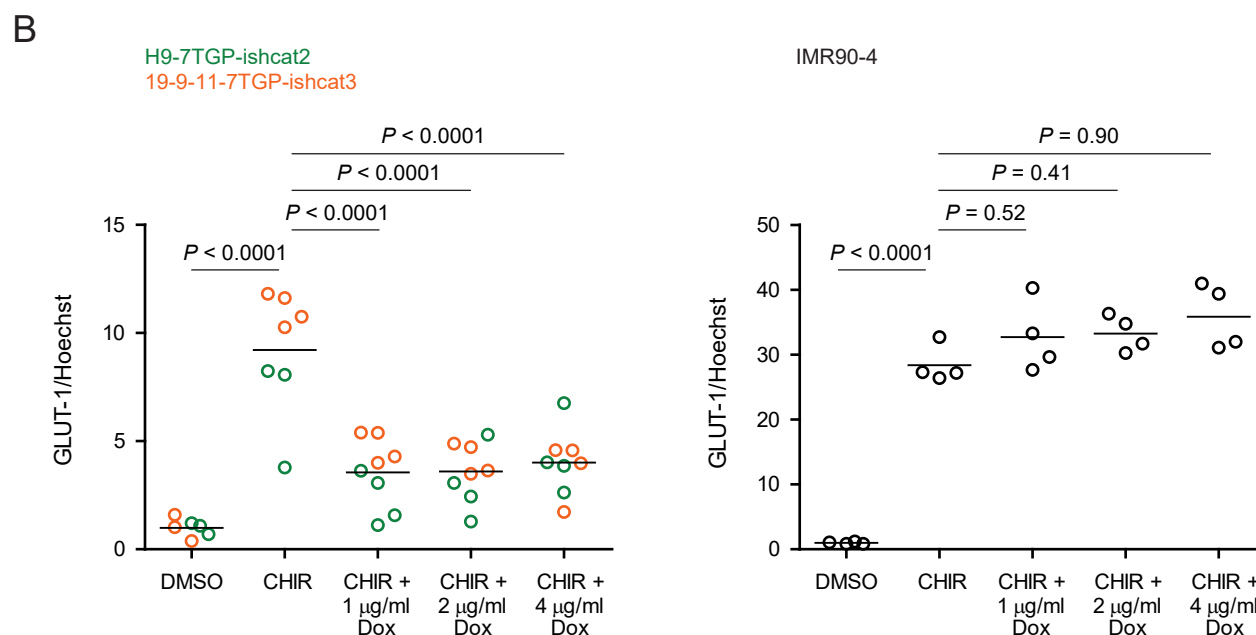

**Figure 2—figure supplement 3.  $\beta$ -catenin-dependence of CHIR-mediated GLUT-1 induction. (A)**

Immunocytochemistry analysis of GLUT-1 expression in Passage 1 ECs treated with DMSO, CHIR, or CHIR + doxycycline (Dox) at 1, 2, or 4  $\mu$ g/ml. Images from the H9-7TGP-ishcat2, 19-9-11-7TGP-ishcat3, and IMR90-4 lines are shown. Hoechst nuclear counterstain is overlaid. Dashed lines indicate borders between EC colonies



and SMLCs in the DMSO condition. Scale bars: 200  $\mu\text{m}$ . **(B)** Quantification of images from the conditions described in (A) for GLUT-1 mean fluorescence intensity normalized to Hoechst mean fluorescence intensity within the area of ECs only. At left, points represent replicate wells from one differentiation of the H9-7TGP-ishcat line (green) and one differentiation of the 19-9-11-7TGP-ishcat3 line (orange). Bars indicate mean values, with values normalized within each differentiation such that the mean of the DMSO condition equals 1. P-values: Two-way ANOVA followed by Tukey's HSD test on unnormalized data. At right, points represent replicate wells from one differentiation of the IMR90-4 line. Bars indicate mean values, with values normalized such that the mean of the DMSO condition equals 1. P-values: ANOVA followed by Tukey's HSD test.

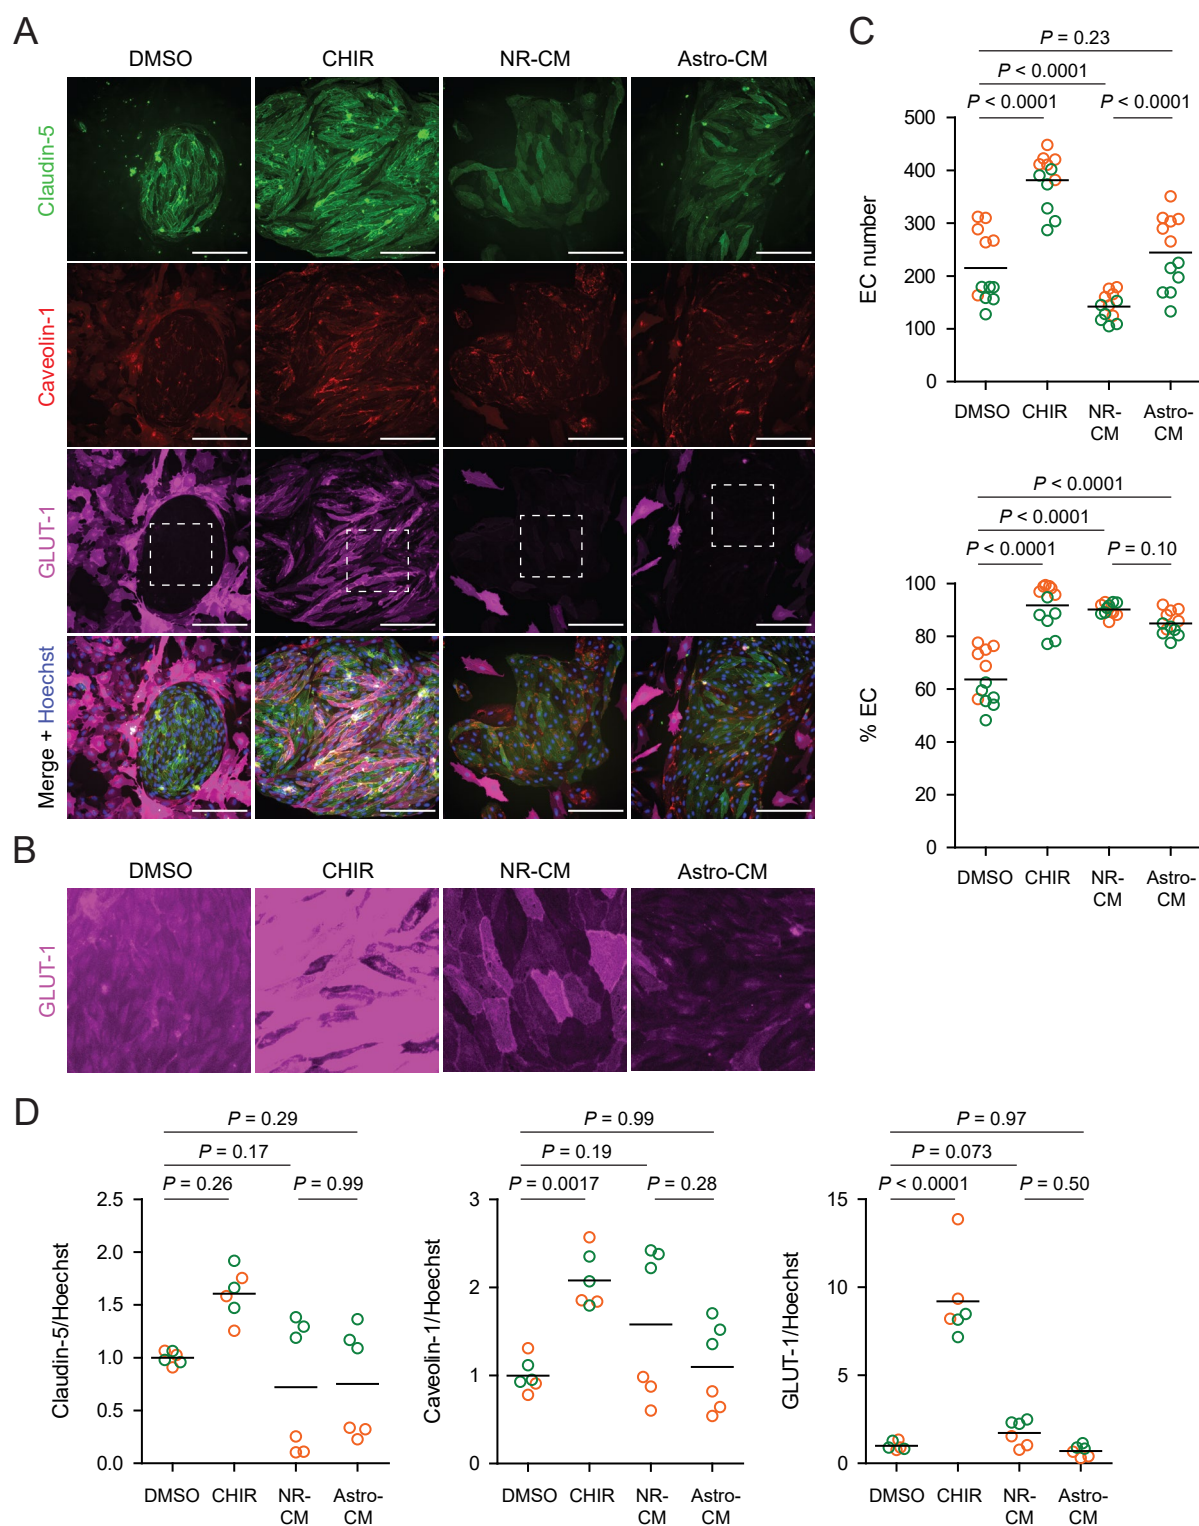

**Figure 3. Effect of neural rosette- and astrocyte-conditioned media on endothelial properties. (A)**

Immunocytochemistry analysis of claudin-5, caveolin-1, and GLUT-1 expression in Passage 1 ECs treated with DMSO, CHIR, neural rosette-conditioned medium (NR-CM), or astrocyte-conditioned medium (Astro-CM).

Hoechst nuclear counterstain is overlaid in the merged images. Dashed boxes indicate fields displayed in (B). Scale bars: 200  $\mu\text{m}$ . **(B)** Immunocytochemistry analysis of GLUT-1 expression in the fields indicated with dashed boxes in (A). A linear brightness/contrast adjustment was applied identically to the four fields but differs from that of the images shown in (A). **(C)** Quantification of images from the conditions described in (A) for number of ECs per  $20\times$  field and percentage of ECs (claudin-5<sup>+</sup> cells relative to total nuclei). Points represent replicate wells from two independent differentiations of the IMR90-4 line, each differentiation indicated with a different color. Bars indicate mean values. P-values: Two-way ANOVA followed by Tukey's HSD test. **(D)** Quantification of claudin-5, caveolin-1, and GLUT-1 mean fluorescence intensity normalized to Hoechst mean fluorescence intensity within the area of claudin-5<sup>+</sup> ECs only. Points represent replicate wells from two independent differentiations of the IMR90-4 line, each differentiation indicated with a different color. Bars indicate mean values, with values normalized within each differentiation such that the mean of the DMSO condition equals 1. P-values: Two-way ANOVA followed by Tukey's HSD test on unnormalized data.

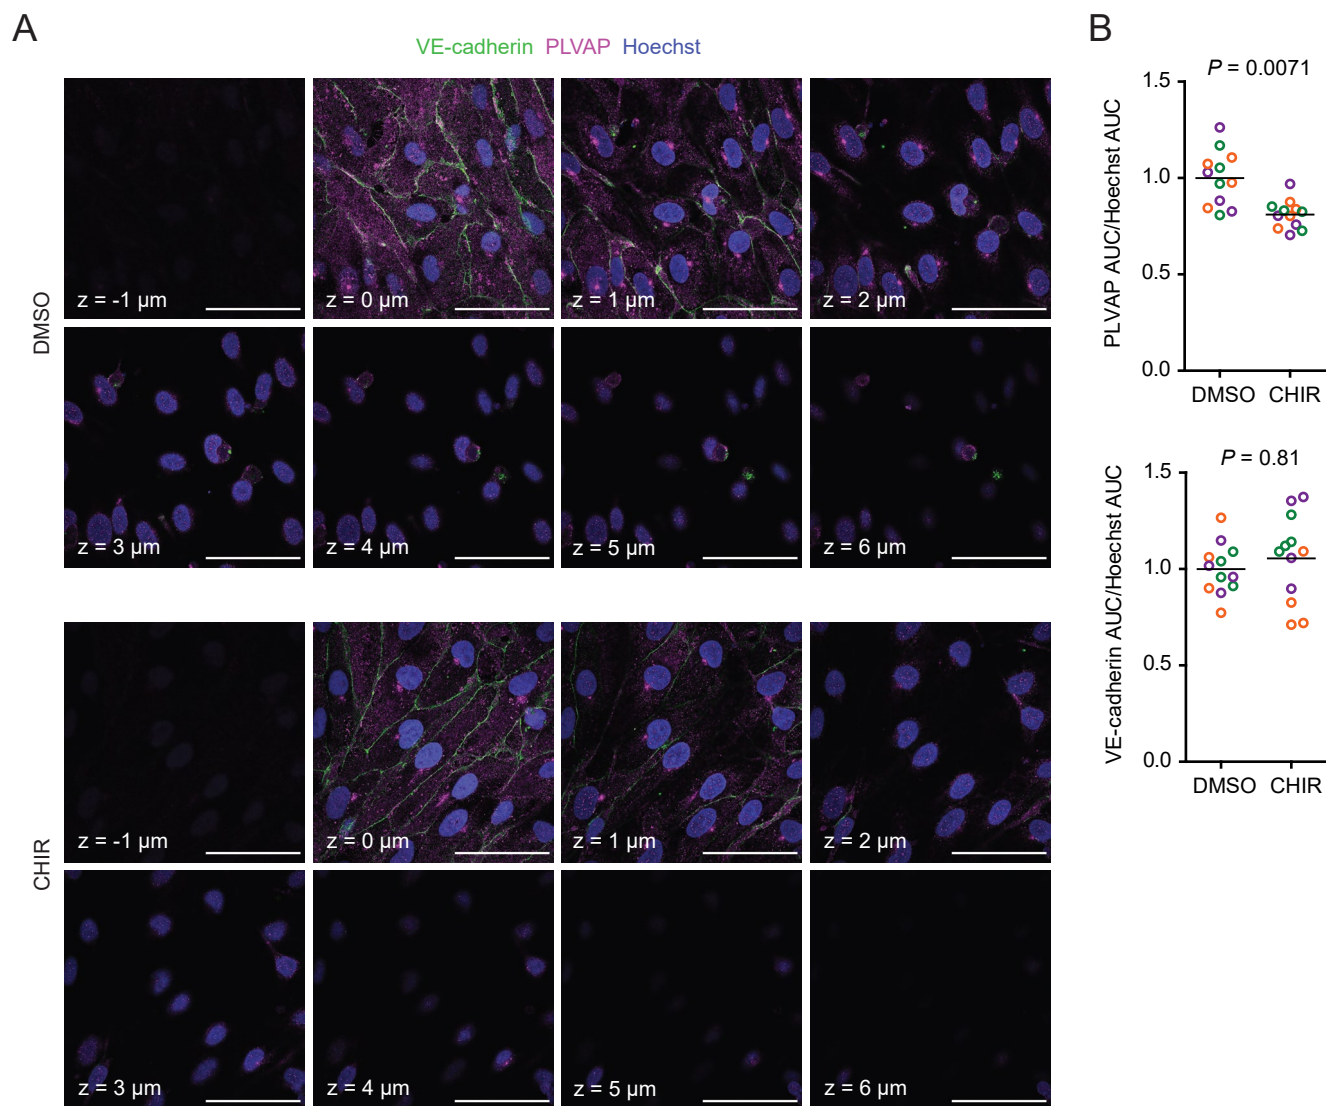

**Figure 4. Effect of CHIR on endothelial PLVAP expression. (A)** Confocal immunocytochemistry analysis of VE-cadherin and PLVAP expression in Passage 1 ECs treated with DMSO or CHIR. Hoechst nuclear counterstain is overlaid. Eight serial confocal Z-slices with 1  $\mu\text{m}$  spacing are shown. Scale bars: 50  $\mu\text{m}$ . **(B)** Quantification of PLVAP and VE-cadherin area under the curve (AUC) of mean fluorescence intensity versus Z-position normalized to Hoechst AUC. Points represent replicate wells from 3 independent differentiations of the IMR90-4 line, each differentiation indicated with a different color. Bars indicate mean values, with values normalized within each differentiation such that the mean of the DMSO condition equals 1. P-values: Two-way ANOVA on unnormalized data.

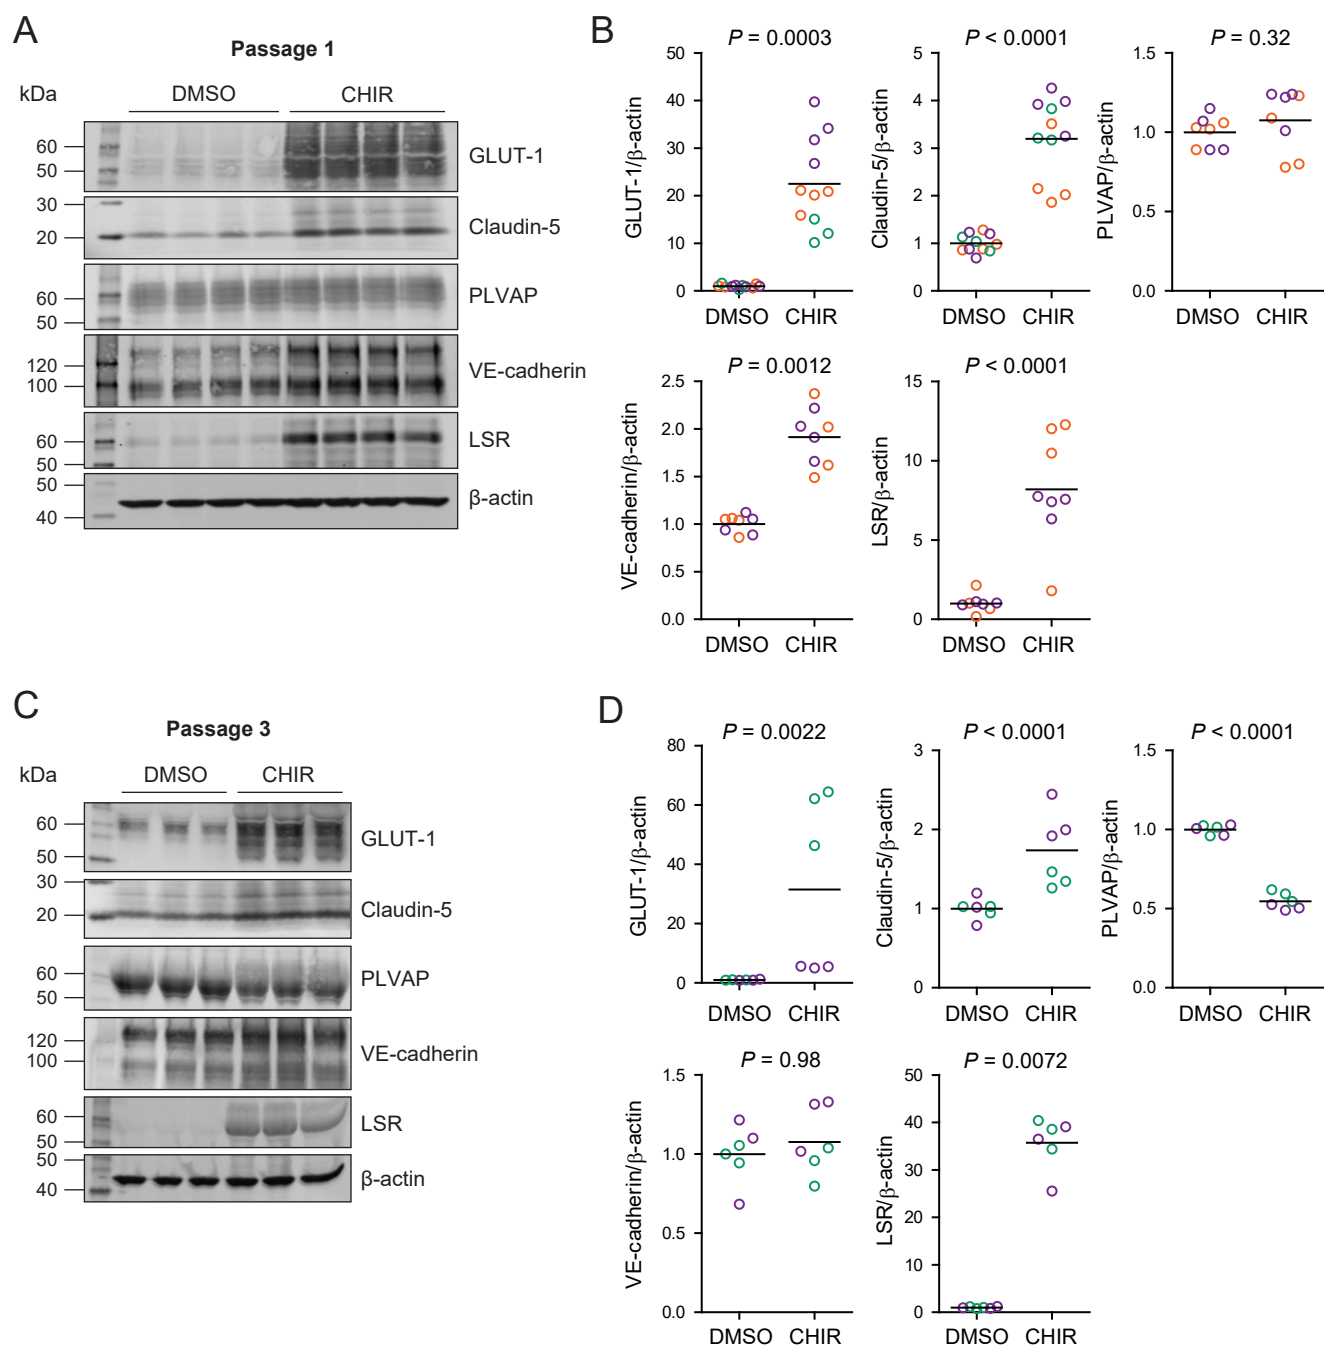

**Figure 5. Effect of CHIR on protein expression in Passage 1 and Passage 3 ECs. (A)** Western blots of Passage 1 ECs treated with DMSO or CHIR probed for GLUT-1, claudin-5, PLVAP, VE-cadherin, LSR, and  $\beta$ -actin. **(B)** Quantification of Western blots of Passage 1 ECs. GLUT-1, claudin-5, PLVAP, VE-cadherin, and LSR band intensities were normalized to  $\beta$ -actin band intensity. Points represent replicate wells from 2–3 independent differentiations of the IMR90-4 line, each differentiation indicated with a different color. Bars indicate mean values, with values normalized within each differentiation such that the mean of the DMSO condition equals 1. P-values: Two-way ANOVA on unnormalized data. **(C)** Western blots of Passage 3 ECs

treated with DMSO or CHIR probed for GLUT-1, claudin-5, PLVAP, VE-cadherin, LSR, and  $\beta$ -actin. **(D)**

Quantification of Western blots of passage 3 ECs. GLUT-1, claudin-5, PLVAP, VE-cadherin, and LSR band intensities were normalized to  $\beta$ -actin band intensity. Points represent replicate wells from 2 independent differentiations of the IMR90-4 line, each differentiation indicated with a different color. Bars indicate mean values, with values normalized within each differentiation such that the mean of the DMSO condition equals 1.

P-values: Two-way ANOVA on unnormalized data.

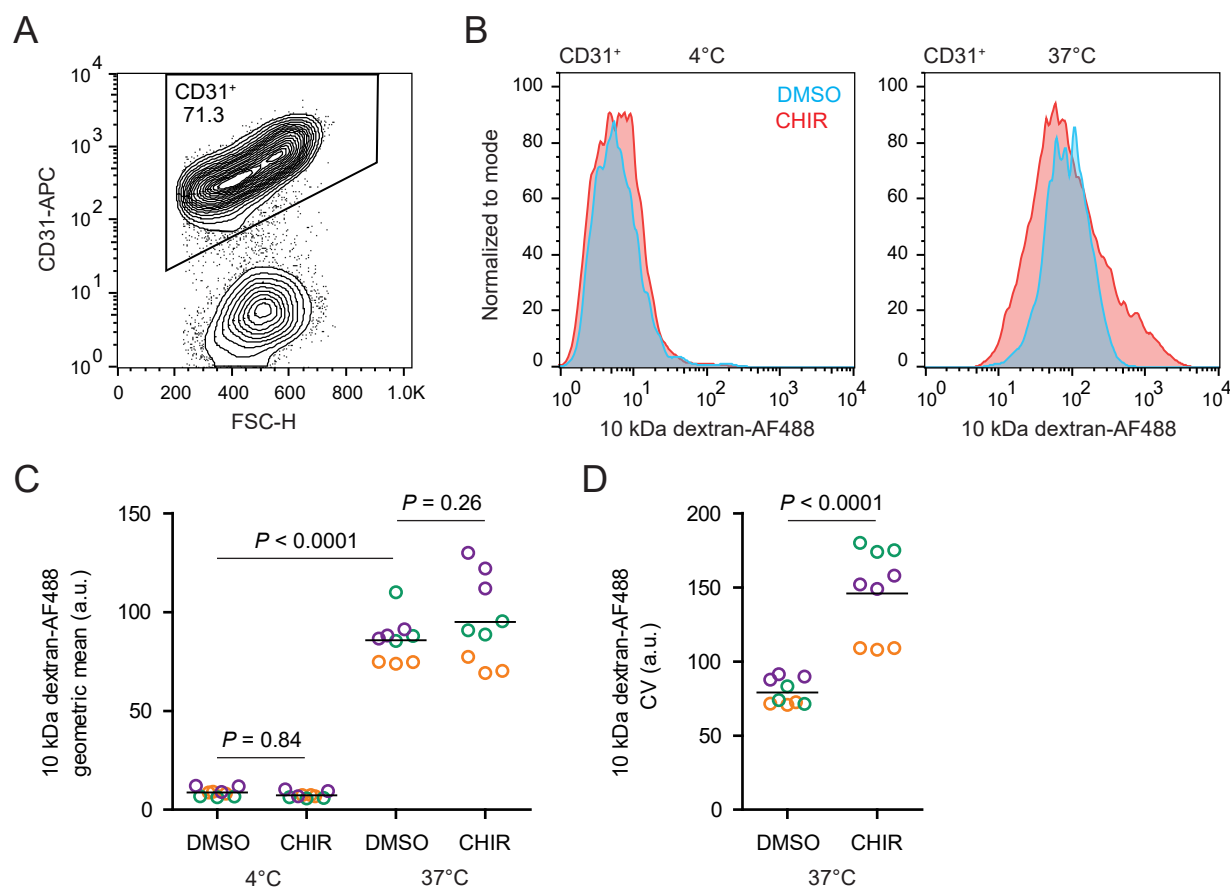

**Figure 6. Fluid-phase endocytosis in CHIR- and DMSO-treated ECs.** (A) Flow cytometry analysis of CD31 expression in Passage 1 ECs following the dextran internalization assay. CD31<sup>+</sup> cells were gated for further analysis. (B) Flow cytometry analysis of 10 kDa dextran-Alexa Fluor 488 (AF488) abundance in CD31<sup>+</sup> cells. Cells were treated with DMSO or CHIR for 6 d prior to the assay. Representative plots from cells incubated with dextran for 2 h at 4°C (left) and 37°C (right) are shown. (C) Quantification of 10 kDa dextran-AF488 geometric mean fluorescence intensity in CD31<sup>+</sup> cells. Treatment and assay conditions were as described in (B). Points represent replicate wells from 3 independent differentiations of the IMR90-4 line, each differentiation indicated with a different color. Bars indicate mean values. P-values: Two-way ANOVA followed by Tukey's HSD test. (D) Quantification of the coefficient of variation (CV) of 10 kDa dextran-AF488 fluorescence intensity in CD31<sup>+</sup> cells. Points represent replicate wells from 3 independent differentiations of the IMR90-4 line, each differentiation indicated with a different color. Bars indicate mean values. P-value: Two-way ANOVA.

A

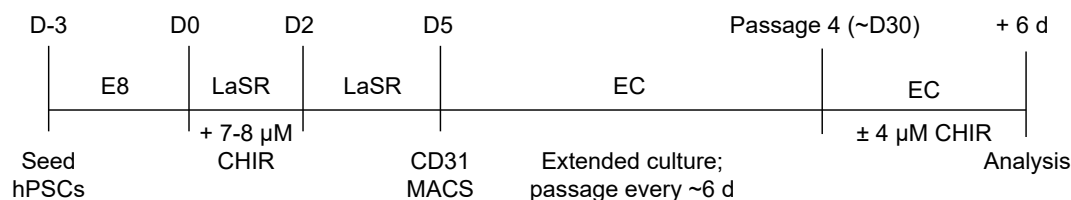

B

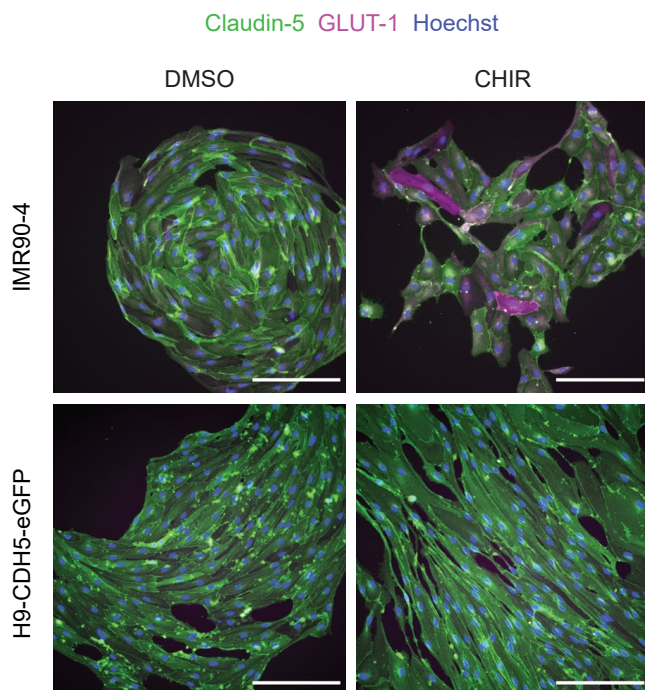

C

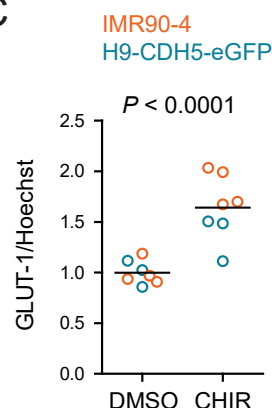

D

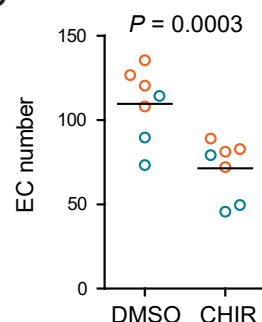

**Figure 7. Effect of CHIR treatment in matured endothelium.** (A) Overview of the endothelial differentiation, extended culture, and CHIR treatment protocol. (B) Immunocytochemistry analysis of claudin-5 and GLUT-1 expression in ECs treated with DMSO or CHIR as outlined in (A). Images from the IMR90-4 and H9-CDH5-eGFP lines are shown. Hoechst nuclear counterstain is overlaid. Scale bars: 200  $\mu$ m. (C) Quantification of images from the conditions described in (B) for GLUT-1 mean fluorescence intensity normalized to Hoechst mean fluorescence intensity within the area of claudin-5<sup>+</sup> ECs only. Points represent replicate wells from one differentiation of the IMR90-4 line (orange) and one differentiation of the H9-CDH5-eGFP line (blue). Bars indicate mean values, with values normalized within each differentiation such that the mean of the DMSO condition equals 1. P-value: Two-way ANOVA on unnormalized data. (D) Quantification of images from the conditions described in (B) for number of ECs per 20 $\times$  field. Points represent replicate wells



from one differentiation of the IMR90-4 line (orange) and one differentiation of the H9-CDH5-eGFP line (blue). Bars indicate mean values. P-value: Two-way ANOVA.

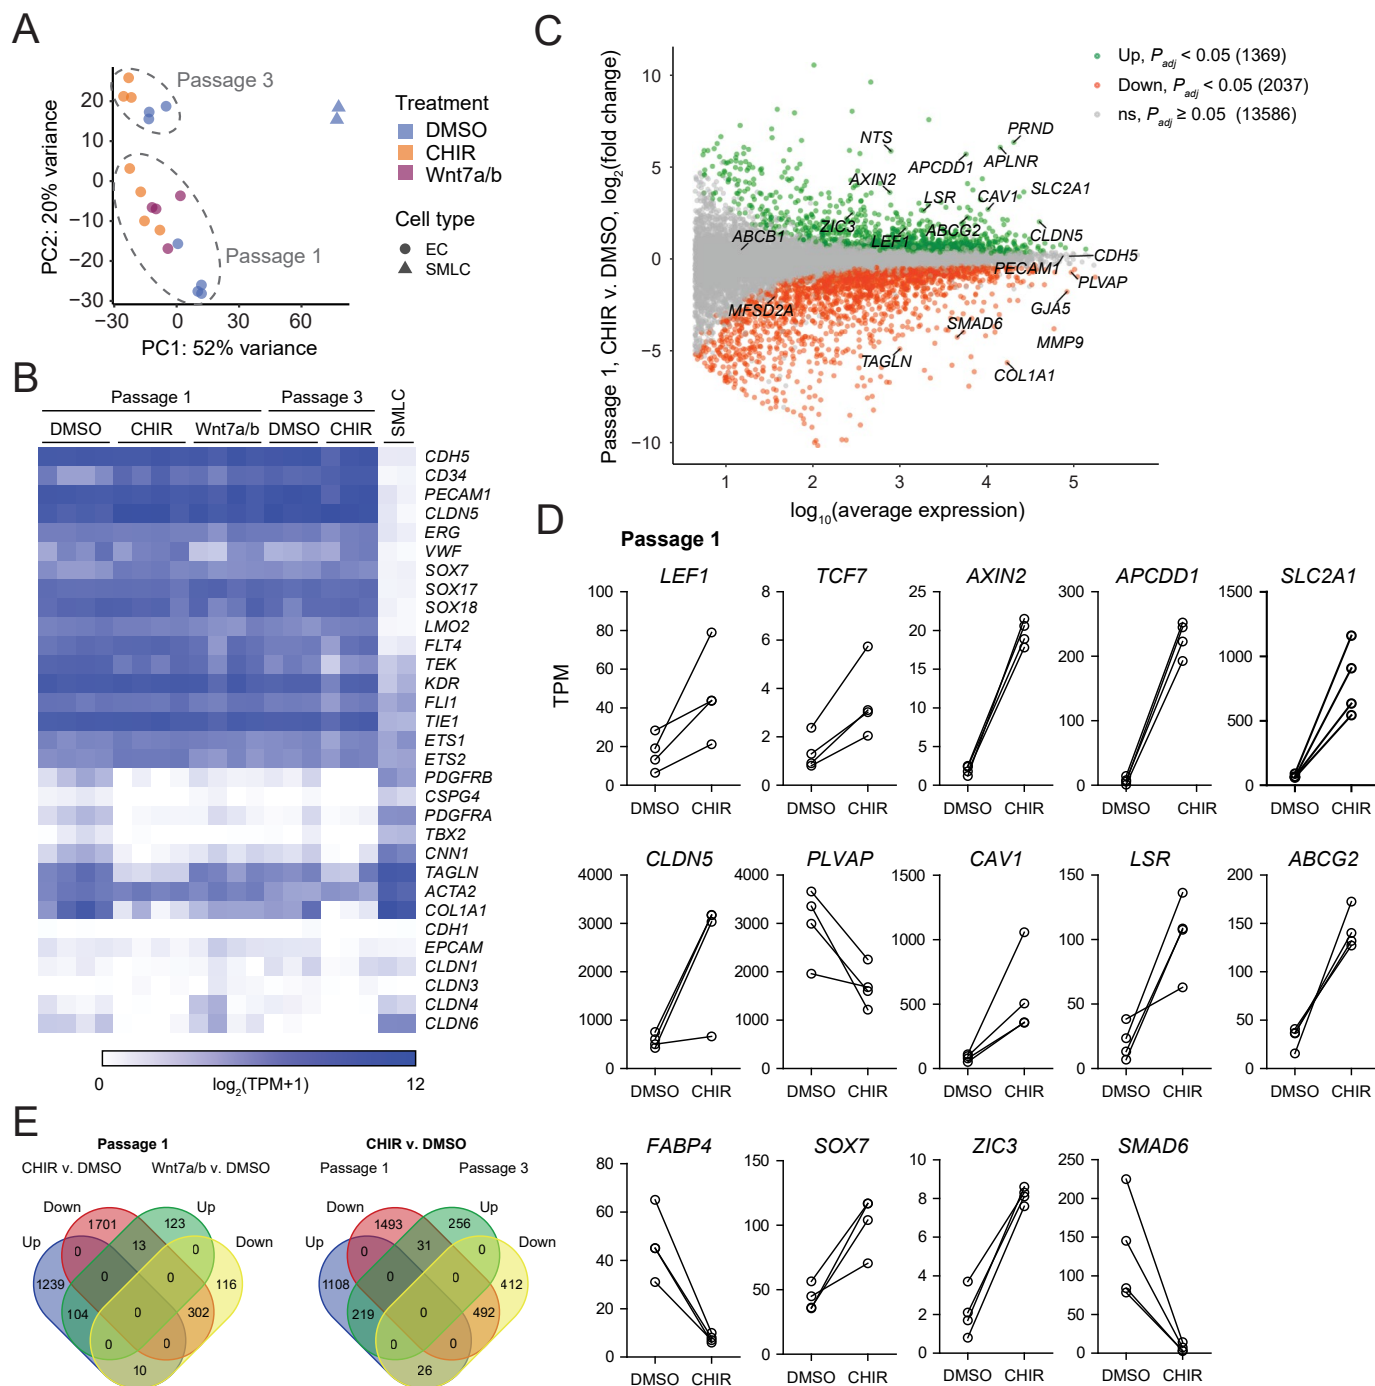

**Figure 8. RNA-seq of DMSO-, CHIR-, or Wnt7a/b-treated ECs.** (A) Principal component analysis of EC and SMLC whole-transcriptome data subject to variance stabilizing transformation by DESeq2. Points from Passage 1 ECs represent cells from 4 independent differentiations of the IMR90-4 line, points from Passage 3 ECs represent cells from 3 independent differentiations of the IMR90-4 line, and points from SMLCs represent 2 independent differentiations of the IMR90-4 line. Points are colored based on treatment: DMSO (blue), CHIR (orange), or Wnt7a/b (red). Data are plotted in the space of the first two principal components, with the

percentage of variance explained by principal component 1 (PC1) and principal component 2 (PC2) shown in axis labels. **(B)** Heat map of transcript abundance [ $\log_2(\text{TPM}+1)$ ] for endothelial, mesenchymal, and epithelial genes across all samples. Abundance data for all transcripts is provided in Supplementary file 1. **(C)** Differential expression analysis of Passage 1 CHIR-treated ECs compared to Passage 1 DMSO-treated ECs. Differentially expressed genes (adjusted P-values  $< 0.05$ , DESeq2 Wald test with Benjamini-Hochberg correction) are highlighted in green (upregulated) and red (downregulated). The number of upregulated, downregulated, and non-significant (ns) genes are shown in the legend. Complete results of differential expression analysis are provided in Supplementary file 2. **(D)** Transcript abundance (TPM) of Wnt-regulated, barrier-related genes in Passage 1 DMSO- and CHIR-treated ECs. Points represent cells from 4 independent differentiations of the IMR90-4 line and lines connect points from matched differentiations. All genes shown were differentially expressed (adjusted P-values  $< 0.05$ , DESeq2 Wald test with Benjamini-Hochberg correction). P-values are provided in Supplementary file 2. **(E)** Venn diagrams illustrating the number of genes identified as upregulated or downregulated (adjusted P-values  $< 0.05$ , DESeq2 Wald test with Benjamini-Hochberg correction) in Passage 1 ECs treated with CHIR versus DMSO compared to Wnt7a/b versus DMSO (left), or ECs treated with CHIR versus DMSO at Passage 1 compared to Passage 3 (right). Gene lists are provided in Supplementary file 2.

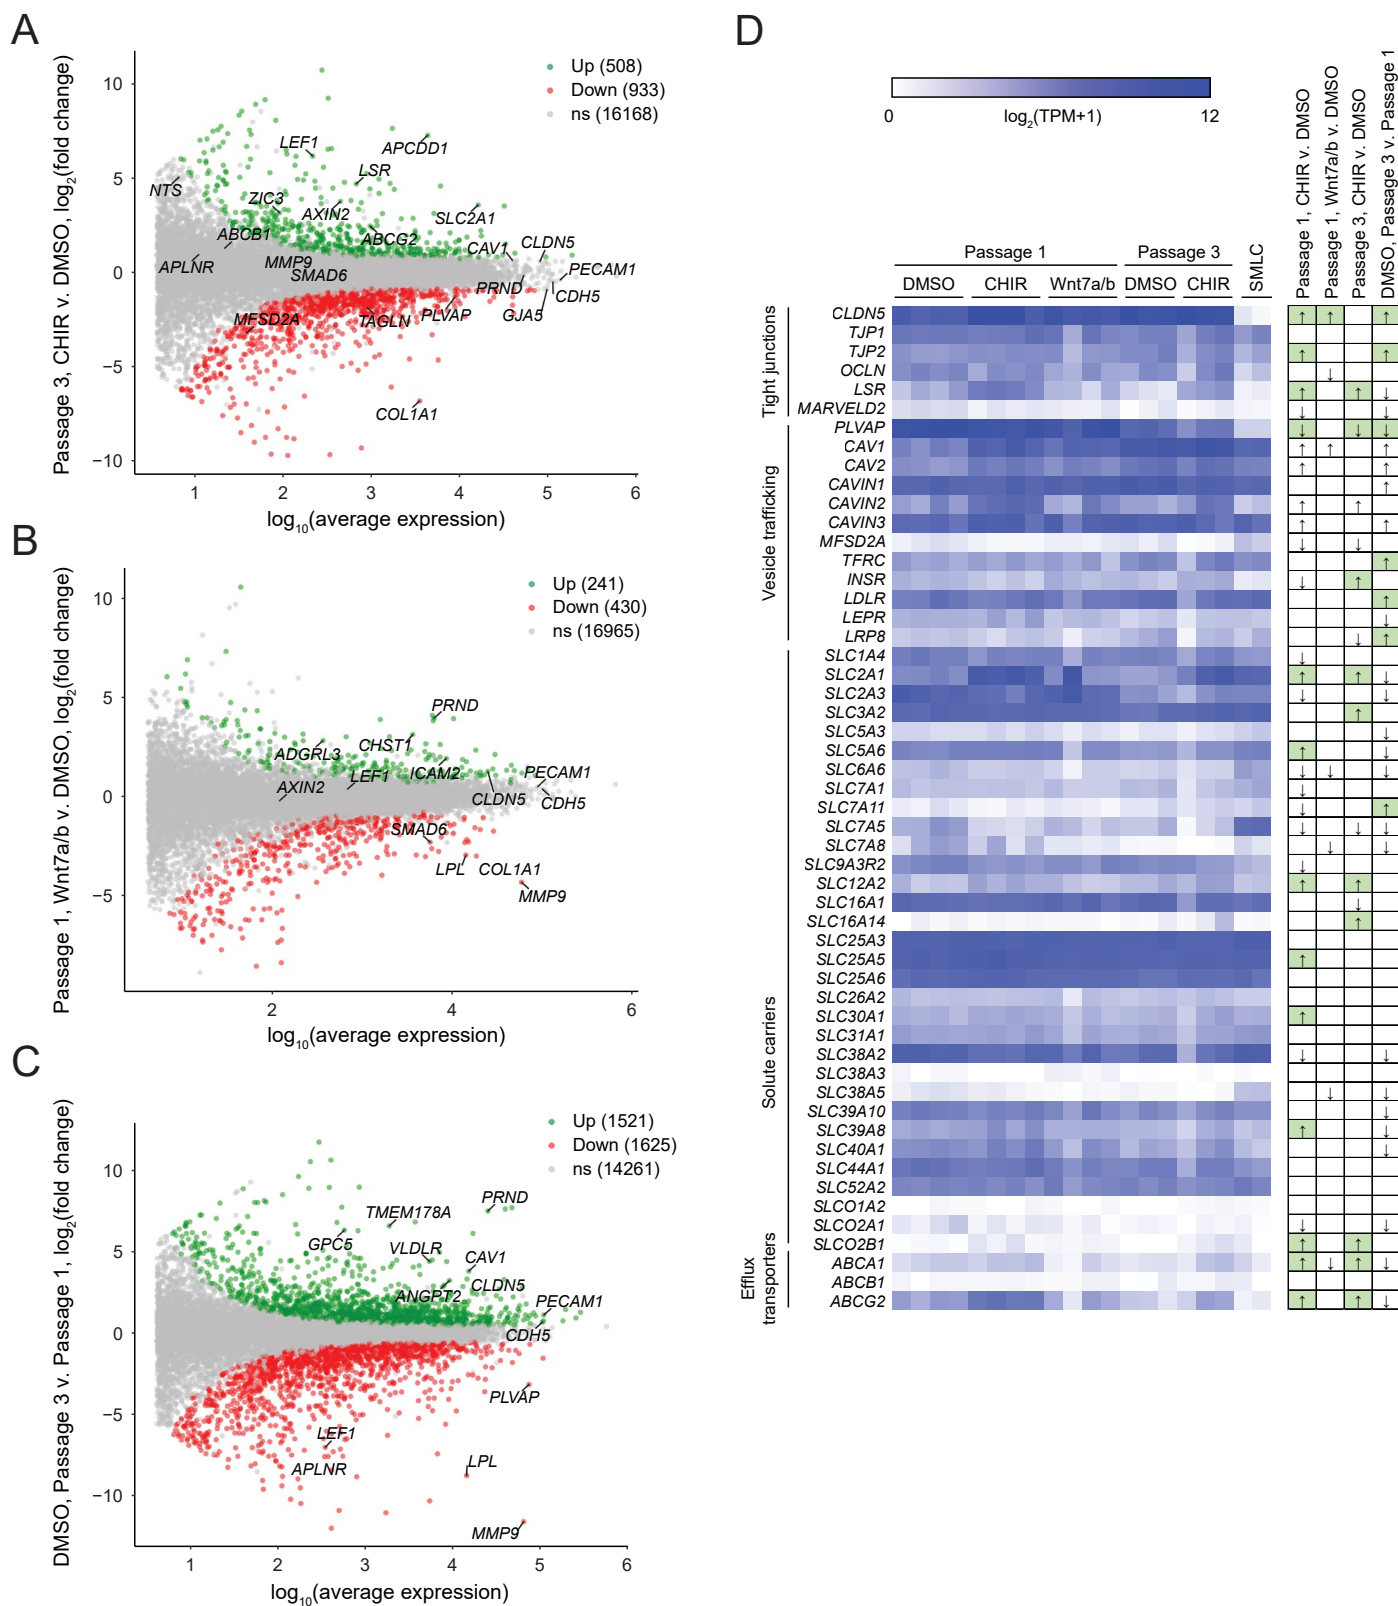

**Figure 8—figure supplement 1. RNA-seq differential expression analyses. (A-C)** Differential expression analysis of Passage 3 CHIR-treated ECs compared to Passage 3 DMSO-treated ECs (A), Passage 1 Wnt7a/b-treated ECs compared to Passage 1 DMSO-treated ECs (B), and Passage 3 DMSO-treated ECs compared to

Passage 1 DMSO-treated ECs (C). Differentially expressed genes (adjusted P-values < 0.05, DESeq2 Wald test with Benjamini-Hochberg correction) are highlighted in green (upregulated) and red (downregulated). The number of upregulated, downregulated, and non-significant (ns) genes are shown in the legends. Complete results of differential expression analyses are provided in Supplementary file 2. **(D)** Heat map of transcript abundance [ $\log_2(\text{TPM}+1)$ ] for BBB genes encompassing tight junctions, vesicle trafficking components, and solute carriers, and efflux transporters. Solute carrier and efflux transporter genes that were expressed in human brain ECs at an average of >100 TPM in a meta-analysis of scRNA-seq datasets (Gastfriend et al., 2021) are included. Abundance data for all transcripts is provided in Supplementary file 1. At right, arrows indicate directionality of change for differentially expressed genes (adjusted P-values < 0.05, DESeq2 Wald test with Benjamini-Hochberg correction) for the four comparisons shown above. Changes with expected directionality for gain of CNS EC character have arrows highlighted in green.

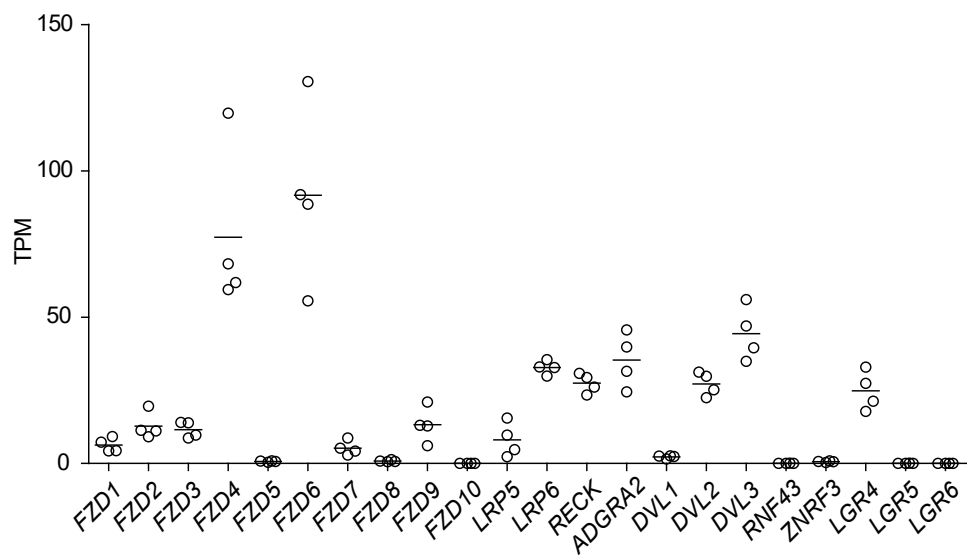

**Figure 8—figure supplement 2. Expression of Wnt pathway components in naïve ECs.** Abundance of transcripts (in transcripts per million, TPM) encoding Wnt receptors, co-receptors, and other pathway components in Passage 1 DMSO-treated ECs. Points represent cells from 4 independent differentiations of the IMR90-4 line. Bars indicate mean values. *ADGRA2* is also known as *GPR124*.

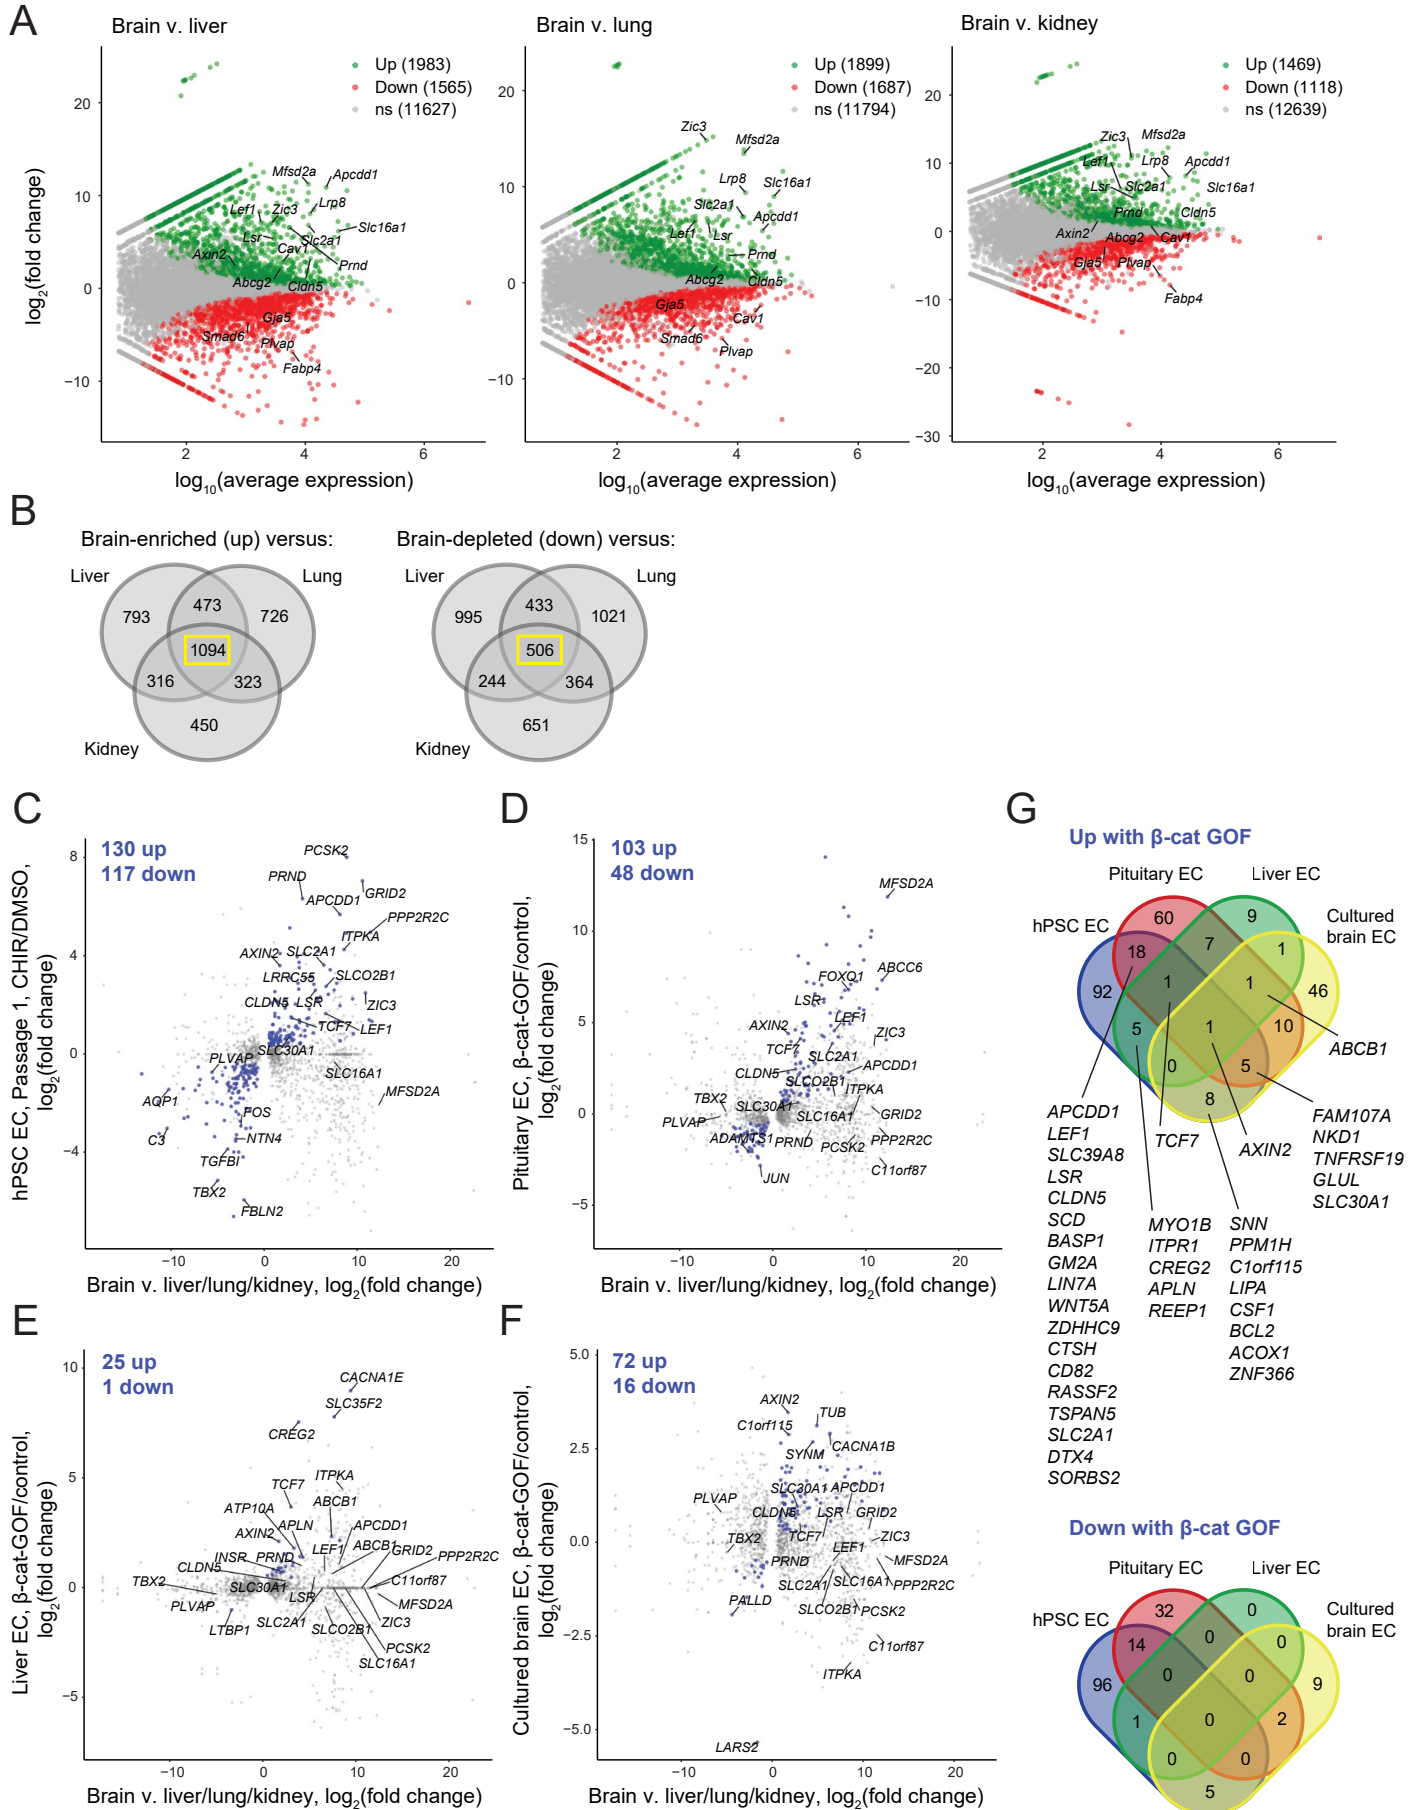

**Figure 9. Identification of concordantly Wnt-regulated CNS EC-associated genes in RNA-seq data. (A)**

Differential expression analysis of P7 murine brain ECs compared to liver, lung, or kidney ECs (Sabbagh *et al.*, 2018). Differentially expressed genes (adjusted P-values < 0.05, DESeq2 Wald test with Benjamini-Hochberg correction) are highlighted in green (up, brain-enriched) and red (down, brain-depleted). The number of up, down, and non-significant (ns) genes are shown in the legends. **(B)** Venn diagrams illustrating the number of genes identified as brain EC-enriched (left) or brain EC-depleted (right) versus liver, lung, or kidney ECs (adjusted P-values < 0.05, DESeq2 Wald test with Benjamini-Hochberg correction). The 1094 genes enriched in brain ECs compared to each other organ, and the 506 genes depleted in brain ECs compared to each other organ, were used for subsequent analysis of the effects of Wnt activation in the various experimental contexts. **(C-F)** In each plot, the x-axis indicates average  $\log_2$ (fold change) of gene expression in brain ECs compared to liver, lung, and kidney ECs for the 1094 brain EC-enriched genes and 506 brain EC-depleted genes described in **(B)** with known mouse-human homology. Homologous human gene names are shown. The y-axes indicate differential expression [ $\log_2$ (fold change)] in Passage 1 CHIR-treated ECs compared to Passage 1 DMSO-treated ECs **(C)**, in adult mouse pituitary ECs with stabilized  $\beta$ -catenin (gain-of-function, GOF) compared to controls (Wang *et al.*, 2019) **(D)**, in adult mouse liver ECs with stabilized  $\beta$ -catenin compared to controls (Munji *et al.*, 2020) **(E)**, or in cultured adult mouse brain ECs with stabilized  $\beta$ -catenin compared to controls (Sabbagh *et al.*, 2020) **(F)**. Points are highlighted in blue if concordantly-regulated (upregulated in both comparisons or downregulated in both comparisons). Genes were identified as upregulated or downregulated based on adjusted P-values < 0.05, DESeq2 Wald test with Benjamini-Hochberg correction. **(G)** Venn diagrams illustrating the number of brain EC-enriched genes concordantly upregulated with  $\beta$ -catenin GOF (top) and the number of brain EC-depleted genes concordantly downregulated with  $\beta$ -catenin GOF (bottom) for the four comparisons shown in **(C-F)**. Complete results of this analysis are provided in Supplementary file 3.
