# Supplementary material for: Wnt signaling mediates acquisition of blood-brain barrier properties in naïve endothelium derived from human pluripotent stem cells
Source: bioRxiv preprint, doi:10.1101/2021.05.12.443828, version 1 (2021-05-14)
Supplement: Supplementary file 3 [file 443828_file04.xlsx]

## Sheet: (A) Brain v. liver lung kidney
Brain v. Liver								Brain v. Lung								Brain v. Kidney
gene	baseMean	log2FoldChange	lfcSE	stat	pvalue	padj	Up/Dn?	gene	baseMean	log2FoldChange	lfcSE	stat	pvalue	padj	Up/Dn?	gene	baseMean	log2FoldChange	lfcSE	stat	pvalue	padj	Up/Dn?
0610007P14Rik	595.377	1.91334	0.582343	3.28559	0.0010177	0.00635276	Up	0610007P14Rik	689.453	1.64544	0.526429	3.12567	0.00177401	0.0105053	Up	0610010F05Rik	796.435	1.06584	0.532495	2.0016	0.0453273	0.179821	Up
1110002L01Rik	20.209	7.4379	3.3023	2.25234	0.0243009	0.089261	Up	0610031J06Rik	1242.78	0.796914	0.232835	3.42265	0.000620133	0.00426359	Up	0610031J06Rik	1264.35	0.858652	0.350658	2.44869	0.0143378	0.0757749	Up
1110004E09Rik	366.992	1.53734	0.674366	2.27969	0.0226263	0.0846743	Up	0610037P05Rik	762.11	0.92556	0.306157	3.02315	0.00250156	0.0141449	Up	1110008P14Rik	16.6736	7.38164	3.6605	2.01657	0.0437404	0.175169	Up
1110012J17Rik	933.932	6.32087	1.81391	3.48466	0.000492754	0.00337434	Up	1110001A16Rik	154.461	1.65425	0.672852	2.45857	0.0139491	0.0576714	Up	1110012J17Rik	1182.6	3.14571	0.632652	4.97226	6.61757e-07	1.35977e-05	Up
1110050K14Rik	172.858	4.17564	1.69	2.47079	0.0134814	0.0559116	Up	1110002B05Rik	1693.24	0.967749	0.356206	2.71682	0.00659124	0.0315797	Up	1110050K14Rik	190.028	7.89411	1.48446	5.31785	1.05003e-07	2.60812e-06	Up
1110065P20Rik	14.8256	6.9899	3.34599	2.08903	0.0367046	0.123392	Up	1110012J17Rik	1629.04	0.775603	0.248097	3.12621	0.00177076	0.010499	Up	1110054M08Rik	30.4903	8.25274	3.37589	2.44461	0.0145009	0.0763984	Up
1110067D22Rik	844.105	1.1165	0.464587	2.40321	0.0162517	0.0649684	Up	1110020G09Rik	508.625	0.784739	0.38679	2.02885	0.0424734	0.137582	Up	1110065P20Rik	17.0478	7.41315	3.63385	2.04003	0.0413477	0.167838	Up
1190002H23Rik	200.193	9.29155	1.59653	5.81986	5.8897e-09	1.07812e-07	Up	1110031I02Rik	231.293	1.75561	0.829351	2.11685	0.0342725	0.116747	Up	1110067D22Rik	987.963	1.03943	0.467614	2.22285	0.026226	0.120866	Up
1300010F03Rik	1293.35	0.979051	0.309846	3.1598	0.00157877	0.00922374	Up	1110034G24Rik	143.475	2.69158	0.696244	3.86585	0.000110701	0.00095223	Up	1190007I07Rik	38.5265	8.58983	2.69005	3.19319	0.0014071	0.0113718	Up
1500009C09Rik	22.8424	7.61324	2.9884	2.5476	0.0108468	0.0469081	Up	1190007I07Rik	42.6043	2.81084	1.21091	2.32127	0.0202724	0.077753	Up	1300010F03Rik	1447.75	1.10548	0.306582	3.60584	0.000311145	0.00317739	Up
1500011B03Rik	249.191	2.17335	0.606725	3.5821	0.000340847	0.00243176	Up	1300010F03Rik	1422.43	1.03853	0.223341	4.64997	3.31987e-06	4.0946e-05	Up	1500003O03Rik	1427.56	0.8657	0.365115	2.37103	0.0177384	0.0891074	Up
1500031L02Rik	315.023	2.37243	0.772467	3.07124	0.00213173	0.011893	Up	1500003O03Rik	1507.38	0.534347	0.261592	2.04267	0.041085	0.134244	Up	1500009C09Rik	26.4694	6.6058	2.78696	2.37025	0.017776	0.089267	Up
1600014C10Rik	269.789	1.60223	0.652393	2.45593	0.0140522	0.0580092	Up	1500009C09Rik	25.2986	7.90525	2.58575	3.05723	0.00223392	0.0128248	Up	1500031L02Rik	397.258	1.70798	0.610581	2.79731	0.00515302	0.0334498	Up
1700003F17Rik	16.4327	5.57948	2.74964	2.02917	0.0424414	0.138154	Up	1500011B03Rik	306.704	1.52528	0.528793	2.88445	0.003921	0.0204354	Up	1600012F09Rik	796.966	0.997814	0.454953	2.19322	0.0282913	0.12758	Up
1700010I14Rik	17.7728	7.25141	3.1476	2.30379	0.0212346	0.0804783	Up	1500031L02Rik	395.323	1.54224	0.408778	3.77281	0.00016142	0.00132742	Up	1700001C19Rik	28.6873	8.16396	3.01917	2.70404	0.00685027	0.0419221	Up
1700011J10Rik	23.0641	7.62732	2.9009	2.6293	0.00855611	0.0385165	Up	1600012F09Rik	804.793	0.820928	0.378997	2.16605	0.0303072	0.106494	Up	1700010I14Rik	20.4275	7.67403	3.40981	2.25057	0.0244127	0.115115	Up
1700020L24Rik	195.93	6.43418	0.914849	7.03305	2.02068e-12	5.46591e-11	Up	1600012H06Rik	1413.13	0.492044	0.225719	2.17989	0.0292654	0.103448	Up	1700019E19Rik	99.9489	2.43128	1.09111	2.22827	0.0258626	0.119728	Up
1700052N19Rik	240.843	2.73485	0.740456	3.69347	0.000221216	0.00166103	Up	1600014C10Rik	284.229	1.95543	0.484083	4.03945	5.35769e-05	0.000497292	Up	1700019G17Rik	33.6972	8.39608	2.89848	2.89672	0.00377091	0.02598	Up
1810041L15Rik	52.1427	8.80517	2.30914	3.81319	0.000137185	0.0010928	Up	1700001C19Rik	27.7211	8.03749	2.39951	3.34964	0.000809167	0.00534696	Up	1700020L24Rik	266.176	2.36613	0.884767	2.6743	0.00748856	0.0452643	Up
1810046J19Rik	436.013	1.14002	0.469088	2.43028	0.015087	0.0612808	Up	1700020L24Rik	274.136	1.88392	0.488224	3.85873	0.000113979	0.000976058	Up	1700026J04Rik	94.5178	2.94692	1.28499	2.29335	0.0218281	0.10491	Up
2010106G01Rik	2026.34	1.13825	0.247378	4.60127	4.19926e-06	4.70287e-05	Up	1700030C10Rik	14.9359	7.14612	2.89734	2.46644	0.0136463	0.0566785	Up	1700052N19Rik	294.919	2.15363	0.697265	3.08868	0.00201049	0.0154138	Up
2010300C02Rik	80.1385	9.42455	1.95274	4.82633	1.39073e-06	1.70885e-05	Up	1700095A21Rik	14.4372	7.09681	2.92559	2.42577	0.0152759	0.0620952	Up	1700088E04Rik	55.9985	9.12907	2.39669	3.80903	0.000139511	0.00156536	Up
2010317E24Rik	17.7804	5.6896	2.85435	1.99331	0.0462277	0.147344	Up	1810037I17Rik	1312.52	0.70157	0.344215	2.03817	0.0415327	0.135304	Up	1700128F08Rik	41.7634	5.63418	1.834	3.07207	0.00212582	0.0160673	Up
2310001A20Rik	1362.44	0.940882	0.430542	2.18534	0.0288637	0.101886	Up	1810041L15Rik	58.7926	7.65264	1.95769	3.90901	9.26766e-05	0.00081125	Up	1810013L24Rik	887.419	0.988079	0.422157	2.34055	0.0192553	0.0950038	Up
2310005G13Rik	19.9312	7.41666	3.05989	2.42383	0.0153579	0.0621296	Up	1810046J19Rik	454.496	1.4834	0.396037	3.7456	0.000179963	0.00145983	Up	2010011I20Rik	526.765	2.11607	0.54109	3.91075	9.20081e-05	0.00108514	Up
2310022B05Rik	1156.07	0.993255	0.294892	3.3682	0.000756599	0.00490238	Up	2010011I20Rik	595.63	1.18741	0.39051	3.04067	0.00236056	0.0134415	Up	2010110P09Rik	83.8568	9.71198	2.12091	4.57916	4.66849e-06	7.76857e-05	Up
2310039H08Rik	20.1889	7.43553	2.97655	2.49804	0.0124883	0.0527001	Up	2010106G01Rik	2551.71	0.638923	0.191207	3.34152	0.00083321	0.00548591	Up	2010300C02Rik	92.5064	8.41559	1.94242	4.33254	1.47399e-05	0.000215797	Up
2310044G17Rik	555.063	0.983477	0.419071	2.3468	0.0189352	0.0737341	Up	2010110P09Rik	81.5327	8.13507	1.73931	4.6772	2.90825e-06	3.64836e-05	Up	2310001A20Rik	1637.35	0.770255	0.378864	2.03306	0.0420463	0.169994	Up
2610019F03Rik	3393.24	3.34622	0.340767	9.8197	9.2619e-23	5.22488e-21	Up	2010300C02Rik	93.568	4.36703	0.905572	4.8224	1.41843e-06	1.90528e-05	Up	2310005G13Rik	22.8901	7.83815	3.30412	2.37223	0.0176809	0.0888776	Up
2610109H07Rik	51.1251	5.75872	1.54872	3.71838	0.000200501	0.00152588	Up	2310001A20Rik	1703.22	0.504896	0.220566	2.2891	0.0220738	0.0832301	Up	2310009B15Rik	20.1783	7.65632	3.42379	2.23621	0.0253377	0.117979	Up
2610301B20Rik	394.729	1.40923	0.699963	2.01329	0.0440842	0.142184	Up	2310005G13Rik	22.1073	7.71084	2.61594	2.94763	0.00320217	0.0173413	Up	2310045N01Rik	100.591	2.72058	1.12746	2.41303	0.0158206	0.0816558	Up
2610305D13Rik	239.416	3.75535	0.995362	3.77284	0.000161397	0.00125858	Up	2310008H09Rik	1710.76	0.582951	0.207211	2.81333	0.00490314	0.0247166	Up	2310046O06Rik	601.259	0.997218	0.463089	2.1534	0.031287	0.137324	Up
2700023E23Rik	31.0383	5.44488	2.18053	2.49704	0.0125235	0.0528339	Up	2310009B15Rik	20.9612	3.74427	1.73487	2.15824	0.0309088	0.108114	Up	2310061I04Rik	377.667	1.51338	0.752984	2.00985	0.0444472	0.177253	Up
2810055F11Rik	119.596	2.4748	0.895395	2.76392	0.0057111	0.0274276	Up	2310022B05Rik	1356.02	0.782917	0.229195	3.41594	0.00063562	0.00434675	Up	2410002O22Rik	912.569	0.955109	0.396219	2.41056	0.015928	0.0820712	Up
2810405K02Rik	16.0716	7.1068	3.22745	2.20198	0.0276664	0.0989158	Up	2310046O06Rik	608.462	0.811366	0.326965	2.48151	0.0130828	0.0548563	Up	2510009E07Rik	4013.37	0.411665	0.205402	2.00419	0.0450495	0.178999	Up
2810407C02Rik	5167.84	0.859525	0.167564	5.12954	2.90454e-07	4.08872e-06	Up	2410003K15Rik	336.041	0.89377	0.435165	2.05387	0.0399886	0.131472	Up	2610019F03Rik	3777.6	4.04512	0.27079	14.9382	1.85895e-50	5.34046e-48	Up
2810459M11Rik	20.6301	7.4662	3.14935	2.37071	0.0177539	0.0699963	Up	2410004N09Rik	167.52	1.30102	0.614183	2.1183	0.0341496	0.116457	Up	2610109H07Rik	58.9239	5.78595	1.95245	2.96343	0.00304232	0.0217374	Up
2900011O08Rik	122.753	7.49828	1.63018	4.59966	4.2319e-06	4.73592e-05	Up	2410015M20Rik	263.861	1.55763	0.646179	2.41053	0.0159293	0.0643363	Up	2610203C20Rik	41.8812	8.71026	2.61326	3.3331	0.000858846	0.00750366	Up
2900026A02Rik	2328.58	1.57725	0.22346	7.05831	1.68545e-12	4.59187e-11	Up	2410042D21Rik	687.006	0.954948	0.399914	2.38788	0.0169457	0.0676422	Up	2700046A07Rik	22.2864	6.35612	2.81012	2.26187	0.0237056	0.112373	Up
3110082D06Rik	54.2424	7.3616	2.12735	3.46045	0.000539277	0.00363734	Up	2410137F16Rik	11.1083	6.71934	3.25627	2.06351	0.0390646	0.129152	Up	2700089E24Rik	1609.68	0.690689	0.3131	2.20597	0.027386	0.124657	Up
3632451O06Rik	110.47	8.40528	1.94734	4.31628	1.58684e-05	0.000156061	Up	2510002D24Rik	247.56	1.00751	0.494547	2.03724	0.0416256	0.13555	Up	2810002D19Rik	74.113	8.09579	2.04944	3.95025	7.80697e-05	0.000941352	Up
3830431G21Rik	160.626	4.83618	2.02038	2.3937	0.0166792	0.0663973	Up	2510009E07Rik	3472.96	0.819912	0.162654	5.04084	4.63494e-07	6.77618e-06	Up	2810407C02Rik	6003.67	0.825472	0.265685	3.10696	0.00189022	0.0146094	Up
4632428N05Rik	3560.76	0.852625	0.293281	2.90719	0.0036469	0.0188198	Up	2610001J05Rik	684.352	1.49517	0.329934	4.53174	5.85e-06	6.78018e-05	Up	2810459M11Rik	23.658	7.8856	3.3791	2.33364	0.0196148	0.096154	Up
4632434I11Rik	144.9	1.87485	0.802403	2.33654	0.0194632	0.0752493	Up	2610017I09Rik	14.6112	7.11487	2.97676	2.39014	0.016842	0.0673155	Up	2900008C10Rik	16.3098	7.3497	3.67922	1.99762	0.0457575	0.181103	Up
4833417C18Rik	19.7436	7.40379	3.00263	2.46576	0.0136722	0.0566099	Up	2610019F03Rik	3565.14	4.89252	0.332892	14.697	6.73479e-49	8.77806e-47	Up	2900011O08Rik	140.068	10.4516	2.02125	5.17086	2.33016e-07	5.38377e-06	Up
4921507P07Rik	21.9799	7.55807	2.89822	2.60783	0.0091118	0.0406323	Up	2610203C20Rik	44.0487	3.54099	1.21268	2.91997	0.0035007	0.0186688	Up	2900097C17Rik	4963.97	0.7657	0.268076	2.85627	0.00428646	0.0289436	Up
4930412O13Rik	18.4496	7.30503	3.68926	1.98008	0.0476943	0.150815	Up	2610301B20Rik	443.541	1.36906	0.429938	3.18432	0.00145097	0.00887666	Up	3110047P20Rik	64.1597	9.32509	2.51626	3.70594	0.000210609	0.00223981	Up
4930452B06Rik	36.4202	8.28663	2.45358	3.37737	0.000731837	0.00476227	Up	2700089E24Rik	1569.83	0.663482	0.23135	2.86788	0.00413235	0.0213992	Up	3110082D06Rik	61.8464	9.27216	2.43634	3.80577	0.000141362	0.00158496	Up
4930506M07Rik	40.751	8.44854	2.4333	3.47205	0.000516497	0.00351158	Up	2810055F11Rik	158.493	1.30935	0.614496	2.13077	0.033108	0.113915	Up	3830431G21Rik	177.72	10.7952	2.3579	4.57829	4.68798e-06	7.79248e-05	Up
4930523C07Rik	636.583	2.31917	0.57549	4.0299	5.58015e-05	0.000485822	Up	2810407C02Rik	5487.95	1.06638	0.128892	8.2735	1.30083e-16	4.92777e-15	Up	4632428N05Rik	3369.58	1.85785	0.323144	5.7493	8.96131e-09	2.69122e-07	Up
4930550C14Rik	13.7774	6.88473	3.42749	2.00868	0.0445711	0.143176	Up	2810432L12Rik	232.943	1.16713	0.542942	2.14965	0.031583	0.109972	Up	4833424O15Rik	46.7779	8.86921	3.01141	2.9452	0.00322743	0.0228244	Up
4930556M19Rik	66.0575	3.45627	1.16207	2.97424	0.00293715	0.0155953	Up	2810459M11Rik	22.8264	7.75681	2.73135	2.83992	0.00451247	0.0230188	Up	4833439L19Rik	1507.8	1.29961	0.464295	2.7991	0.00512456	0.0333239	Up
4930578C19Rik	416.385	11.8019	1.56034	7.56365	3.91921e-14	1.24423e-12	Up	2900011O08Rik	135.854	7.83875	1.48684	5.27208	1.34884e-07	2.12335e-06	Up	4921507P07Rik	25.5418	6.55381	2.7002	2.42716	0.0152175	0.0792885	Up
4931406P16Rik	9906.5	0.847009	0.143498	5.9026	3.57827e-09	6.78259e-08	Up	2900026A02Rik	3149.12	0.691927	0.160924	4.29972	1.71017e-05	0.000179007	Up	4922501C03Rik	390.277	2.53294	0.738227	3.43111	0.000601106	0.0055638	Up
4933411K20Rik	725.614	1.2624	0.544299	2.31931	0.0203782	0.0779922	Up	2900064A13Rik	1261.57	0.850533	0.282705	3.00856	0.00262493	0.0147268	Up	4930443O20Rik	35.1769	3.56402	1.75416	2.03175	0.0421787	0.170393	Up
4933424B01Rik	1039.66	0.852963	0.316661	2.69362	0.00706814	0.0327408	Up	2900092D14Rik	53.6751	4.75358	1.58474	2.99959	0.00270344	0.0150922	Up	4930486L24Rik	149.447	2.21976	1.00074	2.21812	0.0265464	0.121994	Up
4933431E20Rik	604.085	2.37751	0.687598	3.4577	0.000544804	0.00367114	Up	2900097C17Rik	4898.38	0.688976	0.245375	2.80785	0.00498732	0.0250756	Up	4930520O04Rik	18.8418	7.55815	3.52369	2.14495	0.0319567	0.139659	Up
5330437I02Rik	16.431	7.13804	3.26537	2.18598	0.028817	0.101792	Up	3110047P20Rik	67.1521	3.5687	1.65188	2.16039	0.0307426	0.107648	Up	4930550C14Rik	15.896	7.31271	3.72335	1.96401	0.0495286	0.191304	Up
5430407P10Rik	425.709	6.93298	0.982505	7.05644	1.70827e-12	4.64571e-11	Up	3632451O06Rik	121.891	10.174	1.90992	5.32695	9.98766e-08	1.61865e-06	Up	4930572J05Rik	50.2237	2.97818	1.51089	1.97115	0.0487072	0.189333	Up
5730403B10Rik	1048.49	0.906949	0.30202	3.00295	0.0026738	0.0144343	Up	3830431G21Rik	179.835	4.32886	1.6871	2.56586	0.010292	0.0452783	Up	4930594C11Rik	33.646	6.95512	2.56202	2.71471	0.00663348	0.0408251	Up
5730508B09Rik	123.837	2.38228	0.829758	2.87105	0.00409112	0.0207774	Up	4632428N05Rik	3806.2	1.03342	0.173253	5.9648	2.44927e-09	4.97619e-08	Up	4931406P16Rik	11388.2	0.857234	0.199222	4.30292	1.68564e-05	0.000241672	Up
6030419C18Rik	127.264	10.0916	2.21646	4.55301	5.2883e-06	5.77753e-05	Up	4930444A02Rik	216.035	1.65405	0.631191	2.62051	0.00877973	0.0398208	Up	4933411K20Rik	874.813	1.05497	0.409964	2.57332	0.0100727	0.0570349	Up
6230409E13Rik	137.11	10.1991	2.0213	5.04579	4.51641e-07	6.14127e-06	Up	4930550C14Rik	15.3999	7.1904	2.87621	2.49996	0.0124208	0.0526258	Up	4933431E20Rik	614.658	4.2086	0.646651	6.50831	7.60032e-11	3.12763e-09	Up
6330403K07Rik	38.383	8.36244	2.4004	3.48376	0.00049442	0.00338422	Up	4930578C19Rik	647.222	1.33469	0.364743	3.65927	0.000252939	0.00195881	Up	4933439F18Rik	802.031	1.08756	0.457891	2.37514	0.0175422	0.0884427	Up
6330407J23Rik	178.832	10.5824	1.90728	5.54839	2.88314e-08	4.76079e-07	Up	4930594C11Rik	34.9473	3.65874	1.46134	2.50369	0.0122905	0.0521602	Up	5330437I02Rik	18.8724	7.55969	3.53558	2.13818	0.0325023	0.141331	Up
6330439K17Rik	166.249	3.58284	1.7304	2.07053	0.0384031	0.127604	Up	4933409K07Rik	7443.31	0.714438	0.128259	5.57029	2.54321e-08	4.46513e-07	Up	5430407P10Rik	498.275	5.35526	1.14013	4.69705	2.63946e-06	4.67307e-05	Up
6330527O06Rik	22.6827	7.60345	2.87259	2.6469	0.00812337	0.036941	Up	4933431E20Rik	642.242	2.85392	0.445765	6.40229	1.53059e-10	3.57216e-09	Up	5430417L22Rik	401.381	1.22648	0.567167	2.16247	0.0305822	0.13493	Up
6430598A04Rik	126.713	3.16859	1.50626	2.10361	0.035412	0.119927	Up	5430407P10Rik	470.529	12.1232	1.51088	8.02393	1.02412e-15	3.63763e-14	Up	5730469M10Rik	333.885	1.71286	0.625089	2.74019	0.00614037	0.0384904	Up
6430704M03Rik	390.082	11.7078	3.36387	3.48045	0.000500568	0.00342009	Up	5430416O09Rik	66.8605	3.85132	1.86339	2.06683	0.0387498	0.128387	Up	5830432E09Rik	53.6603	4.70312	2.1503	2.18719	0.0287285	0.128919	Up
6720456B07Rik	2220.83	0.672665	0.236557	2.84356	0.00446121	0.0223798	Up	5730403B10Rik	1213.26	0.760006	0.281232	2.70242	0.00688368	0.0326058	Up	6030419C18Rik	146.967	7.01539	1.91688	3.65979	0.00025242	0.00264329	Up
8030462N17Rik	672.29	1.43967	0.445352	3.23265	0.00122646	0.00744461	Up	5730455P16Rik	620.86	0.865015	0.433827	1.99392	0.0461612	0.146716	Up	6330406I15Rik	46.9515	8.87473	2.56639	3.45806	0.000544073	0.00510417	Up
8430419L09Rik	143.512	3.46756	1.62798	2.12998	0.0331736	0.113919	Up	6030419C18Rik	142.493	6.25799	1.69666	3.68843	0.000225646	0.00177063	Up	6330407J23Rik	205.414	9.56796	1.89436	5.05075	4.40081e-07	9.37156e-06	Up
8430429K09Rik	173.901	2.88052	0.866571	3.32405	0.000887208	0.00563557	Up	6230409E13Rik	185.825	2.15347	1.04264	2.0654	0.0388852	0.128697	Up	6330439K17Rik	175.876	10.7801	2.24094	4.81051	1.50542e-06	2.83332e-05	Up
9030612E09Rik	33.6289	8.17235	2.55888	3.19372	0.0014045	0.00832876	Up	6330406I15Rik	50.8344	3.04371	1.29939	2.34241	0.0191597	0.0743381	Up	6430573F11Rik	121.412	10.2457	1.92072	5.33433	9.59e-08	2.40556e-06	Up
9330182L06Rik	124.632	2.87448	1.14245	2.51607	0.0118673	0.0505433	Up	6330407J23Rik	197.993	10.874	1.8045	6.02605	1.68016e-09	3.51576e-08	Up	6430704M03Rik	447.241	10.692	1.92784	5.54611	2.92087e-08	7.98442e-07	Up
9430020K01Rik	17112.2	1.87107	0.1382	13.5388	9.22316e-42	9.85644e-40	Up	6330439K17Rik	174.576	5.09794	1.74812	2.91625	0.00354267	0.0188404	Up	6720456B07Rik	2632.53	0.568292	0.238314	2.38463	0.0170963	0.0866828	Up
9430031J16Rik	21.4188	7.52038	3.05606	2.46081	0.0138624	0.0573506	Up	6330527O06Rik	25.2157	7.90095	2.44789	3.22766	0.00124808	0.00779671	Up	8030462N17Rik	760.049	1.54147	0.463484	3.32584	0.000881523	0.007661	Up
9430038I01Rik	98.4033	2.4838	1.23205	2.01599	0.0438007	0.141486	Up	6330578E17Rik	1743.83	1.01751	0.226479	4.49274	7.03133e-06	8.01051e-05	Up	9030612E09Rik	38.85	8.60215	2.74198	3.13721	0.00170566	0.0134145	Up
9830166K06Rik	26.2067	6.28512	2.39847	2.62047	0.00878093	0.0394466	Up	6430598A04Rik	130.112	4.95414	1.39808	3.54352	0.00039482	0.00289296	Up	9130221H12Rik	98.8818	8.51172	1.91789	4.43806	9.07724e-06	0.000139606	Up
9930013L23Rik	41.1563	8.46268	2.68009	3.1576	0.00159071	0.00928068	Up	6430704M03Rik	440.197	5.55669	1.10973	5.00723	5.52182e-07	7.92216e-06	Up	9330159F19Rik	77.775	3.9098	1.72402	2.26784	0.0233388	0.111014	Up
A130022J15Rik	5419.45	4.05587	0.23257	17.4394	4.14744e-68	8.62157e-66	Up	6720456B07Rik	2645.09	0.438182	0.186965	2.34366	0.0190954	0.0741822	Up	9330182L06Rik	125.901	10.2977	2.08773	4.9325	8.11853e-07	1.63293e-05	Up
A230051G13Rik	19.5359	7.38813	3.00935	2.45506	0.014086	0.0581174	Up	8030462N17Rik	771.759	1.28928	0.445276	2.89546	0.00378604	0.0198599	Up	9430020K01Rik	20693	1.57221	0.143731	10.9386	7.53671e-28	1.06254e-25	Up
A2ld1	136.607	3.23714	1.06004	3.0538	0.00225963	0.0125008	Up	8430429K09Rik	241.54	1.28175	0.568506	2.2546	0.0241585	0.0893518	Up	9430031J16Rik	24.5751	7.94052	3.28534	2.41696	0.0156508	0.0809439	Up
A330049M08Rik	22.7327	7.6066	2.87329	2.64735	0.00811248	0.0369025	Up	9030612E09Rik	37.6696	8.48115	2.22686	3.80857	0.000139773	0.00116452	Up	9830147E19Rik	127.41	2.17431	1.03505	2.10068	0.0356693	0.15145	Up
A330050F15Rik	33.3531	8.15934	2.85238	2.86053	0.00422928	0.0213646	Up	9330182L06Rik	128.695	4.09157	1.66416	2.45864	0.0139464	0.0576714	Up	9830166K06Rik	29.7884	8.2187	2.94246	2.79314	0.00521999	0.0337636	Up
A730017C20Rik	28.8865	7.95192	2.81525	2.82459	0.00473418	0.0234987	Up	9430020K01Rik	23766.7	0.772266	0.102787	7.5133	5.76562e-14	1.83213e-12	Up	9930013L23Rik	48.83	4.83335	1.9697	2.45386	0.0141333	0.0748762	Up
A730020E08Rik	51.8765	7.30545	2.01132	3.63216	0.000281057	0.00205445	Up	9430031J16Rik	24.0309	6.33277	2.38313	2.65733	0.0078762	0.0364209	Up	A130022J15Rik	8939.46	0.953395	0.261017	3.65262	0.000259576	0.00271077	Up
A930011O12Rik	49.3606	4.45814	1.99247	2.23749	0.0252545	0.0919261	Up	9830166K06Rik	28.8412	8.09538	2.32221	3.48606	0.000490183	0.00348819	Up	A330049M08Rik	26.14	8.02986	3.10622	2.58509	0.00973537	0.0556213	Up
A930012L18Rik	36.0366	6.85321	2.18871	3.13116	0.00174119	0.0100199	Up	9930012K11Rik	478.389	1.39604	0.593825	2.35094	0.0187262	0.0730384	Up	A330050F15Rik	38.2238	8.57779	3.01999	2.84034	0.00450654	0.0300686	Up
A930015D03Rik	55.0486	5.55621	1.82314	3.04761	0.00230666	0.0127252	Up	A130022J15Rik	7438.07	1.72354	0.202039	8.53072	1.45437e-17	5.83628e-16	Up	A730017C20Rik	33.1341	8.37166	3.00681	2.78423	0.00536547	0.0344994	Up
A930038C07Rik	794.502	9.68251	0.966507	10.018	1.26991e-23	7.49839e-22	Up	A2ld1	151.489	3.37006	0.719493	4.68394	2.81408e-06	3.5505e-05	Up	A830010M20Rik	309.762	3.19202	1.06706	2.9914	0.00277703	0.0200774	Up
AA986860	23.9966	7.68504	2.79166	2.75286	0.00590774	0.0282007	Up	A330050F15Rik	36.8642	8.44846	2.54086	3.32504	0.000884068	0.00577857	Up	A930011O12Rik	54.2143	9.08225	2.45076	3.70589	0.000210653	0.00223981	Up
AI414108	156.039	10.3857	2.26656	4.58215	4.6023e-06	5.10526e-05	Up	A530016L24Rik	11.5905	6.78112	3.37885	2.00693	0.0447566	0.143378	Up	A930012L18Rik	41.2133	8.68704	2.6258	3.30834	0.000938508	0.00810535	Up
AI467606	61.0698	9.03247	2.09329	4.31497	1.59625e-05	0.000156885	Up	A630033H20Rik	75.8158	4.03443	1.18634	3.40074	0.000672045	0.00456097	Up	A930038C07Rik	935.359	5.34732	1.15676	4.62266	3.7885e-06	6.48131e-05	Up
AI593442	538.825	12.1738	3.40165	3.5788	0.000345175	0.00245917	Up	A730017C20Rik	32.5023	5.87255	2.0924	2.80661	0.00500659	0.0251556	Up	AA474331	31.8379	8.31415	2.97586	2.79387	0.00520813	0.0337013	Up
AI661453	82.0234	3.83596	1.14596	3.34738	0.000815791	0.00521907	Up	A730020E08Rik	59.3088	4.96937	1.60428	3.09756	0.0019512	0.0113888	Up	AI593442	617.658	11.1576	1.88918	5.90606	3.50395e-09	1.11148e-07	Up
AI854517	27.9979	7.90682	2.8715	2.75355	0.0058953	0.0281501	Up	A830010M20Rik	328.306	2.19596	1.00404	2.18711	0.0287344	0.102253	Up	AI854517	32.1073	8.32622	3.06455	2.71695	0.00658875	0.0405991	Up
AK129341	65.5662	9.13464	2.20812	4.13683	3.52136e-05	0.000322026	Up	A930011O12Rik	52.3867	8.95573	2.03056	4.41048	1.03143e-05	0.00011331	Up	AU021092	2837.49	1.82573	0.270075	6.76008	1.37918e-11	6.30612e-10	Up
AU021092	2052.86	3.84646	0.331473	11.6041	3.92634e-31	3.08716e-29	Up	A930038C07Rik	1184.25	1.5507	0.496132	3.12558	0.00177456	0.0105053	Up	AU022252	261.692	1.90832	0.768186	2.48419	0.0129846	0.0702071	Up
AW551984	54.7139	8.87359	2.71607	3.26707	0.00108668	0.00672799	Up	AA474331	33.7381	3.34669	1.59595	2.09699	0.0359941	0.121109	Up	AU040320	754.928	1.32018	0.512038	2.57829	0.00992902	0.0564102	Up
AW555464	143.094	8.84381	1.92614	4.59147	4.40129e-06	4.911e-05	Up	AI414108	178.233	4.87322	1.4374	3.39031	0.000698134	0.00471348	Up	AW549877	1448.48	0.926794	0.380601	2.43508	0.0148885	0.0779548	Up
Aars2	190.946	1.4384	0.678744	2.1192	0.0340734	0.116351	Up	AI480653	497.682	1.00497	0.41975	2.39421	0.0166561	0.0667112	Up	AW551984	62.6747	9.29132	2.83447	3.27798	0.00104554	0.0088804	Up
Aasdhppt	397.221	1.82145	0.519081	3.50898	0.000449825	0.00310559	Up	AI593442	595.628	11.0442	2.51812	4.38589	1.1551e-05	0.000125463	Up	Aamp	2162.41	0.579533	0.271706	2.13294	0.0329299	0.142724	Up
Abca1	17585.9	1.80764	0.150009	12.0503	1.93311e-33	1.63882e-31	Up	AI661453	96.8059	2.9151	0.812698	3.58694	0.000334585	0.00251021	Up	Aars	1891.4	0.665296	0.326927	2.035	0.0418509	0.169564	Up
Abca2	455.493	2.06342	0.625266	3.30007	0.000966619	0.00607389	Up	AI848100	1480.62	0.745306	0.224445	3.32066	0.000898039	0.00585495	Up	Abat	631.724	3.4851	1.2215	2.85313	0.00432912	0.0291789	Up
Abca5	281.262	4.74056	1.48921	3.18328	0.00145616	0.00858476	Up	AU021092	2218.19	4.83073	0.242801	19.8958	4.42052e-88	1.21406e-85	Up	Abca1	18478.2	2.53972	0.212861	11.9313	8.12635e-33	1.39024e-30	Up
Abcb1a	9220.54	7.71856	1.68376	4.58412	4.55904e-06	5.06097e-05	Up	AU022252	300.574	0.988498	0.473513	2.08758	0.0368355	0.123454	Up	Abca2	585.031	1.3818	0.57575	2.39999	0.0163955	0.084025	Up
Abcb1b	26.0671	7.80378	3.42257	2.2801	0.022602	0.0846158	Up	Aagab	480.303	1.02617	0.394447	2.60155	0.00928033	0.0416856	Up	Abca3	2249.04	0.667275	0.277505	2.40456	0.0161921	0.0831879	Up
Abcb6	230.041	1.87744	0.665521	2.821	0.00478738	0.0237026	Up	Aasdhppt	499.82	1.15856	0.435942	2.6576	0.00786992	0.0364028	Up	Abca5	370.303	2.41083	0.740627	3.25512	0.00113344	0.0094823	Up
Abcc4	2459.58	2.53291	0.245948	10.2986	7.15257e-25	4.44837e-23	Up	Abat	623.448	3.1336	0.852579	3.67543	0.000237445	0.00185094	Up	Abcb1a	10577.6	11.504	2.15378	5.3413	9.22845e-08	2.33022e-06	Up
Abcc6	333.557	11.482	1.5723	7.30268	2.82083e-13	8.34427e-12	Up	Abca1	16644.6	3.46836	0.144166	24.0582	6.85841e-128	3.90675e-125	Up	Abcb9	62.7473	5.8775	1.90799	3.08046	0.00206679	0.0157322	Up
Abcc8	16.1235	7.11051	3.57652	1.98811	0.0467995	0.148823	Up	Abca2	487.031	2.38434	0.503594	4.73465	2.19434e-06	2.83605e-05	Up	Abcc4	3214	1.59887	0.223188	7.16378	7.84801e-13	4.26764e-11	Up
Abcd2	103.136	9.78821	2.09599	4.66997	3.0125e-06	3.45637e-05	Up	Abca5	339.684	2.97568	0.548274	5.42737	5.71911e-08	9.57126e-07	Up	Abcc6	384.215	11.9077	1.60369	7.42521	1.12598e-13	6.67086e-12	Up
Abcd3	2280.9	1.66842	0.350994	4.75341	2.00013e-06	2.38428e-05	Up	Abcb1a	11692	2.81264	0.126005	22.3217	2.27344e-110	1.0284e-107	Up	Abcc8	18.4739	7.52866	3.828	1.96673	0.0492138	0.190669	Up
Abcf2	972.008	0.739505	0.31596	2.3405	0.019258	0.0746707	Up	Abcb6	286.679	1.24244	0.47283	2.62767	0.0085972	0.0392343	Up	Abcd3	2818.59	1.2825	0.25328	5.06358	4.11453e-07	8.90089e-06	Up
Abcg2	3851.46	2.24087	0.225781	9.92499	3.24131e-23	1.86314e-21	Up	Abcb9	65.5426	3.36878	0.998865	3.37261	0.000744604	0.00498347	Up	Abcg1	3611.61	2.12578	0.254194	8.36284	6.1228e-17	4.70837e-15	Up
Abcg4	153.155	7.7921	1.9217	4.0548	5.01779e-05	0.000442189	Up	Abcc4	2493.28	3.91811	0.31118	12.5912	2.362e-36	2.13692e-34	Up	Abcg2	5864.09	0.736003	0.19272	3.81903	0.000133976	0.00150994	Up
Abhd12	303.104	1.43241	0.65226	2.19608	0.0280865	0.0999325	Up	Abcc6	371.814	11.7836	1.52299	7.73714	1.01677e-14	3.39955e-13	Up	Abcg4	174.625	10.7698	2.28702	4.7091	2.48811e-06	4.44648e-05	Up
Abhd15	38.2711	8.35794	2.48987	3.35678	0.000788551	0.00507045	Up	Abcd3	2768.4	1.20902	0.191925	6.29944	2.98722e-10	6.73659e-09	Up	Abhd2	8147.82	3.96463	0.340513	11.6431	2.48803e-31	3.98766e-29	Up
Abhd2	6984.06	4.29372	0.214208	20.0447	2.24734e-89	6.82069e-87	Up	Abcg1	3681.75	1.7603	0.1845	9.54092	1.41573e-21	7.23386e-20	Up	Abhd6	619.746	2.23645	0.457584	4.88751	1.02117e-06	1.99594e-05	Up
Abhd5	975.433	1.30904	0.346032	3.78299	0.000154959	0.00121524	Up	Abcg2	4578.77	1.78152	0.154979	11.4952	1.39403e-30	1.07201e-28	Up	Abhd8	355.943	1.5764	0.746559	2.11156	0.0347245	0.14839	Up
Abhd6	637.08	1.19792	0.443936	2.69841	0.00696709	0.0323419	Up	Abcg4	168.374	10.6405	3.58246	2.97017	0.00297635	0.016337	Up	Abi3bp	26.8985	6.58713	2.66405	2.4726	0.0134134	0.0719634	Up
Abl2	2267.84	0.79718	0.292871	2.72195	0.00648973	0.0305086	Up	Abhd1	185.876	1.48866	0.568681	2.61775	0.00885126	0.0400625	Up	Ablim1	15056.5	2.89076	0.177307	16.3037	9.29638e-60	3.53867e-57	Up
Ablim1	11710.1	5.86777	0.329697	17.7975	7.38992e-71	1.60203e-68	Up	Abhd12	330.177	1.54296	0.554458	2.78283	0.00538873	0.0267064	Up	Ablim3	194.009	4.72962	1.27076	3.72188	0.000197744	0.00212032	Up
Ablim2	51.4914	8.78612	2.24946	3.90589	9.38803e-05	0.000778063	Up	Abhd13	1203.37	0.673011	0.24388	2.7596	0.00578722	0.0284006	Up	Acad11	505.597	1.46618	0.723964	2.02521	0.0428455	0.17231	Up
Ablim3	171.37	4.1475	1.55276	2.67106	0.00756123	0.0346756	Up	Abhd2	8888.26	2.3278	0.115382	20.1747	1.6319e-90	4.73559e-88	Up	Acadl	2830.8	0.900048	0.394337	2.28243	0.0224639	0.107389	Up
Acadl	2387.64	1.01542	0.325937	3.11537	0.00183714	0.0104999	Up	Abhd5	1181.15	0.933006	0.304435	3.06471	0.00217881	0.01256	Up	Acan	38.1343	8.57458	4.15245	2.06495	0.0389282	0.160672	Up
Acadsb	861.745	0.878539	0.436466	2.01285	0.0441306	0.142243	Up	Abhd6	578.127	2.57101	0.359784	7.14598	8.93554e-13	2.57357e-11	Up	Acap1	22.3468	6.31423	2.85536	2.21136	0.0270108	0.123429	Up
Acadvl	1271.7	1.02108	0.349839	2.91872	0.00351474	0.0182408	Up	Abhd8	356.436	1.3823	0.593141	2.33047	0.0197811	0.0762682	Up	Accn1	40.1282	8.64812	4.09956	2.10952	0.0348993	0.149012	Up
Acan	33.2992	8.15726	3.93945	2.07066	0.0383909	0.127591	Up	Abi2	2078.97	0.75871	0.265385	2.8589	0.00425115	0.0218964	Up	Accn2	196.143	2.26516	1.04167	2.17456	0.0296633	0.13214	Up
Acbd5	1485.52	0.943811	0.261105	3.61468	0.000300714	0.00217613	Up	Abl2	2684.64	0.57271	0.186244	3.07505	0.00210468	0.0121875	Up	Ache	59.5243	6.22246	2.32338	2.6782	0.00740199	0.0447777	Up
Acbd6	260.341	1.51904	0.668127	2.27359	0.0229908	0.0856792	Up	Ablim1	19691.7	0.90722	0.110664	8.198	2.44411e-16	9.16839e-15	Up	Acn9	16.7937	7.39132	3.69195	2.00201	0.045284	0.179696	Up
Acnat1	354.157	1.56126	0.522659	2.98715	0.00281588	0.0150726	Up	Acaa2	798.864	0.970909	0.346456	2.8024	0.00507233	0.0253864	Up	Acnat1	363.464	2.37199	0.724567	3.27367	0.00106161	0.00898003	Up
Aco2	3364.95	0.647062	0.306265	2.11275	0.0346223	0.117907	Up	Acadl	2733.37	0.913588	0.295982	3.08664	0.00202434	0.011771	Up	Aco1	1378.15	0.835031	0.366599	2.27777	0.02274	0.108607	Up
Acot1	154.075	10.3676	1.72702	6.00318	1.93493e-09	3.78383e-08	Up	Acadvl	1413.87	1.02877	0.259136	3.96999	7.18762e-05	0.000644957	Up	Acot13	164.248	3.89194	1.17232	3.31986	0.000900634	0.00780925	Up
Acot6	15.7142	7.07393	3.26898	2.16396	0.0304678	0.106238	Up	Acbd5	1807.61	0.60215	0.248777	2.42044	0.0155018	0.0628408	Up	Acox1	5514.76	1.29131	0.381819	3.382	0.000719595	0.00645642	Up
Acot7	207.483	3.8146	0.993579	3.83926	0.000123408	0.000996657	Up	Accn1	38.6818	8.51828	3.44984	2.46918	0.0135422	0.0563525	Up	Acsbg1	73.4764	5.0966	2.02683	2.51457	0.0119177	0.0654379	Up
Acox1	4723.31	1.35985	0.174236	7.80464	5.96707e-15	2.04403e-13	Up	Acnat1	367.349	2.01819	0.441291	4.57337	4.79951e-06	5.69133e-05	Up	Acsl1	1124.15	1.19725	0.496294	2.41238	0.0158488	0.0817461	Up
Acsbg1	62.2157	9.05895	2.24541	4.03443	5.47339e-05	0.000478449	Up	Aco1	1461.74	0.493964	0.218054	2.26533	0.0234924	0.0874224	Up	Acsl3	1497.67	1.86635	0.363429	5.13539	2.81567e-07	6.37966e-06	Up
Acsl1	914.843	1.5246	0.389908	3.91015	9.22385e-05	0.000765292	Up	Acot1	254.563	1.04617	0.520047	2.01169	0.0442527	0.141971	Up	Acsl6	213.8	11.0618	2.13466	5.18201	2.19507e-07	5.11043e-06	Up
Acsl3	1170.49	2.76893	0.68554	4.03905	5.36679e-05	0.000470321	Up	Acox1	4818.82	1.87856	0.149337	12.5794	2.74183e-36	2.46605e-34	Up	Actl6b	24.655	7.94515	3.34035	2.37854	0.0173816	0.0878505	Up
Acsl6	186.936	9.16331	1.98894	4.60713	4.0827e-06	4.58246e-05	Up	Acox3	859.005	0.758593	0.327895	2.31353	0.0206936	0.0791712	Up	Actn1	3615.99	1.7557	0.209332	8.38716	4.98048e-17	3.86902e-15	Up
Acss3	144.88	8.8172	1.68429	5.23497	1.65014e-07	2.42174e-06	Up	Acp2	1005.69	0.680474	0.289106	2.35372	0.0185866	0.0726645	Up	Actr1a	3375.43	0.861454	0.225135	3.82639	0.000130038	0.00147347	Up
Actb	50724.6	0.606002	0.158073	3.83368	0.000126239	0.00101681	Up	Acp5	68.6069	9.34599	1.9129	4.88577	1.03027e-06	1.41985e-05	Up	Actr1b	1191.92	1.12097	0.334574	3.35044	0.000806827	0.00710923	Up
Actg1	32706.5	0.831119	0.130883	6.35009	2.15184e-10	4.74625e-09	Up	Acpl2	11.8092	6.80629	3.19151	2.13263	0.0329554	0.113466	Up	Actr3b	19.9936	7.64334	3.40345	2.24577	0.024719	0.115985	Up
Actn1	3648.57	0.980159	0.291881	3.35808	0.000784863	0.00505134	Up	Acsbg1	68.9281	9.35149	2.03005	4.60654	4.09429e-06	4.93111e-05	Up	Adam10	14759.6	0.800911	0.155921	5.13664	2.79696e-07	6.34673e-06	Up
Actr10	1247.66	1.04116	0.324389	3.20961	0.00132915	0.00795602	Up	Acsl1	967.467	1.85668	0.335966	5.52641	3.26853e-08	5.67382e-07	Up	Adam17	3593.47	0.814188	0.223443	3.64384	0.000268605	0.00278976	Up
Actr1a	3208.25	0.520082	0.201138	2.58569	0.00971834	0.0427776	Up	Acsl3	1425.26	1.98303	0.269364	7.36187	1.81345e-13	5.5449e-12	Up	Adam22	506.559	1.90902	0.855391	2.23175	0.0256316	0.118911	Up
Actr1b	991.17	1.32807	0.33263	3.99264	6.53421e-05	0.000560523	Up	Acsl6	206.184	10.9328	3.28329	3.32983	0.000869004	0.00568978	Up	Adam23	496.417	7.6274	1.33187	5.72685	1.02313e-08	3.04856e-07	Up
Actr3	8628.84	0.835365	0.150921	5.5351	3.11047e-08	5.1139e-07	Up	Acss3	166.266	4.88366	1.06208	4.59821	4.26142e-06	5.10436e-05	Up	Adamts15	44.868	8.80919	2.62676	3.35364	0.000797568	0.00704395	Up
Actr3b	17.3595	7.21783	3.13526	2.30215	0.0213266	0.0807664	Up	Actb	62951.5	0.242237	0.100433	2.41192	0.0158688	0.0641089	Up	Adamts3	234.098	3.4257	1.49159	2.29668	0.0216371	0.104091	Up
Actr5	29.4318	7.97981	2.6184	3.04758	0.00230689	0.0127252	Up	Actl6b	23.7874	7.81632	2.70856	2.88579	0.00390437	0.0203695	Up	Adamts8	178.607	10.8026	1.77869	6.07334	1.25279e-09	4.22011e-08	Up
Acvrl1	2171.67	2.05417	0.413923	4.96269	6.95247e-07	9.04059e-06	Up	Actn1	4603	0.505073	0.180063	2.80498	0.00503192	0.0252499	Up	Adamtsl2	2314.7	5.43651	0.551041	9.86588	5.85176e-23	6.50357e-21	Up
Acy1	23.9301	5.33901	2.3217	2.29961	0.0214701	0.0812329	Up	Actr10	1628.01	0.435857	0.214852	2.02864	0.0424949	0.137623	Up	Adcy1	952.123	4.3096	1.02561	4.202	2.64561e-05	0.000361968	Up
Adam10	11560.2	1.24835	0.149464	8.35217	6.70178e-17	2.68336e-15	Up	Actr1a	3808.11	0.308162	0.154689	1.99214	0.0463557	0.147121	Up	Adcy2	43.1281	8.7522	2.63038	3.32736	0.000876743	0.00762817	Up
Adam17	3148.98	0.775638	0.196812	3.94102	8.11366e-05	0.000683647	Up	Actr1b	1341.38	0.519492	0.253195	2.05175	0.0401944	0.131951	Up	Adcy7	27.7166	5.59248	2.52213	2.21737	0.0265981	0.122093	Up
Adam22	352.622	6.47414	1.3623	4.75235	2.01065e-06	2.39307e-05	Up	Actr2	9309.85	0.543329	0.110395	4.92169	8.57985e-07	1.19744e-05	Up	Adcy8	27.3717	8.096	3.19577	2.53335	0.0112978	0.0628039	Up
Adamts12	323.12	2.26528	0.675757	3.3522	0.000801713	0.00514418	Up	Actr3	10262.9	0.591029	0.119347	4.95218	7.33878e-07	1.03646e-05	Up	Adcyap1r1	305.54	3.81872	1.83861	2.07695	0.0378058	0.157243	Up
Adamts15	41.2616	4.12242	2.07188	1.9897	0.0466241	0.148452	Up	Actr3b	19.3468	7.5191	2.6415	2.84653	0.00441981	0.0226239	Up	Add3	3511.26	0.783244	0.227298	3.44589	0.000569174	0.00531345	Up
Adamts3	191.707	5.31494	1.92067	2.76723	0.00565346	0.0272474	Up	Adam10	11898.7	1.68661	0.145287	11.6088	3.71819e-31	2.88817e-29	Up	Adh1	252.607	5.20711	0.958254	5.43396	5.51173e-08	1.43701e-06	Up
Adamts8	155.094	10.3772	1.71511	6.05046	1.4443e-09	2.87628e-08	Up	Adam17	3631.69	0.648568	0.185521	3.49593	0.000472419	0.00337944	Up	Adipor1	3967.78	1.56182	0.239058	6.5332	6.43785e-11	2.67092e-09	Up
Adamts9	1938.63	0.583729	0.228388	2.55586	0.0105926	0.0459923	Up	Adam22	421.793	3.43865	0.770385	4.46354	8.06168e-06	9.09675e-05	Up	Adm	520.41	1.55558	0.543398	2.86268	0.00420069	0.0284392	Up
Adamtsl2	1987.32	6.31419	0.687646	9.18233	4.21871e-20	2.06513e-18	Up	Adamts16	27.4126	5.46132	2.38644	2.28848	0.0221096	0.083324	Up	Adora1	50.4019	6.56662	2.43943	2.69187	0.00710525	0.0431875	Up
Adap1	14.1268	6.92065	3.38318	2.0456	0.0407956	0.134028	Up	Adamts3	206.489	10.9349	3.7391	2.92448	0.00345036	0.0184323	Up	Adra2b	30.2876	8.24215	3.01243	2.73605	0.00621817	0.0388183	Up
Adcy1	790.884	12.7275	3.19691	3.98118	6.85748e-05	0.000585606	Up	Adamts4	294.535	1.37755	0.612393	2.24946	0.0244835	0.0902797	Up	Agfg1	2577.14	1.27779	0.259252	4.92877	8.27483e-07	1.6578e-05	Up
Adcy2	37.5224	8.32955	2.45497	3.39293	0.000691498	0.00452306	Up	Adamts8	225.411	1.71606	0.525761	3.26395	0.0010987	0.0069884	Up	Agl	540.762	1.63709	0.585593	2.79562	0.00518004	0.033585	Up
Adcy3	95.7416	2.28664	1.1269	2.02915	0.042443	0.138154	Up	Adamtsl2	2521	2.72963	0.255055	10.7021	9.94725e-27	6.48257e-25	Up	Agpat3	1607.43	1.02091	0.340061	3.00213	0.002681	0.0194841	Up
Adcy5	65.2166	3.98349	1.71584	2.3216	0.0202544	0.0776341	Up	Adcy1	878.673	7.6021	2.78564	2.72904	0.00635197	0.0306345	Up	Agrn	21221.7	1.04265	0.123604	8.43541	3.3005e-17	2.59038e-15	Up
Adcy8	23.8627	7.67626	2.98195	2.57424	0.010046	0.0439713	Up	Adcy5	70.9291	4.48288	1.51888	2.95144	0.00316293	0.0171954	Up	Ahcyl1	2898.67	1.52533	0.331053	4.60752	4.07509e-06	6.9095e-05	Up
Adcy9	293.043	1.6686	0.849322	1.96463	0.0494569	0.154968	Up	Adcyap1r1	275.272	11.3495	1.80068	6.30291	2.92116e-10	6.60698e-09	Up	Aifm3	83.5142	8.26811	1.99346	4.14762	3.35948e-05	0.000446737	Up
Adcyap1r1	249.529	8.53376	1.56527	5.45193	4.9827e-08	7.9592e-07	Up	Adi1	619.86	0.955271	0.330028	2.89452	0.00379738	0.0199111	Up	Ajap1	62.6416	6.19337	2.07581	2.98359	0.00284885	0.0205284	Up
Adh5	1422.71	0.705586	0.276613	2.55081	0.0107474	0.0465722	Up	Adipor1	4201.47	1.1067	0.156586	7.06772	1.57505e-12	4.47924e-11	Up	Ak4	331.031	3.67284	1.26073	2.91325	0.00357687	0.0248658	Up
Adi1	545.687	1.03633	0.40678	2.54765	0.0108453	0.0469081	Up	Adm	400.024	3.9641	0.436131	9.08925	9.97234e-20	4.56472e-18	Up	Akap2	14639	0.551175	0.157205	3.50608	0.000454763	0.00439075	Up
Adora1	43.5323	8.54367	2.70402	3.15962	0.00157974	0.00922374	Up	Adora2a	480.789	1.02289	0.422881	2.41887	0.0155687	0.0630788	Up	Akap6	762.47	10.4763	1.45853	7.18278	6.83056e-13	3.75459e-11	Up
Adss	2872.45	0.808148	0.279907	2.88721	0.0038868	0.0198593	Up	Adra2b	30.1813	5.00064	2.03414	2.45836	0.0139575	0.0576904	Up	Akr1c14	960.078	2.55037	0.650908	3.91817	8.92223e-05	0.00105802	Up
Afap1	683.676	1.4961	0.443698	3.37188	0.000746574	0.00484571	Up	Adss	3363.15	0.627729	0.215487	2.91307	0.00357896	0.0189874	Up	Alas1	1573.05	2.69334	0.303234	8.88207	6.56281e-19	5.98355e-17	Up
Afap1l1	5895.2	0.634162	0.161307	3.9314	8.44518e-05	0.000708434	Up	Afap1l2	925.888	1.33525	0.350308	3.81164	0.000138049	0.00115203	Up	Alcam	514.006	1.59266	0.759643	2.09659	0.0360301	0.152387	Up
Afap1l2	723.121	2.22688	0.675431	3.29698	0.000977304	0.00612834	Up	Agap2	60.1841	6.64479	1.64807	4.03187	5.53351e-05	0.000512375	Up	Aldh1a1	75.5428	7.14394	1.81789	3.92979	8.50188e-05	0.0010137	Up
Aff2	41.8194	8.48619	2.33156	3.63971	0.000272944	0.00200383	Up	Agrn	21745.7	0.804553	0.10319	7.79682	6.34884e-15	2.15229e-13	Up	Aldh1a7	67.3172	9.39518	2.30546	4.07518	4.59792e-05	0.000589789	Up
Agfg1	2073.36	1.69686	0.250584	6.77163	1.27342e-11	3.19408e-10	Up	Agtpbp1	1028.08	0.66527	0.30109	2.20953	0.0271375	0.0978373	Up	Aldh1l1	74.2577	4.3455	1.58122	2.74819	0.00599254	0.0377035	Up
Agrn	14697.4	2.43184	0.119231	20.396	1.81626e-92	6.12484e-90	Up	Ahcyl1	2827.89	1.47783	0.218474	6.76429	1.3396e-11	3.48025e-10	Up	Aldh9a1	1456.78	1.76289	0.426486	4.13354	3.57221e-05	0.000469693	Up
Ahcy	255.676	1.57068	0.634513	2.47542	0.0133081	0.0553441	Up	Ahcyl2	1147.81	1.52367	0.255779	5.95699	2.5693e-09	5.21317e-08	Up	Aldoc	1077.23	6.7167	1.94149	3.45956	0.000541051	0.00507894	Up
Ahcyl1	2962.32	0.773284	0.252431	3.06335	0.00218878	0.0121443	Up	Ahi1	270.135	1.95975	0.758727	2.58295	0.009796	0.0435189	Up	Alg6	303.433	2.05321	0.725752	2.82908	0.00466827	0.030904	Up
Ahcyl2	1188.08	0.851825	0.416527	2.04506	0.0408486	0.134173	Up	Aif1l	538.057	1.47957	0.438607	3.37334	0.000742612	0.00497446	Up	Amd2	2185.22	0.651078	0.27643	2.35531	0.0185072	0.0924042	Up
Ahi1	214.765	3.14389	0.842553	3.73139	0.000190427	0.00145799	Up	Aifm3	81.5628	6.19985	1.37165	4.51998	6.18451e-06	7.1196e-05	Up	Amfr	2858.91	0.646757	0.287814	2.24713	0.0246315	0.115789	Up
Aif1l	372.516	4.38116	0.605606	7.23434	4.67803e-13	1.33188e-11	Up	Ajap1	61.8222	4.79306	1.77285	2.70359	0.00685944	0.032501	Up	Ammecr1l	2388.93	0.740925	0.342514	2.1632	0.0305261	0.134745	Up
Aifm3	78.1389	3.63248	1.81762	1.99848	0.0456651	0.145857	Up	Ak4	302.754	5.56987	0.952254	5.84914	4.94122e-09	9.66869e-08	Up	Amph	170.885	10.7385	2.11312	5.08183	3.73816e-07	8.20945e-06	Up
Ak3	1460.34	1.25783	0.300734	4.18255	2.88258e-05	0.000268692	Up	Akap2	13428.3	0.750822	0.14717	5.10174	3.36547e-07	5.02773e-06	Up	Angpt2	1304.35	1.68113	0.383573	4.38282	1.17151e-05	0.000176959	Up
Ak4	280.2	4.35327	1.55888	2.79255	0.00522937	0.0255491	Up	Akap6	748.006	5.83105	1.88599	3.09176	0.00198971	0.0115784	Up	Angptl4	1552.52	3.99838	0.349997	11.4241	3.17087e-30	4.78017e-28	Up
Ak7	38.0979	4.68902	2.0819	2.25228	0.0243049	0.089261	Up	Akr1c14	897.732	2.92493	0.304032	9.62047	6.55328e-22	3.43991e-20	Up	Ank	456.189	2.78743	0.988143	2.82088	0.00478921	0.03154	Up
Akap13	4360.35	1.52201	0.201696	7.54607	4.48596e-14	1.41822e-12	Up	Alas1	1882.34	1.22645	0.19679	6.23224	4.59806e-10	1.01461e-08	Up	Ank1	216.492	11.0799	2.10607	5.26092	1.43336e-07	3.4624e-06	Up
Akap17b	115.71	1.77687	0.85414	2.0803	0.037498	0.125393	Up	Alcam	517.074	1.37221	0.543445	2.52501	0.0115694	0.0496891	Up	Ank2	765.458	3.11574	1.10953	2.80817	0.00498239	0.0325029	Up
Akap6	665.657	9.28973	2.27044	4.0916	4.28407e-05	0.000382416	Up	Aldh1l1	68.3084	9.33845	2.09194	4.46401	8.04409e-06	9.08357e-05	Up	Ankrd13a	3264.78	0.735797	0.254091	2.89581	0.00378187	0.0260438	Up
Akr1c14	712.253	12.5764	1.51187	8.31843	8.91394e-17	3.50438e-15	Up	Aldh4a1	568.33	1.80574	0.525085	3.43894	0.000583989	0.0040568	Up	Ankrd13d	43.5628	8.76652	3.33568	2.62811	0.0085861	0.0504756	Up
Alas1	1394.76	2.4749	0.401631	6.16214	7.17692e-10	1.48987e-08	Up	Aldh9a1	1531.63	1.30362	0.308816	4.22133	2.42866e-05	0.000244775	Up	Ankrd37	561.647	3.40659	0.506409	6.72695	1.73255e-11	7.75876e-10	Up
Alcam	384.944	2.77787	0.67597	4.10946	3.96589e-05	0.000358667	Up	Aldoa	2436.7	1.15479	0.260681	4.42989	9.42796e-06	0.000104695	Up	Ankrd45	55.3321	9.11167	3.79717	2.3996	0.0164131	0.0840675	Up
Aldh18a1	433.723	1.17087	0.597396	1.95996	0.05	0.156305	Up	Aldob	29.6231	6.61426	3.22183	2.05296	0.0400769	0.131678	Up	Anks1	1340.31	0.900771	0.438748	2.05305	0.0400679	0.164043	Up
Aldh1a2	25.8655	7.79288	2.74776	2.83609	0.00456697	0.0227598	Up	Aldoc	1054.03	5.36408	1.64541	3.26003	0.00111401	0.00707992	Up	Anks1b	262.531	5.1732	1.53502	3.37013	0.00075134	0.00670176	Up
Aldh1a7	61.9368	4.01636	1.94661	2.06326	0.0390881	0.129568	Up	Alg2	741.625	0.97157	0.446583	2.17556	0.0295878	0.10442	Up	Anxa3	4320.31	1.21227	0.243753	4.97336	6.58032e-07	1.35395e-05	Up
Aldh9a1	1431.13	1.0984	0.344063	3.19244	0.00141075	0.00835929	Up	Alkbh5	4250.63	0.397042	0.139572	2.84471	0.00444524	0.0227362	Up	Anxa6	9129.63	0.552543	0.232227	2.37932	0.0173445	0.0877659	Up
Aldoc	931.588	11.4493	2.51284	4.55632	5.20568e-06	5.70153e-05	Up	Alpk1	164.008	2.06774	0.795165	2.60039	0.00931179	0.0417781	Up	Aox1	49.1481	8.94139	2.5591	3.49396	0.000475917	0.00455096	Up
Alg2	584.076	1.6341	0.516327	3.16486	0.00155156	0.00909071	Up	Alpk2	35.5071	8.39453	2.96901	2.82738	0.00469306	0.0237902	Up	Ap1s2	790.704	1.00163	0.47686	2.10047	0.0356877	0.151459	Up
Alkbh5	3750.94	0.451271	0.181336	2.48859	0.012825	0.05377	Up	Amacr	106.838	2.71586	0.805547	3.37144	0.00074775	0.00499583	Up	Ap2a1	2502.02	0.703753	0.290483	2.4227	0.0154058	0.0799485	Up
Amd2	1630.77	1.29849	0.272759	4.76057	1.9305e-06	2.31401e-05	Up	Amdhd1	21.4594	7.6689	2.55527	3.00121	0.00268913	0.015042	Up	Ap2a2	3319.43	1.05116	0.299472	3.51004	0.000448043	0.00434793	Up
Amfr	2505.74	0.612739	0.250536	2.44572	0.0144565	0.0592751	Up	Ammecr1l	2488	0.474772	0.186954	2.53951	0.0111007	0.0480044	Up	Ap2b1	6983.46	0.971137	0.200853	4.83505	1.33109e-06	2.54933e-05	Up
Ammecr1l	2010.99	0.861112	0.246807	3.48901	0.00048481	0.00332895	Up	Amot	1766.1	1.27892	0.210767	6.06795	1.2955e-09	2.7407e-08	Up	Ap2m1	4744.22	0.451243	0.194236	2.32317	0.0201702	0.0983701	Up
Amph	149.424	8.84175	1.9557	4.52101	6.15458e-06	6.60975e-05	Up	Amph	198.044	2.31169	1.08834	2.12405	0.0336658	0.115296	Up	Ap3b2	196.433	10.9396	2.16377	5.05579	4.28609e-07	9.2175e-06	Up
Amt	78.8332	2.41871	1.08096	2.23756	0.0252501	0.0919261	Up	Amt	77.7797	4.38041	1.18084	3.70957	0.000207608	0.00164758	Up	Ap3s1	1173.27	0.850717	0.347088	2.45102	0.0142453	0.0753123	Up
Angptl4	1396.88	3.29811	0.481529	6.84925	7.42378e-12	1.89976e-10	Up	Angpt2	1258.44	1.6961	0.308473	5.49836	3.83336e-08	6.5805e-07	Up	Apba1	324.191	2.10338	0.999745	2.10392	0.0353857	0.150456	Up
Ank	393.305	2.87904	0.574986	5.00715	5.5243e-07	7.36007e-06	Up	Angptl4	1525.89	3.66139	0.227605	16.0866	3.16508e-58	5.12409e-56	Up	Apbb3	135.099	2.20105	1.06401	2.06864	0.0385801	0.159452	Up
Ank2	598.734	12.3259	3.05229	4.03826	5.38489e-05	0.000471256	Up	Ank1	216.748	4.72148	1.3579	3.47704	0.000506988	0.00359	Up	Apcdd1	25791	8.15348	0.261074	31.2305	4.11031e-214	1.56459e-210	Up
Ank3	461.508	4.60286	0.917325	5.0177	5.22936e-07	7.00402e-06	Up	Ank2	750.703	2.90011	0.923465	3.14046	0.00168681	0.0100907	Up	Apeh	338.544	1.41009	0.610734	2.30885	0.0209519	0.101403	Up
Ankrd13a	2840.6	0.726012	0.196984	3.68565	0.000228122	0.00170825	Up	Ank3	515.906	4.28219	0.826373	5.18191	2.19621e-07	3.35762e-06	Up	Aph1a	2623.76	0.701626	0.263134	2.66642	0.00766645	0.0460652	Up
Ankrd28	1441.7	1.67104	0.299258	5.58394	2.35127e-08	3.92524e-07	Up	Ankhd1	4526.02	0.403078	0.190228	2.11892	0.034097	0.116303	Up	Aph1b	120.385	22.9463	3.26509	7.02776	2.09878e-12	1.0652e-10	Up
Ankrd37	489.391	3.33244	0.462082	7.21179	5.52227e-13	1.56636e-11	Up	Ankrd17	7755.18	0.289195	0.128393	2.25242	0.0242954	0.0897799	Up	Apln	11388.9	3.29417	0.27049	12.1785	4.04442e-34	7.24474e-32	Up
Anks1b	224.247	7.32283	1.53894	4.75836	1.95167e-06	2.33386e-05	Up	Ankrd28	2015.12	0.631551	0.232709	2.71391	0.00664948	0.0317902	Up	Aplp2	22264.8	0.735408	0.136515	5.38701	7.16406e-08	1.83636e-06	Up
Anks6	49.98	8.7434	2.20844	3.95908	7.52393e-05	0.000636431	Up	Ankrd37	642.049	1.77473	0.492566	3.60303	0.000314526	0.00237477	Up	Apod	3155.04	11.1848	0.698751	16.0069	1.14367e-57	4.04967e-55	Up
Ano4	33.9701	8.18583	3.03197	2.69984	0.00693735	0.0322235	Up	Ankrd45	53.3377	8.98185	3.2498	2.76382	0.00571294	0.028054	Up	Apoe	3236.95	1.48323	0.485401	3.05569	0.00224545	0.0168286	Up
Ano6	1998.24	1.10385	0.234326	4.71073	2.46829e-06	2.88569e-05	Up	Anks1b	258.1	4.39291	1.14418	3.83934	0.000123365	0.00104711	Up	Arap2	2439.7	1.83122	0.332307	5.51062	3.57576e-08	9.6533e-07	Up
Antxr1	253.451	2.29025	0.639924	3.57894	0.000344986	0.00245897	Up	Anks6	68.2828	2.14281	0.997769	2.1476	0.0317452	0.110412	Up	Arf3	4513.3	0.425757	0.196654	2.16501	0.0303873	0.13429	Up
Anxa3	3275.96	1.99032	0.250349	7.95018	1.86238e-15	6.63417e-14	Up	Ano4	37.5153	8.47382	2.72755	3.10675	0.00189155	0.0110954	Up	Arhgap20	370.842	7.27357	1.25944	5.77524	7.6843e-09	2.3307e-07	Up
Anxa6	5711.49	2.24062	0.216024	10.3721	3.32168e-25	2.10906e-23	Up	Anxa1	811.824	1.44725	0.324664	4.45769	8.2846e-06	9.32093e-05	Up	Arhgap22	42.2317	6.21566	2.1996	2.82582	0.00471597	0.031179	Up
Ap1s2	690.903	0.968012	0.425305	2.27604	0.0228435	0.0853186	Up	Anxa3	5163.69	0.382639	0.189461	2.01961	0.0434235	0.139801	Up	Arhgap27	2203.06	0.731607	0.313441	2.33412	0.0195896	0.0961357	Up
Ap2a1	2120.56	0.798191	0.253969	3.14287	0.00167302	0.00969162	Up	Anxa6	8881.62	0.533612	0.137667	3.8761	0.000106142	0.000916087	Up	Arhgdig	30.7659	8.26488	2.94734	2.80419	0.00504438	0.032837	Up
Ap2b1	5648.89	1.29918	0.195168	6.65674	2.79973e-11	6.78688e-10	Up	Anxa7	1354.74	0.936975	0.311739	3.00564	0.00265025	0.0148437	Up	Arhgef12	17476.3	0.943849	0.157306	6.00008	1.97225e-09	6.48585e-08	Up
Ap3b2	171.418	10.5213	2.10875	4.98935	6.05823e-07	7.98729e-06	Up	Ap2a1	2558.38	0.503072	0.184328	2.72922	0.00634852	0.0306274	Up	Arhgef33	561.354	12.4546	3.28387	3.79266	0.000149042	0.0016625	Up
Ap3s1	991.401	0.963652	0.316356	3.0461	0.00231832	0.0127743	Up	Ap2b1	6733.67	0.985447	0.185486	5.31278	1.07962e-07	1.7387e-06	Up	Arhgef37	32.0969	8.32599	2.90217	2.86888	0.00411927	0.0279669	Up
Apba1	249.922	3.47354	1.01085	3.43626	0.000589799	0.00394282	Up	Ap2m1	4672.55	0.391851	0.137958	2.84037	0.00450619	0.0230011	Up	Arid3b	107.195	8.62852	1.89274	4.55875	5.14595e-06	8.45984e-05	Up
Apbb1	99.6439	8.26389	1.83873	4.49433	6.97885e-06	7.44231e-05	Up	Ap3b2	189.434	10.8106	3.29585	3.28005	0.00103788	0.00665385	Up	Arl10	62.2514	6.22043	1.68415	3.69351	0.00022118	0.0023403	Up
Apbb2	4777.01	0.648839	0.192734	3.3665	0.000761288	0.00492226	Up	Ap3s1	998.402	1.44581	0.264547	5.46522	4.62324e-08	7.83099e-07	Up	Arl2bp	3380.52	1.69009	0.359449	4.7019	2.57746e-06	4.58338e-05	Up
Apcdd1	22309.5	10.8713	1.82654	5.95186	2.65108e-09	5.08598e-08	Up	Apba1	302.868	2.37156	0.876261	2.70646	0.00680048	0.0323012	Up	Arl4a	2312.87	2.63665	0.286138	9.21458	3.12496e-20	3.10984e-18	Up
Aph1a	2227.89	0.785014	0.264718	2.96547	0.00302222	0.0159854	Up	Apbb2	4986.4	0.908454	0.155566	5.83965	5.23105e-09	1.01711e-07	Up	Arl5a	3164.88	0.839734	0.242975	3.45604	0.000548166	0.00513308	Up
Apln	9159.89	5.52002	0.218239	25.2935	3.7656e-141	2.11641e-138	Up	Apc2	137.11	2.89306	1.25989	2.29627	0.0216602	0.0820124	Up	Arl6ip1	5631.31	0.602942	0.211976	2.84438	0.00444979	0.0297682	Up
Aplnr	6434.17	5.61325	0.170588	32.9052	1.85188e-237	2.16172e-234	Up	Apcdd1	25465.6	5.41593	0.161344	33.5675	4.99473e-247	8.53544e-244	Up	Arpp21	55.1911	9.10808	2.41632	3.7694	0.000163641	0.00180551	Up
Aplp1	335.355	2.52111	0.84242	2.9927	0.00276518	0.0148274	Up	Apln	10622.2	4.0261	0.226245	17.7953	7.68316e-71	1.47709e-68	Up	Arsb	562.513	2.28561	0.637737	3.58394	0.000338456	0.00341733	Up
Aplp2	17994.7	1.02882	0.118821	8.65858	4.7769e-18	2.05884e-16	Up	Aplnr	12908.5	0.259483	0.108889	2.38299	0.0171726	0.0683044	Up	Arx	16.6986	7.3837	3.64768	2.02422	0.0429474	0.172591	Up
Apod	2738.6	10.5962	1.72952	6.12669	8.97273e-10	1.83506e-08	Up	Aplp1	379.42	2.33196	0.759456	3.07057	0.00213648	0.012353	Up	Arxes1	159.836	10.6422	1.85426	5.73932	9.50562e-09	2.84347e-07	Up
Apold1	4964.09	1.19569	0.240287	4.9761	6.48776e-07	8.50923e-06	Up	Aplp2	24088	0.341074	0.101347	3.36542	0.000764284	0.00509522	Up	Asap3	545.795	2.6518	0.646532	4.10158	4.10346e-05	0.000531739	Up
Apoo-ps	50.9281	8.77031	3.58756	2.44464	0.0144996	0.0593876	Up	Apod	3081.68	6.71936	1.0019	6.70666	1.99136e-11	5.08756e-10	Up	Asb4	503.135	3.61616	0.642119	5.63161	1.78539e-08	5.10025e-07	Up
Aprt	354.467	3.2969	0.660999	4.98775	6.10873e-07	8.04688e-06	Up	Apoe	2356.01	5.47128	0.403442	13.5615	6.77149e-42	7.18245e-40	Up	Ascl1	25.6068	7.99998	3.1691	2.52437	0.0115905	0.0641106	Up
Aqp11	159.913	4.12005	1.65046	2.49631	0.0125493	0.0529134	Up	Apold1	4190.08	3.54082	0.261125	13.5598	6.92842e-42	7.29857e-40	Up	Asns	330.991	1.4451	0.693518	2.08372	0.0371858	0.155461	Up
Aqp4	517.929	10.6523	1.75716	6.06222	1.34256e-09	2.6807e-08	Up	Aprt	501.974	1.34352	0.53966	2.48957	0.0127897	0.0539067	Up	Asphd2	25.7255	8.00745	3.16371	2.53103	0.0113727	0.0631512	Up
Arap2	1775.14	3.78335	1.24933	3.02831	0.00245927	0.0134436	Up	Aqp11	184.273	3.47341	1.05887	3.28032	0.00103691	0.0066504	Up	Astn1	753.812	3.56247	0.974404	3.65606	0.000256126	0.00268026	Up
Arf6	3543.65	0.979378	0.181511	5.3957	6.8255e-08	1.05799e-06	Up	Aqp4	574.397	8.12322	1.109	7.32479	2.39281e-13	7.25866e-12	Up	Astn2	345.381	4.67492	1.42782	3.27418	0.0010597	0.00897402	Up
Arfgef1	2628.41	0.525339	0.218485	2.40447	0.0161961	0.0648144	Up	Arf2	1338.91	0.511274	0.232324	2.20069	0.0277578	0.099649	Up	Atcay	105.889	5.51434	1.93416	2.85102	0.00435791	0.029307	Up
Arfip2	542.002	1.10742	0.423626	2.61414	0.00894514	0.0400184	Up	Arf3	4303.65	0.476612	0.182017	2.6185	0.0088318	0.0399969	Up	Ate1	2017.51	1.21172	0.328892	3.68424	0.000229387	0.00242208	Up
Arhgap18	4030.6	2.16043	0.208284	10.3725	3.30711e-25	2.10863e-23	Up	Arf6	4478.08	0.498867	0.143621	3.4735	0.000513713	0.00363093	Up	Atl2	2634.78	1.55087	0.282668	5.48654	4.09877e-08	1.0968e-06	Up
Arhgap20	321.279	11.4277	1.8193	6.28136	3.35614e-10	7.26526e-09	Up	Arfgef1	2934.05	0.519384	0.173065	3.00108	0.00269021	0.015042	Up	Atl3	5216.97	0.47816	0.182413	2.6213	0.00875955	0.0512108	Up
Arhgap22	36.1328	8.27564	2.43752	3.39511	0.000686007	0.00449488	Up	Arhgap18	5742.29	0.825475	0.163471	5.04969	4.42534e-07	6.50064e-06	Up	Atp10a	464.961	1.90537	0.628437	3.03192	0.00243002	0.0179784	Up
Arhgap27	1619.99	1.47793	0.516404	2.86197	0.00421023	0.0212755	Up	Arhgap27	2084.58	0.822739	0.257726	3.1923	0.00141145	0.00866937	Up	Atp11b	4793.2	1.435	0.295304	4.85939	1.17751e-06	2.27233e-05	Up
Arhgap28	783.58	1.60849	0.415093	3.87501	0.00010662	0.00087316	Up	Arhgap5	2673.31	0.641903	0.249626	2.57146	0.0101272	0.0447232	Up	Atp13a4	47.291	8.88495	2.70275	3.28737	0.00101127	0.00862804	Up
Arhgap29	11328.5	0.315563	0.13781	2.28984	0.0220305	0.0830386	Up	Arhgdib	309.07	2.32701	0.686452	3.38991	0.000699153	0.00471829	Up	Atp13a5	52.5601	7.60071	2.4391	3.11619	0.00183201	0.0142463	Up
Arhgap5	2137.27	1.11983	0.295345	3.79162	0.00014967	0.00117986	Up	Arhgdig	29.7293	8.13839	2.35146	3.461	0.000538172	0.00378641	Up	Atp1a2	1179.23	4.54782	0.786417	5.78296	7.33958e-09	2.23059e-07	Up
Arhgdig	26.768	7.84228	2.73523	2.86713	0.00414208	0.020994	Up	Arhgef18	961.824	0.658403	0.278804	2.36153	0.0181998	0.0714429	Up	Atp1a3	2717.9	9.76604	2.79437	3.4949	0.00047424	0.00454137	Up
Arhgef12	16583.6	0.596022	0.126889	4.69719	2.63768e-06	3.06719e-05	Up	Arhgef33	544.161	7.60022	2.74947	2.76425	0.00570536	0.0280326	Up	Atp1b2	925.868	3.46311	1.00763	3.4369	0.000588416	0.00546627	Up
Arhgef2	3911.49	1.05318	0.223253	4.71741	2.38861e-06	2.799e-05	Up	Arhgef37	31.0168	8.19957	2.31959	3.53492	0.000407896	0.0029746	Up	Atp2a2	8377.85	1.1997	0.487075	2.46308	0.013775	0.0734149	Up
Arhgef33	489.86	12.0364	3.29109	3.65726	0.000254926	0.00188524	Up	Arhgef5	3791.8	1.3621	0.16006	8.50996	1.73996e-17	6.8617e-16	Up	Atp2b2	3703.69	7.00582	2.02057	3.46726	0.000525795	0.00496327	Up
Arhgef37	27.9241	7.90329	2.69462	2.93299	0.0033571	0.0175126	Up	Arhgef9	681.551	1.55265	0.532825	2.91399	0.00356838	0.0189548	Up	Atp2b3	75.6895	9.56355	2.37657	4.0241	5.71946e-05	0.000715922	Up
Arhgef5	3880.07	0.772805	0.176063	4.38938	1.13675e-05	0.000115309	Up	Arid3a	429.032	1.16187	0.530409	2.19051	0.0284871	0.10156	Up	Atp6ap1l	108.421	22.8008	3.32325	6.86099	6.83838e-12	3.25378e-10	Up
Arhgef9	581.384	1.88809	0.771876	2.4461	0.0144411	0.059228	Up	Arl2	337.774	1.08153	0.510989	2.11654	0.0342992	0.116812	Up	Atp6v0a1	2022.88	1.20425	0.439684	2.73891	0.00616434	0.0385772	Up
Arid3a	356.67	1.54332	0.538704	2.86487	0.00417179	0.0211093	Up	Arl2bp	4251.27	0.512113	0.206824	2.47608	0.0132835	0.0555012	Up	Atp6v0c	373.865	24.5228	4.78487	5.12508	2.97409e-07	6.70867e-06	Up
Arl2bp	2643.16	2.46774	0.273136	9.03482	1.64271e-19	7.74166e-18	Up	Arl4a	2109.44	3.41532	0.20186	16.9192	3.2487e-64	5.7431e-62	Up	Atp6v0d1	868.006	1.81755	0.537043	3.38436	0.000713431	0.00641246	Up
Arl4a	2364.53	1.44291	0.283115	5.09656	3.45883e-07	4.81098e-06	Up	Arl5a	3130.11	0.755544	0.180336	4.18965	2.79381e-05	0.000279745	Up	Atp6v0e2	497.414	4.11964	0.804987	5.11765	3.09364e-07	6.94175e-06	Up
Arl5a	2526.04	1.20381	0.25752	4.67463	2.94486e-06	3.38547e-05	Up	Arl5c	38.4783	5.11122	1.74361	2.9314	0.00337439	0.0180956	Up	Atp6v1b2	2196.53	0.740319	0.284931	2.59824	0.00937035	0.0540019	Up
Arl6	221.71	2.05962	0.687721	2.99486	0.00274575	0.0147441	Up	Arl6	271.035	1.47684	0.520804	2.83568	0.00457275	0.0232954	Up	Atp6v1d	1389.72	0.804371	0.3131	2.56905	0.0101977	0.0576354	Up
Arl6ip1	5100.73	0.452446	0.15955	2.83576	0.00457167	0.0227758	Up	Arl6ip1	5513.92	0.561406	0.132064	4.25102	2.12799e-05	0.000217465	Up	Atrnl1	1720.57	1.11023	0.409112	2.71375	0.00665264	0.0409265	Up
Arl6ip5	2314.17	1.02902	0.232292	4.42983	9.43059e-06	9.74195e-05	Up	Arl6ip5	2428.52	1.31337	0.249008	5.2744	1.33192e-07	2.09886e-06	Up	Atxn7l3b	3633.56	0.437998	0.211539	2.07053	0.0384026	0.158894	Up
Armcx2	2759.93	0.779144	0.293831	2.65167	0.00800937	0.0365041	Up	Arl8b	2722.78	0.467541	0.217333	2.15127	0.031455	0.109626	Up	Auts2	2447.91	2.4783	0.544243	4.55366	5.27215e-06	8.60382e-05	Up
Arnt2	61.5789	5.06971	1.93743	2.61671	0.00887805	0.0397652	Up	Armc10	1247.83	0.874192	0.272779	3.20477	0.00135172	0.00836259	Up	Axin2	856.836	1.65964	0.409388	4.05395	5.03591e-05	0.000640574	Up
Arpc1a	1315.36	0.593721	0.284157	2.08941	0.0366709	0.123334	Up	Arntl	309.185	1.18519	0.503631	2.35329	0.018608	0.0727264	Up	B230120H23Rik	2452.79	0.998762	0.27904	3.57928	0.000344542	0.00347188	Up
Arpp21	47.9952	8.68477	2.26392	3.83617	0.000124968	0.00100764	Up	Arpc1b	3675.3	0.548534	0.197531	2.77695	0.00548716	0.0270923	Up	B230219D22Rik	4404.59	0.588011	0.227711	2.58227	0.00981524	0.0559726	Up
Arsb	497.301	2.15149	0.545882	3.9413	8.10417e-05	0.000683606	Up	Arpp21	54.1411	6.02152	1.59383	3.77801	0.000158085	0.00130227	Up	B3gat1	123.934	10.2751	2.5638	4.00775	6.12989e-05	0.000763779	Up
Arvcf	236.054	1.30285	0.632314	2.06044	0.0393565	0.130173	Up	Arsb	597.415	1.62611	0.449209	3.61994	0.000294667	0.00224467	Up	B4galnt4	25.2083	7.97717	3.33223	2.39394	0.0166683	0.0851076	Up
Arx	14.4803	6.95642	3.35737	2.07199	0.0382667	0.127234	Up	Arx	16.172	7.26085	2.81789	2.5767	0.00997496	0.0441736	Up	BC013529	1905.11	0.808011	0.327543	2.46689	0.0136293	0.0728142	Up
Arxes1	138.994	10.2189	1.78701	5.71842	1.07517e-08	1.89862e-07	Up	Arxes1	167.081	3.62571	1.12994	3.20877	0.00133302	0.00825691	Up	BC018242	81.348	6.67664	2.1947	3.04217	0.00234882	0.0174881	Up
Arxes2	265.529	11.1531	1.61045	6.92549	4.34471e-12	1.13478e-10	Up	Arxes2	315.349	3.96664	0.519621	7.63371	2.28098e-14	7.43253e-13	Up	BC024659	962.254	2.14382	0.879615	2.43723	0.0148003	0.0775731	Up
Asap3	423.645	4.80288	0.543032	8.84455	9.18969e-19	4.20041e-17	Up	Asap3	488.602	3.78833	0.61602	6.14969	7.76367e-10	1.66767e-08	Up	BC028528	741.338	1.03532	0.45214	2.28982	0.022032	0.105623	Up
Ascl1	22.2934	7.57827	2.9381	2.57931	0.00989985	0.0434443	Up	Asb4	472.567	4.32895	0.582964	7.42576	1.12135e-13	3.4771e-12	Up	BC030307	24.2915	6.43691	2.74877	2.34174	0.019194	0.0948242	Up
Asl	347.533	1.87599	0.577674	3.24749	0.0011643	0.00710423	Up	Asl	459.344	0.976166	0.38323	2.54721	0.0108588	0.047231	Up	BC039771	32.799	6.91741	2.50975	2.75622	0.00584739	0.0369582	Up
Asns	243.759	2.63732	0.636158	4.1457	3.38775e-05	0.000310629	Up	Asna1	1170.19	0.557508	0.269216	2.07086	0.0383723	0.127576	Up	BC048644	21.3537	7.73893	3.68861	2.09806	0.0358995	0.152089	Up
Asphd2	22.2636	7.57736	2.93626	2.58061	0.0098625	0.0432984	Up	Asns	323.554	1.39162	0.451987	3.07889	0.00207776	0.0120498	Up	BC057022	59.9427	9.22699	2.6331	3.50423	0.000457922	0.00440728	Up
Asrgl1	404.768	1.3526	0.534284	2.53162	0.0113538	0.0487809	Up	Asph	813.015	2.70876	0.659289	4.10861	3.98043e-05	0.000380243	Up	BC057079	564.779	1.86232	0.654658	2.84472	0.00444504	0.0297626	Up
Astn2	293.657	6.29772	1.24407	5.06221	4.14423e-07	5.67587e-06	Up	Asphd2	24.9474	7.8867	2.51396	3.13716	0.00170591	0.0101852	Up	BC065397	28.3231	6.70417	2.60417	2.5744	0.0100415	0.056943	Up
Atcay	90.7064	8.11373	2.03396	3.98913	6.63163e-05	0.000567597	Up	Aspscr1	529.553	0.803751	0.367993	2.18415	0.0289513	0.102858	Up	Baalc	66.168	4.46618	2.03101	2.19899	0.0278783	0.126407	Up
Ate1	1815.61	1.04341	0.294483	3.54318	0.000395327	0.00276838	Up	Asrgl1	495.654	0.917254	0.374842	2.44704	0.0144034	0.0591676	Up	Bace1	953.761	0.997089	0.448941	2.22098	0.0263522	0.12133	Up
Atg12	1579.31	0.615027	0.25063	2.45392	0.0141307	0.05827	Up	Astn1	675.415	7.0758	2.75786	2.56569	0.0102972	0.0452783	Up	Bag2	222.899	1.6375	0.737787	2.21948	0.026454	0.121615	Up
Atl2	2225.53	1.71631	0.277388	6.18741	6.1161e-10	1.2784e-08	Up	Astn2	350.456	3.42525	1.01593	3.37153	0.000747517	0.00499583	Up	Bai1	94.819	6.80017	1.96065	3.46833	0.000523704	0.00495111	Up
Atp10a	322.112	6.34992	1.22413	5.18732	2.13346e-07	3.07165e-06	Up	Ate1	1922.47	1.28927	0.241618	5.336	9.50169e-08	1.54152e-06	Up	Bai2	135.133	5.5428	2.00899	2.759	0.00579793	0.0367371	Up
Atp11b	3889.1	1.83165	0.190057	9.63737	5.55946e-22	3.00231e-20	Up	Atf6	1326.1	0.740157	0.265508	2.78771	0.00530828	0.0263343	Up	Bai3	328.449	11.6812	1.83614	6.36185	1.99332e-10	7.80214e-09	Up
Atp11c	2192.56	0.615233	0.247127	2.48955	0.0127906	0.0536623	Up	Atg10	169.23	2.34114	0.827225	2.83011	0.0046532	0.023627	Up	Baiap2	1239.96	1.53794	0.365917	4.20296	2.63442e-05	0.000361041	Up
Atp13a2	432.297	2.57611	0.560257	4.59808	4.26398e-06	4.7648e-05	Up	Atg12	1615.71	0.951703	0.212911	4.46997	7.82323e-06	8.87326e-05	Up	Bambi	1793.68	0.712713	0.334968	2.1277	0.0333616	0.144226	Up
Atp13a3	2222.4	0.701444	0.298533	2.34964	0.0187916	0.0733066	Up	Atg9a	664.077	1.18801	0.445055	2.66936	0.00759952	0.0353327	Up	Basp1	532.897	2.53523	1.13766	2.22846	0.0258501	0.119706	Up
Atp13a4	41.2282	8.46522	2.54863	3.32148	0.000895422	0.00568299	Up	Atl2	2386.58	1.96675	0.211182	9.31307	1.24188e-20	6.02526e-19	Up	Batf	20.8163	7.70125	3.38172	2.27732	0.0227673	0.108703	Up
Atp13a5	45.978	7.10856	2.32277	3.06038	0.00221059	0.0122519	Up	Atmin	733.284	0.796968	0.338672	2.35321	0.0186119	0.0727264	Up	Bcan	314.922	11.6206	1.90357	6.10462	1.03048e-09	3.54179e-08	Up
Atp1a1	7413.12	0.461387	0.178722	2.58159	0.00983462	0.043208	Up	Atox1	331.072	1.06347	0.434328	2.44855	0.0143432	0.0589803	Up	Bcap29	544.533	1.05484	0.528136	1.99729	0.0457942	0.181201	Up
Atp1a2	1232.87	1.99503	0.938821	2.12503	0.0335838	0.114964	Up	Atp10a	463.122	1.72414	0.450559	3.82666	0.000129896	0.0010917	Up	Bcas1	62.5233	9.28816	2.30154	4.03564	5.44547e-05	0.000685796	Up
Atp1a3	2377.25	8.2082	3.05632	2.68565	0.0072389	0.0334603	Up	Atp11b	4249.5	1.97368	0.178285	11.0703	1.74767e-28	1.21078e-26	Up	Bcdin3d	49.5376	3.40128	1.52046	2.23701	0.0252858	0.117845	Up
Atp1b1	3484.04	7.12077	1.37129	5.19276	2.07197e-07	2.9888e-06	Up	Atp11c	2500.64	0.538037	0.212116	2.53652	0.011196	0.0483015	Up	Bche	586.824	5.04461	0.593835	8.49497	1.97986e-17	1.5866e-15	Up
Atp1b2	795.64	3.73721	0.893148	4.18431	2.86028e-05	0.000266778	Up	Atp13a5	50.4579	8.90139	2.27577	3.91137	9.17734e-05	0.000804496	Up	Bcl2	1771.99	0.61418	0.279324	2.19881	0.0278918	0.126411	Up
Atp2b2	3228.37	7.31242	1.9533	3.74362	0.000181387	0.00139794	Up	Atp1a2	1322.6	2.24071	0.638733	3.50805	0.000451411	0.00323773	Up	Bcr	1372.07	1.67239	0.542964	3.08012	0.00206917	0.0157322	Up
Atp2b3	66.3445	7.65513	2.10949	3.6289	0.000284637	0.00207662	Up	Atp1a3	2618.84	11.5427	1.92594	5.99329	2.05639e-09	4.23959e-08	Up	Begain	20.8865	7.7058	3.55594	2.16702	0.0302331	0.133854	Up
Atp5a1	10778.6	0.619058	0.196975	3.14282	0.00167328	0.00969162	Up	Atp1b1	3875	6.28209	1.33676	4.6995	2.608e-06	3.3232e-05	Up	Bend5	327.993	1.89032	0.698114	2.70776	0.00677392	0.0415718	Up
Atp5b	11326.2	0.42739	0.150659	2.8368	0.00455678	0.022724	Up	Atp1b2	874.952	3.87545	0.790706	4.90125	9.52294e-07	1.31475e-05	Up	Bend6	83.2615	8.2652	2.17962	3.79203	0.000149418	0.00166547	Up
Atp5c1	3879.5	0.91555	0.20481	4.47024	7.81325e-06	8.22233e-05	Up	Atp2b2	3554.11	8.35961	2.29908	3.63608	0.000276822	0.00212346	Up	Best1	84.0318	9.71486	2.10625	4.6124	3.98043e-06	6.75653e-05	Up
Atp5f1	2828.02	0.584838	0.200456	2.91753	0.00352813	0.0183019	Up	Atp2b3	73.0457	9.4352	2.05769	4.58534	4.53256e-06	5.39886e-05	Up	Beta-s	5446.57	2.95582	1.49618	1.97558	0.0482029	0.187999	Up
Atp6ap1l	94.6741	22.4163	3.20929	6.98481	2.85247e-12	7.60743e-11	Up	Atp5c1	4877.81	0.459961	0.19053	2.41411	0.0157736	0.0637911	Up	Bfar	1059.83	0.963758	0.398339	2.41944	0.0155443	0.0805187	Up
Atp6v0c	326.462	24.1415	4.78486	5.04538	4.52623e-07	6.1436e-06	Up	Atp5f1	3064.28	0.691849	0.19794	3.49525	0.00047362	0.00338646	Up	Bgn	9573.97	1.06867	0.304876	3.50526	0.000456167	0.00439873	Up
Atp6v0e2	522.434	1.84357	0.557286	3.30812	0.000939235	0.00591898	Up	Atp5h	2870.67	0.813158	0.306712	2.6512	0.00802052	0.0370101	Up	Bhlhb9	957.22	0.884033	0.427294	2.06891	0.0385546	0.159417	Up
Atp8a2	64.8972	9.11983	2.46566	3.69874	0.000216676	0.00163341	Up	Atp6ap1	2190.26	0.384356	0.195372	1.96731	0.0491478	0.153574	Up	Birc3	543.021	1.12161	0.549042	2.04285	0.0410677	0.166884	Up
Atrn	2539.04	0.796655	0.324204	2.45726	0.014	0.0578408	Up	Atp6ap1l	104.513	22.6783	4.78518	4.73929	2.14473e-06	2.77426e-05	Up	Bmp2k	1939.85	1.39521	0.600385	2.32385	0.0201334	0.0982348	Up
Atxn1	1536.5	0.679692	0.294586	2.30728	0.0210393	0.0798976	Up	Atp6v0a1	2059.29	0.975831	0.246548	3.95797	7.55892e-05	0.000673949	Up	Bmp6	45.3376	4.35617	1.83804	2.37001	0.0177878	0.0892966	Up
Auts2	2079.18	2.6883	0.391257	6.87094	6.37824e-12	1.64329e-10	Up	Atp6v0b	1027.74	0.922636	0.255768	3.60732	0.00030938	0.00234167	Up	Bmpr2	7506.76	1.11624	0.16307	6.84516	7.63888e-12	3.57876e-10	Up
Axin2	674.485	2.36943	0.455959	5.19659	2.02976e-07	2.93629e-06	Up	Atp6v0d1	968.298	1.06074	0.339705	3.12252	0.0017931	0.0106028	Up	Bnip3l	6542.8	0.504777	0.215973	2.33723	0.0194273	0.0955737	Up
B230120H23Rik	1955.48	1.40426	0.241497	5.81482	6.06992e-09	1.10977e-07	Up	Atp6v0e2	639.334	1.30453	0.367646	3.54833	0.000387682	0.00284881	Up	Bpgm	1829.57	1.44816	0.328988	4.40185	1.07332e-05	0.000163424	Up
B230219D22Rik	3607.21	0.805382	0.212119	3.79683	0.000146557	0.00115954	Up	Atp6v1b2	2226.07	0.567458	0.218555	2.59641	0.00942037	0.0421546	Up	Brap	1235.08	0.787499	0.335077	2.3502	0.0187631	0.0932095	Up
B3galnt1	66.7961	9.16142	2.31146	3.96348	7.38651e-05	0.000626202	Up	Atp6v1d	1350.32	0.788154	0.229204	3.43865	0.000584622	0.00405936	Up	Brsk1	158.523	7.63648	1.68546	4.53081	5.87576e-06	9.47715e-05	Up
B3galt5	47.8478	5.02918	2.08071	2.41705	0.0156467	0.0630371	Up	Atp6v1e1	1489.04	0.81779	0.269401	3.03558	0.00240072	0.0136398	Up	Bsg	33515	4.69444	0.227672	20.6193	1.84129e-94	1.33502e-91	Up
B3gat1	108.204	9.85753	2.48739	3.963	7.40141e-05	0.000627116	Up	Atp6v1f	635.18	0.791972	0.339812	2.33062	0.0197733	0.0762572	Up	Bsn	229.52	1.77208	0.849972	2.08487	0.0370809	0.155432	Up
B4galnt4	21.9858	7.55802	3.11221	2.42851	0.0151611	0.0614925	Up	Atp6v1g2	190.904	1.62929	0.790954	2.05991	0.0394073	0.130033	Up	Btbd11	268.82	6.1805	1.35664	4.55576	5.21974e-06	8.54578e-05	Up
B630019K06Rik	77.2753	9.37234	1.96619	4.76675	1.87222e-06	2.24948e-05	Up	Atp8a1	1732	0.69649	0.212798	3.273	0.00106412	0.00679375	Up	Bzrap1	73.5111	8.08523	2.22061	3.641	0.00027158	0.00281681	Up
BC013529	1714.92	0.664913	0.307572	2.16181	0.0306326	0.106666	Up	Atp8a2	71.7201	9.40883	2.25544	4.17162	3.02444e-05	0.000301269	Up	Bzw2	646.773	1.38642	0.531804	2.60701	0.00913361	0.0528708	Up
BC024659	929.167	1.45671	0.357783	4.07149	4.67142e-05	0.000414355	Up	Atxn1	1391.54	1.65211	0.248455	6.64953	2.94024e-11	7.43765e-10	Up	C030039L03Rik	31.1596	8.28333	2.91114	2.84539	0.00443565	0.0297253	Up
BC028528	581.417	1.53328	0.420018	3.65052	0.00026171	0.00192695	Up	Atxn7l3b	3584.22	0.373591	0.153662	2.43125	0.015047	0.0613203	Up	C130074G19Rik	13876.9	1.42273	0.17747	8.01672	1.08604e-15	7.62028e-14	Up
BC031181	1010.79	1.04309	0.41474	2.51505	0.0119016	0.050661	Up	Auh	297.36	0.98633	0.479925	2.05518	0.0398621	0.131242	Up	C1ql1	24.9583	7.96336	3.13473	2.54037	0.0110736	0.0617381	Up
BC057022	53.1176	5.92485	2.09857	2.82328	0.00475353	0.0235504	Up	Auts2	2503.61	2.02475	0.227238	8.91026	5.09134e-19	2.21827e-17	Up	C1qtnf5	24.6341	7.94471	3.16223	2.51237	0.0119922	0.0657992	Up
BC057079	466.721	2.22117	0.791184	2.8074	0.00499425	0.0245427	Up	Avl9	1008.25	0.744086	0.282664	2.63241	0.00847819	0.0388195	Up	C4b	27.8896	8.12339	3.02383	2.68646	0.00722135	0.0437883	Up
BC065397	25.0043	5.26176	1.9982	2.63325	0.00845724	0.0381733	Up	Axin2	934.314	1.04945	0.314066	3.34151	0.000833231	0.00548591	Up	C530008M17Rik	1180.44	4.56993	0.402976	11.3405	8.27114e-30	1.23467e-27	Up
Bag2	167.379	2.8079	0.922326	3.04436	0.00233172	0.0128271	Up	B230219D22Rik	4470.51	0.423688	0.186737	2.26891	0.023274	0.0867557	Up	C630004H02Rik	834.331	1.96916	0.399114	4.93382	8.0637e-07	1.62405e-05	Up
Bai1	81.9491	9.45643	2.23398	4.233	2.30596e-05	0.000218706	Up	B230312A22Rik	713.928	0.70541	0.358166	1.96951	0.0488947	0.152939	Up	C920021L13Rik	123.543	3.12426	1.37918	2.26531	0.0234937	0.111577	Up
Bai2	115.444	9.95092	2.24757	4.42742	9.53675e-06	9.82486e-05	Up	B3galt5	53.8604	4.38091	1.87462	2.33695	0.0194416	0.075154	Up	Cab39	3994.33	0.466175	0.223964	2.08147	0.0373908	0.156276	Up
Bai3	286.644	9.79952	1.7347	5.64913	1.61263e-08	2.76204e-07	Up	B3gat1	119.479	10.1456	4.03377	2.51516	0.011898	0.0508543	Up	Cachd1	1273.9	1.59381	0.3577	4.45572	8.36118e-06	0.000129773	Up
Baiap2	1056.39	1.64477	0.416083	3.95299	7.71802e-05	0.000652121	Up	B3gnt1	424.338	1.53778	0.438199	3.50932	0.000449261	0.00322579	Up	Cacna1a	1377.94	2.64966	0.626582	4.22876	2.34987e-05	0.000324381	Up
Bambi	1073.46	3.16954	0.388966	8.14863	3.68076e-16	1.38944e-14	Up	B3gnt2	1016.32	1.35239	0.333439	4.05588	4.99449e-05	0.00046753	Up	Cacna1b	70.0819	9.45247	2.52448	3.74432	0.000180884	0.00197147	Up
Basp1	437.524	3.24486	1.10054	2.94842	0.00319402	0.0167656	Up	B4galt6	368.152	1.44378	0.705806	2.04557	0.0407986	0.13345	Up	Cacna1d	42.7485	5.73609	2.17031	2.64299	0.00821785	0.0488388	Up
Bbs12	26.5386	7.83076	2.77049	2.82649	0.00470613	0.0233919	Up	B630019K06Rik	116.251	1.52677	0.766265	1.99248	0.0463184	0.147064	Up	Cacna1e	1287.32	12.2113	1.48317	8.23324	1.8222e-16	1.36004e-14	Up
Bcan	274.62	11.2013	1.86599	6.00286	1.93873e-09	3.78639e-08	Up	B930041F14Rik	81.8676	1.83516	0.885641	2.07212	0.0382539	0.127292	Up	Cacna1g	911.546	7.00565	2.17614	3.2193	0.00128506	0.0105365	Up
Bcas1	54.3188	8.86349	2.15824	4.10681	4.01157e-05	0.000361923	Up	B9d2	67.1958	2.25532	0.937552	2.40555	0.0161484	0.0650502	Up	Cacna1h	41.214	8.68669	2.67663	3.24538	0.00117292	0.00976966	Up
Bcat1	75.3002	9.33438	2.11208	4.41952	9.89186e-06	0.0001017	Up	BC013529	1939.07	0.618812	0.261214	2.36899	0.0178369	0.0703594	Up	Cacna2d1	136.863	5.58007	1.33568	4.1777	2.94476e-05	0.00039855	Up
Bche	525.386	4.03312	0.864439	4.66559	3.07729e-06	3.52437e-05	Up	BC022687	50.0215	2.41072	1.18463	2.035	0.0418511	0.136043	Up	Cacna2d2	788.492	4.21471	1.21147	3.479	0.000503286	0.00478342	Up
Bcl11a	154.457	5.00104	1.10067	4.54364	5.52914e-06	6.01036e-05	Up	BC024659	1071.62	1.28248	0.301893	4.24813	2.15566e-05	0.000219709	Up	Cacna2d3	64.9324	9.34236	2.53814	3.6808	0.000232507	0.00245333	Up
Bcl2	1417.96	0.931067	0.318784	2.92068	0.0034927	0.0181451	Up	BC031181	1106.33	1.11643	0.325551	3.42936	0.000605017	0.00417459	Up	Cacnb1	34.3956	8.4257	4.26577	1.97519	0.0482465	0.18807	Up
Bcr	1456.1	0.721948	0.286376	2.52098	0.0117029	0.0500397	Up	BC048644	20.7437	7.6207	3.03018	2.51493	0.0119055	0.0508543	Up	Cacnb4	251.178	4.73523	1.89423	2.49981	0.0124258	0.0676182	Up
Bdh1	145.472	8.80975	1.86144	4.73277	2.21475e-06	2.61955e-05	Up	BC057079	590.186	1.41322	0.387966	3.64265	0.000269847	0.00207616	Up	Cacng2	353.262	9.34166	1.59881	5.8429	5.12995e-09	1.59081e-07	Up
Begain	18.218	7.28677	3.3126	2.19971	0.0278274	0.099407	Up	BC068157	66.8999	2.94438	1.15032	2.55961	0.0104791	0.0459168	Up	Cacng5	44.1161	8.78483	4.00477	2.19359	0.0282648	0.127552	Up
Bend5	250.396	3.07532	0.716929	4.28958	1.79014e-05	0.000174026	Up	Baalc	77.7323	1.8865	0.95314	1.97925	0.0477877	0.150484	Up	Cadm1	1821.24	4.38749	0.728184	6.02525	1.6885e-09	5.5768e-08	Up
Bex2	153.39	10.3609	1.89119	5.47851	4.28917e-08	6.88035e-07	Up	Bace1	990.839	0.710457	0.273472	2.59791	0.00937922	0.0420071	Up	Cadm2	322.634	5.80935	1.44368	4.02398	5.7223e-05	0.000715922	Up
Bhlhb9	597.068	3.20647	0.441972	7.25491	4.01917e-13	1.15513e-11	Up	Bai1	90.6526	9.74682	2.05524	4.74243	2.11167e-06	2.7338e-05	Up	Cadm3	244.79	8.84015	1.60179	5.51893	3.41074e-08	9.24057e-07	Up
Bin1	895.027	1.2517	0.394643	3.17172	0.00151538	0.00891314	Up	Bai2	136.405	3.85593	1.47955	2.60615	0.00915662	0.0412142	Up	Cadm4	141.084	4.36874	1.66897	2.61762	0.00885447	0.0515951	Up
Blvra	499.663	1.11456	0.536992	2.07556	0.0379344	0.12649	Up	Bai3	320.428	6.53867	2.47775	2.63895	0.00831634	0.038152	Up	Cadps	411.366	12.0061	3.67516	3.26682	0.00108762	0.0091442	Up
Bmf	677.048	2.18421	0.439869	4.9656	6.84906e-07	8.92907e-06	Up	Baiap2	1377.03	0.883797	0.244404	3.61613	0.000299038	0.00227233	Up	Calb1	3000.2	3.91319	1.86918	2.09354	0.0363014	0.153237	Up
Bmp1	667.872	3.2601	0.564807	5.77206	7.83092e-09	1.41301e-07	Up	Bambi	1411.5	1.69709	0.292786	5.79633	6.77826e-09	1.29664e-07	Up	Calm3	9106.87	0.473254	0.219355	2.15748	0.0309684	0.136214	Up
Bmp15	29.8271	7.99879	2.59069	3.08751	0.00201843	0.0113401	Up	Barhl1	30.4846	5.0158	2.08792	2.40229	0.0162926	0.0654769	Up	Caln1	111.735	10.1255	2.35003	4.30868	1.64231e-05	0.000237022	Up
Bmp7	16.6446	7.15646	3.37816	2.11845	0.034137	0.116531	Up	Basp1	471.719	3.73879	0.715501	5.22541	1.73765e-07	2.68864e-06	Up	Caly	40.801	8.67194	2.93809	2.95155	0.0031618	0.0224541	Up
Bmpr1a	134.121	4.86027	1.07044	4.54044	5.61379e-06	6.09365e-05	Up	Batf	20.3812	6.15438	2.35172	2.61697	0.00887151	0.0401305	Up	Camk2a	128.12	4.28579	1.30237	3.29076	0.000999172	0.00853693	Up
Bmpr1b	31.0409	8.05569	3.01589	2.67108	0.00756072	0.0346756	Up	Bcan	318.885	4.33172	1.03897	4.16926	3.05595e-05	0.000303621	Up	Camk2b	556.146	11.007	1.961	5.61296	1.98899e-08	5.62428e-07	Up
Boc	147.121	4.52296	1.12752	4.01142	6.03546e-05	0.000519796	Up	Bcap29	536.008	0.978997	0.372513	2.62809	0.00858664	0.0392109	Up	Camsap2	4843.95	0.619682	0.221668	2.79554	0.00518134	0.033585	Up
Bok	586.652	0.900143	0.432207	2.08267	0.0372816	0.124862	Up	Bcas1	60.476	9.16323	1.91048	4.79629	1.61633e-06	2.15594e-05	Up	Camta1	428.651	2.50634	1.16235	2.15626	0.0310635	0.136514	Up
Brd7	2069.64	0.97383	0.260149	3.74335	0.000181583	0.00139874	Up	Bcat1	83.7485	8.19956	1.84648	4.44065	8.96876e-06	0.000100174	Up	Car10	69.877	9.44828	2.38648	3.95909	7.5236e-05	0.000911331	Up
Bri3bp	219.734	4.14194	1.33016	3.11386	0.00184658	0.0105227	Up	Bche	589.204	3.83579	0.546152	7.0233	2.16683e-12	6.09248e-11	Up	Car11	28.6929	8.16396	3.41448	2.39098	0.0168033	0.0856823	Up
Brsk1	137.532	10.2035	2.00247	5.09544	3.47933e-07	4.83505e-06	Up	Bcl11a	184.784	3.14154	0.896547	3.50405	0.000458244	0.00328262	Up	Car14	163.971	9.24291	1.94184	4.75987	1.93713e-06	3.55788e-05	Up
Brwd3	1252.45	1.05406	0.31684	3.32679	0.000878525	0.00558509	Up	Bcl2	1494.86	1.18036	0.23476	5.02793	4.95803e-07	7.17353e-06	Up	Car2	1579.33	1.30963	0.666175	1.96589	0.0493108	0.190895	Up
Bscl2	551.474	1.04705	0.420747	2.48854	0.0128268	0.05377	Up	Bcl2l13	1480.17	0.490499	0.242297	2.02437	0.042932	0.138775	Up	Car4	5134.26	8.42858	0.32266	26.1222	2.04222e-150	2.59123e-147	Up
Bsg	29253.9	4.47055	0.158167	28.2648	9.3764e-176	7.48878e-173	Up	Bcr	1558.64	0.884983	0.218743	4.04577	5.21515e-05	0.000485527	Up	Car8	1934.76	3.53138	1.7271	2.04469	0.0408858	0.166407	Up
Bsn	168.12	3.49495	0.896653	3.89777	9.70828e-05	0.000801977	Up	Bdh1	168.466	4.37406	1.60856	2.71923	0.00654332	0.0314292	Up	Casc4	1267.24	1.23172	0.329851	3.73417	0.000188334	0.00203519	Up
Bspry	62.2254	2.49548	1.17867	2.1172	0.0342429	0.116772	Up	Bend5	380.392	0.942511	0.461292	2.0432	0.0410329	0.134102	Up	Casp6	1305.04	2.31821	0.455876	5.08518	3.67281e-07	8.08124e-06	Up
Btbd1	1483.25	0.938865	0.269827	3.47951	0.000502328	0.00342753	Up	Bend6	80.0994	9.56821	2.0347	4.70251	2.56979e-06	3.28212e-05	Up	Casp8	2397.56	0.627875	0.25315	2.48025	0.013129	0.0707621	Up
Btbd11	230.234	10.9472	1.62805	6.72411	1.76664e-11	4.35914e-10	Up	Best1	99.4205	2.16501	0.95455	2.26809	0.0233237	0.0868779	Up	Cat	3197.2	1.36603	0.25899	5.27447	1.3314e-07	3.23771e-06	Up
Btbd3	1663.38	0.612089	0.297032	2.06068	0.0393331	0.130139	Up	Bex2	214.723	1.92501	0.862498	2.2319	0.0256217	0.0934459	Up	Cav1	6658.36	0.839979	0.354517	2.36936	0.0178189	0.0894236	Up
Btbd6	141.202	2.05022	0.853039	2.40343	0.0162421	0.064947	Up	Bfar	1111.06	0.649364	0.304945	2.12945	0.0332172	0.114138	Up	Cbln2	153.689	10.5857	1.83639	5.76441	8.19421e-09	2.48042e-07	Up
Bzrap1	64.9538	5.80075	1.86991	3.10216	0.00192113	0.0108618	Up	Bgn	9754.09	0.854785	0.252647	3.38332	0.000716146	0.00480975	Up	Cbs	38.4828	8.58759	2.85072	3.01243	0.00259164	0.0189622	Up
Bzw2	542.567	1.57206	0.409208	3.84171	0.000122183	0.00098781	Up	Bhlhb9	716.23	2.38027	0.350851	6.78427	1.16673e-11	3.06217e-10	Up	Ccbl1	22.3524	6.31441	2.8116	2.24584	0.0247142	0.115985	Up
C130074G19Rik	9977.24	2.86856	0.218039	13.1561	1.56882e-39	1.57661e-37	Up	Bhlhe40	1851.42	0.768297	0.308496	2.49046	0.0127578	0.0538164	Up	Ccdc141	6149.99	6.33299	0.341695	18.5341	1.09689e-76	6.18565e-74	Up
C1ql1	21.6665	7.53761	2.89409	2.60449	0.00920115	0.0409825	Up	Bin1	1175.86	0.575507	0.284754	2.02106	0.0432732	0.139527	Up	Ccdc152	32.3655	8.33837	2.85487	2.92075	0.00349191	0.0243554	Up
C530008M17Rik	998.842	5.97645	0.387287	15.4316	1.00421e-53	1.4795e-51	Up	Bin3	490.828	1.03431	0.415224	2.49097	0.0127397	0.0537695	Up	Ccdc40	21.1304	6.27782	2.87527	2.18338	0.0290076	0.129903	Up
C77080	315.531	1.97855	0.6163	3.21036	0.00132568	0.00794202	Up	Birc3	513.215	1.23834	0.451079	2.7453	0.00604564	0.0294863	Up	Ccdc47	5638.81	0.843072	0.225359	3.74102	0.000183276	0.00199042	Up
C77370	464.062	9.49886	1.1489	8.26776	1.36505e-16	5.31143e-15	Up	Blcap	284.897	1.22711	0.592728	2.07028	0.0384266	0.127701	Up	Ccdc48	137.119	4.06976	1.0323	3.9424	8.06692e-05	0.000969431	Up
C85492	33.866	6.66542	2.29307	2.90677	0.0036518	0.0188362	Up	Bloc1s1	423.597	1.07304	0.420456	2.55209	0.0107078	0.0467573	Up	Ccdc65	19.4951	7.60694	3.43546	2.21424	0.0268122	0.122743	Up
Cab39	3398.35	0.536046	0.21912	2.44636	0.0144306	0.059217	Up	Blvrb	237.824	1.78472	0.57507	3.10349	0.00191254	0.0111971	Up	Ccdc74a	17.2124	7.42694	3.63219	2.04476	0.040879	0.166407	Up
Cabp1	97.7116	9.71055	1.87394	5.1819	2.19641e-07	3.1593e-06	Up	Bmp15	33.2521	8.30052	2.22126	3.73685	0.00018634	0.00150441	Up	Ccdc8	724.162	2.24916	0.728955	3.08545	0.00203244	0.0155507	Up
Cachd1	979.444	2.48361	0.564471	4.3999	1.08302e-05	0.000110301	Up	Bnip3l	5780.5	0.84835	0.185515	4.57295	4.80901e-06	5.6938e-05	Up	Ccdc85a	2060.95	1.45216	0.274464	5.29088	1.21727e-07	2.97498e-06	Up
Cacna1b	61.8634	6.46304	2.07513	3.11452	0.00184245	0.0105194	Up	Bok	479.462	3.00057	0.533043	5.62913	1.8112e-08	3.25044e-07	Up	Ccdc90a	777.875	1.11685	0.451611	2.47303	0.0133973	0.0719429	Up
Cacna1c	66.4195	4.28638	1.88808	2.27023	0.0231936	0.086181	Up	Bpgm	1850.16	1.22804	0.262587	4.67671	2.91518e-06	3.6511e-05	Up	Ccdc91	380.849	2.84058	0.584254	4.86188	1.16275e-06	2.2467e-05	Up
Cacna1d	36.3864	8.2858	2.43922	3.3969	0.000681538	0.00447139	Up	Brd7	2367.15	0.869541	0.196299	4.42968	9.4371e-06	0.00010472	Up	Ccdc96	67.763	4.70572	1.48746	3.1636	0.00155832	0.0124225	Up
Cacna1e	1121.88	7.68032	2.36867	3.24246	0.00118501	0.00721897	Up	Bre	357.136	1.31565	0.511101	2.57415	0.0100487	0.0444491	Up	Cck	36.9776	8.52997	3.04242	2.80368	0.0050523	0.0328745	Up
Cacna1h	35.8631	8.26427	2.49721	3.3094	0.000934956	0.00589936	Up	Bri3bp	304.554	1.63836	0.722914	2.26632	0.0234315	0.0872583	Up	Ccl19	58.5555	9.19355	2.35202	3.90879	9.27592e-05	0.00109231	Up
Cacna2d2	653.097	12.4513	3.59324	3.4652	0.000529839	0.00358782	Up	Brox	1887.32	0.516212	0.204895	2.51939	0.0117558	0.0503213	Up	Ccl28	38.4464	5.16094	2.32693	2.21792	0.0265605	0.121994	Up
Cacna2d3	56.6308	8.92321	2.4156	3.694	0.000220754	0.00165839	Up	Brp44l	293.28	1.48977	0.601171	2.47811	0.0132079	0.0552453	Up	Ccni	6083.68	0.410989	0.186053	2.20899	0.0271755	0.123848	Up
Cacnb2	71.9516	9.2687	2.30574	4.01984	5.82368e-05	0.00050442	Up	Brsk1	152.84	8.00459	1.55446	5.14944	2.61267e-07	3.94336e-06	Up	Ccny	3089.65	0.605579	0.234899	2.57804	0.00993621	0.05643	Up
Cacng2	307.749	11.3656	1.93744	5.86632	4.45575e-09	8.31685e-08	Up	Brsk2	160.832	4.6708	1.20173	3.88674	0.000101599	0.000881325	Up	Cd2ap	6871.07	0.94241	0.212058	4.44412	8.82516e-06	0.00013628	Up
Cacng4	32.1213	8.10564	2.52852	3.20569	0.0013474	0.00803727	Up	Bscl2	638.034	0.889338	0.341091	2.60734	0.00912493	0.0411325	Up	Cd82	2892.17	3.83857	0.527346	7.27904	3.36195e-13	1.88889e-11	Up
Cacng5	38.5226	8.3675	3.8093	2.1966	0.0280493	0.0998826	Up	Bsg	32386.4	4.7728	0.139074	34.3185	4.16025e-258	7.99808e-255	Up	Cd83	160.257	4.2246	1.25218	3.3738	0.000741395	0.00662859	Up
Cad	660.653	1.06404	0.381905	2.78615	0.00533389	0.0259346	Up	Bsn	200.022	2.5958	0.879977	2.94985	0.0031793	0.01726	Up	Cdc23	1944.21	1.03258	0.29866	3.45738	0.000545458	0.005114	Up
Cadm1	1528.21	6.31505	1.66043	3.80326	0.000142805	0.00113459	Up	Btbd1	1849.79	0.509151	0.212453	2.39653	0.016551	0.0664284	Up	Cdc27	2456.02	0.890477	0.282485	3.15229	0.00161993	0.0128463	Up
Cadm2	297.431	3.72434	1.48334	2.51078	0.0120466	0.0511204	Up	Btbd11	256.936	9.8036	1.5239	6.43323	1.24921e-10	2.95129e-09	Up	Cdc42ep4	2197.75	1.02163	0.269952	3.78447	0.000154034	0.00171442	Up
Cadm4	123.374	4.2627	1.79718	2.37189	0.0176975	0.06981	Up	Bzrap1	71.0058	7.9242	1.96772	4.0271	5.64686e-05	0.000521928	Up	Cdh10	63.496	9.31023	2.35064	3.96071	7.47263e-05	0.000905878	Up
Cadps	359.093	11.5883	3.68091	3.14822	0.00164268	0.00953988	Up	C130074G19Rik	14770.1	0.970628	0.122433	7.92781	2.23049e-15	7.77891e-14	Up	Cdh11	1972.39	3.9807	0.881785	4.51437	6.35047e-06	0.000101527	Up
Calb1	2456.81	10.8351	1.96273	5.52041	3.38208e-08	5.52455e-07	Up	C1qtnf4	27.1494	8.00745	3.72018	2.15243	0.0313632	0.10943	Up	Cdh12	51.5386	9.00911	3.2341	2.78566	0.00534188	0.0344059	Up
Caln1	97.4975	9.70712	2.26777	4.28047	1.86495e-05	0.000180144	Up	C1qtnf6	582.795	1.58005	0.338995	4.66098	3.1471e-06	3.90579e-05	Up	Cdh18	86.836	9.76176	2.45254	3.98026	6.88395e-05	0.000844601	Up
Caly	35.5974	8.25331	2.77576	2.97335	0.00294571	0.0156352	Up	C630004H02Rik	1072.49	0.582862	0.24924	2.33856	0.0193583	0.0749141	Up	Cdh2	5691.27	6.15903	0.25167	24.4726	2.89163e-132	2.75175e-129	Up
Camk2a	108.062	5.90947	1.71581	3.44413	0.000572897	0.00383998	Up	C77080	307.139	3.36879	0.554484	6.07555	1.23566e-09	2.61769e-08	Up	Cdh8	37.5108	8.55066	2.90156	2.94692	0.00320958	0.0227298	Up
Camk2b	485.233	12.0227	3.63079	3.3113	0.000928627	0.00587163	Up	C77370	566.515	3.38216	0.411198	8.22512	1.94998e-16	7.35066e-15	Up	Cdk14	329.984	4.41666	0.9678	4.5636	5.02831e-06	8.2948e-05	Up
Camk2n1	593.684	1.22556	0.412728	2.96942	0.00298365	0.0158034	Up	C8g	17.2855	7.35619	2.76731	2.65825	0.00785472	0.0363653	Up	Cdk5r2	131.849	8.93039	2.20687	4.04664	5.19591e-05	0.00065763	Up
Camta1	416.758	1.67271	0.741903	2.25462	0.024157	0.0888767	Up	Cab39	3956.96	0.387718	0.164096	2.36275	0.0181398	0.0712984	Up	Cdkn2b	294.424	11.5239	1.6655	6.91916	4.54318e-12	2.23144e-10	Up
Cap1	5282.33	0.71584	0.158717	4.51017	6.47762e-06	6.94194e-05	Up	Cabp1	150.328	1.38815	0.671071	2.06856	0.0385874	0.128069	Up	Cdr1	101.965	9.99349	2.32644	4.29561	1.74212e-05	0.000248599	Up
Capg	366.219	1.67762	0.579285	2.89602	0.00377931	0.0194016	Up	Cabyr	23.024	6.33172	2.29978	2.75319	0.00590176	0.0288914	Up	Cds1	282.521	6.5506	1.43745	4.55711	5.18618e-06	8.49998e-05	Up
Caprin2	55.2209	7.39217	2.06128	3.58621	0.000335518	0.002396	Up	Cachd1	1186.06	1.83153	0.376716	4.86184	1.16299e-06	1.58994e-05	Up	Ceacam2	17.8657	7.48037	3.80203	1.96747	0.0491294	0.190439	Up
Car10	62.9024	4.94277	1.54021	3.20915	0.00133127	0.0079567	Up	Cacna1a	1162.55	6.27827	0.603056	10.4107	2.21482e-25	1.38471e-23	Up	Celf3	39.8935	8.63952	2.84574	3.03595	0.0023978	0.0177918	Up
Car2	1320.83	1.50497	0.366102	4.1108	3.94298e-05	0.000357435	Up	Cacna1b	76.3955	2.94675	1.49557	1.97031	0.0488026	0.152744	Up	Cend1	284.007	11.4715	2.08922	5.49081	4.00097e-08	1.07441e-06	Up
Car4	4444.49	10.3263	1.18646	8.70344	3.21965e-18	1.40802e-16	Up	Cacna1e	1250.24	8.29856	1.37403	6.03957	1.54525e-09	3.25562e-08	Up	Cep68	2085.63	0.710188	0.312815	2.27031	0.0231888	0.110473	Up
Car5a	80.9069	3.76143	1.7856	2.10653	0.0351581	0.119303	Up	Cacna1g	894.999	5.24693	1.90633	2.75237	0.00591652	0.028952	Up	Cep72	80.5826	9.65431	2.13189	4.52852	5.93974e-06	9.5601e-05	Up
Car7	44.952	8.59007	2.99745	2.86579	0.00415965	0.021055	Up	Cacna2d3	62.9072	7.78921	2.07141	3.76034	0.000169684	0.00138742	Up	Cep97	414.765	1.5448	0.690372	2.23764	0.0252449	0.117719	Up
Carm1	760.769	0.800912	0.401695	1.99383	0.0461705	0.14725	Up	Cacnb4	258.684	3.21179	1.19014	2.69866	0.00696186	0.0328547	Up	Cercam	34.3303	8.42288	2.91648	2.88803	0.00387662	0.026576	Up
Casc4	1213.34	0.805125	0.288565	2.7901	0.00526914	0.0256809	Up	Cacng2	340.811	9.16654	1.53235	5.98203	2.20368e-09	4.52505e-08	Up	Cerkl	35.9371	5.37408	2.31262	2.3238	0.020136	0.0982348	Up
Cask	1092.72	1.59231	0.347542	4.58165	4.61328e-06	5.1137e-05	Up	Cacng4	35.7922	8.40664	2.17552	3.86421	0.00011145	0.000957602	Up	Cfi	20.2373	7.66142	3.53619	2.16657	0.0302674	0.133854	Up
Caskin1	104.774	2.86361	1.15548	2.47829	0.0132013	0.054945	Up	Cacng5	42.526	8.65499	3.38677	2.55553	0.0106026	0.0463395	Up	Cgnl1	13391.6	1.48413	0.210248	7.05894	1.67783e-12	8.71898e-11	Up
Casp6	1322.35	1.3109	0.474314	2.76377	0.00571372	0.0274276	Up	Cadm1	2574.99	0.913598	0.195659	4.66934	3.02174e-06	3.77227e-05	Up	Chd5	124.58	3.44098	1.69165	2.03409	0.0419421	0.169798	Up
Casq2	111.015	9.89457	2.57818	3.83781	0.000124134	0.00100145	Up	Cadm2	306.096	10.0461	1.75801	5.71448	1.10039e-08	2.04891e-07	Up	Chga	88.0357	9.78172	2.12459	4.60405	4.14351e-06	7.00213e-05	Up
Cast	2748.77	0.632618	0.272502	2.32152	0.0202591	0.0776341	Up	Cadm3	246.041	4.51514	0.951313	4.74622	2.0725e-06	2.68988e-05	Up	Chgb	788.274	12.9444	3.19552	4.0508	5.10436e-05	0.000648198	Up
Cat	2447.07	2.15343	0.259994	8.28259	1.20526e-16	4.70177e-15	Up	Cadm4	133.024	5.35208	1.18299	4.52418	6.06303e-06	7.00071e-05	Up	Chl1	466.681	2.88319	0.863229	3.34	0.000837771	0.00735634	Up
Cav1	4198.82	2.92607	0.232167	12.6033	2.02576e-36	1.90937e-34	Up	Cadps	396.624	11.8766	3.67131	3.23499	0.00121648	0.00762094	Up	Chmp7	1653.9	0.687635	0.296811	2.31675	0.0205176	0.0996175	Up
Cbl	1938.02	0.560022	0.277474	2.01829	0.0435612	0.140977	Up	Calb1	2716.41	9.63434	2.8691	3.35797	0.000785182	0.00521323	Up	Chordc1	1180.98	0.725296	0.346488	2.09328	0.0363244	0.153257	Up
Cbln1	44.2894	8.56917	2.28178	3.75548	0.00017301	0.00133745	Up	Calm1	9520.21	0.868529	0.175833	4.93951	7.83192e-07	1.10105e-05	Up	Chrdl1	45.3723	7.39193	3.47475	2.12733	0.033393	0.14428	Up
Cbln2	133.519	10.161	1.76464	5.75813	8.50521e-09	1.52741e-07	Up	Calm3	8780.6	0.484203	0.182087	2.65918	0.00783307	0.0362978	Up	Chrna4	93.2171	22.5894	3.41387	6.61694	3.6672e-11	1.57287e-09	Up
Cbx3	3758.46	0.755124	0.1772	4.26141	2.0314e-05	0.000194489	Up	Caln1	108.695	6.89274	1.73866	3.96439	7.35829e-05	0.000657586	Up	Chrnb2	204.22	10.9957	2.38946	4.60176	4.18943e-06	7.06405e-05	Up
Ccdc102a	391.949	1.81319	0.499785	3.62795	0.000285686	0.00208227	Up	Calr	19051.3	0.33991	0.106326	3.19688	0.00138922	0.00854308	Up	Chst1	1549.43	2.4467	0.341438	7.16586	7.72983e-13	4.21844e-11	Up
Ccdc104	546.81	1.18793	0.457686	2.59551	0.00944501	0.0418354	Up	Calr3	36.9836	3.67324	1.56194	2.35172	0.0186869	0.0729452	Up	Chst11	1769.38	1.22776	0.350673	3.50116	0.000463234	0.00444997	Up
Ccdc107	32.0614	8.10321	2.53804	3.1927	0.00140949	0.00835511	Up	Caly	39.8808	6.17318	2.12131	2.91008	0.00361331	0.0191203	Up	Chst9	18.8421	6.11117	2.94421	2.07566	0.0379258	0.157517	Up
Ccdc136	159.899	5.93724	1.30563	4.54741	5.43111e-06	5.91652e-05	Up	Camk2a	123.751	4.27096	1.35296	3.15674	0.00159542	0.00962636	Up	Cisd2	818.289	0.955112	0.411586	2.32056	0.0203104	0.0989272	Up
Ccdc141	5281.52	8.64844	1.12112	7.71411	1.21828e-14	4.02777e-13	Up	Camk2b	544.73	5.93575	1.80386	3.29058	0.000999824	0.0064421	Up	Ckb	684.1	2.52623	0.892456	2.83065	0.00464536	0.0307781	Up
Ccdc28b	512.289	1.43178	0.426879	3.35407	0.000796317	0.00511389	Up	Camk2n1	582.393	1.96577	0.429866	4.57299	4.80809e-06	5.6938e-05	Up	Clcn3	2744.13	1.89869	0.299308	6.3436	2.2446e-10	8.71843e-09	Up
Ccdc47	5217.01	0.596935	0.191755	3.11301	0.00185187	0.010533	Up	Camta1	439.826	2.00293	0.641073	3.12434	0.00178203	0.0105454	Up	Cldn11	263.086	4.08731	1.24841	3.27402	0.00106031	0.00897402	Up
Ccdc64b	23.6314	7.66355	3.27103	2.34286	0.0191366	0.0742896	Up	Canx	16730.4	0.346239	0.10802	3.20531	0.00134916	0.00835011	Up	Cldn5	14741	2.6443	0.135872	19.4617	2.32048e-84	1.47215e-81	Up
Ccdc65	16.9242	7.18122	3.16405	2.26963	0.0232299	0.0862524	Up	Cap1	6146.18	0.557942	0.135316	4.12326	3.73542e-05	0.000359742	Up	Clec16a	1123.78	1.07414	0.52186	2.05829	0.0395625	0.162629	Up
Ccdc74a	14.9754	7.00432	3.34677	2.09286	0.0363615	0.122374	Up	Capg	341.957	3.3512	0.482637	6.94353	3.82426e-12	1.04843e-10	Up	Clic6	140.753	5.77895	1.33287	4.33571	1.45293e-05	0.000212919	Up
Ccdc85a	1311	11.0263	1.06951	10.3096	6.37343e-25	3.98011e-23	Up	Capn7	1757.23	0.562116	0.244073	2.30307	0.021275	0.0809324	Up	Clint1	3224.22	0.771911	0.293872	2.62669	0.00862187	0.0506438	Up
Ccdc85b	1280.58	0.956054	0.358925	2.66366	0.0077295	0.0353725	Up	Capns1	4961.78	0.279492	0.132643	2.10709	0.0351094	0.11886	Up	Clip1	3378.87	1.16327	0.233624	4.97926	6.38292e-07	1.31868e-05	Up
Ccdc85c	60.4727	9.01812	2.14014	4.2138	2.51106e-05	0.000236239	Up	Capza2	6480.18	0.626219	0.197812	3.16572	0.00154698	0.00937823	Up	Clip4	91.5511	8.40197	2.11321	3.97592	7.01084e-05	0.000857407	Up
Ccdc88a	2573.03	0.694942	0.248919	2.79184	0.00524091	0.0255726	Up	Capzb	10719.3	0.537562	0.154898	3.47042	0.000519649	0.00366783	Up	Clstn2	102.454	10.0004	2.42139	4.13002	3.62725e-05	0.000475697	Up
Ccdc90a	694.27	0.98997	0.389678	2.54048	0.01107	0.0476694	Up	Car10	67.4518	9.32025	2.04711	4.55289	5.29137e-06	6.19811e-05	Up	Clstn3	1143.37	11.0882	2.68211	4.13414	3.56291e-05	0.000468875	Up
Ccdc91	363.441	1.98351	0.562736	3.52477	0.00042385	0.00295178	Up	Car2	1782.1	0.652884	0.213411	3.05929	0.00221866	0.0127467	Up	Cltc	19253.7	0.554121	0.145939	3.79695	0.00014649	0.00163523	Up
Ccdc92	51.2536	8.77926	2.52111	3.4823	0.000497133	0.00339973	Up	Car4	5334.09	3.71524	0.198561	18.7108	4.0432e-78	9.42187e-76	Up	Clvs1	187.669	10.8737	2.09381	5.19326	2.06643e-07	4.8331e-06	Up
Cck	32.2649	8.11148	2.8711	2.82522	0.00472486	0.0234696	Up	Car5a	90.8862	3.67183	1.11982	3.27895	0.00104193	0.00667701	Up	Cmpk1	1985.09	0.720605	0.32056	2.24796	0.0245791	0.115613	Up
Ccl19	58.0266	2.82341	1.26774	2.22712	0.0259393	0.0939895	Up	Car7	51.7633	4.55102	2.08586	2.18184	0.0291211	0.103199	Up	Cmtm6	6027.37	1.39957	0.279818	5.00172	5.68206e-07	1.18939e-05	Up
Ccl27a	29.5176	7.98409	2.62856	3.03744	0.00238596	0.0130805	Up	Casc4	1256.53	1.11712	0.237095	4.71171	2.4565e-06	3.14579e-05	Up	Cnih2	99.4245	7.4638	2.08824	3.57421	0.000351286	0.00353048	Up
Ccnd1	9779.25	0.725258	0.196912	3.68315	0.000230365	0.00172122	Up	Cask	1364.16	1.02196	0.237363	4.30548	1.66622e-05	0.000175044	Up	Cnksr2	131.141	10.3566	2.17457	4.76257	1.91142e-06	3.52768e-05	Up
Ccni	4994.74	0.606222	0.16807	3.60695	0.000309813	0.00223133	Up	Caskin1	115.207	2.96839	0.944447	3.14299	0.00167232	0.0100352	Up	Cnnm1	78.008	8.17227	2.3611	3.46122	0.000537729	0.00506023	Up
Ccnjl	442.599	2.00272	0.517476	3.87017	0.00010876	0.000888288	Up	Casp6	1332.73	1.913	0.339103	5.64136	1.6871e-08	3.05267e-07	Up	Cnot7	1470.24	1.46977	0.402519	3.65144	0.000260776	0.0027199	Up
Cct3	2018.26	0.539272	0.255342	2.11196	0.0346899	0.11801	Up	Cast	2964.01	0.761075	0.173999	4.37401	1.21984e-05	0.000131657	Up	Cnr1	36.6082	8.51564	2.81144	3.02893	0.00245424	0.0181399	Up
Cct5	3365.45	0.623953	0.317239	1.96682	0.0492036	0.15427	Up	Cat	3213.56	1.18204	0.199263	5.93208	2.99125e-09	5.99809e-08	Up	Cntn1	682.773	11.3008	1.78139	6.34384	2.24101e-10	8.71843e-09	Up
Cct6a	1878.38	0.997265	0.322518	3.09212	0.00198733	0.0111861	Up	Cbln1	49.3893	8.87133	1.99447	4.44795	8.6693e-06	9.72529e-05	Up	Cntn3	39.879	8.63913	4.10532	2.10437	0.0353458	0.150328	Up
Cd109	491.04	1.04726	0.529191	1.97897	0.047819	0.150989	Up	Cbln2	148.658	10.4608	1.64721	6.35064	2.14424e-10	4.9443e-09	Up	Cntn4	69.0252	9.43055	2.58703	3.64532	0.000267056	0.00277721	Up
Cd151	3805.19	0.60964	0.212852	2.86415	0.00418127	0.0211502	Up	Cbln4	27.3896	8.02016	3.71248	2.16032	0.0307476	0.107648	Up	Cntn5	22.1722	7.79224	3.31961	2.34733	0.0189083	0.0937946	Up
Cd200	1170.52	3.59249	0.33992	10.5686	4.16528e-26	2.74818e-24	Up	Cbs	38.4605	4.78924	1.95465	2.45018	0.0142784	0.0587327	Up	Cntn6	105.929	22.767	3.33668	6.82326	8.89953e-12	4.14386e-10	Up
Cd276	216.069	6.44583	1.25344	5.14251	2.71091e-07	3.84467e-06	Up	Cbx6	2568.25	0.408897	0.180885	2.26054	0.0237879	0.0883074	Up	Cntnap2	223.275	11.1245	1.72597	6.44537	1.1532e-10	4.63287e-09	Up
Cd2ap	6137.6	0.822672	0.225272	3.6519	0.000260308	0.00191756	Up	Ccbp2	1953.97	0.966122	0.23594	4.09477	4.2258e-05	0.000401935	Up	Cntnap4	42.2916	8.72372	3.07221	2.83956	0.00451763	0.0301162	Up
Cd2bp2	1201.36	0.613042	0.307834	1.99147	0.0464296	0.147863	Up	Ccdc126	272.779	1.48796	0.682158	2.18126	0.0291643	0.10328	Up	Cntnap5b	147.018	10.5215	2.27813	4.61847	3.86572e-06	6.59121e-05	Up
Cd320	489.26	4.82048	0.890719	5.4119	6.23606e-08	9.78616e-07	Up	Ccdc136	195.647	3.09459	0.659138	4.69491	2.66724e-06	3.39018e-05	Up	Cobll1	5762.26	2.29678	0.267315	8.59202	8.54549e-18	7.22853e-16	Up
Cd34	10604.6	3.91788	0.21021	18.6379	1.58238e-77	3.81152e-75	Up	Ccdc141	5949.93	6.44303	0.755946	8.52313	1.55299e-17	6.18783e-16	Up	Cog1	632.312	1.09615	0.550472	1.99129	0.0464485	0.183029	Up
Cd40	459.758	3.28782	0.674553	4.87406	1.09326e-06	1.36545e-05	Up	Ccdc148	10.2666	6.60543	3.32752	1.98509	0.047134	0.149097	Up	Col19a1	40.886	7.24096	3.54441	2.04292	0.0410599	0.166884	Up
Cd82	2705.81	2.70589	0.276674	9.78004	1.37156e-22	7.59613e-21	Up	Ccdc149	157.784	2.26598	0.648948	3.49178	0.000479817	0.0034244	Up	Col1a1	676.457	4.6612	1.21902	3.82373	0.00013145	0.00148366	Up
Cd83	143.082	3.5494	1.74899	2.02939	0.0424182	0.138132	Up	Ccdc152	32.8869	4.35398	1.91549	2.27303	0.0230243	0.0860544	Up	Col1a2	704.233	2.90674	1.20101	2.42024	0.0155102	0.0803808	Up
Cd93	33410.6	1.49308	0.112443	13.2786	3.0804e-40	3.17994e-38	Up	Ccdc47	5639.62	0.716171	0.190856	3.75242	0.000175138	0.00142369	Up	Col6a1	184.291	3.1889	1.26638	2.51812	0.0117983	0.0649224	Up
Cd97	4341.42	0.567941	0.166037	3.42057	0.000624904	0.00414645	Up	Ccdc48	159.656	1.86872	0.653004	2.86172	0.0042135	0.0217272	Up	Col7a1	206.436	5.60003	1.49641	3.74232	0.000182332	0.00198254	Up
Cdc23	1675.31	1.06698	0.265639	4.01664	5.90337e-05	0.000510158	Up	Ccdc72	1191.3	0.577632	0.237198	2.43523	0.0148822	0.0608262	Up	Col8a1	78.4831	3.42827	1.71576	1.9981	0.0457055	0.181039	Up
Cdc42ep3	602.659	1.25297	0.570907	2.1947	0.0281854	0.100167	Up	Ccdc8	796.483	1.41304	0.395222	3.5753	0.000349828	0.00260803	Up	Col8a2	25.1326	7.97359	3.13676	2.54199	0.0110225	0.0615207	Up
Cdc42ep4	2102.53	0.632971	0.231807	2.7306	0.00632198	0.0298308	Up	Ccdc85b	1597.48	0.527876	0.262052	2.01439	0.0439684	0.141265	Up	Col9a2	122.395	4.38172	1.30809	3.34971	0.000808951	0.00712382	Up
Cdc42se1	1773.55	1.82421	0.387641	4.70594	2.52703e-06	2.95209e-05	Up	Ccdc90b	546.905	1.11007	0.3419	3.24676	0.00116726	0.00735156	Up	Col9a3	85.3481	9.73718	2.10067	4.63528	3.56453e-06	6.12567e-05	Up
Cdca7l	144.479	3.00287	0.917104	3.27429	0.00105926	0.00657166	Up	Ccdc93	790.785	0.796193	0.288034	2.76424	0.00570563	0.0280326	Up	Coro1a	40.5325	5.55264	2.25952	2.45745	0.0139928	0.074362	Up
Cdh10	55.2592	8.88799	2.21485	4.01291	5.99739e-05	0.000517398	Up	Cck	35.9268	6.98016	2.35582	2.96294	0.00304718	0.0166604	Up	Coro1c	8561.75	0.859623	0.169726	5.06477	4.08886e-07	8.86852e-06	Up
Cdh11	1650.76	5.29472	0.410258	12.9058	4.17359e-38	4.00849e-36	Up	Ccl19	56.6302	9.06839	1.94366	4.66562	3.0769e-06	3.8287e-05	Up	Coro2b	2119.26	0.799848	0.286945	2.78746	0.00531232	0.0342445	Up
Cdh12	45.0019	8.5917	3.10256	2.76923	0.00561893	0.0271293	Up	Ccl27a	35.1265	3.95043	1.91348	2.06453	0.0389679	0.128915	Up	Cp	273.759	5.11593	1.56346	3.27218	0.00106722	0.00902248	Up
Cdh18	75.7653	9.34323	2.35448	3.96828	7.23932e-05	0.000615099	Up	Ccnd3	1803.89	0.57452	0.281833	2.03851	0.0414991	0.135225	Up	Cpe	7151.74	3.92635	0.316468	12.4068	2.40076e-35	4.4041e-33	Up
Cdh2	4887.86	7.97364	0.400699	19.8993	4.12315e-88	1.20325e-85	Up	Ccny	2954.12	0.651042	0.17335	3.75565	0.000172889	0.0014069	Up	Cpeb1	29.4093	8.2004	2.98027	2.75156	0.00593117	0.037389	Up
Cdh20	26.5624	7.83168	2.69765	2.90315	0.00369426	0.0190229	Up	Ccpg1	2249.71	0.817361	0.197567	4.13713	3.51674e-05	0.000340601	Up	Cpeb3	151.279	3.29753	1.10023	2.99712	0.00272543	0.01977	Up
Cdh6	42.8536	8.52132	2.33206	3.654	0.00025819	0.00190473	Up	Cd276	313.779	1.66372	0.551571	3.01634	0.00255849	0.0144032	Up	Cplx1	298.402	10.1067	1.84844	5.46772	4.55873e-08	1.20506e-06	Up
Cdh8	32.7042	8.13102	2.72417	2.98477	0.00283789	0.0151744	Up	Cd2ap	7249.39	0.606696	0.166709	3.63926	0.000273426	0.00210055	Up	Cpne3	2204.82	0.653795	0.321752	2.03199	0.0421551	0.170389	Up
Cdk14	274.265	8.22862	1.10838	7.42402	1.13616e-13	3.44824e-12	Up	Cd320	599.903	2.84642	0.348797	8.16068	3.33141e-16	1.23463e-14	Up	Cpne6	25.4027	7.98826	3.313	2.41118	0.0159009	0.0819867	Up
Cdk5r2	114.841	9.94336	2.25391	4.41161	1.02603e-05	0.000104989	Up	Cd40	675.814	1.16056	0.541303	2.14402	0.0320316	0.111213	Up	Cpne9	309.302	3.91725	1.82825	2.14262	0.0321435	0.140109	Up
Cdkl2	78.5609	3.72388	1.60206	2.32443	0.0201027	0.0771909	Up	Cd59a	782.707	2.06273	0.331556	6.22136	4.92875e-10	1.07983e-08	Up	Cpsf4	170.608	2.58905	0.940562	2.75266	0.00591132	0.0373003	Up
Cdkn1a	1105.1	0.909879	0.424972	2.14103	0.0322712	0.111553	Up	Cd81	3089.66	0.620772	0.229575	2.70401	0.00685082	0.0324802	Up	Cpt1a	5763.8	1.05119	0.240363	4.37334	1.22358e-05	0.000182829	Up
Cdkn2b	280.812	3.32314	0.614195	5.41057	6.2824e-08	9.84869e-07	Up	Cd82	2802.42	3.81209	0.194242	19.6255	9.36226e-86	2.48261e-83	Up	Cpxm2	41.4036	8.69325	2.69577	3.22478	0.00126069	0.0103811	Up
Cdr1	88.9456	9.57464	2.23791	4.27839	1.88253e-05	0.000181726	Up	Cda	12.805	6.92321	3.08591	2.24349	0.024865	0.0912706	Up	Cr1l	1913.7	0.960968	0.333491	2.88155	0.0039573	0.0270682	Up
Cds1	254.033	4.6121	1.57423	2.92974	0.00339242	0.0176664	Up	Cdc23	2046.38	0.690537	0.207297	3.33115	0.000864889	0.00566524	Up	Creg2	61.7541	3.72015	1.64961	2.25517	0.0241226	0.113959	Up
Celf2	819.284	3.23147	0.683794	4.72579	2.29217e-06	2.69641e-05	Up	Cdc34	503.462	0.835449	0.392949	2.1261	0.0334949	0.114938	Up	Crmp1	868.999	2.75367	0.996066	2.76454	0.00570025	0.036254	Up
Celsr2	393.52	1.92244	0.759446	2.53137	0.0113617	0.0488009	Up	Cdc42	10060.2	0.436869	0.128997	3.38665	0.000707515	0.00476218	Up	Crtac1	21.4294	7.74322	3.33037	2.32503	0.0200702	0.0979766	Up
Cend1	247.864	11.0534	2.04648	5.40117	6.6206e-08	1.03362e-06	Up	Cdc42ep3	537.674	2.89172	0.415613	6.95772	3.4582e-12	9.53175e-11	Up	Csdc2	365.829	4.8095	1.3353	3.60181	0.000316014	0.00321848	Up
Cenpn	105.323	4.0373	1.09592	3.68394	0.000229656	0.00171676	Up	Cdc42ep4	2242.88	0.800865	0.181478	4.41301	1.01941e-05	0.00011215	Up	Csf1	1790.81	0.86949	0.288405	3.01483	0.00257125	0.0188311	Up
Cep68	1785.75	0.760853	0.301323	2.52504	0.0115686	0.0495493	Up	Cdc42se1	2595.63	0.553219	0.19718	2.80566	0.00502143	0.0252137	Up	Csf1r	25.9757	4.96521	2.19811	2.25885	0.0238925	0.113153	Up
Cep78	158.627	2.107	0.741934	2.83988	0.00451311	0.0225656	Up	Cdh10	61.3459	9.18347	1.97605	4.64738	3.36177e-06	4.12972e-05	Up	Csmd3	43.3725	8.7603	2.64918	3.30679	0.000943714	0.00813646	Up
Cep97	376.622	1.30581	0.525773	2.48359	0.0130065	0.0543131	Up	Cdh11	2357.76	1.67392	0.195515	8.56159	1.11321e-17	4.50558e-16	Up	Csnk1g3	1519.44	0.794835	0.300264	2.64712	0.00811805	0.0483589	Up
Cerkl	30.4481	8.02855	2.5725	3.12091	0.00180291	0.0103242	Up	Cdh12	49.6824	8.87928	2.83255	3.13473	0.00172012	0.0102421	Up	Csnk2a1	4051.14	0.60176	0.235682	2.55327	0.0106717	0.0598479	Up
Cfl1	18908.3	0.636704	0.172096	3.6997	0.000215851	0.001628	Up	Cdh13	118.32	1.57181	0.744786	2.11042	0.0348222	0.118044	Up	Csnk2b	1200.28	1.18042	0.526336	2.2427	0.0249159	0.116657	Up
Cgnl1	9719.69	2.87925	0.232178	12.4011	2.57903e-35	2.34352e-33	Up	Cdh18	83.7513	9.63259	2.16404	4.4512	8.5391e-06	9.60025e-05	Up	Cspg5	387.002	3.26746	1.53349	2.13074	0.0331108	0.143345	Up
Chd3	5301.27	2.01134	0.2486	8.09066	5.934e-16	2.20707e-14	Up	Cdh2	5516.63	6.0621	0.222675	27.224	3.37879e-163	2.59829e-160	Up	Csrp2	2403.47	2.12493	0.348139	6.10368	1.03655e-09	3.55461e-08	Up
Chd4	13163.7	0.247478	0.124895	1.98149	0.0475363	0.150598	Up	Cdh20	29.6482	8.13521	2.30326	3.53204	0.000412362	0.00299865	Up	Cst3	2561.63	1.14217	0.246134	4.64041	3.47714e-06	5.9958e-05	Up
Chd5	99.3207	9.73386	1.97888	4.91888	8.70406e-07	1.11088e-05	Up	Cdhr1	16.046	7.24829	3.43177	2.11211	0.0346766	0.117706	Up	Ctbs	348.527	1.27585	0.60214	2.11886	0.0341027	0.146614	Up
Chdh	13.8593	6.89311	3.40872	2.0222	0.0431561	0.139965	Up	Cdk5r2	127.207	8.7663	2.02098	4.33766	1.44008e-05	0.000153695	Up	Cthrc1	594.864	3.03403	0.520491	5.82917	5.57026e-09	1.71686e-07	Up
Chgb	688.905	9.33325	2.45546	3.80102	0.000144102	0.00114333	Up	Cdkl2	82.3158	5.64476	1.71104	3.29902	0.000970234	0.00628303	Up	Ctla2a	4675.31	1.34278	0.355647	3.7756	0.000159621	0.00177013	Up
Chmp7	1488.96	0.55277	0.273981	2.01755	0.0436385	0.141167	Up	Cdkn1a	1187.26	1.07417	0.288815	3.71923	0.000199828	0.00159904	Up	Ctla2b	770.631	1.6954	0.627782	2.70062	0.00692107	0.0423044	Up
Chn1	227.649	5.08632	1.68858	3.01219	0.00259367	0.0140568	Up	Cdr1	98.3575	9.86454	2.06779	4.77056	1.83712e-06	2.41908e-05	Up	Ctnna2	156.01	10.6071	2.14194	4.95211	7.34116e-07	1.48837e-05	Up
Chn2	465.167	1.01603	0.435847	2.33117	0.0197444	0.0761234	Up	Cds1	286.518	3.98806	1.22264	3.26186	0.00110685	0.00703732	Up	Ctnnbip1	2432.51	0.949137	0.253441	3.74501	0.000180388	0.00196747	Up
Chpf	86.7397	2.83152	1.35756	2.08574	0.0370024	0.1241	Up	Celf2	1016.75	2.07568	0.520161	3.99046	6.59466e-05	0.000597678	Up	Ctnnd2	270.775	11.4026	1.86313	6.12016	9.34834e-10	3.24972e-08	Up
Chrna4	81.3979	20.72	3.28895	6.29989	2.97848e-10	6.47542e-09	Up	Celf4	103.768	2.9057	1.07171	2.71129	0.00670226	0.0319928	Up	Ctps	619.155	1.34176	0.467956	2.86727	0.00414028	0.0280802	Up
Chrnb1	163.959	2.58764	0.752669	3.43796	0.000586117	0.00391993	Up	Cend1	274.181	9.88152	1.89214	5.2224	1.76623e-07	2.72737e-06	Up	Ctsc	479.322	6.19327	1.00133	6.18503	6.20909e-10	2.25094e-08	Up
Chst1	1215.08	3.86694	0.364967	10.5953	3.13284e-26	2.09431e-24	Up	Cep68	2003.56	0.740045	0.208519	3.54906	0.000386611	0.0028423	Up	Ctsf	55.8847	9.12589	2.53555	3.59918	0.000319223	0.00324466	Up
Chst10	45.8724	8.61935	3.0931	2.78664	0.00532583	0.0259086	Up	Cerkl	35.2759	4.65735	1.81335	2.56836	0.010218	0.0450657	Up	Ctsh	2712.99	2.19551	0.326952	6.71508	1.87963e-11	8.34379e-10	Up
Chst11	1083.76	7.44725	2.43204	3.06215	0.00219757	0.0121886	Up	Ces2b	112.797	2.83745	0.933009	3.04118	0.00235649	0.0134233	Up	Ctsk	20.3977	7.67186	3.42759	2.23827	0.0252038	0.117643	Up
Chst9	16.1216	7.11125	3.22242	2.2068	0.027328	0.0980383	Up	Cetn2	348.417	1.13235	0.503027	2.25106	0.0243815	0.0900329	Up	Ctsl	6346.65	1.47728	0.249024	5.9323	2.98716e-09	9.63612e-08	Up
Cisd2	658.964	1.29497	0.497271	2.60415	0.00921024	0.0409989	Up	Cfh	464.73	2.38818	0.694251	3.43993	0.000581856	0.00404929	Up	Ctsw	334.435	10.2683	1.61321	6.36517	1.95077e-10	7.65525e-09	Up
Ckb	534.292	4.25883	0.761928	5.58955	2.27658e-08	3.81195e-07	Up	Cfi	19.6434	7.54209	2.82318	2.67149	0.00755154	0.035165	Up	Cxcl12	12435.7	1.78534	0.224579	7.94971	1.86944e-15	1.27642e-13	Up
Ckmt1	190.167	10.6711	2.11501	5.04542	4.52536e-07	6.1436e-06	Up	Cfl1	22621	0.393265	0.150839	2.60718	0.00912909	0.0411368	Up	Cxcl14	40.5267	8.66222	2.89052	2.99677	0.00272861	0.0197837	Up
Clca5	71.7261	9.26431	2.06941	4.47679	7.57728e-06	8.00176e-05	Up	Cgnl1	13497.8	1.2757	0.155782	8.18899	2.63421e-16	9.83355e-15	Up	Cxcr4	660.386	1.97039	0.574434	3.43014	0.00060326	0.00558033	Up
Clcn3	2436.46	1.75445	0.361964	4.84702	1.2533e-06	1.55003e-05	Up	Chchd2	2519.4	0.503746	0.200105	2.51741	0.0118221	0.0505769	Up	Cxcr7	439.357	1.49038	0.565542	2.63531	0.00840604	0.0496857	Up
Cldn11	225.586	4.56371	1.59093	2.86858	0.00412316	0.0209121	Up	Chd5	119.659	3.52979	1.66202	2.1238	0.033687	0.11534	Up	Cxx1a	1507.15	1.18118	0.446874	2.64321	0.0082124	0.0488255	Up
Cldn5	12186	3.25775	0.26927	12.0984	1.07628e-33	9.27983e-32	Up	Chga	86.1901	6.24175	1.22801	5.08282	3.7188e-07	5.5261e-06	Up	Cxxc4	236.125	4.32081	0.824881	5.2381	1.6224e-07	3.87797e-06	Up
Clec2l	209.646	9.53407	4.78218	1.99367	0.0461886	0.14725	Up	Chgb	763.577	7.84324	1.79457	4.37053	1.23944e-05	0.000133585	Up	Cyb5r1	139.094	3.91451	1.40704	2.78208	0.0054011	0.0346699	Up
Clic5	675.325	5.49446	0.973294	5.64523	1.64964e-08	2.81906e-07	Up	Chm	1105.93	0.639047	0.267193	2.39171	0.0167701	0.067098	Up	Cybasc3	299.892	1.94535	0.86769	2.24199	0.0249623	0.116731	Up
Clic6	119.776	10.0047	1.81998	5.49719	3.85895e-08	6.24969e-07	Up	Chmp2b	840.05	0.781946	0.342499	2.28306	0.0224266	0.0843742	Up	Cyfip2	573.987	3.48541	1.2293	2.83529	0.00457848	0.0304552	Up
Clint1	2827.39	0.731145	0.214445	3.40948	0.000650876	0.00430185	Up	Chn2	437.757	1.93793	0.422314	4.58883	4.45729e-06	5.32245e-05	Up	Cyp2d22	887.824	2.49786	0.478958	5.21521	1.8361e-07	4.32093e-06	Up
Clip3	304.03	6.9917	1.13442	6.16323	7.12742e-10	1.48162e-08	Up	Chrna4	89.8572	22.4656	4.78526	4.69475	2.66938e-06	3.39018e-05	Up	Cyp46a1	94.2189	9.87954	2.63115	3.75484	0.000173451	0.00190271	Up
Clip4	79.5631	9.4138	2.15137	4.37573	1.21029e-05	0.000122278	Up	Chrnb1	190.123	2.22586	0.66189	3.36288	0.000771325	0.00513772	Up	Cyp8b1	35.3176	8.4637	3.03543	2.7883	0.00529854	0.0341928	Up
Clmn	251.029	5.6049	1.76794	3.17029	0.00152285	0.00894664	Up	Chrnb2	209.038	4.0134	1.56882	2.55824	0.0105205	0.0460509	Up	Cyth1	1150.63	0.943959	0.355012	2.65895	0.00783854	0.0468773	Up
Clptm1	1545.34	0.598445	0.261462	2.28884	0.0220885	0.0831539	Up	Chst1	1307.28	4.96732	0.296954	16.7275	8.25762e-63	1.44321e-60	Up	D10Bwg1379e	155.338	9.16687	2.14967	4.26432	2.00515e-05	0.000281128	Up
Clstn1	1482.9	3.62922	0.463937	7.82266	5.17203e-15	1.78783e-13	Up	Chst11	1888.5	0.798608	0.276517	2.8881	0.00387581	0.0202548	Up	D3Bwg0562e	537.2	2.93737	1.02985	2.85223	0.00434142	0.029223	Up
Clstn3	1002.36	7.73012	3.0417	2.54138	0.0110415	0.0475606	Up	Chst2	1693.36	2.13499	0.26834	7.95628	1.77292e-15	6.22547e-14	Up	D430041D05Rik	532.636	9.96336	1.59606	6.24247	4.30705e-10	1.59173e-08	Up
Clvs1	163.709	10.4549	2.03735	5.1316	2.87288e-07	4.0537e-06	Up	Chst9	17.9914	7.41453	2.71007	2.73592	0.00622068	0.030162	Up	D6Wsu116e	3646	0.714696	0.344668	2.07358	0.0381188	0.158141	Up
Cmklr1	483.269	1.31726	0.468064	2.81428	0.0048887	0.0241099	Up	Cirbp	1490.22	0.753773	0.246275	3.0607	0.00220823	0.0126994	Up	D730039F16Rik	53.3511	4.92633	2.09207	2.35476	0.0185348	0.0924042	Up
Cmpk1	1599.86	1.02765	0.45003	2.28351	0.0224004	0.083974	Up	Cisd2	675.645	1.77208	0.334004	5.30558	1.12316e-07	1.79939e-06	Up	D7Ertd715e	100.205	6.46252	1.67472	3.85888	0.00011391	0.00131195	Up
Cmtm6	6108.49	0.710837	0.177033	4.01527	5.93782e-05	0.000512842	Up	Ckb	636.84	2.92751	0.782495	3.74125	0.000183108	0.00148221	Up	Daam1	2736.89	0.9777	0.250753	3.89906	9.65664e-05	0.00113276	Up
Cnih2	87.7221	5.92829	1.97696	2.9987	0.00271139	0.014591	Up	Clca5	94	2.47407	0.972215	2.54478	0.0109347	0.0474804	Up	Dab1	258.524	11.3359	2.01188	5.63445	1.75615e-08	5.02616e-07	Up
Cnksr2	114.368	9.93737	2.10061	4.7307	2.23743e-06	2.6419e-05	Up	Clcn3	2622.66	1.98391	0.193163	10.2707	9.55574e-25	5.6964e-23	Up	Dab2	4100.59	1.80855	0.239758	7.54323	4.5846e-14	2.82612e-12	Up
Cnnm1	67.8443	9.18391	2.43528	3.7712	0.000162466	0.00126562	Up	Clcn4-2	1574.8	0.633485	0.251806	2.51577	0.0118773	0.0507848	Up	Dach1	3421.41	3.19052	0.588378	5.42257	5.87492e-08	1.5187e-06	Up
Cnot6l	2094.6	0.556674	0.235022	2.36861	0.0178551	0.0702964	Up	Cldn11	243.781	5.90203	1.32839	4.44301	8.87078e-06	9.92237e-05	Up	Dach2	94.9251	5.55314	1.77172	3.13432	0.00172254	0.0135123	Up
Cnot7	1365.6	1.12891	0.298999	3.77564	0.000159595	0.00124774	Up	Cldn12	258.392	1.27133	0.575155	2.21041	0.0270767	0.0977099	Up	Dagla	538.381	6.5944	0.800124	8.24172	1.69746e-16	1.27318e-14	Up
Cntn1	595.711	10.8561	1.73332	6.26316	3.77246e-10	8.08574e-09	Up	Cldn25	1598.46	0.522131	0.257678	2.02629	0.0427351	0.138313	Up	Dap	804.318	1.0638	0.444254	2.39457	0.0166397	0.0849904	Up
Cntn2	167.187	10.4852	1.87901	5.58018	2.40274e-08	4.00676e-07	Up	Cldn5	16645.7	1.50023	0.111563	13.4474	3.19067e-41	3.29346e-39	Up	Dapk1	829.427	1.71559	0.654943	2.61945	0.00880717	0.0513785	Up
Cntn4	60.2269	9.01206	2.47198	3.64568	0.00026669	0.00196267	Up	Clec16a	1199.91	0.671744	0.281525	2.38609	0.0170286	0.0678671	Up	Darc	30.9009	6.79169	2.54426	2.66941	0.00759836	0.0457645	Up
Cntn5	19.2963	7.37002	3.06904	2.40141	0.016332	0.0652548	Up	Clec2l	231.441	9.55439	4.76936	2.00329	0.0451465	0.144206	Up	Dars	2363.89	0.56876	0.273881	2.07667	0.0378321	0.1573	Up
Cntn6	92.4976	22.2915	3.22111	6.92044	4.50247e-12	1.17397e-10	Up	Clgn	26.1883	7.95545	3.75122	2.12076	0.0339417	0.115979	Up	Dbc1	264.127	11.3668	1.98505	5.7262	1.02705e-08	3.05427e-07	Up
Cntnap1	446.905	1.98396	1.00562	1.97288	0.0485093	0.152597	Up	Clic6	139.423	4.61898	1.11939	4.12635	3.68571e-05	0.000355399	Up	Dbndd1	23.8475	7.89707	3.50915	2.25042	0.024422	0.115124	Up
Cntnap4	36.9172	8.30587	2.91999	2.84448	0.00444836	0.0223301	Up	Clint1	3329.73	0.531329	0.177116	2.99989	0.00270078	0.0150828	Up	Dbpht2	31.18	6.80495	2.538	2.68122	0.00733532	0.0444086	Up
Cntnap5b	128.668	8.61574	2.09487	4.11278	3.90917e-05	0.000355007	Up	Clip1	3383.12	1.01185	0.199046	5.08349	3.70569e-07	5.51195e-06	Up	Dcaf12l1	40.8002	8.67215	2.67683	3.23971	0.0011965	0.00994968	Up
Cobll1	4178.67	7.42386	1.22328	6.06882	1.28855e-09	2.58989e-08	Up	Clip3	374.678	3.04732	0.741555	4.10936	3.96759e-05	0.000379251	Up	Dcaf6	1441.95	1.46689	0.311989	4.70172	2.57977e-06	4.58338e-05	Up
Coil	238.94	1.26711	0.63076	2.00887	0.0445509	0.143142	Up	Clip4	89.05	6.60926	1.59177	4.15214	3.29376e-05	0.000323487	Up	Dcaf7	2953.44	0.583126	0.231646	2.51732	0.0118253	0.0650475	Up
Col15a1	559.104	3.17293	0.78656	4.03393	5.48521e-05	0.000478682	Up	Clmn	294.66	3.56273	1.20601	2.95414	0.00313543	0.017058	Up	Dcbld1	1635.18	2.58171	0.315174	8.19137	2.58267e-16	1.90892e-14	Up
Col18a1	3045.62	2.47075	0.396643	6.22916	4.6895e-10	9.95289e-09	Up	Cln5	656.219	1.98913	0.441583	4.50455	6.65143e-06	7.61153e-05	Up	Dcbld2	505.049	2.08163	0.639859	3.25326	0.00114091	0.00953952	Up
Col28a1	44.0036	8.5592	2.60931	3.28025	0.00103716	0.00645299	Up	Clstn3	1101.86	13.3507	3.74714	3.56291	0.000366764	0.00271455	Up	Dclk1	450.105	10.6994	1.78204	6.00398	1.92534e-09	6.34527e-08	Up
Col4a1	60624.6	0.797648	0.142381	5.6022	2.11654e-08	3.55687e-07	Up	Cltc	18309.1	0.617701	0.0917859	6.7298	1.69897e-11	4.3769e-10	Up	Dcn	134.052	8.95336	2.10002	4.26347	2.01279e-05	0.000281939	Up
Col4a2	55236.8	1.25936	0.165753	7.59786	3.01065e-14	9.67938e-13	Up	Clvs1	181.028	10.7448	1.92136	5.59229	2.24089e-08	3.94787e-07	Up	Dctn6	1427.9	0.881766	0.318629	2.76738	0.00565096	0.0359705	Up
Col4a3	255.544	6.55845	0.917224	7.15033	8.65725e-13	2.41941e-11	Up	Cmklr1	584.84	0.937991	0.342575	2.73806	0.00618025	0.0300418	Up	Dcx	275.859	9.98134	1.63166	6.11729	9.51793e-10	3.30114e-08	Up
Col4a4	22.7819	4.97537	2.39846	2.07441	0.0380417	0.126764	Up	Cml1	46.9536	3.32821	1.14843	2.89805	0.00375492	0.0197304	Up	Ddah1	3112.29	2.80811	0.273829	10.255	1.12425e-24	1.36943e-22	Up
Col7a1	176.557	7.51271	1.14519	6.56023	5.37237e-11	1.26396e-09	Up	Cmpk1	1809.13	0.960036	0.269595	3.56103	0.000369399	0.00273142	Up	Ddb1	13343.5	0.303867	0.143414	2.11881	0.0341065	0.146614	Up
Col8a2	22.3387	5.23993	2.37836	2.20317	0.027583	0.0987199	Up	Cmtm6	5991.29	1.26627	0.172435	7.34349	2.08102e-13	6.33785e-12	Up	Ddb2	39.8921	8.64017	2.67034	3.23561	0.00121384	0.0100664	Up
Col9a2	105.144	4.82333	1.64693	2.92868	0.00340402	0.0177086	Up	Cmtm8	352.395	0.873257	0.431315	2.02464	0.0429045	0.138716	Up	Ddc	1137.06	5.00854	2.13131	2.34998	0.0187742	0.0932344	Up
Col9a3	78.8717	3.98199	1.82598	2.18074	0.0292023	0.10277	Up	Cnbp	5387.8	0.336921	0.13841	2.43421	0.0149242	0.060933	Up	Ddi2	2129.85	1.7084	0.322738	5.29345	1.20031e-07	2.94298e-06	Up
Commd4	347.913	1.35149	0.504585	2.67842	0.00739708	0.034067	Up	Cnih2	107.037	3.02354	1.36423	2.2163	0.0266709	0.0965325	Up	Ddx19b	727.703	1.22155	0.492958	2.47799	0.0132123	0.0711353	Up
Commd6	341.417	1.11805	0.551705	2.02654	0.04271	0.138904	Up	Cnksr2	126.523	10.2279	1.95742	5.22519	1.73976e-07	2.68919e-06	Up	Ddx25	49.8827	8.96204	2.54947	3.51525	0.00043934	0.00427164	Up
Comt	564.02	0.884045	0.413601	2.13743	0.0325627	0.112279	Up	Cnot6l	2131.87	0.905272	0.188808	4.79467	1.62939e-06	2.1697e-05	Up	Def6	1296.87	3.28689	0.477031	6.8903	5.56736e-12	2.71694e-10	Up
Cox5a	1537.5	0.864425	0.306144	2.82359	0.00474895	0.0235354	Up	Cnot7	1714.14	0.64683	0.252792	2.55875	0.010505	0.0460044	Up	Dennd4a	555.7	2.02223	0.563892	3.58619	0.000335542	0.0033924	Up
Cp	246.458	3.84684	0.771566	4.98575	6.17209e-07	8.12328e-06	Up	Cntn1	664.807	6.68498	0.957743	6.97992	2.95338e-12	8.21391e-11	Up	Depdc7	21.6689	7.759	3.38924	2.2893	0.0220618	0.105733	Up
Cpe	5958.27	5.4729	0.292181	18.7312	2.75638e-78	6.97133e-76	Up	Cntn2	196.111	4.08886	0.918886	4.4498	8.59494e-06	9.64892e-05	Up	Derl2	538.667	1.12966	0.49777	2.26944	0.0232415	0.11069	Up
Cpeb1	25.4783	7.77178	2.76289	2.81292	0.00490946	0.0241808	Up	Cntn3	38.7055	7.09501	3.08334	2.30108	0.0213873	0.0811989	Up	Dgka	1261.44	2.3959	0.424053	5.65001	1.60441e-08	4.63542e-07	Up
Cplx1	259.956	11.1221	1.86018	5.97902	2.24478e-09	4.33942e-08	Up	Cntn5	21.4213	7.66547	2.61261	2.93402	0.003346	0.0179496	Up	Dgkb	66.8173	6.98473	3.14685	2.21959	0.0264463	0.121615	Up
Cpne6	22.1535	7.56899	3.0931	2.44705	0.0144029	0.059146	Up	Cntn6	102.11	22.4197	4.78519	4.68522	2.79655e-06	3.53128e-05	Up	Dgkg	228.64	9.70343	1.90677	5.08892	3.60106e-07	7.95786e-06	Up
Cpne9	253.395	9.61435	1.8299	5.25403	1.48807e-07	2.20737e-06	Up	Cntnap1	405.235	5.2113	1.0324	5.04774	4.47066e-07	6.56095e-06	Up	Dgki	153.615	6.2634	1.50681	4.15673	3.22837e-05	0.000432295	Up
Cpsf2	1678.19	0.553557	0.268421	2.06227	0.0391819	0.129822	Up	Cntnap2	216.476	8.58051	1.22149	7.02464	2.14626e-12	6.0457e-11	Up	Diap2	1448.47	1.70486	0.375884	4.53561	5.74368e-06	9.27394e-05	Up
Cpt1a	4371.9	1.75319	0.286458	6.12023	9.34382e-10	1.90838e-08	Up	Cntnap4	40.7762	8.59406	2.62785	3.27038	0.00107402	0.00684842	Up	Dio2	71.9994	9.49171	2.21571	4.28382	1.83716e-05	0.000260695	Up
Cpxm2	36.0448	8.27149	2.51913	3.28348	0.00102535	0.00639792	Up	Cntnap5b	142.086	8.92741	1.99291	4.47959	7.47882e-06	8.49955e-05	Up	Diras1	187.769	10.8745	2.14541	5.06872	4.00491e-07	8.73621e-06	Up
Cr1l	1664.66	0.949123	0.286169	3.31666	0.000911014	0.0057747	Up	Cobll1	5182.72	3.08104	0.16103	19.1333	1.33369e-81	3.47664e-79	Up	Diras2	40.9238	8.67708	2.66318	3.25816	0.00112136	0.00939673	Up
Creg1	465.98	1.52426	0.574651	2.65249	0.00798998	0.0364327	Up	Col11a1	70.6762	9.38762	2.10434	4.46108	8.1546e-06	9.18139e-05	Up	Disp2	281.874	10.027	2.07341	4.83601	1.32472e-06	2.54032e-05	Up
Creg2	54.2523	3.58919	1.73084	2.07367	0.0381101	0.126936	Up	Col4a3bp	2141.96	0.563553	0.191364	2.94493	0.00323028	0.017469	Up	Dlc1	9272.33	0.439595	0.18425	2.38587	0.017039	0.0864496	Up
Creld1	815.768	1.10767	0.510682	2.16901	0.030082	0.105231	Up	Col7a1	217.88	3.15422	0.656858	4.80199	1.57096e-06	2.09917e-05	Up	Dlg2	752.397	3.10713	1.05039	2.95807	0.00309573	0.022026	Up
Crip2	1119.28	0.710382	0.312966	2.26984	0.0232172	0.0862476	Up	Col9a2	116.347	5.02089	1.38786	3.61771	0.000297217	0.00226073	Up	Dlg3	208.032	4.82094	1.74515	2.76249	0.00573629	0.0364223	Up
Crmp1	663.291	7.75593	2.57945	3.00681	0.00264001	0.0142773	Up	Col9a3	84.6814	5.26033	1.41067	3.72895	0.000192278	0.00154587	Up	Dlgap1	165.348	9.23175	2.05737	4.48716	7.21793e-06	0.000113651	Up
Crtac1	18.6294	7.31947	3.07205	2.3826	0.017191	0.0681486	Up	Commd6	388.003	1.04115	0.4654	2.23711	0.0252793	0.0923901	Up	Dlgap3	78.7852	9.62137	2.40667	3.99779	6.39367e-05	0.00079255	Up
Cs	3236.52	0.650083	0.286571	2.26849	0.0232995	0.0864475	Up	Commd7	891.813	0.71079	0.281222	2.5275	0.0114877	0.0493935	Up	Dmd	417.054	3.97274	1.27537	3.11498	0.00183959	0.0142874	Up
Csdc2	313.404	5.8607	1.54484	3.79373	0.0001484	0.00117107	Up	Coro7	583.355	0.779414	0.354505	2.1986	0.0279065	0.0999316	Up	Dmtf1	1535.26	0.679632	0.313462	2.16815	0.0301471	0.133552	Up
Csf1	1545.03	0.892776	0.260558	3.42639	0.000611655	0.00407562	Up	Cox5a	1554.47	1.29758	0.263241	4.92927	8.25374e-07	1.15507e-05	Up	Dmxl2	1277.19	1.06176	0.366968	2.89332	0.00381193	0.0262389	Up
Csnk1a1	5253.63	0.535289	0.180483	2.96586	0.00301836	0.0159706	Up	Cox6a1	1166.41	1.00392	0.292364	3.43379	0.000595198	0.00411793	Up	Dnahc6	360.487	8.8087	1.19659	7.36153	1.81814e-13	1.0486e-11	Up
Cspg5	370.432	2.23751	0.930051	2.4058	0.0161373	0.0646518	Up	Cox6c	2866.41	0.68823	0.212389	3.24042	0.00119354	0.0075017	Up	Dnajb5	671.941	1.65773	0.506749	3.27131	0.00107052	0.00904536	Up
Csrnp3	82.281	5.83365	1.99228	2.92812	0.00341018	0.0177346	Up	Cox7c	2160.65	0.740428	0.308982	2.39635	0.0165594	0.066445	Up	Dnajc10	4347.66	1.20341	0.226045	5.32377	1.01641e-07	2.53288e-06	Up
Csrp1	4197.01	0.613746	0.195549	3.13858	0.00169771	0.00981812	Up	Cpe	6815.51	4.32801	0.173275	24.9777	1.06944e-137	6.57917e-135	Up	Dnajc16	829.222	0.90341	0.417307	2.16486	0.0303985	0.13429	Up
Cst3	2135.76	1.33619	0.222228	6.01269	1.82474e-09	3.57297e-08	Up	Cpeb2	790.506	1.0255	0.397895	2.57732	0.00995703	0.0441196	Up	Dnajc18	1075.99	1.66137	0.352456	4.7137	2.43258e-06	4.3626e-05	Up
Cstf2	1358.64	1.2249	0.297909	4.11167	3.92806e-05	0.000356296	Up	Cpeb3	170.178	1.81793	0.845124	2.15108	0.0314696	0.109652	Up	Dnajc3	4181.05	0.470649	0.212505	2.21477	0.0267757	0.12265	Up
Ctcf	2900.52	0.51553	0.214106	2.40782	0.0160479	0.0643909	Up	Cplx1	291.087	6.39759	1.02921	6.21605	5.09819e-10	1.11537e-08	Up	Dnajc6	166.543	10.7014	2.09112	5.11753	3.09566e-07	6.94175e-06	Up
Cthrc1	474.884	5.02337	0.856978	5.86173	4.58076e-09	8.51876e-08	Up	Cpne6	24.5082	7.85939	2.69253	2.91896	0.003512	0.018716	Up	Dnalc1	259.978	3.41643	0.710589	4.80789	1.52533e-06	2.86724e-05	Up
Ctla2a	4190.5	1.17845	0.288942	4.0785	4.53266e-05	0.000403184	Up	Cpne9	293.641	4.35114	1.08025	4.02789	5.62797e-05	0.000520808	Up	Dner	2266.05	8.24727	1.93234	4.26803	1.9721e-05	0.000277259	Up
Ctnna2	136.082	10.1882	2.07692	4.90545	9.32148e-07	1.18272e-05	Up	Cpt1a	5947.48	0.786617	0.204945	3.83819	0.000123946	0.00105088	Up	Dnm1	515.409	5.05627	1.25745	4.02106	5.79375e-05	0.000724266	Up
Ctnnb1	21975.5	0.794617	0.127432	6.2356	4.50046e-10	9.59191e-09	Up	Cpxm2	39.9926	8.56615	2.20257	3.88915	0.000100595	0.000875089	Up	Dnm1l	2274.27	0.778487	0.297925	2.61303	0.00897435	0.0521938	Up
Ctnnbip1	1629.03	2.54467	0.281526	9.03884	1.58346e-19	7.48565e-18	Up	Cr1l	1973.77	0.707373	0.221944	3.18717	0.0014367	0.00879637	Up	Dock4	4967.12	1.0769	0.21192	5.08164	3.74186e-07	8.20945e-06	Up
Ctnnd2	236.343	9.51942	1.75209	5.43319	5.53569e-08	8.77786e-07	Up	Cr2	19.3252	7.51656	2.86184	2.62648	0.00862743	0.0393039	Up	Dock5	295.126	1.93779	0.64832	2.98894	0.00279948	0.0202014	Up
Ctps	520.687	1.50475	0.714908	2.10482	0.0353071	0.119702	Up	Creg2	58.4771	4.1572	1.42305	2.92132	0.0034855	0.018602	Up	Dock9	7059.02	0.748585	0.173134	4.32373	1.53415e-05	0.00022289	Up
Ctsc	415.431	6.35209	0.789092	8.04987	8.28792e-16	3.0379e-14	Up	Creld1	924.058	1.02432	0.378372	2.70717	0.00678602	0.0322525	Up	Dok4	6979.94	1.42303	0.216474	6.57368	4.90865e-11	2.08187e-09	Up
Ctsh	2015.28	4.51354	2.02044	2.23394	0.0254869	0.0926823	Up	Crk	5611.4	0.463649	0.186616	2.48451	0.012973	0.05453	Up	Dopey1	1285.61	0.877288	0.416717	2.10524	0.0352707	0.150219	Up
Ctsw	293.772	6.16047	0.739089	8.33523	7.73485e-17	3.07268e-15	Up	Crmp1	797.184	3.44028	1.55943	2.20611	0.0273764	0.098514	Up	Dpm2	297.042	1.44275	0.677497	2.12953	0.0332103	0.143735	Up
Ctsz	938.295	0.820941	0.325079	2.52536	0.011558	0.0495188	Up	Crtac1	20.7187	7.61762	2.5997	2.93019	0.00338753	0.0181597	Up	Dpp10	340.172	6.24578	1.75442	3.56002	0.000370828	0.00369518	Up
Cttnbp2	959.314	1.50358	0.39274	3.82843	0.000128964	0.00103533	Up	Crtap	1252.23	0.857219	0.269809	3.17713	0.00148738	0.00906337	Up	Dpp6	181.442	10.825	1.92362	5.62742	1.82921e-08	5.20591e-07	Up
Cul3	4050.57	0.393392	0.170698	2.30461	0.0211883	0.0803831	Up	Cryz	418.445	1.95546	0.418014	4.67798	2.89716e-06	3.63742e-05	Up	Dpy19l4	1121.7	1.22085	0.521829	2.33955	0.0193069	0.0951349	Up
Cutc	159.446	3.0514	1.0309	2.95994	0.00307695	0.016224	Up	Cs	3696.24	0.556334	0.225135	2.47112	0.0134691	0.056094	Up	Dpysl4	62.6594	9.29094	2.57808	3.60382	0.000313574	0.00319786	Up
Cxadr	199.652	4.71845	1.06419	4.43386	9.25602e-06	9.58118e-05	Up	Csdc2	362.116	3.9969	1.06719	3.74524	0.000180219	0.00146036	Up	Dpysl5	170.702	4.48968	1.88779	2.37828	0.0173937	0.0878686	Up
Cxcl12	8586.63	5.28415	0.80749	6.54392	5.99258e-11	1.39689e-09	Up	Csf1	1829.05	0.660355	0.321442	2.05435	0.0399416	0.13143	Up	Dram2	1064.07	1.79387	0.370725	4.8388	1.30624e-06	2.50804e-05	Up
Cxcl14	35.3478	8.24316	2.72473	3.02532	0.00248373	0.0135724	Up	Csf2ra	16.832	5.87742	2.47991	2.37002	0.0177873	0.0702164	Up	Drp2	34.8732	8.44576	2.80258	3.01357	0.00258193	0.0189002	Up
Cxcr4	482.754	4.13915	0.902186	4.58791	4.47703e-06	4.98086e-05	Up	Csnk2a1	4115.6	0.432893	0.171209	2.52845	0.0114568	0.0492881	Up	Dscam	112.019	10.1292	2.28977	4.42367	9.70395e-06	0.000148644	Up
Cxcr7	424.8	0.971718	0.473573	2.05189	0.0401808	0.13238	Up	Cspg5	373.504	3.26333	1.1853	2.75316	0.00590226	0.0288914	Up	Dst	11167.5	0.835567	0.221876	3.76592	0.000165937	0.00182687	Up
Cxx1a	1112.85	2.15784	0.468745	4.60344	4.15564e-06	4.66089e-05	Up	Csrnp3	94.3109	4.17158	1.89644	2.19969	0.0278288	0.0997709	Up	Dstn	4911.85	0.423349	0.191464	2.21111	0.0270279	0.123471	Up
Cxxc5	675.632	0.935433	0.432343	2.16364	0.0304922	0.10629	Up	Csrp2	2814.96	1.03998	0.271684	3.82789	0.000129246	0.00108742	Up	Dtna	38.9014	8.60323	2.81018	3.06145	0.0022027	0.0165703	Up
Cyb5b	2526.05	0.520626	0.220019	2.36628	0.0179677	0.0706371	Up	Cst3	2329.43	1.4535	0.184922	7.86008	3.83882e-15	1.32083e-13	Up	Dtx1	115.573	10.1742	2.22173	4.57941	4.66286e-06	7.76769e-05	Up
Cyfip2	497.694	3.57202	0.808962	4.41556	1.00751e-05	0.000103443	Up	Ctage5	984.727	0.674512	0.265667	2.53894	0.011119	0.0480637	Up	Dtx2	158.495	3.41225	1.05182	3.24415	0.00117804	0.00980152	Up
Cyhr1	504.634	0.995353	0.471082	2.11291	0.0346088	0.117907	Up	Cthrc1	697.468	1.47388	0.336078	4.38552	1.1571e-05	0.000125591	Up	Dtx4	115.182	10.1695	1.97652	5.14517	2.67272e-07	6.10118e-06	Up
Cyp2s1	34.5731	8.21121	2.98566	2.75021	0.00595564	0.0283668	Up	Ctla2b	798.332	1.32276	0.364502	3.62894	0.000284588	0.00217759	Up	Dusp11	3031.73	1.13288	0.24117	4.69746	2.63416e-06	4.66912e-05	Up
Cyp46a1	82.2545	9.46187	2.54016	3.72491	0.000195385	0.00149143	Up	Ctnna2	152.054	6.62866	1.54242	4.29757	1.72684e-05	0.000180502	Up	Dusp22	1102.92	1.55688	0.441044	3.52999	0.000415573	0.00407438	Up
Cyp4f17	25.1864	6.33735	2.46402	2.57196	0.0101125	0.0442114	Up	Ctnnb1	27134.5	0.422904	0.101084	4.18367	2.86835e-05	0.000286835	Up	Dusp27	358.193	11.8067	1.62139	7.28183	3.29329e-13	1.85717e-11	Up
Cyp4v3	264.241	1.27411	0.575511	2.21387	0.0268378	0.0967366	Up	Ctnnbip1	2026.22	1.70713	0.233923	7.2978	2.92514e-13	8.83864e-12	Up	Dync1li2	4393.35	0.592011	0.225934	2.62028	0.0087858	0.0513326	Up
Cyp51	497.625	4.38349	0.750108	5.84381	5.10191e-09	9.44165e-08	Up	Ctnnd2	270.994	4.77006	1.0151	4.69911	2.61294e-06	3.32675e-05	Up	Dynlt1f	39.9761	8.64351	2.85448	3.02806	0.00246132	0.0181834	Up
D0H4S114	8369.65	2.59938	0.153103	16.978	1.19494e-64	2.32478e-62	Up	Ctsf	56.8473	4.20145	1.82366	2.30386	0.0212305	0.0808195	Up	Dzip3	593.102	1.66326	0.641385	2.59324	0.0095077	0.0545275	Up
D14Ertd449e	281.85	3.19664	1.05968	3.01661	0.00255621	0.0138984	Up	Ctsh	2363.62	3.38149	0.261984	12.9073	4.09606e-38	3.8413e-36	Up	E130203B14Rik	44.9891	7.33543	2.63938	2.77922	0.00544896	0.0349036	Up
D17Wsu104e	493.156	1.2543	0.558927	2.24412	0.0248249	0.0907316	Up	Ctsl	5453.09	2.27684	0.163059	13.9633	2.61203e-44	2.97578e-42	Up	E130311K13Rik	57.9209	4.94269	2.22361	2.22283	0.0262276	0.120866	Up
D1Ertd622e	379.975	1.27231	0.507501	2.507	0.012176	0.0515832	Up	Ctso	875.123	0.726807	0.317237	2.29105	0.0219604	0.0829004	Up	Ebf2	86.986	22.4951	3.45824	6.5048	7.77961e-11	3.19279e-09	Up
D330022K07Rik	47.3964	8.66748	2.35172	3.68558	0.00022818	0.00170825	Up	Ctsw	358.19	3.2274	0.498092	6.47954	9.20041e-11	2.21097e-09	Up	Eci2	2412.19	0.852348	0.278887	3.05625	0.00224124	0.0168104	Up
D3Ertd254e	607.086	1.10526	0.54104	2.04284	0.0410687	0.134662	Up	Cttnbp2	1336.78	0.532381	0.246095	2.16331	0.0305173	0.107061	Up	Ecm1	967.024	1.5024	0.511996	2.93439	0.003342	0.0234819	Up
D430019H16Rik	73.0431	3.86261	1.89035	2.04332	0.0410203	0.13462	Up	Cuedc2	1000.39	1.05004	0.274195	3.82955	0.000128376	0.00108129	Up	Edar	32.0621	8.32432	2.94698	2.82469	0.00473259	0.0312347	Up
D430041D05Rik	466.041	8.01674	1.29654	6.1832	6.28131e-10	1.31113e-08	Up	Cutc	201.843	1.87873	0.628964	2.98702	0.00281708	0.0156301	Up	Edem3	3052.82	0.901144	0.230736	3.90552	9.40234e-05	0.00110497	Up
D4Bwg0951e	427.007	1.83414	0.674904	2.71763	0.00657513	0.0308133	Up	Cwc15	1415.87	0.447303	0.222137	2.01363	0.0440479	0.141402	Up	Edn3	136.917	7.94305	1.55823	5.09747	3.44231e-07	7.64032e-06	Up
D5Ertd579e	1391.07	0.72018	0.270182	2.66553	0.00768663	0.0351975	Up	Cxcl12	15488	0.597803	0.172801	3.4595	0.000541184	0.00380238	Up	Eef1a2	616.022	12.5887	3.1614	3.982	6.83367e-05	0.000839519	Up
D730039F16Rik	44.8105	8.58609	2.27452	3.77491	0.000160066	0.00125059	Up	Cxxc4	245.679	2.96404	0.558241	5.3096	1.09865e-07	1.76381e-06	Up	Efemp1	59.0856	7.7713	2.58725	3.00369	0.00266723	0.0194219	Up
D7Ertd715e	85.8653	9.52453	1.93694	4.91731	8.77435e-07	1.11797e-05	Up	Cxxc5	548.541	3.17686	0.457111	6.94988	3.65594e-12	1.00408e-10	Up	Efna3	27.9899	6.68715	2.79746	2.39043	0.0168284	0.085753	Up
D930014E17Rik	132.569	2.13968	0.976566	2.19102	0.0284502	0.100825	Up	Cyb5b	2699.53	0.676298	0.184257	3.67041	0.000242166	0.00188392	Up	Efnb3	194.304	2.24309	1.0588	2.11851	0.0341316	0.146639	Up
Dab1	225.892	9.44421	1.88653	5.00613	5.55353e-07	7.38605e-06	Up	Cyba	813.797	0.707471	0.320229	2.20926	0.0271563	0.0978825	Up	Efr3a	2155.18	0.851972	0.302462	2.81679	0.00485058	0.0318066	Up
Dach1	2677.37	10.7366	0.689331	15.5754	1.06929e-54	1.62264e-52	Up	Cyfip2	518.847	5.64703	0.753007	7.4993	6.41578e-14	2.02618e-12	Up	Efr3b	3929.82	2.31548	0.257857	8.9797	2.71506e-19	2.58372e-17	Up
Dach2	86.6098	3.80307	1.82956	2.07869	0.0376462	0.125777	Up	Cyhr1	571.674	0.923418	0.358349	2.57687	0.00997001	0.0441644	Up	Egfl8	951.066	1.78868	0.513455	3.48361	0.000494698	0.00470767	Up
Dap	681.836	1.16975	0.408606	2.86279	0.00419928	0.021234	Up	Cyp2d22	972.577	1.58845	0.271664	5.84712	5.00162e-09	9.74967e-08	Up	Egflam	1481.03	7.4472	0.852215	8.73863	2.35947e-18	2.04121e-16	Up
Dapk1	858.403	0.846257	0.397651	2.12814	0.0333253	0.114362	Up	Cyp4v3	318.514	0.918799	0.440149	2.08747	0.0368454	0.12346	Up	Egln1	2727.41	0.658396	0.247484	2.66036	0.00780573	0.0467178	Up
Dars	1879.76	0.903728	0.248349	3.63894	0.000273758	0.00200884	Up	D10Bwg1379e	149.861	9.00501	1.97862	4.55115	5.33524e-06	6.24474e-05	Up	Ei24	3551.65	0.903686	0.267654	3.37633	0.000734605	0.00657173	Up
Dbh	103.147	9.78929	2.00119	4.89173	9.99531e-07	1.26189e-05	Up	D130017N08Rik	44.4766	2.89799	1.27477	2.27334	0.023006	0.0860277	Up	Eif2c1	2541.14	0.538597	0.253208	2.12709	0.0334126	0.144323	Up
Dbpht2	26.812	7.84509	2.68638	2.92033	0.00349666	0.0181532	Up	D14Ertd449e	387.084	1.46047	0.499388	2.92451	0.00344999	0.0184323	Up	Elavl2	145.418	10.5057	2.23286	4.70503	2.53825e-06	4.52017e-05	Up
Dcaf6	1384.03	0.981993	0.315219	3.11527	0.00183775	0.0104999	Up	D330022K07Rik	53.1407	8.97762	2.09048	4.29452	1.75068e-05	0.00018244	Up	Elavl3	518.421	10.9027	1.73864	6.27083	3.59134e-10	1.34661e-08	Up
Dcbld1	2104.98	0.45219	0.220431	2.05139	0.0402289	0.132481	Up	D3Ertd254e	710.718	0.888595	0.399182	2.22604	0.0260114	0.0944641	Up	Elmod1	459.922	12.167	1.905	6.38688	1.69303e-10	6.7314e-09	Up
Dcbld2	539.656	0.942884	0.455776	2.06875	0.03857	0.128102	Up	D430041D05Rik	519.02	6.46723	1.91803	3.37182	0.000746745	0.00499562	Up	Elmod2	220.325	2.38684	0.791699	3.01483	0.00257122	0.0188311	Up
Dcdc2a	36.8983	3.58691	1.49223	2.40373	0.0162289	0.0649112	Up	D5Ertd579e	1685.59	0.422185	0.213535	1.97713	0.048027	0.150931	Up	Elovl7	345.796	2.96004	0.903372	3.27665	0.00105046	0.00891544	Up
Dck	649.334	1.24536	0.602343	2.06752	0.0386848	0.1284	Up	D730039F16Rik	51.5002	5.07778	1.36043	3.73247	0.000189608	0.0015275	Up	Eltd1	27586.4	1.09337	0.16494	6.62886	3.38282e-11	1.45911e-09	Up
Dclk1	422.002	3.71531	1.00764	3.68713	0.000226799	0.00169959	Up	D7Ertd715e	109.914	2.78914	1.08701	2.56588	0.0102916	0.0452783	Up	Eml2	417.141	3.10763	1.01455	3.06306	0.00219085	0.0164893	Up
Dctn6	1282.82	0.742598	0.329303	2.25506	0.0241296	0.0888109	Up	Dab1	266.369	3.87204	1.08633	3.56434	0.000364777	0.00270244	Up	Eml6	341.227	2.48943	0.817269	3.04603	0.00231883	0.0173071	Up
Dcx	263.686	3.30296	1.05352	3.13518	0.00171751	0.00990245	Up	Dab2	3415.55	3.23772	0.296797	10.9088	1.04578e-27	6.96282e-26	Up	En2	22.9603	7.84236	3.60907	2.17296	0.0297834	0.132371	Up
Dda1	530.556	0.872211	0.44086	1.97843	0.0478803	0.151151	Up	Dab2ip	2666.96	0.426834	0.204956	2.08256	0.0372913	0.124737	Up	Enah	1047.68	1.01965	0.384052	2.65497	0.00793148	0.0473773	Up
Ddah1	2667.16	2.95057	0.485033	6.08325	1.17773e-09	2.3766e-08	Up	Dach1	5059.59	0.525308	0.148168	3.54534	0.000392104	0.0028758	Up	Enc1	2216.81	1.42665	0.254837	5.59826	2.16514e-08	6.05999e-07	Up
Ddb1	10726.7	0.563274	0.131539	4.28217	1.85077e-05	0.000179116	Up	Dach2	92.6649	5.02431	1.48267	3.38869	0.000702268	0.00473308	Up	Eng	13977.5	0.574599	0.1962	2.92863	0.00340459	0.0238118	Up
Ddc	1126.77	2.50232	0.375828	6.65816	2.77282e-11	6.73241e-10	Up	Dagla	574.17	3.116	0.61518	5.06518	4.08006e-07	6.03379e-06	Up	Engase	223.541	2.00209	1.00982	1.98261	0.0474105	0.185762	Up
Ddi2	2100.28	1.04678	0.236279	4.43027	9.41135e-06	9.72869e-05	Up	Dap	785.32	1.02648	0.37933	2.70603	0.0068092	0.0323132	Up	Eno2	535.925	4.62018	1.45281	3.18017	0.00147186	0.0118324	Up
Ddrgk1	1377.45	0.640817	0.291626	2.19739	0.0279924	0.0998555	Up	Dapk1	970.734	0.793868	0.272519	2.91307	0.00357892	0.0189874	Up	Enpp2	3849.73	4.8485	0.54395	8.9135	4.94463e-19	4.59067e-17	Up
Ddx25	43.4306	8.54042	2.39256	3.56957	0.000357562	0.00253527	Up	Dapk2	87.0348	4.51664	1.27575	3.54039	0.000399541	0.00291921	Up	Entpd2	18.6134	7.53953	3.75704	2.00677	0.0447741	0.178277	Up
Ddx3x	12829	0.258002	0.118928	2.1694	0.0300523	0.105152	Up	Darc	29.6299	8.13414	2.29956	3.53725	0.000404312	0.00295127	Up	Epas1	36622.9	1.0596	0.205996	5.14378	2.69262e-07	6.1374e-06	Up
Decr1	388.36	1.68317	0.496357	3.39105	0.000696266	0.00455228	Up	Dbc1	316.621	2.04242	0.990919	2.06114	0.0392899	0.129757	Up	Epb4.1	1760.54	2.51274	0.453143	5.54514	2.93711e-08	8.01443e-07	Up
Def6	1042.24	5.52298	0.404138	13.6661	1.61874e-42	1.78002e-40	Up	Dbh	125.015	3.63063	1.10167	3.29556	0.000982266	0.00634758	Up	Epb4.1l1	239.596	4.53594	1.4378	3.15478	0.00160617	0.0127572	Up
Dennd5b	2190.93	0.450465	0.216856	2.07725	0.0377785	0.126153	Up	Dbpht2	30.5278	5.637	1.92609	2.92666	0.00342624	0.0183289	Up	Epha10	46.5086	8.86086	2.80654	3.15722	0.00159283	0.0126645	Up
Dgat2	22.7147	7.6054	2.88591	2.63536	0.00840482	0.0379932	Up	Dcaf11	805.49	0.653661	0.31144	2.09883	0.0358316	0.120721	Up	Epha5	160.298	10.6462	2.16582	4.91556	8.85295e-07	1.76203e-05	Up
Dgka	1194.83	1.74628	0.357669	4.88238	1.04811e-06	1.31882e-05	Up	Dcaf6	1520.32	1.04861	0.21248	4.93509	8.01142e-07	1.12423e-05	Up	Epha8	116.027	10.1799	2.34626	4.33879	1.4327e-05	0.000210156	Up
Dgkb	57.8926	8.95525	3.49761	2.56039	0.0104554	0.0455531	Up	Dcbld1	1969.86	1.14391	0.191449	5.97504	2.30028e-09	4.70456e-08	Up	Epm2aip1	2744.26	0.605588	0.251485	2.40805	0.0160381	0.0825544	Up
Dgkd	1413.26	0.863068	0.266875	3.23398	0.00122079	0.00741692	Up	Dclk1	437.779	6.86795	0.960538	7.1501	8.67136e-13	2.50217e-11	Up	Epor	170.794	2.93339	1.31752	2.22645	0.0259842	0.120108	Up
Dgkg	200.77	6.85404	1.48104	4.62786	3.69457e-06	4.16222e-05	Up	Dcn	138.082	3.83224	1.53959	2.48913	0.0128055	0.0539437	Up	Eprs	5147.65	0.572231	0.192342	2.97507	0.00292919	0.020998	Up
Dgki	138.012	4.36217	1.56347	2.79006	0.00526987	0.0256809	Up	Dctn6	1372.86	0.909788	0.260163	3.49699	0.000470547	0.00336762	Up	Erc2	250.947	11.2929	2.07229	5.44951	5.05078e-08	1.33069e-06	Up
Dhcr24	449.346	8.13829	0.843876	9.64395	5.21412e-22	2.82586e-20	Up	Dcun1d1	1046.79	0.807175	0.327319	2.46602	0.0136625	0.0567304	Up	Ercc5	786.653	1.29263	0.456676	2.83052	0.00464724	0.0307781	Up
Dhcr7	411.818	1.46657	0.504884	2.90477	0.00367519	0.018944	Up	Dcun1d4	632.571	1.0209	0.449675	2.27031	0.0231886	0.0865423	Up	Ercc6	1024.46	0.915374	0.404583	2.26251	0.0236657	0.112288	Up
Dhrs4	516.427	1.43797	0.611026	2.35338	0.0186037	0.0727231	Up	Dcx	278.394	4.51377	0.79558	5.67356	1.39859e-08	2.57301e-07	Up	Ermn	18.3885	7.52271	3.51302	2.14138	0.0322434	0.140428	Up
Dhx9	6849.46	0.364377	0.155682	2.34052	0.0192571	0.0746707	Up	Ddb1	12786.3	0.336672	0.114086	2.95105	0.00316696	0.0172052	Up	Esam	10596	0.900166	0.1876	4.79834	1.59988e-06	2.99629e-05	Up
Diap2	1167.01	2.22274	0.392671	5.66056	1.50876e-08	2.60015e-07	Up	Ddc	1082.77	6.10984	0.555627	10.9963	3.9813e-28	2.7094e-26	Up	Esrrb	70.2867	9.45685	3.60677	2.62197	0.00874234	0.0511572	Up
Dio2	62.5753	9.06757	2.0863	4.34624	1.38494e-05	0.000138175	Up	Ddi2	2745.96	0.43571	0.183857	2.36983	0.0177961	0.0702164	Up	Esrrg	348.567	2.03374	0.822394	2.47295	0.0134001	0.0719429	Up
Diras1	164.201	8.97565	1.99124	4.50757	6.55742e-06	7.01755e-05	Up	Ddrgk1	1490.67	0.750422	0.299019	2.50961	0.0120864	0.0515068	Up	Esyt1	4383.16	1.51041	0.327258	4.61536	3.92416e-06	6.68336e-05	Up
Diras2	35.4519	8.24839	2.48184	3.32349	0.000888976	0.00564444	Up	Ddx19b	808.713	0.641997	0.28568	2.24726	0.0246236	0.0906441	Up	Esyt2	5557.37	1.75366	0.177247	9.89387	4.42567e-23	4.9548e-21	Up
Dixdc1	115.431	4.09232	1.65069	2.47916	0.0131692	0.0548417	Up	Ddx25	48.491	7.37029	1.98664	3.70992	0.000207321	0.00164616	Up	Etfdh	1772.9	0.994355	0.325543	3.05445	0.00225476	0.0168864	Up
Dkc1	889.148	0.971622	0.404822	2.40012	0.0163896	0.0654225	Up	Def6	1254.2	3.31031	0.306093	10.8147	2.93197e-27	1.92708e-25	Up	Etnk1	4272.74	0.811047	0.204736	3.96143	7.4503e-05	0.00090389	Up
Dlat	787.877	0.932004	0.438136	2.1272	0.0334032	0.114427	Up	Dennd4c	2447.21	0.616961	0.182986	3.37164	0.000747234	0.00499583	Up	Ets1	21685.2	0.54095	0.126979	4.26017	2.04274e-05	0.000285347	Up
Dleu7	22.8382	6.07802	2.49304	2.43799	0.014769	0.0601988	Up	Derl1	1626.49	0.863276	0.233825	3.69197	0.000222522	0.00174969	Up	Evi5	2238.1	0.803793	0.29692	2.7071	0.0067873	0.0416371	Up
Dlg1	1914.81	0.497327	0.24559	2.02503	0.042864	0.139255	Up	Dgka	1538.88	0.998286	0.281149	3.55073	0.000384163	0.00282565	Up	Evi5l	187.28	2.2328	1.05045	2.12557	0.0335394	0.144655	Up
Dlg2	588.952	9.71368	2.37348	4.09259	4.26578e-05	0.000381268	Up	Dgkd	1696.14	0.5804	0.20707	2.80292	0.00506427	0.0253543	Up	Evl	2709.61	0.596984	0.275287	2.16859	0.0301137	0.133443	Up
Dlgap1	144.364	8.78974	1.9867	4.42429	9.67618e-06	9.95498e-05	Up	Dgkg	235.509	3.85966	0.992512	3.88878	0.000100751	0.00087595	Up	Exoc6b	3000.59	1.05927	0.248039	4.27058	1.94964e-05	0.000274609	Up
Dlgap3	68.7049	9.20208	2.29908	4.0025	6.2676e-05	0.000538871	Up	Dgki	154.931	4.16261	0.765175	5.44007	5.32602e-08	8.96216e-07	Up	Extl3	3431.91	2.23657	0.217211	10.2967	7.28903e-25	9.09695e-23	Up
Dnahc5	24.7414	7.7287	2.80591	2.75443	0.0058794	0.0280831	Up	Dhrs4	672.11	0.744149	0.330739	2.24996	0.0244518	0.0901842	Up	Eya1	18.9418	7.56544	3.47289	2.17843	0.0293743	0.131275	Up
Dnahc6	316.887	6.32355	1.2612	5.01392	5.33318e-07	7.11794e-06	Up	Diap2	1152.13	3.77332	0.394246	9.57099	1.0589e-21	5.46504e-20	Up	Ezh1	1165.58	0.94642	0.34093	2.77599	0.00550331	0.0351782	Up
Dnahc7a	73.1023	9.29248	2.04179	4.55115	5.33534e-06	5.81636e-05	Up	Dio2	74.1107	3.94457	1.64117	2.4035	0.0162388	0.0652776	Up	F5	50.479	8.97993	2.53258	3.54577	0.000391474	0.00387051	Up
Dnahc7b	59.2473	5.35968	1.78804	2.99751	0.00272192	0.0146316	Up	Diras1	181.406	9.28411	1.90562	4.87196	1.10499e-06	1.51333e-05	Up	F730043M19Rik	23.8516	5.4742	2.65894	2.05879	0.0395142	0.162562	Up
Dnaja1	8555.17	0.546188	0.143187	3.81449	0.000136462	0.0010899	Up	Diras2	40.4513	5.60172	1.75177	3.19775	0.00138505	0.00852474	Up	Fabp3	73.9886	3.02413	1.48658	2.03428	0.0419234	0.169767	Up
Dnajb3	15.2866	5.61018	2.79459	2.00752	0.0446948	0.143424	Up	Dirc2	795.473	1.28786	0.298923	4.30833	1.6449e-05	0.000173041	Up	Fabp7	1083.92	10.3938	1.09344	9.50562	1.98858e-21	2.03209e-19	Up
Dnajc10	4228.26	0.718982	0.213535	3.36705	0.000759765	0.00491451	Up	Disp1	159.567	1.49645	0.634582	2.35817	0.0183655	0.0719908	Up	Faim	1263.73	1.74729	0.374591	4.66452	3.09334e-06	5.40129e-05	Up
Dnajc16	679.878	1.15366	0.455043	2.53527	0.0112361	0.0483297	Up	Dixdc1	155.087	1.84647	0.743532	2.48338	0.0130141	0.05467	Up	Faim2	53.8515	7.60324	2.28417	3.32867	0.000872629	0.00760106	Up
Dnajc18	1130.9	0.751674	0.3306	2.27367	0.0229859	0.0856792	Up	Dlat	929.68	0.698153	0.351993	1.98343	0.0473192	0.149431	Up	Fam101b	13150.9	0.730091	0.14783	4.93871	7.86416e-07	1.58806e-05	Up
Dnajc19	179.368	2.18538	1.01303	2.15728	0.030984	0.107667	Up	Dleu7	25.0815	7.89387	2.42633	3.25342	0.00114026	0.0072051	Up	Fam102b	2357.52	1.11096	0.268656	4.13524	3.5458e-05	0.000467432	Up
Dnajc6	145.245	10.2822	2.02915	5.06726	4.03582e-07	5.5424e-06	Up	Dlg2	659.822	6.07643	1.61789	3.75578	0.000172804	0.0014069	Up	Fam107a	206.236	3.18138	0.928027	3.42811	0.000607792	0.00561101	Up
Dner	1972.11	12.516	2.80036	4.46943	7.84271e-06	8.2419e-05	Up	Dlg3	246.789	1.87652	0.905302	2.07281	0.03819	0.127186	Up	Fam108a	713.29	0.908942	0.427946	2.12397	0.0336731	0.14516	Up
Dnm1	440.311	6.91125	2.85194	2.42335	0.0153782	0.0621641	Up	Dlgap1	164.197	5.00773	1.66313	3.01103	0.00260365	0.01462	Up	Fam108c	1620.01	1.8674	0.656186	2.84584	0.00442947	0.0296976	Up
Dnm1l	1976.31	0.776805	0.26815	2.89691	0.0037686	0.0193531	Up	Dlgap3	76.9475	6.38942	1.73163	3.68983	0.000224403	0.00176267	Up	Fam115c	691.812	1.07052	0.472817	2.26413	0.0235659	0.11185	Up
Dnm3	845.716	3.0847	0.452525	6.81665	9.31911e-12	2.36484e-10	Up	Dlx6as1	13.1348	6.96127	3.10336	2.24314	0.024888	0.0913332	Up	Fam118a	1109.65	2.70153	0.402106	6.71845	1.83673e-11	8.20119e-10	Up
Doc2b	65.0249	9.1228	2.93879	3.10427	0.00190746	0.0108007	Up	Dmd	477.64	1.94459	0.430579	4.51622	6.29547e-06	7.2311e-05	Up	Fam122a	219.423	1.97362	0.761067	2.59322	0.00950812	0.0545275	Up
Dock11	490.871	1.54038	0.52011	2.96165	0.00305999	0.0161514	Up	Dmrta2	13.8837	7.0394	3.54411	1.98622	0.0470085	0.148733	Up	Fam123a	26.5594	8.05249	3.58937	2.24343	0.0248691	0.11651	Up
Dock3	238.136	5.15562	1.55747	3.31025	0.000932122	0.00588637	Up	Dmxl2	1107.84	1.62016	0.252641	6.41291	1.42772e-10	3.35241e-09	Up	Fam123c	40.517	8.66191	3.2736	2.64599	0.00814522	0.0484639	Up
Dock4	3758.56	1.80921	0.184802	9.79002	1.24273e-22	6.93325e-21	Up	Dnahc6	363.161	4.49539	0.877119	5.12517	2.97266e-07	4.46917e-06	Up	Fam124b	596.36	4.74148	1.07529	4.40948	1.03617e-05	0.000158084	Up
Dock5	279.156	1.42031	0.562513	2.52494	0.0115719	0.0495493	Up	Dnahc7a	87.4147	3.87652	1.67806	2.31013	0.0208812	0.0797696	Up	Fam125b	2235.41	1.42698	0.327165	4.36165	1.29083e-05	0.000191561	Up
Dock9	5435.75	1.26852	0.19455	6.52027	7.01797e-11	1.62592e-09	Up	Dnaja2	3025.66	0.356041	0.158735	2.24299	0.0248973	0.0913455	Up	Fam129a	2623.86	6.50754	2.9131	2.23389	0.0254904	0.118436	Up
Dok4	4881.82	3.22514	0.201826	15.9798	1.76673e-57	2.91415e-55	Up	Dnaja4	324.023	1.46499	0.465615	3.14636	0.00165318	0.00992455	Up	Fam13a	842.021	4.55646	0.7377	6.17658	6.55048e-10	2.3558e-08	Up
Dpf1	36.3823	8.28552	2.42844	3.41187	0.000645193	0.00427173	Up	Dnajb12	757.467	0.637102	0.321918	1.97908	0.0478066	0.150484	Up	Fam160b1	1934.04	0.812165	0.287443	2.82548	0.00472097	0.0311943	Up
Dph2	54.8234	3.54929	1.30723	2.71513	0.00662501	0.0310005	Up	Dnajb5	655.23	1.60702	0.425133	3.78005	0.000156797	0.00129236	Up	Fam171b	133.619	2.7156	1.03585	2.6216	0.00875178	0.0511927	Up
Dpm2	227.269	2.28731	0.732529	3.12248	0.00179335	0.0102734	Up	Dnajc1	1506.56	0.628349	0.257636	2.4389	0.0147319	0.0602758	Up	Fam184a	60.4088	6.13769	2.25468	2.7222	0.00648493	0.0400722	Up
Dpp6	158.05	10.4041	1.86585	5.57608	2.45992e-08	4.09313e-07	Up	Dnajc10	4513.34	0.893788	0.143928	6.20995	5.30004e-10	1.15624e-08	Up	Fam185a	87.2081	9.76812	2.12145	4.60445	4.1355e-06	6.99634e-05	Up
Dpy19l1	1200.65	0.913501	0.351519	2.59873	0.00935702	0.0415427	Up	Dnajc16	704.266	1.52847	0.400902	3.81258	0.000137526	0.0011492	Up	Fam189a2	452.76	1.97079	0.612576	3.21721	0.00129443	0.0106063	Up
Dpy19l4	1092.04	0.728368	0.31141	2.33894	0.0193388	0.0748829	Up	Dnajc18	1296.52	0.647116	0.236994	2.73052	0.0063234	0.0305446	Up	Fam19a2	42.7602	8.73966	3.23913	2.69816	0.00697249	0.0425163	Up
Dpysl4	54.654	8.87195	2.45322	3.61646	0.000298663	0.00216541	Up	Dnajc28	141.062	1.4346	0.663451	2.16233	0.0305931	0.107205	Up	Fam19a3	83.6863	3.76187	1.71605	2.19217	0.0283671	0.127786	Up
Dpysl5	142.533	10.255	2.02642	5.06066	4.17813e-07	5.71714e-06	Up	Dnajc3	3740.13	0.759294	0.168438	4.50787	6.54832e-06	7.49912e-05	Up	Fam19a5	55.4508	9.1147	2.48157	3.67296	0.000239756	0.00251935	Up
Dram2	1155.19	0.711003	0.305523	2.32716	0.0199565	0.0767461	Up	Dnajc5	2625.48	0.352413	0.172818	2.03922	0.0414279	0.135049	Up	Fam20b	1578.28	0.932073	0.299062	3.11665	0.00182917	0.0142422	Up
Drosha	2049.74	0.572607	0.258831	2.21228	0.0269472	0.0970163	Up	Dnajc6	165.97	4.9334	1.61817	3.04875	0.00229796	0.0131244	Up	Fam20c	467.72	2.71408	0.544446	4.98503	6.19506e-07	1.28685e-05	Up
Drp2	30.5974	6.61712	2.30855	2.86635	0.00415238	0.0210347	Up	Dner	2177.57	14.3335	3.78493	3.78699	0.000152484	0.00126086	Up	Fam40a	1354.72	1.48223	0.321825	4.60571	4.11062e-06	6.96199e-05	Up
Dscam	97.7192	9.71038	2.2073	4.3992	1.0865e-05	0.000110507	Up	Dnlz	419.79	0.889137	0.412815	2.15384	0.031253	0.109119	Up	Fam55b	64.8112	7.90218	2.09622	3.76972	0.000163432	0.0018045	Up
Dsp	287.578	4.42068	0.666573	6.63196	3.31253e-11	7.97899e-10	Up	Dnm1	515.248	3.88221	1.07732	3.6036	0.000313844	0.00237195	Up	Fam57a	791.542	1.45107	0.508987	2.85089	0.00435968	0.029307	Up
Dst	9719.55	0.827189	0.194023	4.26335	2.01388e-05	0.000193055	Up	Dnm1l	2185.48	0.804336	0.260618	3.08626	0.0020269	0.0117814	Up	Fam57b	303.338	3.64205	1.71125	2.1283	0.0333119	0.144052	Up
Dtna	33.8963	8.18272	2.63221	3.10869	0.00187917	0.0106683	Up	Dnm3	916.882	3.47991	0.386008	9.01512	1.96647e-19	8.81759e-18	Up	Fam59b	32.6602	6.91073	2.54318	2.71735	0.00658067	0.0405821	Up
Dtx1	100.788	9.75499	2.14043	4.55748	5.17704e-06	5.68052e-05	Up	Dnmt3b	691.978	0.961106	0.33071	2.90619	0.00365854	0.0193229	Up	Fam5b	55.2966	9.1106	2.59627	3.50911	0.000449614	0.00435485	Up
Dtx4	107.083	3.86401	1.77288	2.17951	0.029294	0.102997	Up	Dock3	264.705	4.97499	0.88577	5.61656	1.94793e-08	3.47151e-07	Up	Fam5c	47.3014	8.88533	3.28465	2.70511	0.00682823	0.0418377	Up
Dusp11	2892.32	0.734993	0.246619	2.98028	0.00287989	0.0153503	Up	Dock4	4866.14	1.02383	0.142337	7.19305	6.33585e-13	1.85257e-11	Up	Fam63b	3686.09	0.654079	0.219582	2.97875	0.00289428	0.0208153	Up
Dusp16	818.392	1.22913	0.419345	2.93108	0.00337784	0.0176147	Up	Dock5	337.834	1.02406	0.434763	2.35544	0.0185009	0.0723476	Up	Fam73b	221.317	2.97467	0.986454	3.01552	0.00256541	0.0188064	Up
Dusp18	127.703	1.91009	0.850499	2.24584	0.024714	0.0904571	Up	Dok4	6225.9	1.91711	0.169649	11.3004	1.30579e-29	9.42865e-28	Up	Fam76a	1405.03	0.885324	0.359219	2.46458	0.0137175	0.0732082	Up
Dusp2	542.155	1.26139	0.441123	2.8595	0.00424313	0.0214274	Up	Dpf1	44.7969	3.26902	1.19215	2.74213	0.00610427	0.0297006	Up	Fam78a	418.416	1.73055	0.577539	2.99641	0.00273178	0.0197972	Up
Dusp26	18.9388	7.34278	3.23376	2.27066	0.0231675	0.0861091	Up	Dpm2	291.144	1.37055	0.592884	2.31166	0.0207963	0.0795045	Up	Fam78b	174.62	4.23079	1.88547	2.24389	0.0248395	0.116443	Up
Dusp27	311.058	9.9334	1.53263	6.48129	9.09439e-11	2.07842e-09	Up	Dpp10	323.758	11.5838	3.51527	3.29527	0.000983259	0.00635133	Up	Fam82b	164.412	3.09688	1.09159	2.83703	0.00455358	0.0303293	Up
Dusp6	4384.45	0.529863	0.168801	3.13898	0.00169537	0.00980835	Up	Dpp6	188.712	3.69262	0.889666	4.15057	3.31644e-05	0.000325299	Up	Far2	757.944	4.69111	0.990811	4.73462	2.1947e-06	3.9829e-05	Up
Dusp8	360.743	2.89555	0.737986	3.92359	8.72402e-05	0.000729405	Up	Dpp8	5257.53	0.561139	0.211088	2.65831	0.00785328	0.0363653	Up	Farsb	732.833	0.981686	0.477547	2.05568	0.0398129	0.163306	Up
Dync1i1	108.461	8.39017	1.79158	4.6831	2.82562e-06	3.25827e-05	Up	Dpp9	993.3	0.613588	0.272157	2.25454	0.0241622	0.0893518	Up	Fat1	1461.42	0.762905	0.34124	2.23569	0.0253724	0.118056	Up
Dync1li2	3699.83	0.706399	0.214878	3.28743	0.00101105	0.00631647	Up	Dpy19l1	1399.69	0.731628	0.296012	2.47162	0.0134503	0.0560363	Up	Fbll1	21.7432	7.76444	3.29852	2.35392	0.0185767	0.0925551	Up
Dynlt1a	33.052	8.14756	2.7432	2.9701	0.00297707	0.0157796	Up	Dpy19l4	1076.5	1.26378	0.27539	4.58905	4.45271e-06	5.32111e-05	Up	Fbxl16	113.823	10.1522	2.12221	4.7838	1.72013e-06	3.20179e-05	Up
Dynlt1f	34.5435	8.21123	2.68604	3.057	0.00223561	0.0123815	Up	Dpysl5	183.716	2.60027	1.1028	2.35789	0.0183789	0.071999	Up	Fbxo9	544.015	1.78755	0.638737	2.79856	0.00513305	0.0333543	Up
Dzip1	68.0943	5.35846	1.39985	3.82788	0.00012925	0.00103629	Up	Dscam	109.611	6.1462	1.66595	3.68931	0.00022486	0.00176536	Up	Fbxw11	3635.8	0.862954	0.270187	3.19391	0.00140359	0.0113495	Up
Dzip1l	21.371	7.51814	2.93018	2.56576	0.0102951	0.0449448	Up	Dsp	443.851	1.14659	0.561408	2.04235	0.0411166	0.134262	Up	Fcgrt	2077.19	1.4631	0.343755	4.25624	2.07895e-05	0.000289872	Up
Dzip3	592.307	0.964276	0.417716	2.30845	0.0209742	0.0797193	Up	Dstn	4510.88	0.607352	0.175777	3.45525	0.000549778	0.00385747	Up	Fcho1	26.0657	8.02541	3.33002	2.41002	0.0159516	0.0821369	Up
E030010A14Rik	527.985	2.52744	0.60715	4.16279	3.14382e-05	0.000290015	Up	Dtx1	119.702	3.76851	1.19774	3.14635	0.00165323	0.00992455	Up	Fez1	85.5197	9.73972	2.34188	4.15893	3.19744e-05	0.000428936	Up
E030011O05Rik	54.2088	8.86017	2.34183	3.78343	0.00015468	0.00121431	Up	Dtx4	143.014	1.81512	0.749504	2.42176	0.0154456	0.0626625	Up	Fgd3	37.4761	8.54929	3.03329	2.81849	0.00482505	0.0316665	Up
E330009J07Rik	178.994	9.12489	1.65786	5.50402	3.71233e-08	6.03154e-07	Up	Dusp11	3529.9	0.412172	0.162124	2.54233	0.0110117	0.0477341	Up	Fgf12	68.2025	9.41325	2.49556	3.772	0.000161947	0.00179201	Up
Ears2	17.3375	7.21565	3.17232	2.27457	0.022932	0.0855257	Up	Dusp2	484.297	2.89915	0.442256	6.55537	5.55037e-11	1.37242e-09	Up	Fgf13	184.566	1.68068	0.840764	1.99899	0.0456094	0.180752	Up
Ebf1	675.966	6.90735	0.958713	7.20482	5.81195e-13	1.63934e-11	Up	Dusp22	997.348	1.99515	0.350122	5.69843	1.20916e-08	2.2379e-07	Up	Fgf7	114.532	8.72782	2.33611	3.73605	0.000186933	0.0020258	Up
Ebf2	75.9569	9.34709	3.32804	2.80859	0.00497597	0.0244689	Up	Dusp27	353.428	5.71971	0.554215	10.3204	5.69994e-25	3.45138e-23	Up	Fgfbp1	240.301	7.47778	1.08275	6.90629	4.97485e-12	2.4356e-10	Up
Ebf3	199.392	5.06976	1.52083	3.33355	0.000857444	0.00546252	Up	Dync1i1	138.22	2.73132	1.22617	2.22752	0.0259125	0.0941494	Up	Fhad1	16.7534	7.38841	3.64153	2.02893	0.0424651	0.171172	Up
Echdc1	673.47	0.85332	0.386315	2.20887	0.0271837	0.0976223	Up	Dynlrb1	2598.22	0.443044	0.220002	2.01382	0.0440283	0.141374	Up	Fkrp	622.605	0.93591	0.46124	2.02912	0.0424464	0.171157	Up
Echs1	504.858	0.877001	0.439517	1.99538	0.046002	0.146841	Up	Dynlt1f	38.8063	8.52422	2.37335	3.59164	0.000328597	0.00247131	Up	Fli1	6070.85	0.768767	0.212681	3.61465	0.000300757	0.00308788	Up
Eci2	1933.32	1.2005	0.233708	5.13676	2.79518e-07	3.9568e-06	Up	Dynlt3	2802.69	0.74366	0.23662	3.14285	0.00167313	0.0100361	Up	Flnb	9952.64	0.520217	0.183635	2.83289	0.00461299	0.0306045	Up
Ecm1	908.005	1.10291	0.421316	2.61777	0.00885053	0.0396653	Up	E030010A14Rik	673.044	1.55426	0.313713	4.95439	7.25564e-07	1.0266e-05	Up	Flt1	22538.8	1.19792	0.161384	7.4228	1.14672e-13	6.76741e-12	Up
Ecscr	1035.15	0.929693	0.405831	2.29084	0.0219727	0.082903	Up	E030011O05Rik	60.3008	7.72659	1.99476	3.87344	0.000107311	0.000924102	Up	Fmn2	103.425	10.014	2.19994	4.55194	5.31542e-06	8.65589e-05	Up
Edar	27.9201	7.90295	2.74381	2.88028	0.00397322	0.0202463	Up	E130114P18Rik	14.8183	7.13545	3.06346	2.32921	0.0198479	0.0764299	Up	Fn1	62994.2	3.96724	0.266534	14.8846	4.15072e-50	1.17035e-47	Up
Edem3	3017.5	0.418278	0.205092	2.03947	0.0414035	0.13544	Up	E330009J07Rik	217.656	3.37639	0.655035	5.15452	2.54287e-07	3.84556e-06	Up	Fn3krp	228.222	1.90661	0.908974	2.09754	0.035946	0.152234	Up
Edn3	118.499	9.98879	1.81259	5.5108	3.57217e-08	5.81627e-07	Up	Ebf1	830.734	3.1159	0.445575	6.99298	2.69107e-12	7.52522e-11	Up	Fndc1	3203.61	6.47892	0.364998	17.7505	1.70712e-70	8.38469e-68	Up
Eef1a2	537.489	12.1702	3.16833	3.84122	0.000122422	0.000989223	Up	Ebf3	229.932	3.83543	0.722225	5.31058	1.09278e-07	1.75621e-06	Up	Fndc5	173.256	6.97236	1.48013	4.71063	2.46957e-06	4.41853e-05	Up
Eepd1	117.655	2.31701	1.00335	2.30927	0.0209285	0.0796165	Up	Echdc1	667.537	1.3895	0.312509	4.44627	8.73739e-06	9.7874e-05	Up	Foxc1	1620.73	3.64842	0.310363	11.7553	6.63075e-32	1.08559e-29	Up
Efemp1	51.3494	8.782	2.69941	3.2533	0.00114072	0.00699974	Up	Eci2	2116.68	1.29142	0.194299	6.64656	3.00014e-11	7.57672e-10	Up	Foxf1a	49.9878	7.52783	2.42102	3.10936	0.00187492	0.0144985	Up
Efna4	47.1584	8.65914	2.42558	3.56993	0.000357079	0.00253446	Up	Ecm1	1027.52	1.04568	0.343154	3.04727	0.00230928	0.0131836	Up	Foxf2	1538.81	9.89803	0.758494	13.0496	6.38966e-39	1.23151e-36	Up
Efnb3	141.234	6.65052	1.53523	4.33194	1.47802e-05	0.000146021	Up	Eda2r	39.5221	8.55024	2.15411	3.96926	7.20955e-05	0.000646171	Up	Foxl2	197.991	10.9513	1.74649	6.27047	3.59958e-10	1.34661e-08	Up
Efr3a	1992.11	0.610417	0.225528	2.70661	0.00679743	0.0316705	Up	Edar	30.9637	8.19692	2.37664	3.44895	0.000562777	0.0039254	Up	Foxl2os	287.512	10.0515	1.69636	5.92536	3.1162e-09	1.001e-07	Up
Efr3b	2890.04	5.83475	1.29586	4.50262	6.7122e-06	7.16803e-05	Up	Edem3	3084.71	0.730065	0.193512	3.77271	0.000161483	0.00132742	Up	Foxp2	281.163	2.75387	0.988718	2.78529	0.005348	0.0344307	Up
Egfl8	648.283	6.21233	0.83963	7.39889	1.3733e-13	4.1267e-12	Up	Edn3	139.086	4.19979	0.96576	4.34869	1.36953e-05	0.000146579	Up	Foxq1	2663.7	9.68465	0.546921	17.7076	3.66485e-70	1.74378e-67	Up
Egflam	1302.83	5.61102	0.533473	10.5179	7.1455e-26	4.67383e-24	Up	Eef1a2	597.039	7.67022	2.64598	2.89882	0.0037457	0.0196886	Up	Frem1	1263.16	2.8496	0.670926	4.24726	2.16403e-05	0.000300361	Up
Egfr	78.6305	5.27739	1.43528	3.67692	0.000236068	0.00175777	Up	Eef1b2	5349.87	0.366803	0.152602	2.40366	0.0162319	0.0652774	Up	Frem2	1240.22	2.18835	0.480053	4.55856	5.15058e-06	8.45984e-05	Up
Egln1	2270.75	0.816895	0.232397	3.51508	0.000439625	0.00304373	Up	Efhd1	35.9809	6.93467	2.04196	3.39608	0.000683578	0.00463351	Up	Frmd4b	4617.85	1.07009	0.226576	4.72288	2.32523e-06	4.20475e-05	Up
Ehd2	1710.24	1.81567	0.361895	5.01712	5.24532e-07	7.01301e-06	Up	Efr3a	2221.69	0.609825	0.179248	3.40212	0.000668649	0.00455036	Up	Frmd5	95.6887	9.90183	2.27284	4.35658	1.32108e-05	0.000194967	Up
Ei24	3366.82	0.566834	0.206549	2.74431	0.00606385	0.028828	Up	Efr3b	3543.52	3.07501	0.162399	18.9349	5.87957e-80	1.45851e-77	Up	Frmd6	1706.15	2.08354	0.293084	7.10901	1.16877e-12	6.26608e-11	Up
Eid2b	194.034	1.67742	0.72853	2.30247	0.0213087	0.0807189	Up	Egfl8	828.058	2.65072	0.343163	7.72437	1.12412e-14	3.73505e-13	Up	Frmpd4	81.0989	8.23037	2.6452	3.11143	0.00186183	0.0144147	Up
Eif2c1	2099.78	0.720213	0.234823	3.06705	0.0021618	0.012021	Up	Egflam	1819.32	1.85852	0.260879	7.12406	1.04791e-12	3.00688e-11	Up	Fry	4041.49	3.00216	0.312505	9.60675	7.48761e-22	7.80866e-20	Up
Eif3g	902.996	0.747147	0.332563	2.24663	0.0246635	0.0902941	Up	Egln1	2221.22	1.41853	0.251327	5.64417	1.65978e-08	3.00676e-07	Up	Frzb	487.393	4.05763	0.54352	7.46547	8.30051e-14	4.97573e-12	Up
Eif3h	3970.06	0.433836	0.204644	2.11995	0.0340099	0.116186	Up	Ei24	3584.1	0.735745	0.170663	4.31109	1.6245e-05	0.000171247	Up	Fscn1	8593.22	0.696226	0.226151	3.07859	0.00207982	0.0157784	Up
Eif4a1	8626.09	0.580637	0.13418	4.32731	1.50938e-05	0.000149023	Up	Eid2b	234.251	1.2338	0.596845	2.0672	0.0387152	0.128304	Up	Fstl5	61.1434	7.81841	2.21024	3.53736	0.000404155	0.00397267	Up
Eif4g2	17210.9	0.48223	0.152621	3.15967	0.0015795	0.00922374	Up	Eif1a	845.293	0.712496	0.338205	2.1067	0.0351436	0.11895	Up	Fth1	27712.5	3.17657	0.189143	16.7946	2.67376e-63	1.16316e-60	Up
Eif5a	6657.24	0.486829	0.241083	2.01934	0.0434517	0.140833	Up	Eif2b2	793.011	0.991615	0.291589	3.40073	0.000672059	0.00456097	Up	Fuz	90.1386	9.81592	2.07524	4.73003	2.24488e-06	4.06912e-05	Up
Elavl2	126.883	10.0872	2.16517	4.65886	3.17967e-06	3.62793e-05	Up	Eif2s2	3364.45	0.782233	0.240597	3.25121	0.00114914	0.00725525	Up	Fxyd7	33.3736	8.38201	3.26212	2.5695	0.0101846	0.0575829	Up
Elavl3	453.522	7.92743	1.08987	7.27377	3.49587e-13	1.01628e-11	Up	Eif3h	4613.73	0.297245	0.136679	2.17476	0.0296481	0.104561	Up	Fyco1	4058.26	1.57916	0.285864	5.52416	3.31063e-08	8.98531e-07	Up
Elavl4	89.35	2.92807	1.28149	2.2849	0.022319	0.083772	Up	Eif3m	3264.95	0.406363	0.165194	2.45992	0.0138968	0.0575168	Up	Fzd1	761.948	1.14147	0.480655	2.37481	0.0175579	0.0884698	Up
Elfn2	40.6727	6.93019	2.32253	2.98389	0.00284606	0.0152074	Up	Eif4e2	3193.45	0.391928	0.195692	2.00278	0.045201	0.14429	Up	Fzd3	570.092	1.47006	0.522842	2.81168	0.00492834	0.0322332	Up
Elmo1	1253.83	4.10413	0.376553	10.8992	1.16275e-27	8.02031e-26	Up	Eif4g3	7122.84	0.290446	0.121415	2.39217	0.016749	0.0670308	Up	Fzd6	7004.76	2.62096	0.195167	13.4293	4.07374e-41	8.73617e-39	Up
Elmod1	401.252	11.7485	3.09468	3.79636	0.000146835	0.00116114	Up	Eif5a	7347.86	0.524462	0.176922	2.96437	0.00303301	0.0165944	Up	Gab1	3418.71	1.10862	0.219388	5.05323	4.34395e-07	9.28946e-06	Up
Elovl4	103.232	9.78964	1.92358	5.08927	3.59444e-07	4.97679e-06	Up	Elavl3	500.947	9.17127	1.18324	7.75097	9.11938e-15	3.05569e-13	Up	Gabarapl1	3777.21	0.934789	0.236198	3.95765	7.56922e-05	0.000916129	Up
Elovl7	304.522	2.80406	0.935131	2.99858	0.00271244	0.014591	Up	Elavl4	87.4829	9.69546	1.9268	5.03188	4.85686e-07	7.05369e-06	Up	Gabbr1	2484.46	1.57523	0.721445	2.18344	0.0290036	0.129903	Up
Eltd1	26094.2	0.734633	0.135112	5.43722	5.41176e-08	8.59932e-07	Up	Elfn2	44.6237	8.7241	2.26791	3.84676	0.00011969	0.00102042	Up	Gabbr2	548.153	9.42494	1.45655	6.47072	9.75357e-11	3.96021e-09	Up
Emid2	42.6577	8.51463	3.723	2.28703	0.022194	0.083468	Up	Ell2	285.657	1.64016	0.572144	2.86669	0.00414783	0.0214577	Up	Gabra1	620.771	12.5997	4.15399	3.03315	0.00242015	0.0179315	Up
Eml2	424.275	1.70826	0.638268	2.67641	0.00744163	0.0342403	Up	Elmod1	443.609	12.0382	3.08195	3.90603	9.38265e-05	0.000820094	Up	Gabra3	105.378	5.22686	1.26902	4.11883	3.80805e-05	0.000497268	Up
Eml5	205.484	2.84944	0.956548	2.97888	0.00289303	0.0154095	Up	Elovl2	43.2614	5.54231	1.79227	3.09233	0.0019859	0.011565	Up	Gabra4	16.4598	7.36229	3.73649	1.97038	0.0487951	0.189626	Up
Enah	702.148	2.70991	0.371692	7.29075	3.0824e-13	9.04747e-12	Up	Elovl7	301.957	5.70411	0.620178	9.19753	3.66263e-20	1.744e-18	Up	Gabrb2	612.636	10.1369	1.6944	5.98256	2.19652e-09	7.19231e-08	Up
Enc1	2079.88	1.04956	0.221727	4.73356	2.2062e-06	2.61148e-05	Up	Eltd1	22192.7	2.18105	0.127909	17.0516	3.40042e-65	6.226e-63	Up	Gabrb3	147.646	10.5276	2.15635	4.88215	1.04935e-06	2.04315e-05	Up
Endod1	651.102	3.85483	0.497505	7.74833	9.31111e-15	3.0986e-13	Up	Emid2	47.0909	8.80212	3.3228	2.649	0.00807297	0.0371743	Up	Gabrg1	35.6717	8.4781	3.25018	2.6085	0.00909391	0.0527281	Up
Eno2	455.792	6.14501	2.97574	2.06504	0.0389196	0.129094	Up	Eml2	445.275	2.11029	0.475857	4.43473	9.21896e-06	0.000102686	Up	Gabrg2	391.202	8.53579	1.78927	4.77056	1.83716e-06	3.40714e-05	Up
Enpp2	3241.73	8.02529	0.327896	24.4751	2.72031e-132	1.29002e-129	Up	Eml5	250.48	1.99784	0.675534	2.95743	0.00310216	0.0169009	Up	Gad1	1064.66	4.2769	1.02947	4.15447	3.26047e-05	0.000435473	Up
Enpp3	134.258	8.69827	1.81205	4.80023	1.58482e-06	1.93325e-05	Up	Eml6	400.627	1.2115	0.612146	1.97911	0.0478038	0.150484	Up	Gad2	361.337	9.40635	1.70604	5.51355	3.51658e-08	9.51039e-07	Up
Epas1	36778	0.48893	0.168607	2.89983	0.00373368	0.0192063	Up	En2	22.1387	7.71268	2.98054	2.58768	0.00966243	0.043	Up	Galnt13	86.0623	5.26794	2.11468	2.49113	0.0127337	0.0690221	Up
Epb4.1l4b	21.85	7.54906	3.22586	2.34017	0.0192749	0.0747119	Up	Enah	976.592	1.19074	0.293019	4.06372	4.82976e-05	0.00045349	Up	Galnt9	39.3805	8.62098	4.11845	2.09326	0.0363262	0.153257	Up
Epb4.1l5	125.144	10.0674	1.8511	5.43859	5.37028e-08	8.5513e-07	Up	Enc1	2667.36	0.503368	0.244313	2.06034	0.0393659	0.12998	Up	Galntl1	103.176	10.0105	2.38797	4.19206	2.76431e-05	0.00037647	Up
Epdr1	87.8341	2.77986	1.31603	2.11232	0.0346592	0.11798	Up	Endod1	1093.78	0.705711	0.332566	2.12202	0.0338364	0.115722	Up	Galntl6	23.1248	7.8527	3.8257	2.05262	0.0401094	0.164168	Up
Epha4	1171.09	2.08136	0.644053	3.23166	0.00123074	0.00746464	Up	Eng	14236.7	0.399558	0.169827	2.35274	0.0186355	0.0727815	Up	Gap43	221.608	6.00682	1.4576	4.12104	3.7717e-05	0.000493062	Up
Epha5	140.121	8.81556	2.00072	4.40619	1.05205e-05	0.000107507	Up	Engase	188.698	3.50037	0.766178	4.56861	4.90962e-06	5.79509e-05	Up	Gapvd1	5026.53	0.646394	0.213596	3.02625	0.0024761	0.0182837	Up
Epha6	23.8907	7.67797	3.4849	2.20321	0.0275798	0.0987199	Up	Eno1	1291.24	3.13123	1.57645	1.98626	0.0470044	0.148733	Up	Garnl3	79.2648	4.3973	1.33412	3.29603	0.000980621	0.00839288	Up
Epha8	101.247	9.76157	2.26623	4.3074	1.65185e-05	0.000161721	Up	Eno2	507.186	5.54403	1.84067	3.01197	0.00259558	0.014584	Up	Gas2l3	2313.96	1.33385	0.458884	2.90672	0.00365237	0.0252662	Up
Ephb1	79.2888	3.22816	1.51082	2.1367	0.0326225	0.11243	Up	Enpp2	4097.67	2.85771	0.179668	15.9055	5.80411e-57	9.2028e-55	Up	Gatad1	1738.8	0.666237	0.320843	2.07652	0.0378457	0.157313	Up
Ephb6	19.3202	7.37157	3.65035	2.01942	0.043444	0.140833	Up	Enpp3	175.26	2.57821	0.948011	2.7196	0.00653616	0.0314046	Up	Gatm	2403.73	2.23379	0.403148	5.54089	3.00946e-08	8.1825e-07	Up
Epm2aip1	1927.97	1.5518	0.268778	5.77354	7.76229e-09	1.40397e-07	Up	Entpd5	694.062	1.38501	0.387623	3.57307	0.000352815	0.00262652	Up	Gbe1	1013.07	1.38304	0.449883	3.07421	0.00211057	0.015972	Up
Epn2	1957.63	0.977912	0.234513	4.16997	3.04635e-05	0.000282052	Up	Entpd6	145.261	1.40228	0.689208	2.03463	0.0418884	0.136043	Up	Gcc2	2312.44	1.01894	0.330175	3.08607	0.0020282	0.0155261	Up
Eprs	4456.55	0.582901	0.184844	3.15347	0.0016134	0.00938777	Up	Epb4.1l1	260.097	2.53586	0.759253	3.33993	0.000837984	0.00551078	Up	Gclc	627.534	1.24681	0.628838	1.98272	0.0473986	0.185762	Up
Eps8	107.047	4.34184	0.987602	4.39634	1.10091e-05	0.000111836	Up	Epb4.1l3	410.254	3.46005	1.04891	3.29873	0.000971247	0.00628694	Up	Gdap1	209.967	4.95791	2.2589	2.19483	0.0281755	0.127337	Up
Eps8l2	107.244	3.78491	1.89353	1.99887	0.0456228	0.145753	Up	Epha5	159.793	4.901	1.22011	4.01685	5.89802e-05	0.000541885	Up	Gdap10	323.933	2.88816	1.35807	2.12666	0.033448	0.144436	Up
Erbb4	30.5339	8.0327	2.57236	3.12269	0.00179206	0.0102698	Up	Epha6	26.3772	7.96559	3.11603	2.55633	0.0105783	0.0462594	Up	Gdap1l1	18.419	7.52437	3.79665	1.98185	0.0474966	0.185956	Up
Erc2	234.648	3.79745	1.37999	2.75179	0.00592702	0.0282582	Up	Epha7	230.348	2.54623	0.983707	2.5884	0.00964226	0.0429476	Up	Gde1	565.264	1.0823	0.479463	2.25731	0.0239885	0.113537	Up
Ercc5	738.042	0.932992	0.43848	2.12779	0.0333546	0.114411	Up	Epha8	111.897	10.0507	2.1059	4.77263	1.81832e-06	2.39638e-05	Up	Gfap	277.117	11.4361	1.97638	5.78636	7.1928e-09	2.19035e-07	Up
Ercc6	923.972	0.764657	0.368492	2.0751	0.0379774	0.126605	Up	Epm2aip1	2343.6	1.11256	0.250579	4.43997	8.99699e-06	0.000100416	Up	Gfra2	303.466	3.01634	1.10702	2.72474	0.00643513	0.0398784	Up
Ergic1	926.878	0.834551	0.369605	2.25795	0.0239486	0.0883373	Up	Epn2	2172.97	0.997444	0.182606	5.46227	4.70073e-08	7.95349e-07	Up	Gga3	362.23	1.61493	0.685799	2.35481	0.0185321	0.0924042	Up
Eri1	809.188	1.02143	0.471448	2.16659	0.0302665	0.105633	Up	Epor	169.456	2.64906	0.840366	3.15226	0.0016201	0.00975232	Up	Ggnbp1	45.0964	8.81694	2.54772	3.46072	0.000538738	0.0050666	Up
Esam	9483.27	0.777516	0.174858	4.44657	8.72527e-06	9.08758e-05	Up	Eprs	5259.95	0.383979	0.168786	2.27495	0.0229088	0.0857686	Up	Git2	2964.37	0.872099	0.255006	3.41992	0.0006264	0.00575936	Up
Espn	20.5404	7.46129	3.09598	2.40999	0.0159528	0.0640435	Up	Eps8	127.378	3.02823	0.829579	3.65032	0.000261916	0.00202121	Up	Gja1	2904.97	0.672234	0.306504	2.19323	0.0282909	0.12758	Up
Esrrg	276.238	2.8974	0.740393	3.91332	9.10349e-05	0.000756168	Up	Ergic1	1072.7	0.683857	0.323492	2.11398	0.0345169	0.117381	Up	Gkn3	29.2361	6.75047	2.77396	2.43352	0.0149529	0.0782114	Up
Esyt1	3485.98	2.06764	0.208879	9.89874	4.21535e-23	2.41388e-21	Up	Erlec1	998.31	0.62933	0.26935	2.33648	0.0194664	0.0752057	Up	Glcci1	884.801	1.96922	0.428644	4.59406	4.34706e-06	7.2975e-05	Up
Esyt2	5150.9	1.37959	0.18924	7.29017	3.09571e-13	9.06899e-12	Up	Erlin2	1790.38	0.718083	0.203498	3.5287	0.000417602	0.00303102	Up	Glce	791.642	1.40625	0.68743	2.04567	0.0407891	0.166235	Up
Etfdh	1423.21	1.36335	0.266428	5.11712	3.1023e-07	4.35097e-06	Up	Esam	11757.7	0.394317	0.100952	3.90597	9.38469e-05	0.000820094	Up	Gli2	25.4166	7.98995	3.15176	2.53507	0.0112425	0.0625649	Up
Etnk1	3507.88	1.04204	0.28041	3.71614	0.000202291	0.00153642	Up	Esrrb	67.7533	9.32703	3.12406	2.98555	0.00283071	0.0156944	Up	Glra2	21.3003	7.73408	3.59274	2.1527	0.0313426	0.137414	Up
Etv4	33.8925	8.18347	2.51339	3.25596	0.00113012	0.00694593	Up	Esrrg	295.405	3.45775	0.601843	5.74527	9.17737e-09	1.72975e-07	Up	Glrb	306.044	10.1433	1.85099	5.47993	4.25505e-08	1.13463e-06	Up
Etv6	1563.83	1.00119	0.430884	2.32357	0.0201487	0.0773285	Up	Esyt1	4814.93	0.908621	0.195958	4.63682	3.53816e-06	4.32911e-05	Up	Glt25d1	2768.85	0.769953	0.231379	3.32767	0.000875758	0.00762395	Up
Evl	1850.46	1.69928	0.30964	5.48793	4.06681e-08	6.55136e-07	Up	Esyt2	5421.59	1.70426	0.132511	12.8613	7.43231e-38	6.84484e-36	Up	Glt25d2	1346.6	1.11544	0.472848	2.35897	0.0183255	0.0917058	Up
Exoc6b	2714.52	0.884303	0.339982	2.60103	0.00929441	0.041313	Up	Etf1	3270.34	0.504557	0.174386	2.89333	0.00381184	0.019968	Up	Gltp	2998.01	1.22022	0.265273	4.59988	4.22744e-06	7.12024e-05	Up
Extl3	2542.85	4.8396	0.291793	16.5857	8.84047e-62	1.59707e-59	Up	Etfdh	1629.76	1.22865	0.208753	5.88566	3.96475e-09	7.84786e-08	Up	Glul	13910	1.21273	0.158123	7.66957	1.72571e-14	1.09028e-12	Up
F2rl1	19.9725	4.9261	2.15149	2.28962	0.0220436	0.083067	Up	Etnk1	3460.23	1.67349	0.186908	8.95354	3.44259e-19	1.51711e-17	Up	Glyatl3	19.4556	7.60364	3.48564	2.18142	0.0291525	0.130475	Up
F730043M19Rik	20.2149	7.43792	2.9919	2.48602	0.0129182	0.0540186	Up	Ets1	23130	0.218798	0.10215	2.14193	0.032199	0.111637	Up	Gm10565	17.8198	7.47784	3.65272	2.04719	0.040639	0.16578	Up
Fabp3	57.3358	8.94121	2.19687	4.06998	4.70176e-05	0.00041676	Up	Evi5	2385.85	0.447493	0.219842	2.03552	0.0417981	0.135988	Up	Gm10825	33.2083	5.95623	2.36426	2.51928	0.0117596	0.0647563	Up
Fabp7	943.425	11.5346	1.5369	7.50512	6.13726e-14	1.90456e-12	Up	Exoc2	1515.51	0.78793	0.221259	3.56113	0.000369266	0.00273142	Up	Gm12070	144.104	5.1652	1.65007	3.13028	0.00174637	0.0136711	Up
Fahd2a	152.26	10.3509	1.72905	5.98644	2.1448e-09	4.16739e-08	Up	Exoc3l	1951.78	0.630514	0.284818	2.21374	0.0268465	0.0970841	Up	Gm12942	20.5317	7.68199	3.39583	2.26219	0.0236859	0.112315	Up
Faim	1060.2	1.97505	0.418929	4.71453	2.42265e-06	2.83452e-05	Up	Exoc5	3222.51	0.85784	0.186493	4.59986	4.22772e-06	5.07332e-05	Up	Gm13238	39.2395	8.61616	2.66937	3.22779	0.00124753	0.0102911	Up
Faim2	46.9205	7.23506	2.15413	3.3587	0.000783108	0.005044	Up	Exoc6b	2841.3	1.15696	0.191204	6.05091	1.44033e-09	3.03872e-08	Up	Gm13247	23.0838	7.85101	3.25138	2.41467	0.0157495	0.0813227	Up
Fam101b	7604.68	3.87442	0.289636	13.3769	8.25453e-41	8.57962e-39	Up	Extl3	3640.76	1.60557	0.186771	8.59648	8.22011e-18	3.35346e-16	Up	Gm13298	255.094	11.3171	1.71424	6.6018	4.06184e-11	1.73724e-09	Up
Fam102b	2142.67	0.912319	0.277371	3.28917	0.00100483	0.00628539	Up	Eya1	18.9571	4.91951	2.24238	2.19388	0.0282443	0.10097	Up	Gm13308	23.6976	7.88825	3.23484	2.43853	0.0147471	0.0774005	Up
Fam107a	183.57	2.85019	0.702831	4.05531	5.00688e-05	0.00044174	Up	Fa2h	22.3442	7.72638	3.8947	1.98382	0.0472759	0.149364	Up	Gm13315	21.5544	7.75127	3.44979	2.24688	0.0246475	0.115813	Up
Fam108a	584.643	1.16145	0.590042	1.96843	0.0490191	0.153786	Up	Fabp3	69.188	3.51317	1.75949	1.9967	0.0458582	0.146025	Up	Gm13845	19.4201	7.60164	3.45731	2.19871	0.0278983	0.126411	Up
Fam108c	1270.99	2.70786	0.375695	7.20759	5.69509e-13	1.61237e-11	Up	Fabp7	1064.97	5.79998	0.581621	9.9721	2.01917e-23	1.12927e-21	Up	Gm1987	1399.57	13.7727	1.4917	9.2329	2.63411e-20	2.63861e-18	Up
Fam115a	1709.21	1.21133	0.359717	3.36746	0.00075863	0.00491289	Up	Fahd2a	217.693	1.83374	0.648844	2.82617	0.00471088	0.023849	Up	Gm20605	218.421	11.0927	1.75082	6.33575	2.36197e-10	9.08164e-09	Up
Fam115c	530.634	1.7138	0.476841	3.59408	0.000325546	0.00233246	Up	Faim	1173.61	2.02761	0.313149	6.47488	9.48848e-11	2.27664e-09	Up	Gm2a	795.034	2.76527	0.564858	4.8955	9.80538e-07	1.93077e-05	Up
Fam118a	960.682	2.72552	0.474067	5.74923	8.96505e-09	1.60241e-07	Up	Faim2	55.7328	3.70431	1.55427	2.38332	0.0171575	0.0682748	Up	Gm3893	256.967	11.3277	1.74618	6.48711	8.74971e-11	3.57166e-09	Up
Fam123c	35.3757	8.24438	3.12104	2.64155	0.00825272	0.0374619	Up	Fam101b	9042.95	2.85124	0.144071	19.7905	3.59545e-87	9.7014e-85	Up	Gm5083	58.323	9.18763	3.75303	2.44805	0.014363	0.0758816	Up
Fam124b	498.814	10.6185	1.49225	7.11573	1.11324e-12	3.09404e-11	Up	Fam102b	2184.69	1.31803	0.187702	7.02189	2.18889e-12	6.14327e-11	Up	Gm5124	29.8092	8.21908	3.11484	2.63868	0.00832291	0.0493284	Up
Fam125b	1672.96	2.45385	0.293074	8.37279	5.62695e-17	2.26496e-15	Up	Fam107a	215.789	2.3197	0.581559	3.98876	6.6419e-05	0.000600543	Up	Gm5506	4344.23	1.61238	0.325331	4.9561	7.19211e-07	1.46204e-05	Up
Fam129a	2374.39	4.2073	0.52441	8.02292	1.03262e-15	3.73984e-14	Up	Fam108c	1845.92	1.00465	0.311079	3.22957	0.00123975	0.00775409	Up	Gm5567	229.359	7.73675	1.68503	4.59147	4.40126e-06	7.38035e-05	Up
Fam134b	142.298	8.79264	1.67101	5.26188	1.4259e-07	2.12345e-06	Up	Fam115c	555.221	2.1634	0.44006	4.91615	8.82636e-07	1.22628e-05	Up	Gm6639	58.6735	9.197	2.46247	3.73487	0.000187812	0.00203243	Up
Fam134c	1656.06	0.86113	0.298161	2.88814	0.00387532	0.019814	Up	Fam118a	1179.59	1.90537	0.24468	7.78718	6.85194e-15	2.31103e-13	Up	Gm694	115.793	10.1776	1.96596	5.1769	2.25606e-07	5.22842e-06	Up
Fam13a	707.909	6.54611	0.597109	10.963	5.75489e-28	4.00599e-26	Up	Fam123a	25.6051	7.92266	3.01739	2.62566	0.00864802	0.039386	Up	Gm7334	501.304	1.25526	0.631549	1.98759	0.0468568	0.184183	Up
Fam13c	570.636	10.8129	1.48974	7.25826	3.92107e-13	1.12907e-11	Up	Fam123c	39.0596	8.53208	2.82167	3.02377	0.00249648	0.0141213	Up	Gm88	44.3654	8.79295	3.9993	2.19862	0.0279049	0.126411	Up
Fam149a	206.571	3.77501	1.4049	2.68704	0.00720892	0.0333319	Up	Fam125b	2228.54	1.27402	0.274348	4.64379	3.42078e-06	4.19216e-05	Up	Gm8817	24.4293	7.93301	3.32143	2.38844	0.0169203	0.0861014	Up
Fam149b	479.226	1.06045	0.432615	2.45126	0.0142356	0.0586136	Up	Fam129a	2676.04	3.93647	0.187817	20.9591	1.5499e-97	5.54358e-95	Up	Gm962	54.507	4.98108	1.68629	2.95387	0.00313818	0.0223072	Up
Fam155a	106.863	3.94307	1.89098	2.0852	0.0370513	0.124198	Up	Fam131a	165.541	1.87565	0.732331	2.56121	0.0104308	0.0457446	Up	Gm9833	50.8457	8.98967	3.87052	2.3226	0.0202006	0.0984866	Up
Fam160b1	1725.42	0.704493	0.337729	2.08597	0.0369811	0.124094	Up	Fam134b	178.631	2.97912	0.678267	4.39226	1.12179e-05	0.000122016	Up	Gmfb	3248.38	0.539474	0.257099	2.09831	0.0358776	0.15208	Up
Fam171b	100.892	9.75659	1.913	5.10016	3.39366e-07	4.73335e-06	Up	Fam134c	2035.65	0.497305	0.239132	2.07963	0.0375594	0.12547	Up	Gmpr	787.761	1.65565	0.543648	3.04544	0.00232339	0.0173327	Up
Fam184a	52.2317	7.394	2.32038	3.18655	0.00143981	0.00850159	Up	Fam13a	935.02	2.3561	0.349945	6.73278	1.66455e-11	4.29542e-10	Up	Gnai1	347.454	1.74588	0.662642	2.63473	0.00842048	0.0497517	Up
Fam184b	224.22	9.42736	1.97235	4.77977	1.75495e-06	2.12371e-05	Up	Fam155a	113.684	5.37423	1.54714	3.47366	0.000513409	0.00363045	Up	Gnai2	25319.3	0.54991	0.162635	3.38125	0.000721574	0.00647037	Up
Fam190a	130.262	8.66335	1.68979	5.12689	2.9457e-07	4.14282e-06	Up	Fam160b1	1774.34	1.03728	0.223085	4.64972	3.32387e-06	4.09584e-05	Up	Gnal	534.724	1.92787	0.823582	2.34084	0.0192403	0.0949606	Up
Fam19a2	37.3345	8.32214	3.09154	2.69191	0.00710447	0.032879	Up	Fam163b	16.6816	4.89519	2.31109	2.11813	0.0341636	0.116479	Up	Gnao1	776.096	4.97947	1.16062	4.29033	1.78404e-05	0.000253868	Up
Fam19a5	49.3875	5.39982	1.91562	2.81884	0.00481982	0.0238321	Up	Fam171a2	1068.89	0.650254	0.27347	2.37779	0.0174167	0.0690207	Up	Gnaz	105.573	10.0437	2.12983	4.71572	2.40854e-06	4.32969e-05	Up
Fam203a	60.9099	4.84656	1.48632	3.26077	0.00111111	0.00684573	Up	Fam171b	133.973	2.35781	0.897252	2.62781	0.00859358	0.039231	Up	Gnb4	2829.32	1.19513	0.234516	5.09614	3.46648e-07	7.68277e-06	Up
Fam20c	358.281	5.90084	1.18976	4.95968	7.06105e-07	9.16608e-06	Up	Fam174a	345.757	0.967603	0.454239	2.13016	0.0331583	0.113986	Up	Gnb5	157.635	2.04359	1.04039	1.96426	0.0495	0.191266	Up
Fam38b	721.234	1.38213	0.491321	2.8131	0.00490671	0.0241751	Up	Fam184b	260.149	4.27737	1.33513	3.20372	0.00135663	0.00837948	Up	Gng4	38.1484	7.13585	2.43883	2.92593	0.00343426	0.0239862	Up
Fam40b	384.444	4.67997	1.47593	3.17085	0.00151992	0.00893635	Up	Fam189a2	515.283	1.0767	0.468623	2.29759	0.0215853	0.0818294	Up	Gnptg	178.988	3.60932	0.99426	3.63015	0.000283253	0.00292592	Up
Fam49b	963.634	0.83126	0.369044	2.25247	0.0242927	0.0892593	Up	Fam19a2	41.5334	7.12352	2.59096	2.74938	0.0059709	0.0291902	Up	Golga7b	34.1464	8.41521	4.27394	1.96896	0.0489581	0.190065	Up
Fam53c	1153.56	1.07258	0.389752	2.75195	0.00592421	0.0282582	Up	Fam19a5	53.5515	8.98734	2.07636	4.32841	1.5019e-05	0.000159636	Up	Golim4	6960.63	1.69024	0.338325	4.99589	5.85644e-07	1.22151e-05	Up
Fam57a	724.403	1.18287	0.384456	3.07674	0.00209277	0.0117058	Up	Fam20c	400.599	5.64358	0.85376	6.61026	3.83636e-11	9.64105e-10	Up	Golm1	3960.44	1.23059	0.308077	3.99444	6.48487e-05	0.000802101	Up
Fam57b	262.956	3.63754	1.06773	3.40678	0.000657329	0.00433506	Up	Fam40a	1580.6	0.650821	0.220879	2.94651	0.00321387	0.0173986	Up	Gpam	475.09	4.11662	0.981499	4.19422	2.73816e-05	0.000373242	Up
Fam59b	28.1917	7.91704	2.69071	2.94236	0.00325719	0.017034	Up	Fam40b	449.984	3.3213	0.976443	3.40143	0.000670342	0.00455711	Up	Gpcpd1	6989.18	3.70468	0.219363	16.8884	5.4778e-64	2.45309e-61	Up
Fam5b	48.2107	8.69096	2.45751	3.53649	0.000405476	0.00283553	Up	Fam43a	4913.2	1.06159	0.170546	6.22467	4.82565e-10	1.06026e-08	Up	Gpd2	4968.47	1.96703	0.37642	5.22563	1.73566e-07	4.09725e-06	Up
Fam63b	3243.69	0.602004	0.235205	2.55948	0.0104827	0.0456066	Up	Fam45a	407.542	1.94152	0.424352	4.57526	4.75622e-06	5.64434e-05	Up	Gpm6b	1093.23	3.5003	0.736191	4.7546	1.98837e-06	3.63779e-05	Up
Fam65a	5138.04	0.601401	0.242269	2.48237	0.0130512	0.0544696	Up	Fam53c	1391.05	0.755319	0.331178	2.28071	0.0225657	0.0847317	Up	Gpr123	50.0722	8.96748	2.57242	3.48601	0.000490287	0.00467153	Up
Fam69a	292.21	4.07003	0.830934	4.89814	9.67472e-07	1.22345e-05	Up	Fam57a	830.392	1.05773	0.422418	2.50399	0.0122801	0.0521303	Up	Gpr124	4005.04	1.48982	0.234033	6.36585	1.94211e-10	7.64095e-09	Up
Fam73a	617.035	1.41039	0.403154	3.49839	0.000468082	0.00322138	Up	Fam57b	295.174	3.55489	0.549094	6.47411	9.53733e-11	2.2848e-09	Up	Gpr135	31.7678	8.31118	2.89734	2.86856	0.00412351	0.0279789	Up
Fam81a	42.4444	8.50773	2.31203	3.67977	0.000233445	0.00173994	Up	Fam5b	53.3593	8.98206	2.20386	4.07561	4.58936e-05	0.000432767	Up	Gpr143	26.2441	8.03607	3.09397	2.59734	0.00939497	0.0541028	Up
Fam84b	954.609	1.79658	0.334535	5.37038	7.85705e-08	1.21169e-06	Up	Fam5c	45.598	8.75548	2.86501	3.056	0.00224308	0.0128678	Up	Gpr155	605.887	4.76522	1.06802	4.46175	8.12927e-06	0.000126302	Up
Fam98c	56.9992	2.9682	1.36059	2.18156	0.0291419	0.102629	Up	Fam63a	1947.31	0.555593	0.262196	2.119	0.0340903	0.116303	Up	Gpr26	52.3404	9.03137	2.56591	3.51975	0.00043195	0.00421055	Up
Far2	636.195	7.78175	2.05633	3.78428	0.000154151	0.00121079	Up	Fam63b	2899.29	1.60486	0.197823	8.11262	4.95397e-16	1.80123e-14	Up	Gpr31c	26.6128	8.05636	3.12075	2.58155	0.00983581	0.0560312	Up
Farsb	580.498	1.41435	0.518442	2.72809	0.00637031	0.0300309	Up	Fam69a	443.784	1.15657	0.513551	2.2521	0.0243157	0.0898332	Up	Gpr37l1	72.3351	8.0627	2.32836	3.46283	0.000534532	0.00503638	Up
Fasn	936.553	2.14264	0.537712	3.98473	6.75567e-05	0.000577237	Up	Fam69b	148.711	3.57051	0.901528	3.96051	7.47885e-05	0.000667584	Up	Gpr4	2258.36	1.02667	0.297693	3.44877	0.000563145	0.00526363	Up
Fat1	854.874	3.82694	0.446512	8.57075	1.02817e-17	4.38272e-16	Up	Fam69c	27.8701	8.04526	3.69823	2.17544	0.0295975	0.10443	Up	Gpr61	26.3497	8.04114	3.19119	2.5198	0.0117423	0.0646847	Up
Fat3	128.495	2.1434	0.852368	2.51464	0.0119153	0.0506908	Up	Fam70a	271.536	2.50068	1.19805	2.0873	0.0368613	0.123487	Up	Gpr63	117.228	10.1948	2.25933	4.51229	6.41321e-06	0.000102356	Up
Fbln1	315.273	8.92427	1.2287	7.26319	3.78072e-13	1.09281e-11	Up	Fam73a	751.627	0.985532	0.315721	3.12153	0.00179912	0.0106343	Up	Gpr68	18.3135	7.51708	3.55204	2.11627	0.0343217	0.147331	Up
Fbxl15	18.1203	7.28016	3.11763	2.33516	0.0195353	0.0754513	Up	Fam76a	1465.05	0.600257	0.259949	2.30913	0.0209362	0.0798807	Up	Gpr85	311.298	11.6042	1.64187	7.06767	1.57559e-12	8.21573e-11	Up
Fbxl16	100.912	5.8805	1.45285	4.04757	5.17531e-05	0.000455278	Up	Fam82b	165.076	2.66594	0.717851	3.71378	0.000204189	0.00162717	Up	Gprasp1	1749.15	1.34321	0.575281	2.33488	0.0195499	0.0959904	Up
Fbxl2	66.7322	7.67837	1.9101	4.01988	5.82289e-05	0.00050442	Up	Fam96a	619.214	0.781176	0.377774	2.06784	0.038655	0.128173	Up	Gprasp2	196.277	6.6207	1.51832	4.36054	1.29741e-05	0.000192163	Up
Fbxo21	481.194	1.24105	0.570317	2.17607	0.02955	0.103633	Up	Far2	722.114	5.47221	1.87795	2.91393	0.00356912	0.0189548	Up	Gprin1	92.3982	5.85399	1.80399	3.24502	0.00117443	0.00977683	Up
Fbxo9	530.393	1.16581	0.556931	2.09328	0.0363246	0.122277	Up	Fbll1	21.3582	6.16485	2.29181	2.68995	0.00714624	0.0335805	Up	Grap	3447.79	1.8205	0.237302	7.67167	1.69776e-14	1.07709e-12	Up
Fbxw11	3059.96	0.990926	0.19747	5.01812	5.21796e-07	6.99695e-06	Up	Fbln1	436.675	2.04578	0.464206	4.40705	1.04788e-05	0.000114953	Up	Grb14	671.702	3.30968	0.45318	7.30324	2.80927e-13	1.59604e-11	Up
Fbxw7	1118.34	1.07011	0.309959	3.45243	0.000555566	0.00373867	Up	Fbxl16	120.731	3.34496	1.51428	2.20894	0.0271787	0.09794	Up	Grb7	132.774	3.07708	1.11953	2.74855	0.00598595	0.0376776	Up
Fdft1	605.106	0.913263	0.398186	2.29356	0.021816	0.0823936	Up	Fbxl17	2140.32	0.711598	0.197432	3.60426	0.000313038	0.00236702	Up	Grcc10	1623.99	0.745097	0.330886	2.25182	0.0243335	0.114813	Up
Fdps	424.86	2.22085	0.483772	4.5907	4.41767e-06	4.91842e-05	Up	Fbxl2	86.6426	2.57038	1.23346	2.08388	0.0371713	0.124417	Up	Grem2	26.9232	8.0721	3.33523	2.42025	0.0155096	0.0803808	Up
Fdx1l	102.509	2.553	0.952569	2.68012	0.00735959	0.0339149	Up	Fbxo10	490.282	0.841308	0.398206	2.11274	0.0346226	0.117616	Up	Gria1	745.006	2.67898	0.945077	2.83467	0.00458733	0.0305008	Up
Fem1b	2773.13	0.577707	0.209034	2.7637	0.00571507	0.0274276	Up	Fbxo18	2116.09	0.497038	0.209535	2.3721	0.0176874	0.0698772	Up	Gria2	980.7	6.34317	2.87607	2.2055	0.0274192	0.124759	Up
Fgd3	32.7002	8.13082	2.86348	2.83949	0.00451859	0.0225855	Up	Fbxo22	943.109	0.613115	0.308967	1.9844	0.0472111	0.149251	Up	Grid1	34.3956	8.4257	4.26577	1.97519	0.0482465	0.18807	Up
Fgf12	59.4781	8.994	2.37664	3.78434	0.000154117	0.00121079	Up	Fbxo41	47.4121	5.67475	1.85412	3.06062	0.00220876	0.0126994	Up	Grid2	504.218	12.2997	3.4884	3.52589	0.000422063	0.00413003	Up
Fgfbp1	207.188	10.7953	1.66514	6.48311	8.98482e-11	2.05648e-09	Up	Fbxo44	62.4638	5.64833	1.85917	3.0381	0.00238074	0.0135464	Up	Grik1	109.591	10.0976	2.23413	4.51969	6.19316e-06	9.94695e-05	Up
Fgfr1	578.568	1.51413	0.508531	2.97746	0.00290651	0.0154596	Up	Fbxo8	390.737	1.07738	0.540795	1.99222	0.0463464	0.147121	Up	Grik2	56.2575	9.13582	2.37708	3.8433	0.000121391	0.00138657	Up
Fgfr1op2	1632.47	0.58692	0.258482	2.27064	0.0231686	0.0861091	Up	Fbxw11	3720.88	0.647747	0.186117	3.48033	0.000500805	0.0035544	Up	Grik4	51.9172	7.58342	2.5286	2.99905	0.00270819	0.0196544	Up
Fgfr4	42.9414	8.52402	2.44049	3.49275	0.00047808	0.00328572	Up	Fcgrt	1748.53	2.43108	0.227218	10.6993	1.02557e-26	6.65537e-25	Up	Grin1	448.861	10.6976	1.96305	5.44949	5.05147e-08	1.33069e-06	Up
Fhad1	14.5302	6.96136	3.35132	2.0772	0.0377835	0.126153	Up	Fez1	82.5185	9.61115	2.0499	4.68859	2.75088e-06	3.48505e-05	Up	Grin2b	28.5701	4.31042	1.95936	2.19991	0.0278131	0.126149	Up
Fhod3	61.9898	7.56422	2.00143	3.77941	0.000157202	0.00123021	Up	Fgd2	11.7081	6.79474	3.15812	2.15151	0.0314358	0.109626	Up	Grk5	1038.06	0.880885	0.417201	2.11142	0.0347365	0.1484	Up
Fkbp10	1852.66	1.29596	0.246434	5.25883	1.44971e-07	2.15469e-06	Up	Fgd3	36.1434	8.41997	2.54826	3.3042	0.000952479	0.00617325	Up	Grm1	1104.96	5.88571	1.1764	5.00315	5.64017e-07	1.18288e-05	Up
Fkbp1b	30.7372	3.80779	1.75893	2.16483	0.030401	0.106054	Up	Fgf14	33.8766	8.32688	3.54381	2.3497	0.0187888	0.0732129	Up	Grm3	55.5952	9.1185	2.45165	3.71934	0.000199748	0.00213729	Up
Fkbp3	697.149	1.57304	0.515341	3.05243	0.00226999	0.012549	Up	Fgf7	123.321	3.06444	1.50596	2.03487	0.0418641	0.136043	Up	Grm5	153.508	10.5838	2.19801	4.81517	1.47077e-06	2.78727e-05	Up
Fkbp4	1189.2	1.47284	0.374555	3.93224	8.41583e-05	0.000706752	Up	Fgfbp1	231.475	11.1002	1.58929	6.98436	2.8616e-12	7.97309e-11	Up	Grm7	38.0093	8.56971	2.89245	2.96278	0.0030487	0.0217728	Up
Fli1	5184.8	0.830893	0.17865	4.65095	3.30417e-06	3.75305e-05	Up	Fgfbp3	123.985	2.27047	0.792871	2.8636	0.00418852	0.0216173	Up	Grp	30.0932	8.23285	3.02271	2.72367	0.0064561	0.0399758	Up
Flna	9642.7	0.635623	0.171798	3.69982	0.000215753	0.001628	Up	Fgfr1	736.781	0.873074	0.411629	2.12102	0.03392	0.115957	Up	Grsf1	1758.95	0.620513	0.287187	2.16066	0.0307215	0.135388	Up
Flnc	154.866	3.3832	1.70777	1.98106	0.0475841	0.150681	Up	Fhod3	71.2204	4.62686	1.64976	2.80456	0.00503855	0.0252749	Up	Gsg1l	319.448	11.6411	1.88184	6.18604	6.16934e-10	2.24416e-08	Up
Flrt2	3655.95	0.776489	0.175936	4.41349	1.0172e-05	0.000104227	Up	Fkbp3	901.427	0.852564	0.374561	2.27617	0.022836	0.0855794	Up	Gsta4	445.368	4.12309	1.40056	2.9439	0.00324109	0.0228997	Up
Flt1	20456	0.99411	0.138996	7.1521	8.54601e-13	2.39272e-11	Up	Fkbp9	3511.54	0.555167	0.241258	2.30113	0.0213841	0.0811989	Up	Gstm1	1056.88	0.985201	0.398822	2.47028	0.0135008	0.0722794	Up
Fmn2	90.4209	8.18158	1.98833	4.11481	3.87505e-05	0.000352119	Up	Fkrp	609.626	0.887013	0.34495	2.57142	0.0101281	0.0447232	Up	Gstm7	412.086	3.741	0.818596	4.57003	4.87666e-06	8.08845e-05	Up
Fmnl3	3769.15	0.62025	0.190768	3.25133	0.00114866	0.00703007	Up	Fli1	6074.46	0.643409	0.159199	4.04155	5.31e-05	0.000493461	Up	Gtf2i	9297.27	0.351524	0.162507	2.16313	0.0305313	0.134745	Up
Fmod	40.699	8.4468	3.76181	2.24541	0.0247418	0.0905015	Up	Flrt2	2763.21	3.7631	0.207787	18.1103	2.64135e-73	5.34526e-71	Up	Gucy1b3	262.857	3.08092	1.43624	2.14512	0.0319434	0.139641	Up
Fn1	51808.1	6.81198	0.201313	33.8378	5.48943e-251	6.94184e-248	Up	Flt1	19631.8	1.77665	0.126091	14.0902	4.36374e-45	5.16264e-43	Up	H2-T22	23.2442	7.86017	3.36484	2.33597	0.0194926	0.09574	Up
Fndc1	2926.78	3.92924	0.309006	12.7157	4.83643e-37	4.6159e-35	Up	Flt3	28.3507	8.06993	3.68372	2.1907	0.0284734	0.101535	Up	Hadh	1586.55	1.34025	0.336265	3.98568	6.7286e-05	0.000828793	Up
Fndc4	150.252	3.10466	0.970738	3.19824	0.00138267	0.00822504	Up	Flt4	4325.09	0.687449	0.184646	3.72306	0.000196824	0.00157911	Up	Hapln3	141.852	7.42453	1.31324	5.65358	1.57137e-08	4.55728e-07	Up
Fndc5	149.929	10.328	2.05223	5.03259	4.83886e-07	6.52946e-06	Up	Fmn2	103.557	4.75239	1.65776	2.86676	0.00414693	0.0214577	Up	Hapln4	124.352	10.2799	2.20897	4.6537	3.26027e-06	5.66031e-05	Up
Fntb	189.77	2.31151	0.770955	2.99824	0.0027154	0.0146018	Up	Fmnl2	1900.53	1.13939	0.222812	5.11371	3.15896e-07	4.73076e-06	Up	Hbb-b1	3758.62	8.32623	2.67172	3.11643	0.00183055	0.0142422	Up
Foxc1	1346.71	4.87903	1.94252	2.5117	0.012015	0.0510007	Up	Fn1	66916.8	2.58116	0.155961	16.5501	1.59964e-61	2.73361e-59	Up	Hcn1	260.692	11.3479	1.98736	5.71003	1.12959e-08	3.34612e-07	Up
Foxf1a	43.3547	8.53778	2.51965	3.38848	0.000702814	0.00458916	Up	Fndc1	3592.84	2.5502	0.265281	9.6132	7.0326e-22	3.67896e-20	Up	Hcn2	163.324	10.6735	1.8091	5.89991	3.63701e-09	1.1489e-07	Up
Foxf2	1333.05	12.0478	1.44601	8.33177	7.96427e-17	3.14734e-15	Up	Fnta	1503.66	0.549825	0.233882	2.35087	0.0187297	0.0730384	Up	Hectd1	9730.68	0.892473	0.150402	5.93393	2.9577e-09	9.56136e-08	Up
Foxk1	1782.76	0.686563	0.25711	2.67031	0.00757812	0.0347426	Up	Foxc1	1517.21	4.5028	0.25927	17.3672	1.46162e-67	2.74143e-65	Up	Hecw1	152.847	7.12394	1.62785	4.37629	1.20714e-05	0.000181082	Up
Foxl2	171.816	10.525	1.68798	6.23529	4.50946e-10	9.59763e-09	Up	Foxf2	1539.25	4.88688	0.325239	15.0255	4.99981e-51	6.74535e-49	Up	Hepacam	65.2914	9.35031	2.54759	3.67025	0.000242311	0.00254357	Up
Foxl2os	249.435	8.56557	1.34188	6.38325	1.73364e-10	3.87451e-09	Up	Foxl2	198.815	4.75203	1.38736	3.42523	0.000614269	0.00422705	Up	Hes5	24.6147	7.94309	3.17741	2.49987	0.0124241	0.0676182	Up
Foxp1	3004.8	0.607858	0.248902	2.44216	0.0145998	0.0596631	Up	Foxl2os	278.484	11.367	1.62649	6.98869	2.77471e-12	7.74501e-11	Up	Hexim2	21.6293	7.75623	3.88947	1.99416	0.0461345	0.18198	Up
Foxp2	213.694	9.37454	1.74261	5.3796	7.46497e-08	1.15475e-06	Up	Foxp2	257.679	3.47334	0.835286	4.15827	3.20667e-05	0.000315538	Up	Hfm1	19.1668	7.58179	3.75401	2.01965	0.0434198	0.174068	Up
Foxq1	2332.15	6.53891	0.325155	20.1101	6.01418e-90	1.94181e-87	Up	Foxq1	2584.81	8.236	0.3599	22.8842	6.68111e-116	3.21111e-113	Up	Hhatl	28.6873	8.16396	3.01917	2.70404	0.00685027	0.0419221	Up
Foxred2	42.0692	8.49552	2.48628	3.41697	0.000633226	0.00419983	Up	Frem1	1716.65	0.741174	0.330987	2.23928	0.0251375	0.0919855	Up	Hhip	17.6456	7.46342	3.58849	2.07982	0.0375419	0.156524	Up
Frem1	979.073	5.83866	2.67686	2.18116	0.0291715	0.102686	Up	Frem2	1097.63	3.12144	0.34213	9.12355	7.27021e-20	3.37812e-18	Up	Hiat1	1427.29	1.20263	0.407749	2.94944	0.00318352	0.0225873	Up
Frmd4b	3969.91	1.11125	0.192837	5.76265	8.28016e-09	1.49053e-07	Up	Frmd4b	4554.69	0.988676	0.196981	5.01915	5.19017e-07	7.48826e-06	Up	Hic1	869.724	1.15971	0.545125	2.12743	0.0333846	0.14428	Up
Frmd5	83.4267	9.48221	2.17858	4.35246	1.34617e-05	0.000134662	Up	Frmd5	112.092	2.22279	1.1287	1.96934	0.0489138	0.152967	Up	Hipk3	6030.55	0.720949	0.18307	3.93811	8.21276e-05	0.000986088	Up
Frmd6	1325.13	3.24074	0.289903	11.1787	5.18355e-29	3.74574e-27	Up	Frmpd4	77.9304	9.52881	2.54318	3.74681	0.000179097	0.00145357	Up	Hist1h2bk	29.8689	8.22202	3.05603	2.69042	0.00713611	0.0433404	Up
Frmpd1	24.2138	6.15886	2.56095	2.40491	0.0161764	0.0647527	Up	Frrs1	448.718	2.02149	0.451278	4.47947	7.4827e-06	8.49955e-05	Up	Hmcn1	7681.91	4.04171	0.202384	19.9705	9.94153e-89	6.88044e-86	Up
Frmpd4	70.5838	9.24113	2.75291	3.35686	0.000788341	0.00507045	Up	Fry	3997.15	2.74688	0.180896	15.1849	4.45573e-52	6.28708e-50	Up	Hmgcll1	35.0628	8.45351	2.81524	3.00276	0.00267541	0.0194536	Up
Fry	3223.94	4.87276	0.253121	19.2508	1.39102e-82	3.83796e-80	Up	Fscn1	8289.72	0.708474	0.120338	5.88738	3.92369e-09	7.77658e-08	Up	Hmgcs2	3522.52	5.20293	0.31203	16.6745	2.01025e-62	8.27244e-60	Up
Frzb	423.095	4.03843	0.528885	7.63574	2.24522e-14	7.32713e-13	Up	Fstl5	58.8041	9.12235	2.02557	4.50361	6.6809e-06	7.63957e-05	Up	Homer1	660.348	1.14721	0.501962	2.28546	0.0222861	0.106573	Up
Fscn1	6830.34	1.05682	0.264152	4.0008	6.3128e-05	0.000542143	Up	Fth1	26063.7	3.666	0.165527	22.1475	1.10312e-108	4.84743e-106	Up	Hopx	239.306	4.25364	1.43676	2.96058	0.00307061	0.0218779	Up
Fstl5	53.0109	8.82801	2.26945	3.88993	0.000100275	0.000824754	Up	Fuca2	381.126	1.37603	0.506465	2.71692	0.00658923	0.0315797	Up	Hpca	212.14	7.06448	1.63684	4.31591	1.58946e-05	0.000230487	Up
Fth1	24061	3.1629	0.159211	19.8661	8.00415e-88	2.29175e-85	Up	Fut4	184.379	4.33992	1.46014	2.97225	0.00295622	0.0162555	Up	Hprt	2393.35	0.949168	0.293891	3.22966	0.00123938	0.0102337	Up
Fubp1	3514.45	0.876814	0.217479	4.03171	5.53724e-05	0.000482363	Up	Fut9	148.863	8.06706	1.63646	4.92958	8.24064e-07	1.15429e-05	Up	Hps3	713.983	1.30235	0.477186	2.72923	0.00634824	0.0394202	Up
Fuca2	353.927	1.21613	0.595403	2.04254	0.0410985	0.134725	Up	Fuz	115.815	1.60442	0.769922	2.08388	0.0371711	0.124417	Up	Hrasls	18.2691	7.51302	3.53363	2.12615	0.0334908	0.144579	Up
Furin	1858.15	0.780984	0.317968	2.45618	0.0140425	0.0579986	Up	Fxc1	300.793	1.71604	0.586484	2.92598	0.00343378	0.0183628	Up	Hrh3	51.8427	9.01769	3.85307	2.34039	0.0192636	0.0950138	Up
Fut4	157.779	10.4019	1.71975	6.0485	1.46205e-09	2.90401e-08	Up	Fxyd6	140.635	4.78049	1.42444	3.35604	0.000790677	0.00524391	Up	Hscb	30.3691	5.12334	2.45518	2.08675	0.0369112	0.154909	Up
Fut9	139.234	4.72916	1.82704	2.58842	0.00964162	0.0425448	Up	Fyco1	4214.4	1.21442	0.239843	5.06341	4.11832e-07	6.08451e-06	Up	Hsd17b11	2156.45	0.932396	0.285972	3.26045	0.00111237	0.00933181	Up
Fuz	82.967	4.09441	1.48248	2.76187	0.00574714	0.0275554	Up	Fzd1	766.634	0.973408	0.397697	2.44761	0.0143808	0.0590907	Up	Hsd17b12	1651.35	0.629099	0.300559	2.0931	0.0363403	0.153274	Up
Fxyd6	122.021	8.56776	1.70185	5.03437	4.79425e-07	6.47843e-06	Up	Fzd3	592.677	1.11575	0.340397	3.27779	0.00104624	0.00669909	Up	Hsd17b4	2928.68	0.946278	0.429337	2.20404	0.0275213	0.125086	Up
Fyco1	4300.27	0.663892	0.25341	2.61983	0.00879733	0.0394753	Up	Fzd6	7466.91	1.83656	0.151603	12.1143	8.87606e-34	7.50076e-32	Up	Hsdl1	328.927	2.2795	0.631903	3.60736	0.000309323	0.00316303	Up
Fzd1	468.305	5.04031	0.553201	9.11117	8.1496e-20	3.91026e-18	Up	Gab1	3096.76	1.43605	0.264127	5.43695	5.4201e-08	9.11051e-07	Up	Hsf4	47.5492	8.89316	2.51155	3.54091	0.000398755	0.00393426	Up
Fzd2	38.6624	8.37248	2.68879	3.11384	0.00184667	0.0105227	Up	Gabarapl1	2922.8	2.19632	0.211668	10.3762	3.18155e-25	1.97308e-23	Up	Hspa12b	3736.24	0.751221	0.275969	2.72213	0.00648632	0.0400722	Up
Fzd3	376.376	4.80859	0.638251	7.53401	4.92064e-14	1.54918e-12	Up	Gabarapl2	1789.72	0.60995	0.297204	2.05229	0.0401413	0.131861	Up	Htr2c	80.8937	9.65948	2.36813	4.07895	4.52401e-05	0.000581514	Up
Fzd6	6023.31	2.71438	0.209588	12.951	2.31801e-38	2.2405e-36	Up	Gabbr2	528.292	10.8121	2.3254	4.64957	3.32621e-06	4.09584e-05	Up	Htra1	1229.25	2.0127	0.422487	4.76394	1.89848e-06	3.5123e-05	Up
Gab1	2897.34	1.21842	0.241127	5.05304	4.34835e-07	5.93401e-06	Up	Gabpa	3389.47	0.552522	0.190809	2.89568	0.0037834	0.0198596	Up	Htra3	2568.61	8.00407	2.61945	3.05563	0.00224588	0.0168286	Up
Gabarapl1	3115.68	1.16331	0.226117	5.1447	2.67942e-07	3.80357e-06	Up	Gabra1	602.155	7.33136	2.15779	3.39763	0.00067972	0.00460939	Up	Hunk	304.051	3.24442	1.52761	2.12385	0.0336826	0.14516	Up
Gabbr1	2231.3	1.41083	0.684352	2.06156	0.0392499	0.129991	Up	Gabra3	106.422	3.77445	0.946262	3.9888	6.64084e-05	0.000600543	Up	Ica1l	193.709	2.65579	0.821025	3.23472	0.00121761	0.0100867	Up
Gabbr2	477.524	11.9996	3.05411	3.929	8.52997e-05	0.000715151	Up	Gabrb2	591.941	8.35099	2.20231	3.79193	0.000149481	0.00123803	Up	Icmt	1859.67	0.966992	0.35326	2.73734	0.00619383	0.0386949	Up
Gabpa	3010.84	0.584865	0.203583	2.87286	0.00406776	0.0206725	Up	Gabrb3	142.695	8.97131	1.8897	4.74749	2.05957e-06	2.67723e-05	Up	Ifltd1	61.4569	9.26323	2.33648	3.9646	7.35184e-05	0.000893369	Up
Gabra1	562.036	4.75805	2.12	2.24436	0.0248093	0.0907044	Up	Gabrg1	34.392	8.34837	2.76219	3.02237	0.00250801	0.0141657	Up	Ifnar1	8099.65	0.865084	0.176909	4.89	1.00834e-06	1.97562e-05	Up
Gabra3	99.45	3.14988	1.30898	2.40636	0.0161124	0.0646158	Up	Gabrg2	376.148	11.8001	3.94537	2.99088	0.00278175	0.015462	Up	Ifnar2	2620.81	0.508917	0.254625	1.99869	0.0456418	0.180833	Up
Gabra4	14.3364	6.94122	3.44896	2.01255	0.0441616	0.142274	Up	Gad1	976.44	13.1764	3.16675	4.16087	3.17034e-05	0.000313165	Up	Igdcc4	74.5037	9.54077	2.64535	3.60662	0.000310207	0.00316994	Up
Gabrb2	534.362	12.1618	3.84458	3.16336	0.00155961	0.00912731	Up	Gad2	368.19	4.10475	1.1072	3.70734	0.00020945	0.00165792	Up	Igf1r	17348.9	2.67021	0.202203	13.2056	8.14417e-40	1.63162e-37	Up
Gabrb3	132.432	5.16258	1.79865	2.87026	0.00410134	0.0208153	Up	Galc	645.416	1.76877	0.383797	4.6086	4.05388e-06	4.89009e-05	Up	Igfbp6	29.2705	8.19301	2.99234	2.738	0.00618149	0.0386368	Up
Gabrg1	31.1407	8.06034	3.08254	2.61484	0.00892686	0.0399484	Up	Galnt1	3366.63	0.376732	0.15387	2.44838	0.0143501	0.0589803	Up	Igfbp7	10175.3	2.78737	0.166853	16.7055	1.19593e-62	5.05813e-60	Up
Gabrg2	340.635	11.5122	3.9539	2.9116	0.00359582	0.018598	Up	Galnt13	86.6179	3.81311	1.8301	2.08355	0.0372008	0.124467	Up	Igfbpl1	35.5863	8.47484	2.81693	3.00854	0.00262508	0.0191792	Up
Gad1	891.984	6.67253	2.1062	3.16804	0.00153471	0.00900066	Up	Galnt7	845.453	0.938365	0.303523	3.09158	0.00199095	0.0115812	Up	Igsf1	27.5115	6.66318	3.07914	2.16398	0.0304663	0.134536	Up
Gad2	331.856	4.21902	1.38401	3.04841	0.00230058	0.0126997	Up	Galnt9	37.9611	8.49114	3.46279	2.45211	0.0142022	0.058482	Up	Igsf21	22.0827	7.78625	3.39056	2.29645	0.0216503	0.104121	Up
Galnt7	776.449	0.835387	0.415634	2.00991	0.0444408	0.142879	Up	Galntl2	117.404	5.62896	1.02826	5.47425	4.3938e-08	7.48357e-07	Up	Igsf5	482.828	4.11104	0.813507	5.05349	4.33819e-07	9.28946e-06	Up
Galnt9	34.3874	8.20366	3.90946	2.09841	0.0358686	0.121145	Up	Galntl6	22.2928	7.7228	3.21215	2.40425	0.0162057	0.0652131	Up	Igsf6	26.9266	8.07341	3.19823	2.52433	0.0115918	0.0641106	Up
Galntl1	92.8718	4.96241	1.68656	2.94233	0.00325751	0.017034	Up	Galt	240.464	2.87475	0.657908	4.36954	1.24511e-05	0.000134009	Up	Igsf9b	47.316	8.8857	2.7337	3.25043	0.00115229	0.00962411	Up
Galntl6	20.1907	7.43517	3.6141	2.05727	0.0396604	0.130997	Up	Gapdh	8511.3	0.573714	0.133434	4.29962	1.71092e-05	0.000179007	Up	Ikzf4	46.2135	8.85199	2.54509	3.47807	0.000505035	0.00479704	Up
Galt	222.837	2.52647	0.876233	2.88333	0.00393497	0.0200716	Up	Gapvd1	4918.26	0.60769	0.166093	3.65873	0.000253464	0.00196189	Up	Il11ra1	1199.12	2.16368	0.511156	4.2329	2.30692e-05	0.00031903	Up
Gap43	189.8	10.6683	1.71554	6.21863	5.01513e-10	1.05848e-08	Up	Gas2l3	2289.82	1.22865	0.29751	4.12979	3.63097e-05	0.000350341	Up	Il17rd	691.383	2.6304	0.487299	5.39792	6.74196e-08	1.73108e-06	Up
Gapvd1	4499.5	0.533073	0.195924	2.72082	0.00651211	0.0305854	Up	Gatm	1942.61	6.35049	0.303877	20.8982	5.55459e-97	1.94158e-94	Up	Il1r1	1060.07	2.90443	0.423519	6.85784	6.99073e-12	3.31591e-10	Up
Gars	1926.21	0.76734	0.329529	2.3286	0.0198803	0.0765271	Up	Gbe1	918.167	1.75782	0.380756	4.61665	3.8998e-06	4.73718e-05	Up	Il1rapl1	22.4562	7.81078	3.26974	2.38881	0.0169031	0.0860471	Up
Gas2l3	1661.06	2.6729	0.351764	7.59855	2.99461e-14	9.64825e-13	Up	Gcap14	4568.64	0.386949	0.145763	2.65465	0.00793912	0.0366677	Up	Il2rg	3644.09	0.897297	0.232131	3.86548	0.00011087	0.00127984	Up
Gata2	902.263	1.46105	0.427126	3.42064	0.000624736	0.00414645	Up	Gckr	14.0063	7.0525	3.0018	2.34943	0.0188024	0.0732475	Up	Il34	40.9117	7.18463	3.5471	2.0255	0.0428163	0.172238	Up
Gatad1	1499.65	0.692368	0.308946	2.24106	0.025022	0.0913421	Up	Gdap10	364.325	1.66293	0.755423	2.20133	0.027713	0.0995621	Up	Ildr2	6533.7	6.51468	1.69724	3.8384	0.00012384	0.00141137	Up
Gbe1	828.248	1.72445	0.362823	4.75287	2.00552e-06	2.38884e-05	Up	Gdap1l1	17.7627	7.39486	3.07913	2.40161	0.0163232	0.0655829	Up	Impdh1	2312.28	0.775977	0.287494	2.69911	0.00695262	0.0424121	Up
Gcap14	3879.38	0.574268	0.206723	2.77796	0.0054701	0.0265081	Up	Gde1	598.968	0.708911	0.32732	2.16581	0.0303261	0.106536	Up	Ina	243.216	11.2478	2.09644	5.36518	8.08698e-08	2.05907e-06	Up
Gclm	419.541	1.56087	0.545244	2.86269	0.00420062	0.021234	Up	Gdi2	11865.4	0.396443	0.142005	2.79176	0.00524223	0.0261093	Up	Inhba	30.2827	8.24185	3.0637	2.69016	0.00714173	0.0433573	Up
Gcnt2	309.914	1.8354	0.756259	2.42695	0.0152265	0.0616659	Up	Gdpd3	109.719	2.24728	0.994867	2.25888	0.0238911	0.0886263	Up	Inpp5f	1751.39	0.628947	0.292469	2.15047	0.031518	0.138099	Up
Gdap1	177.613	10.5726	4.50633	2.34618	0.0189671	0.0737735	Up	Gdpd5	1483.85	0.4641	0.220701	2.10285	0.0354792	0.119793	Up	Insc	21.6286	7.75672	3.30613	2.34616	0.0189678	0.0939896	Up
Gdap1l1	16.0735	7.10604	3.54249	2.00594	0.0448625	0.143748	Up	Gfap	267.322	11.3075	2.94956	3.83361	0.000126278	0.00106712	Up	Insm1	99.1626	6.51509	1.43148	4.5513	5.3315e-06	8.66355e-05	Up
Gde1	475.327	1.23237	0.587901	2.09622	0.0360628	0.121692	Up	Gfpt1	1504.7	0.768683	0.306708	2.50624	0.0122024	0.0518576	Up	Insr	5881.34	2.59461	0.218791	11.8588	1.93636e-32	3.27589e-30	Up
Gdf11	99.4538	2.90014	1.32804	2.18377	0.0289795	0.102223	Up	Ghitm	2584.04	0.488775	0.219312	2.22867	0.0258357	0.0940035	Up	Ipw	55.6986	9.12166	2.38615	3.82275	0.000131974	0.00148847	Up
Gdpd1	266.496	1.7138	0.649697	2.63784	0.00834365	0.0377729	Up	Gja1	1972.95	2.81206	0.203643	13.8087	2.25728e-43	2.4622e-41	Up	Iqsec1	4129.08	0.596972	0.220331	2.70943	0.00673982	0.0414127	Up
Gdpd5	952.3	2.09165	0.316385	6.6111	3.81485e-11	9.11659e-10	Up	Gjd2	22.3442	7.72638	3.8947	1.98382	0.0472759	0.149364	Up	Iqsec3	137.883	5.66944	1.49985	3.78	0.000156827	0.00174168	Up
Gfap	258.858	3.81196	1.21705	3.13213	0.00173542	0.0099943	Up	Glb1	664.914	1.1495	0.353886	3.24821	0.00116134	0.00731725	Up	Irak1	2202.1	0.774714	0.373003	2.07696	0.037805	0.157243	Up
Gfra1	15.6903	7.07246	3.29031	2.14948	0.0315962	0.109469	Up	Gldc	44.2858	8.71344	2.09545	4.15827	3.20666e-05	0.000315538	Up	Ireb2	3950.12	0.623724	0.226385	2.75515	0.00586654	0.0370639	Up
Gfra2	291.688	2.06718	0.99893	2.06939	0.0385094	0.127929	Up	Glra2	20.5431	7.60471	2.92462	2.60024	0.00931592	0.0417828	Up	Irf3	562.499	1.98038	0.576641	3.43434	0.000593997	0.00550804	Up
Ggnbp1	39.8599	5.8248	2.00468	2.9056	0.00366552	0.0189005	Up	Glrb	296.601	7.61138	1.30647	5.82593	5.67963e-09	1.10294e-07	Up	Irf5	36.6498	6.00434	2.38764	2.51476	0.0119113	0.0654263	Up
Git2	2652.22	0.751163	0.236592	3.17493	0.0014987	0.00881846	Up	Glrx	166.903	2.21255	0.747335	2.96059	0.00307052	0.0167641	Up	Islr	70.1763	9.45443	2.42083	3.90544	9.40526e-05	0.00110497	Up
Gja4	1457.84	0.588957	0.28838	2.04229	0.0411223	0.134751	Up	Gls2	18.2117	7.43133	2.74357	2.70863	0.00675616	0.0321602	Up	Ism1	300.216	4.82389	1.57945	3.05416	0.00225691	0.0168864	Up
Gjc1	471.709	1.94778	0.510779	3.81335	0.000137098	0.0010928	Up	Glt25d1	2859.39	0.52973	0.17804	2.97535	0.00292657	0.0161444	Up	Isyna1	2952.05	2.78743	0.247227	11.2748	1.74772e-29	2.58358e-27	Up
Gkn3	25.6334	6.23883	2.62063	2.38066	0.0172817	0.0684545	Up	Glt25d2	1136.88	1.86512	0.255985	7.28602	3.19244e-13	9.60855e-12	Up	Itch	2015.55	0.727813	0.354206	2.05477	0.0399013	0.163536	Up
Glcci1	667.434	3.43643	0.560893	6.12672	8.97102e-10	1.83506e-08	Up	Gltpd1	608.109	0.8378	0.372116	2.25145	0.024357	0.0899643	Up	Itga1	4094.91	1.74973	0.334541	5.23024	1.69287e-07	4.0149e-06	Up
Gli2	22.74	4.97136	2.44053	2.037	0.0416501	0.136069	Up	Glud1	6977.52	0.42302	0.118559	3.56802	0.000359686	0.00267374	Up	Itga4	4163.18	5.88341	0.411372	14.3019	2.12819e-46	5.22641e-44	Up
Gli3	101.661	2.54421	1.02884	2.4729	0.0134021	0.0556585	Up	Glul	15429.2	0.6421	0.108626	5.91112	3.39796e-09	6.80477e-08	Up	Itga7	68.5087	3.64706	1.61642	2.25626	0.0240544	0.113707	Up
Glmn	182.984	1.50801	0.764855	1.97163	0.0486524	0.152982	Up	Glyatl3	18.795	7.47673	2.73147	2.73725	0.00619549	0.0300874	Up	Itgb8	70.0617	9.45206	2.45086	3.85664	0.000114958	0.00131903	Up
Glrb	266.635	11.1587	1.86317	5.9891	2.1101e-09	4.11578e-08	Up	Gm11648	12.5283	6.89109	3.38697	2.03459	0.0418921	0.136043	Up	Itih2	38.0246	8.5703	3.31494	2.58536	0.00972778	0.0555988	Up
Glrx	135.666	3.26423	1.33796	2.43971	0.014699	0.0599779	Up	Gm12669	1476.15	0.692573	0.214932	3.22229	0.00127169	0.00792809	Up	Itih3	38.2634	8.57936	2.83199	3.02945	0.00244999	0.0181173	Up
Gls2	16.3991	7.13533	3.24145	2.20128	0.0277162	0.099033	Up	Gm13051	16.1223	7.25692	2.89548	2.5063	0.0122004	0.0518576	Up	Itih5	511.702	10.881	1.54645	7.03616	1.97616e-12	1.01652e-10	Up
Gltp	3028.91	0.593356	0.208781	2.842	0.00448321	0.0224389	Up	Gm13212	93.3958	2.46995	0.850053	2.90564	0.00366505	0.019344	Up	Itm2a	16240.8	5.97291	0.182174	32.7869	9.04412e-236	4.59019e-232	Up
Glul	13412.5	0.761746	0.151822	5.01737	5.23841e-07	7.00996e-06	Up	Gm13247	22.3708	7.72922	2.55122	3.02961	0.0024487	0.0138612	Up	Itm2c	5409.48	0.599025	0.256022	2.33974	0.0192971	0.0951262	Up
Glyatl3	16.9342	7.1816	3.21844	2.23139	0.0256553	0.0931386	Up	Gm13298	251.642	5.76343	1.18253	4.87383	1.09457e-06	1.5004e-05	Up	Itpka	101.91	9.99271	2.32213	4.30325	1.68312e-05	0.000241537	Up
Gm10052	5396.68	0.49202	0.181313	2.71365	0.00665469	0.031101	Up	Gm13308	22.8976	7.76167	2.54979	3.04404	0.00233422	0.0133063	Up	Itpr1	18348.1	2.4807	1.11233	2.23018	0.0257356	0.119321	Up
Gm10389	195.13	1.72994	0.851515	2.03161	0.0421936	0.137519	Up	Gm13629	14.4537	7.09825	2.93096	2.42182	0.0154431	0.0626625	Up	Jag2	2104.48	0.655667	0.333556	1.96569	0.0493347	0.190895	Up
Gm10536	16.1656	7.11583	3.4171	2.08242	0.0373042	0.12491	Up	Gm16845	13.4136	5.54427	2.59848	2.13366	0.0328707	0.113253	Up	Jak2	3497.16	1.58402	0.393346	4.02705	5.64812e-05	0.000708388	Up
Gm12669	1237.84	0.960611	0.366083	2.62402	0.00868977	0.0390602	Up	Gm1987	1354.25	13.6484	1.46783	9.29833	1.42669e-20	6.87907e-19	Up	Jakmip1	25.9012	8.01629	3.29552	2.43248	0.0149958	0.0784086	Up
Gm12824	183.29	2.34057	0.709205	3.30027	0.000965912	0.00607196	Up	Gm2382	62.0589	4.20194	1.69421	2.48017	0.0131318	0.0550321	Up	Jakmip2	112.254	10.1322	2.4395	4.15341	3.27557e-05	0.000437106	Up
Gm13152	251.154	2.35391	1.16269	2.02454	0.0429142	0.139359	Up	Gm2a	789.547	2.49044	0.362818	6.86414	6.68913e-12	1.80806e-10	Up	Jam2	4816.65	0.743896	0.291486	2.55208	0.0107082	0.0600304	Up
Gm13298	221.064	10.8889	1.66809	6.52773	6.67742e-11	1.55176e-09	Up	Gm3500	137.465	1.89241	0.862146	2.195	0.0281637	0.100734	Up	Jmjd8	910.124	1.29472	0.405864	3.19003	0.00142257	0.0114786	Up
Gm13308	20.6201	7.46579	2.99201	2.49524	0.0125872	0.0530292	Up	Gm3716	166.22	1.49282	0.694988	2.14798	0.0317156	0.110359	Up	Jmy	4102.7	1.22759	0.247508	4.9598	7.05658e-07	1.44026e-05	Up
Gm13315	19.1541	5.80304	2.77749	2.08931	0.0366799	0.123337	Up	Gm3893	253.574	5.77566	1.21439	4.75601	1.97453e-06	2.58726e-05	Up	Jph3	53.17	6.54843	2.36838	2.76494	0.00569334	0.0362252	Up
Gm15663	216.015	1.97773	0.950621	2.08046	0.0374836	0.125372	Up	Gm4349	24.7452	7.87468	3.76874	2.08947	0.0366653	0.122967	Up	Jrkl	123.788	3.45518	1.33351	2.59103	0.00956879	0.0548548	Up
Gm16675	28.661	7.94153	2.64309	3.00464	0.00265893	0.0143694	Up	Gm4980	49.5189	2.41363	1.09206	2.21016	0.0270939	0.0977261	Up	Kank1	1183.58	1.99004	0.406666	4.89354	9.9038e-07	1.94574e-05	Up
Gm16897	86.4902	2.28063	1.05191	2.16809	0.0301521	0.105307	Up	Gm5069	113.406	1.88652	0.823872	2.28982	0.0220316	0.0831115	Up	Kank3	4356.7	0.585137	0.250466	2.33619	0.0194812	0.09574	Up
Gm1821	10244.5	0.451828	0.159255	2.83714	0.00455203	0.0227078	Up	Gm5083	57.4664	5.5099	2.78762	1.97656	0.0480913	0.151071	Up	Kbtbd11	4279.67	1.77935	0.283763	6.27053	3.59829e-10	1.34661e-08	Up
Gm1987	1215.23	13.3472	1.48279	9.00142	2.22826e-19	1.04042e-17	Up	Gm5506	4255.69	1.54684	0.239095	6.46954	9.83031e-11	2.35132e-09	Up	Kcna1	268.413	9.95438	1.89592	5.25043	1.51744e-07	3.64424e-06	Up
Gm2897	66.5886	9.15714	2.08119	4.39995	1.08277e-05	0.000110301	Up	Gm5567	220.955	8.02123	1.58817	5.05061	4.4041e-07	6.47562e-06	Up	Kcna2	417.039	3.61956	1.24249	2.91314	0.00357816	0.0248658	Up
Gm2a	774.063	1.81109	0.421511	4.29666	1.73388e-05	0.000168881	Up	Gm6639	56.9186	9.07671	2.07611	4.37199	1.23122e-05	0.000132792	Up	Kcna4	30.5073	6.81257	2.81004	2.42437	0.0153351	0.0797174	Up
Gm3317	32.7217	5.78742	2.09374	2.76415	0.00570712	0.0274276	Up	Gm694	112.177	10.0552	1.72693	5.82257	5.79505e-09	1.12393e-07	Up	Kcna6	818.4	3.33834	0.57334	5.82261	5.7934e-09	1.78203e-07	Up
Gm3494	32.7217	5.78742	2.09374	2.76415	0.00570712	0.0274276	Up	Gm88	43.389	6.12567	2.92912	2.0913	0.0365014	0.122548	Up	Kcnab1	125.08	10.2883	2.36222	4.35536	1.32845e-05	0.000195809	Up
Gm3500	97.3582	9.70531	1.87819	5.16737	2.37413e-07	3.39562e-06	Up	Gm8817	23.7129	7.81369	2.67837	2.91732	0.00353048	0.018795	Up	Kcnab2	83.8701	9.71162	2.49799	3.88777	0.000101169	0.00118129	Up
Gm3696	42.7701	8.51903	3.68898	2.30932	0.0209258	0.0796165	Up	Gmds	459.964	1.03	0.395185	2.60638	0.00915051	0.0411987	Up	Kcnb2	30.1036	8.23327	3.59804	2.28826	0.0221223	0.105956	Up
Gm3716	112.983	5.09245	1.59268	3.1974	0.00138671	0.00824257	Up	Gmfb	3220.55	0.456879	0.182499	2.50345	0.0122987	0.0521662	Up	Kcnc1	223.373	5.94376	1.50982	3.93674	8.25962e-05	0.000990244	Up
Gm3893	222.53	10.8985	1.70048	6.40906	1.46422e-10	3.29179e-09	Up	Gmpr	698.484	2.27366	0.489665	4.64329	3.42913e-06	4.19904e-05	Up	Kcnc3	551.821	5.81324	1.49129	3.89813	9.69378e-05	0.00113537	Up
Gm5083	50.9281	8.77031	3.58756	2.44464	0.0144996	0.0593876	Up	Gnai2	25993.1	0.349395	0.111439	3.13531	0.00171672	0.0102298	Up	Kcnc4	44.9881	8.81291	2.78452	3.16497	0.001551	0.0123706	Up
Gm5124	25.9892	7.79942	2.91162	2.67872	0.00739032	0.0340462	Up	Gnal	436.912	3.86299	0.749586	5.1535	2.5567e-07	3.86268e-06	Up	Kcnd2	90.106	9.81509	2.41692	4.061	4.88632e-05	0.00062363	Up
Gm5177	24.8784	5.25304	2.05341	2.55821	0.0105213	0.0457612	Up	Gnas	20148.9	0.308616	0.119001	2.59338	0.00950379	0.0424661	Up	Kcne1l	54.0982	5.55129	2.11649	2.62288	0.00871909	0.0510603	Up
Gm5506	4176.07	1.08539	0.255085	4.255	2.09054e-05	0.000199271	Up	Gnaz	101.935	9.91606	1.87752	5.28147	1.2815e-07	2.02564e-06	Up	Kcng4	80.2161	9.64734	2.49258	3.87043	0.000108644	0.00125796	Up
Gm5567	200.656	7.22191	1.64899	4.37961	1.18892e-05	0.00012044	Up	Gnb4	2970.1	0.840777	0.160378	5.24246	1.58453e-07	2.47663e-06	Up	Kcnip1	182.63	10.8345	2.25819	4.79786	1.6037e-06	2.99974e-05	Up
Gm5643	546.412	12.1939	1.62582	7.50014	6.37497e-14	1.97429e-12	Up	Gng12	3194.64	0.699952	0.188331	3.7166	0.000201921	0.0016116	Up	Kcnip4	74.9775	8.11758	2.80724	2.89166	0.00383215	0.0263424	Up
Gm694	100.364	9.74962	1.87496	5.19991	1.99385e-07	2.88709e-06	Up	Gng3	109.302	2.90966	1.15334	2.52281	0.0116423	0.0499325	Up	Kcnj10	364.051	2.95769	0.99892	2.96088	0.00306759	0.0218666	Up
Gm7120	169.806	1.94094	0.906231	2.14177	0.0322122	0.111374	Up	Gnl3l	2048.25	0.575256	0.195902	2.93644	0.00332001	0.0178663	Up	Kcnj13	20.5275	7.68081	3.54515	2.16657	0.030268	0.133854	Up
Gm7334	440.551	1.1882	0.566923	2.09589	0.0360923	0.121738	Up	Gnpnat1	232.072	1.21069	0.532711	2.2727	0.0230445	0.0861017	Up	Kcnj2	4959.93	3.81707	0.269208	14.1789	1.23752e-45	2.99086e-43	Up
Gm8817	21.1115	7.50088	3.09883	2.42056	0.0154968	0.0625769	Up	Gnptab	832.023	0.889822	0.414657	2.14593	0.0318789	0.110762	Up	Kcnj3	46.0851	8.84768	3.05022	2.90067	0.0037237	0.0257013	Up
Gm98	67.4352	5.27312	1.816	2.90369	0.00368791	0.0189966	Up	Gnptg	219.032	1.44288	0.667262	2.16239	0.030588	0.107205	Up	Kcnj9	56.8275	9.15015	3.7747	2.42407	0.0153476	0.079755	Up
Gm996	23.2869	5.00107	2.54785	1.96286	0.0496621	0.155514	Up	Golga7b	32.9156	8.28535	3.56549	2.32376	0.0201382	0.0772962	Up	Kcnk1	51.7177	9.01404	2.70628	3.33079	0.00086601	0.00755204	Up
Gmpr2	333.209	1.21966	0.607732	2.0069	0.04476	0.143568	Up	Golim4	7411.24	1.18245	0.146994	8.04423	8.67921e-16	3.09713e-14	Up	Kcnk2	62.2192	9.28114	2.30393	4.02839	5.61605e-05	0.000705528	Up
Gnai2	20368.7	0.83579	0.171228	4.88117	1.0546e-06	1.3248e-05	Up	Golm1	3420.68	1.87544	0.156171	12.0089	3.19049e-33	2.65242e-31	Up	Kcnma1	523.141	12.3529	3.73545	3.30692	0.000943264	0.00813646	Up
Gnal	422.628	2.77775	0.895626	3.10146	0.00192571	0.0108837	Up	Got2	2295.42	0.708687	0.325659	2.17617	0.0295429	0.104285	Up	Kcnn2	75.8047	9.56575	2.65029	3.60933	0.00030699	0.00314551	Up
Gnao1	699.765	3.92538	1.17122	3.35152	0.000803697	0.00515038	Up	Gpam	536.068	2.09759	0.429364	4.88533	1.03255e-06	1.42172e-05	Up	Kcnq2	70.9691	9.47062	2.50727	3.77727	0.00015856	0.00175964	Up
Gnas	15811.2	0.780716	0.122496	6.37342	1.84859e-10	4.10722e-09	Up	Gpcpd1	6887.14	3.38651	0.20833	16.2555	2.04195e-59	3.3769e-57	Up	Kcnq4	100.962	9.9793	2.09838	4.75572	1.97737e-06	3.62303e-05	Up
Gnb4	2724.63	0.751329	0.199037	3.77482	0.000160125	0.00125059	Up	Gpd2	4511.92	2.49389	0.221546	11.2567	2.14535e-29	1.52757e-27	Up	Kcnt1	32.7106	8.35305	3.1992	2.61098	0.00902838	0.0524479	Up
Gng3	87.1446	9.54512	2.15694	4.42531	9.63032e-06	9.91453e-05	Up	Gpi1	5190.81	0.61158	0.142063	4.30499	1.66994e-05	0.000175315	Up	Kcnv1	21.2503	7.73078	3.45503	2.23754	0.0252509	0.117719	Up
Gng4	32.9658	8.14275	2.55753	3.18383	0.00145339	0.0085718	Up	Gpm6a	435.835	4.54508	1.15768	3.92601	8.63681e-05	0.000761664	Up	Kcp	1283.24	6.47487	2.70612	2.39268	0.0167259	0.0853447	Up
Gnpat	982.703	0.954494	0.335431	2.84557	0.00443315	0.0222684	Up	Gpm6b	1535.56	0.781467	0.39012	2.00314	0.045162	0.144226	Up	Kctd17	2707.1	0.692464	0.296931	2.33207	0.0196972	0.0964958	Up
Gnpda2	361.011	1.23504	0.495229	2.49388	0.0126355	0.053178	Up	Gpr114	12.1572	6.84998	3.33534	2.05376	0.0399991	0.131478	Up	Kctd18	345.558	1.5852	0.627339	2.52686	0.0115088	0.0637212	Up
Golim4	6047.96	1.68095	0.215173	7.81209	5.62458e-15	1.93544e-13	Up	Gpr123	48.6617	7.37429	2.01274	3.66381	0.000248496	0.00193023	Up	Kctd21	78.0034	7.11607	1.8913	3.76252	0.000168209	0.00184921	Up
Golm1	3050.42	1.91165	0.227419	8.40584	4.24807e-17	1.71905e-15	Up	Gpr124	4985.38	0.427061	0.142247	3.00224	0.00267998	0.0149993	Up	Kdelr1	2803.89	0.978975	0.237421	4.12337	3.73372e-05	0.000488818	Up
Gpam	504.274	1.77208	0.471178	3.76095	0.000169267	0.0013132	Up	Gpr143	25.4262	7.91382	2.43568	3.24912	0.00115761	0.00730271	Up	Kdm5b	3245.73	0.655926	0.267091	2.45582	0.0140565	0.074651	Up
Gpc2	155.157	1.59414	0.800013	1.99264	0.046301	0.147485	Up	Gpr155	592.858	4.39456	0.487163	9.02073	1.86848e-19	8.4027e-18	Up	Kdr	49165.7	1.07182	0.1667	6.42967	1.27883e-10	5.12407e-09	Up
Gpc3	50.3772	8.75443	2.34217	3.73774	0.000185681	0.00142597	Up	Gpr158	31.9546	8.2426	3.58908	2.29657	0.0216431	0.0819878	Up	Kdsr	683.341	1.50154	0.466083	3.22161	0.00127471	0.0104629	Up
Gpcpd1	6403.89	2.86387	0.236168	12.1264	7.65248e-34	6.67393e-32	Up	Gpr162	86.9855	4.04874	1.8229	2.22105	0.0263478	0.0954828	Up	Khnyn	830.98	1.37892	0.400877	3.43975	0.000582242	0.00541883	Up
Gpd2	3764.04	3.36632	0.268047	12.5587	3.56121e-36	3.33589e-34	Up	Gpr17	165.183	4.57697	1.43751	3.18396	0.00145273	0.00888037	Up	Kif1a	1416.47	9.8211	2.42146	4.05586	4.99494e-05	0.000636427	Up
Gpi1	4395.31	0.829982	0.169424	4.89883	9.64069e-07	1.22016e-05	Up	Gpr26	50.5292	8.90346	2.15115	4.13893	3.48924e-05	0.000338363	Up	Kif1b	6745	0.6161	0.183053	3.36568	0.000763544	0.00679469	Up
Gpm6b	911.527	4.52048	0.719186	6.28556	3.26676e-10	7.08187e-09	Up	Gpr31c	26.6449	4.9322	1.75594	2.80886	0.00497165	0.025021	Up	Kif1c	8145.79	0.696195	0.177211	3.92863	8.54311e-05	0.00101782	Up
Gpr123	43.6123	8.5464	2.41792	3.53461	0.00040838	0.00285189	Up	Gpr37	30.1015	4.21663	2.02775	2.07946	0.0375754	0.125496	Up	Kif21b	254.295	2.39797	1.17073	2.04827	0.0405336	0.165504	Up
Gpr125	712.068	1.69641	0.38959	4.35435	1.3346e-05	0.000133769	Up	Gpr37l1	71.0816	5.50531	1.82732	3.01278	0.00258868	0.0145572	Up	Kif5a	773.247	9.91733	1.33183	7.44638	9.59389e-14	5.72849e-12	Up
Gpr137c	52.9205	7.30559	2.44462	2.98844	0.00280409	0.0150202	Up	Gpr4	1662.77	2.90518	0.370443	7.84245	4.41851e-15	1.51351e-13	Up	Kif5b	12088	0.522109	0.140297	3.72145	0.000198083	0.00212246	Up
Gpr161	39.9864	8.42182	2.3587	3.57053	0.000356261	0.00252983	Up	Gpr56	345.904	1.74454	0.541086	3.22414	0.00126351	0.00788349	Up	Kif5c	1411.22	5.53172	2.14485	2.57908	0.00990651	0.0563263	Up
Gpr162	74.114	9.31142	2.25756	4.12455	3.71465e-05	0.000338354	Up	Gpr63	119.242	4.20201	1.26518	3.32128	0.000896041	0.00584689	Up	Kifc2	185.042	3.40988	1.563	2.18162	0.0291373	0.130445	Up
Gpr17	143.611	7.32382	1.37748	5.31684	1.05585e-07	1.59587e-06	Up	Gpr85	306.122	5.96549	1.10443	5.40141	6.61199e-08	1.09701e-06	Up	Klc1	4576.09	0.662401	0.205473	3.22379	0.00126506	0.0103993	Up
Gpr26	45.603	8.61077	2.41773	3.56151	0.000368734	0.00260258	Up	Gprasp1	1624.47	1.5568	0.442795	3.51585	0.000438341	0.0031577	Up	Klf12	830.701	1.38721	0.403339	3.43931	0.000583192	0.00542436	Up
Gpr31c	23.0343	7.62644	2.89655	2.63294	0.00846499	0.0381881	Up	Gprasp2	213.439	2.85982	0.809382	3.53334	0.000410346	0.0029854	Up	Klhdc5	496.169	3.18807	0.697873	4.56826	4.91788e-06	8.14795e-05	Up
Gpr37	25.7117	7.78416	2.78275	2.79729	0.00515339	0.0252267	Up	Gprc5b	432.326	2.45796	0.706505	3.47905	0.000503202	0.00356751	Up	Klhdc8a	20.363	7.66923	3.51898	2.17939	0.0293026	0.131031	Up
Gpr37l1	62.8745	9.07413	2.40023	3.78052	0.000156503	0.00122609	Up	Gprin1	94.2822	3.75308	1.7088	2.19633	0.0280686	0.100464	Up	Klhdc8b	188.234	4.00353	0.952772	4.20198	2.64594e-05	0.000361968	Up
Gpr4	2068.17	0.801068	0.271998	2.94512	0.00322828	0.0168987	Up	Gpsm2	394.795	1.07926	0.462665	2.3327	0.0196638	0.0759111	Up	Klhdc9	19.216	7.58608	3.45561	2.19529	0.0281427	0.127227	Up
Gpr85	287.247	3.98302	1.56502	2.54503	0.0109267	0.047173	Up	Gpx1	1899.13	1.00291	0.194074	5.16766	2.37046e-07	3.60782e-06	Up	Klhl1	97.9527	22.6596	3.38317	6.69774	2.11673e-11	9.26132e-10	Up
Gprasp1	1307.63	2.33569	0.547683	4.26467	2.00194e-05	0.000192153	Up	Gpx4	1738.52	1.03282	0.265393	3.89167	9.95546e-05	0.000867999	Up	Klhl12	199.645	3.3616	1.45389	2.31214	0.0207701	0.100651	Up
Gprc5b	386.714	2.53629	0.832462	3.04673	0.00231344	0.0127567	Up	Grap	3890.22	1.01275	0.153224	6.60962	3.85321e-11	9.65184e-10	Up	Klhl13	287.945	2.3436	1.12165	2.08943	0.0366694	0.154149	Up
Gprin1	79.09	9.40525	2.05924	4.56734	4.93951e-06	5.4435e-05	Up	Grb14	696.191	2.47891	0.388292	6.38414	1.72364e-10	4.01053e-09	Up	Klhl20	626.549	1.0169	0.514609	1.97607	0.0481471	0.187875	Up
Gps1	637.913	0.885364	0.378655	2.33818	0.0193777	0.0749953	Up	Grb7	114.99	10.0909	1.7096	5.90247	3.58109e-09	7.16219e-08	Up	Klhl29	41.5383	8.6979	2.71759	3.20059	0.00137148	0.0111312	Up
Gpsm2	334.682	1.34071	0.548563	2.44404	0.0145239	0.0594553	Up	Grcc10	1288.2	1.6927	0.282076	6.00086	1.96271e-09	4.05732e-08	Up	Klhl5	2740.98	1.85207	0.324344	5.71021	1.12837e-08	3.34612e-07	Up
Grap	3826.24	0.642404	0.248433	2.58583	0.0097146	0.0427776	Up	Gria1	775.461	2.01563	0.816441	2.4688	0.0135568	0.0563678	Up	Kndc1	66.2335	9.37098	2.5355	3.69591	0.000219103	0.00232154	Up
Grb14	530.164	10.7075	1.47606	7.25411	4.04309e-13	1.15981e-11	Up	Gria2	935.182	11.6894	2.05627	5.68476	1.30995e-08	2.41571e-07	Up	Kpna3	1468.93	0.833708	0.343785	2.42509	0.0153047	0.0795866	Up
Grb7	103.214	8.36682	1.76142	4.75004	2.03375e-06	2.41867e-05	Up	Gria4	157.94	6.00033	1.23794	4.84703	1.25326e-06	1.69975e-05	Up	Kras	2498.52	0.6505	0.250481	2.597	0.00940423	0.0541356	Up
Grem2	23.4913	7.65357	3.12814	2.44669	0.0144176	0.0591797	Up	Grid2	486.506	10.6841	2.59486	4.11739	3.83181e-05	0.000367873	Up	Krt222	282.205	11.4625	1.6677	6.87322	6.27703e-12	3.0341e-10	Up
Gria1	703.201	1.99262	0.904945	2.20193	0.0276703	0.0989158	Up	Grid2ip	78.8782	9.54607	2.13837	4.46417	8.03785e-06	9.08319e-05	Up	Ksr2	56.1194	9.13189	2.68863	3.39649	0.00068257	0.00618619	Up
Gria2	845.157	10.3866	1.31736	7.88438	3.16105e-15	1.11039e-13	Up	Grik1	107.729	5.72871	1.3012	4.40264	1.06943e-05	0.000117113	Up	L1cam	391.448	4.35435	0.996267	4.37067	1.23868e-05	0.000184723	Up
Gria3	179.934	10.5913	2.17095	4.87864	1.06817e-06	1.33963e-05	Up	Grik3	52.2415	4.22672	1.63161	2.59052	0.00958304	0.0427209	Up	LOC100503496	20.4824	7.67788	3.41046	2.25128	0.0243681	0.114941	Up
Grid1	30.0345	8.00837	4.03943	1.98255	0.0474178	0.150316	Up	Grik4	51.1412	5.2138	1.98668	2.62438	0.00868067	0.0394879	Up	LOC626904	16.6486	7.37958	3.68007	2.00528	0.044933	0.178722	Up
Grid2	441.18	8.68421	2.63479	3.29597	0.000980811	0.00614525	Up	Grin1	432.564	12.0018	3.49666	3.43236	0.000598355	0.00413339	Up	Lama1	1721.99	2.8069	0.579182	4.84631	1.25777e-06	2.42109e-05	Up
Grid2ip	74.2508	4.63157	2.03367	2.27744	0.02276	0.0850712	Up	Grina	671.853	1.48974	0.310745	4.79408	1.63425e-06	2.17429e-05	Up	Lama4	18715.1	1.25823	0.199073	6.32043	2.60833e-10	9.95348e-09	Up
Grik1	95.5647	9.6782	2.14934	4.50286	6.7044e-06	7.16473e-05	Up	Grip1	25.2504	6.40826	2.29807	2.78855	0.00529454	0.0262819	Up	Lamb1	8639.78	1.28967	0.22396	5.75851	8.48618e-09	2.55862e-07	Up
Grik2	48.8738	8.7111	2.22367	3.91745	8.94905e-05	0.000745754	Up	Grm1	1129.61	3.67735	1.7185	2.13986	0.0323659	0.111963	Up	Lamtor3	1018.49	0.875082	0.388166	2.2544	0.0241711	0.114153	Up
Grik4	46.0791	5.51312	1.97087	2.79731	0.00515306	0.0252267	Up	Grm3	53.7073	8.99159	2.04236	4.40255	1.06985e-05	0.000117113	Up	Lancl3	89.6801	3.2829	1.32163	2.48397	0.0129925	0.0702251	Up
Grin1	391.547	11.7132	3.50708	3.33986	0.000838198	0.00535339	Up	Grm5	148.85	7.49513	1.61257	4.64793	3.35275e-06	4.12193e-05	Up	Larp6	28.7324	8.16604	3.10135	2.63306	0.008462	0.0499164	Up
Grin2d	33.5168	8.16666	3.93333	2.07627	0.0378692	0.126328	Up	Grm6	13.9732	7.04951	2.96428	2.37816	0.0173995	0.0689972	Up	Lass1	46.3593	8.85639	3.9573	2.23799	0.0252217	0.117655	Up
Grin3a	38.3728	8.3617	3.01286	2.77533	0.00551449	0.0266674	Up	Grm7	36.6769	8.44111	2.39633	3.52251	0.000427482	0.00309251	Up	Lcp1	5003.77	1.28155	0.271606	4.71841	2.37696e-06	4.2881e-05	Up
Grk5	658.842	2.97733	0.442326	6.73108	1.68411e-11	4.17587e-10	Up	Grsf1	1670.67	0.690207	0.20477	3.37065	0.000749898	0.005008	Up	Lcp2	384.728	3.26091	1.49036	2.18799	0.0286701	0.128732	Up
Grm3	48.3905	8.69647	2.30395	3.77459	0.000160271	0.00125108	Up	Gsg1l	308.866	9.03205	1.42932	6.31913	2.63042e-10	5.99345e-09	Up	Ldlrad3	2693.14	2.22691	0.286632	7.76922	7.89693e-15	5.1827e-13	Up
Grm5	137.219	5.37286	1.82524	2.94365	0.00324367	0.0169733	Up	Gspt2	24.6325	7.86726	2.45736	3.2015	0.00136712	0.00842849	Up	Lef1	2074.66	6.21984	0.697545	8.91676	4.80146e-19	4.48509e-17	Up
Grm7	33.1395	8.15009	2.71669	3.00001	0.00269973	0.0145536	Up	Gsta4	439.845	3.66333	0.410535	8.9233	4.52577e-19	1.98309e-17	Up	Lgi3	49.5987	8.95375	2.59588	3.44921	0.000562231	0.00525831	Up
Grp	26.2109	7.81178	2.81344	2.7766	0.00549314	0.0265798	Up	Gstm7	403.849	3.52785	0.600878	5.87116	4.32756e-09	8.52213e-08	Up	Lhfpl2	3973.15	2.60603	0.283407	9.19536	3.73745e-20	3.62461e-18	Up
Grsf1	1417.63	0.90972	0.263829	3.44815	0.00056444	0.00379499	Up	Gtf2i	8542.55	0.527738	0.16165	3.2647	0.00109578	0.00697563	Up	Lhfpl3	48.8059	8.93059	2.54663	3.50682	0.000453492	0.00438683	Up
Gsg1l	279.258	8.70251	1.51837	5.73148	9.95594e-09	1.76703e-07	Up	Gtf3c4	1621.85	0.706886	0.261677	2.70137	0.00690541	0.0326685	Up	Lhfpl4	354.856	3.72758	1.19869	3.1097	0.00187276	0.0144891	Up
Gsk3a	970.653	0.872371	0.321726	2.71154	0.00669723	0.0312709	Up	Gyk	224.578	1.31783	0.610931	2.15708	0.0309994	0.108382	Up	Lin28b	25.9153	6.52731	3.0809	2.11863	0.0341214	0.146636	Up
Gspt2	22.1476	7.56905	2.88916	2.61981	0.0087978	0.0394753	Up	Gzf1	884.086	0.579348	0.27427	2.11233	0.0346582	0.117696	Up	Lin7a	61.453	7.79686	2.18319	3.57132	0.000355189	0.00356031	Up
Gsta4	372.267	5.73971	1.0087	5.69018	1.26905e-08	2.21354e-07	Up	H2afv	1135.26	0.552181	0.240854	2.29259	0.0218714	0.0826084	Up	Lingo1	53.0986	9.05205	2.75364	3.28731	0.0010115	0.00862804	Up
Gstm1	716.992	2.51406	0.431151	5.83104	5.50831e-09	1.0132e-07	Up	H47	715.298	1.05104	0.360333	2.91686	0.00353572	0.0188164	Up	Lingo2	44.4549	8.79569	2.92468	3.00741	0.00263486	0.0192414	Up
Gstm7	332.248	11.4767	1.61078	7.1249	1.04153e-12	2.90003e-11	Up	Hadh	1517.15	1.40261	0.271441	5.16727	2.37533e-07	3.60994e-06	Up	Lingo3	138.064	4.87556	2.03322	2.39795	0.016487	0.0843518	Up
Gtf2h5	571.985	1.14622	0.418939	2.73599	0.00621921	0.0294375	Up	Hadhb	2174.18	1.08454	0.256268	4.23205	2.31571e-05	0.000234622	Up	Lipa	2649.58	1.52284	0.307996	4.94435	7.64001e-07	1.54484e-05	Up
Gtf2i	7059.25	0.836953	0.186499	4.48771	7.19926e-06	7.64512e-05	Up	Hapln3	184.772	1.49615	0.586944	2.54904	0.0108019	0.0470233	Up	Lipc	117.772	10.2021	1.97063	5.17706	2.25413e-07	5.22842e-06	Up
Gtf3c4	1284.99	1.23637	0.273468	4.52109	6.15233e-06	6.60975e-05	Up	Hapln4	120.277	8.68966	1.90996	4.54966	5.37318e-06	6.27954e-05	Up	Lipe	324.695	2.07789	0.871221	2.38503	0.0170776	0.0866169	Up
Gtpbp4	1032.9	1.35954	0.368996	3.68444	0.000229207	0.00171425	Up	Haus2	527.891	1.04194	0.465108	2.24021	0.0250772	0.0918741	Up	Lmbr1	1722.7	2.83932	0.379068	7.49025	6.87419e-14	4.14445e-12	Up
Gulp1	105.089	9.81547	1.86983	5.24939	1.52606e-07	2.25712e-06	Up	Hax1	1112.71	0.563963	0.244273	2.30874	0.020958	0.0799353	Up	Lmbrd1	1778.7	1.0322	0.386721	2.66911	0.00760529	0.0457881	Up
Gusb	1552.24	0.915348	0.322174	2.84116	0.00449496	0.0224822	Up	Hbb-b1	5399.68	1.03773	0.315407	3.29013	0.00100142	0.00644968	Up	Lmod1	19.3903	7.59935	3.45106	2.20204	0.0276628	0.125654	Up
Gyk	148.845	4.98152	1.29621	3.84314	0.000121471	0.000983102	Up	Hbxip	1029.26	0.86834	0.424193	2.04704	0.0406543	0.13312	Up	Lmtk2	2024.05	0.540242	0.271007	1.99346	0.046211	0.182235	Up
H2-Q7	15.1053	7.01776	3.36489	2.08558	0.0370167	0.124111	Up	Hcls1	138.031	1.93265	0.760383	2.54168	0.0110321	0.0478088	Up	Lnx1	33.593	8.39152	3.5145	2.38768	0.016955	0.0861573	Up
H2afv	906.969	1.00637	0.33368	3.01599	0.00256143	0.0139118	Up	Hcn1	270.498	3.72186	1.08227	3.43895	0.00058397	0.0040568	Up	Lonrf1	60.0144	3.07554	1.43117	2.14897	0.0316368	0.13858	Up
H2afy2	195.828	6.34755	1.16971	5.42662	5.74325e-08	9.07852e-07	Up	Hcn2	161.854	5.34211	0.843433	6.33377	2.39246e-10	5.48376e-09	Up	Lonrf2	225.076	6.03227	1.74255	3.46175	0.000536678	0.00505347	Up
H3f3a	8368.89	0.473493	0.16455	2.87751	0.00400823	0.0204042	Up	Hddc2	240.681	1.61044	0.593533	2.71331	0.00666142	0.0318176	Up	Lor	27.1023	8.08185	3.11552	2.59406	0.00948491	0.0544468	Up
Habp4	477.791	1.19962	0.563349	2.12945	0.0332173	0.114018	Up	Hdlbp	9763.46	0.537463	0.128374	4.18669	2.83048e-05	0.000283232	Up	Lpar1	69.9071	6.35804	1.87646	3.38832	0.000703234	0.00633576	Up
Hadh	1391.54	1.28744	0.353493	3.64206	0.000270461	0.00198657	Up	Heatr3	666.89	0.874056	0.38278	2.28344	0.0224043	0.0843109	Up	Lpcat1	672.351	1.16964	0.522419	2.23889	0.0251632	0.117525	Up
Hadha	3132.02	0.490979	0.210212	2.33563	0.0195105	0.075394	Up	Hectd1	10106.2	0.618775	0.11519	5.37179	7.79568e-08	1.2837e-06	Up	Lpcat3	1766.98	2.06078	0.427243	4.82344	1.41101e-06	2.6855e-05	Up
Hadhb	2113.56	0.748837	0.221353	3.38299	0.000717004	0.00467377	Up	Hecw1	155.7	3.97396	1.81185	2.19331	0.028285	0.101051	Up	Lphn3	1957.82	9.65672	0.621685	15.5331	2.06991e-54	6.56593e-52	Up
Hapln1	78.3032	9.39076	2.19898	4.27052	1.95021e-05	0.000187782	Up	Hepacam	63.2501	7.79726	2.08189	3.74528	0.000180191	0.00146036	Up	Lpin1	337.179	1.85936	0.709776	2.61965	0.00880202	0.0513734	Up
Hapln3	122.497	10.0367	1.78792	5.61366	1.98091e-08	3.33633e-07	Up	Herc3	661.811	1.80976	0.659842	2.74272	0.00609329	0.0296715	Up	Lrfn3	21.5141	7.74895	3.32026	2.33384	0.0196042	0.0961357	Up
Hapln4	112.836	4.64668	1.87443	2.47899	0.0131757	0.0548534	Up	Hexb	728.6	0.907585	0.338615	2.68029	0.00735587	0.034387	Up	Lrfn5	138.045	10.4306	2.29094	4.55299	5.28892e-06	8.62196e-05	Up
Hax1	984.111	0.613846	0.308615	1.98904	0.046697	0.148566	Up	Hgsnat	655.143	1.04902	0.334909	3.13225	0.00173472	0.0103211	Up	Lrig1	599.943	1.48084	0.462102	3.20457	0.00135265	0.0110077	Up
Hbs1l	884.473	1.11816	0.34985	3.19612	0.00139289	0.00827286	Up	Hhatl	27.7211	8.03749	2.39951	3.34964	0.000809167	0.00534696	Up	Lrp1	752.486	2.66073	0.960534	2.77005	0.0056047	0.0357209	Up
Hbxip	861.23	1.16392	0.498164	2.33642	0.0194695	0.0752545	Up	Hic1	712.641	2.14541	0.380043	5.64518	1.65009e-08	2.99273e-07	Up	Lrp1b	80.9437	9.66037	2.41109	4.00664	6.15874e-05	0.000766746	Up
Hcn1	227.755	9.45768	1.86444	5.07267	3.92275e-07	5.39689e-06	Up	Hif1a	3518.38	0.356473	0.169969	2.09728	0.0359685	0.121049	Up	Lrp8	13878	7.89844	0.25789	30.6272	5.326e-206	1.62187e-202	Up
Hcn2	158.327	3.09555	0.903722	3.42533	0.000614048	0.00408871	Up	Higd2a	292.019	1.00139	0.492246	2.03433	0.0419184	0.136043	Up	Lrrc14b	32.9786	8.36549	2.83855	2.9471	0.00320774	0.0227274	Up
Hdac11	66.4166	9.15327	2.62455	3.48756	0.000487455	0.00334409	Up	Hipk3	6439.4	0.372862	0.173316	2.15134	0.031449	0.109626	Up	Lrrc16b	24.3262	6.48426	3.21014	2.01993	0.0433902	0.174027	Up
Hdac2	2113.27	0.644926	0.274019	2.35358	0.0185936	0.0727024	Up	Hist3h2ba	21.7128	6.17824	2.56321	2.41035	0.0159371	0.064351	Up	Lrrc4b	41.0696	8.68155	2.71108	3.20225	0.00136358	0.0110848	Up
Hdac6	334.623	1.4759	0.519853	2.83906	0.00452461	0.0226082	Up	Hlf	190.538	2.0867	0.959805	2.17409	0.0296987	0.104715	Up	Lrrc4c	108.814	8.65253	2.18803	3.95448	7.67005e-05	0.000927594	Up
Hdgf	3635.4	0.834946	0.177525	4.70325	2.56054e-06	2.98664e-05	Up	Hmg20a	1196.01	0.518205	0.261189	1.98402	0.0472535	0.149354	Up	Lrrc55	2199.76	3.6841	0.424539	8.67788	4.03229e-18	3.46868e-16	Up
Hdlbp	9317.87	0.325215	0.14387	2.26048	0.0237916	0.0878651	Up	Hmga1-rs1	396.287	2.12054	0.615776	3.44368	0.000573852	0.00399721	Up	Lrrc57	579.341	0.978511	0.490128	1.99644	0.0458863	0.181424	Up
Hectd1	8251.45	0.990757	0.135878	7.2915	3.06523e-13	9.0145e-12	Up	Hmgcs2	3329.31	8.52462	2.57706	3.30789	0.000940024	0.00610486	Up	Lrrc58	16450.5	0.638932	0.222921	2.86619	0.00415451	0.0281516	Up
Hepacam	56.9483	8.93128	2.426	3.68148	0.000231884	0.00173001	Up	Hmox1	365.768	1.39468	0.622755	2.23954	0.0251211	0.0919472	Up	Lrrc7	23.4226	7.87217	3.27391	2.40452	0.0161939	0.0831879	Up
Hes5	21.4088	7.52002	2.93755	2.55996	0.0104685	0.0455838	Up	Hnmt	26.4982	7.97204	2.75968	2.88875	0.00386771	0.0202325	Up	Lrrfip1	2410.18	0.838575	0.330901	2.53422	0.0112698	0.0626713	Up
Hey1	692.281	2.98313	0.480329	6.2106	5.27821e-10	1.11091e-08	Up	Homer1	565.722	1.817	0.401416	4.52648	5.99729e-06	6.93e-05	Up	Lrrn1	131.839	3.84637	1.92028	2.00303	0.0451744	0.179308	Up
Hhip	15.652	5.50543	2.80802	1.96061	0.0499242	0.156206	Up	Hook1	47.0224	6.40126	1.76731	3.62204	0.000292292	0.00222767	Up	Lrrtm3	21.723	7.76332	3.31807	2.33971	0.0192989	0.0951262	Up
Hint3	81.3201	2.66877	1.28076	2.08374	0.0371841	0.12459	Up	Hook3	6407.57	0.371239	0.159488	2.3277	0.019928	0.0766422	Up	Lrtm2	46.3593	8.85639	3.9573	2.23799	0.0252217	0.117655	Up
Hip1	6772.8	0.636312	0.143661	4.42925	9.45622e-06	9.76178e-05	Up	Hoxd8	20.5978	7.60899	2.62957	2.89362	0.00380823	0.0199559	Up	Lsamp	55.5362	9.11682	2.72102	3.35052	0.000806613	0.00710923	Up
Hip1r	431.741	2.73125	0.761504	3.58665	0.000334956	0.00239311	Up	Hpca	205.332	6.56985	1.46015	4.49945	6.813e-06	7.78483e-05	Up	Lsr	3411.37	4.88679	0.284853	17.1555	5.72081e-66	2.63955e-63	Up
Hira	1016.19	0.664129	0.310609	2.13815	0.0325045	0.112155	Up	Hprt	2225.68	1.12504	0.247482	4.54596	5.4686e-06	6.37537e-05	Up	Luzp2	262.117	11.3557	1.8956	5.99057	2.09111e-09	6.86189e-08	Up
Hist1h2ah	17.8767	7.26003	3.11015	2.3343	0.01958	0.0755855	Up	Hps3	739.202	0.992396	0.352071	2.81874	0.00482132	0.024344	Up	Ly75	5131.68	6.85218	1.00039	6.84948	7.41183e-12	3.49389e-10	Up
Hist1h3c	25.4742	3.74655	1.87314	2.00014	0.045485	0.145374	Up	Hrasls	17.6633	7.38743	2.74276	2.69343	0.00707208	0.0332727	Up	Lynx1	619.007	2.68584	0.934489	2.87412	0.00405149	0.0276009	Up
Hist1h3i	36.2286	8.27931	2.42973	3.4075	0.0006556	0.00432742	Up	Hrct1	40.5377	7.11077	2.00463	3.54717	0.00038939	0.00285862	Up	Lypd1	85.546	4.25317	1.98191	2.146	0.0318733	0.139415	Up
Hist3h2ba	19.3561	7.3742	3.27898	2.24893	0.0245168	0.0898221	Up	Hrsp12	100.065	2.32094	0.987327	2.35073	0.0187365	0.0730463	Up	Lysmd1	356.53	1.25864	0.631151	1.99419	0.0461309	0.18198	Up
Hivep1	2376.96	0.578812	0.274453	2.10896	0.0349478	0.118722	Up	Hs6st2	146.56	2.36337	1.1057	2.13744	0.0325625	0.112488	Up	M6pr	4103.68	1.35711	0.292624	4.63775	3.5223e-06	6.05995e-05	Up
Hlf	139.313	10.222	1.96294	5.20752	1.91379e-07	2.77912e-06	Up	Hsd17b11	1935.03	1.27531	0.191965	6.64345	3.06418e-11	7.71311e-10	Up	Mab21l2	22.97	7.8431	3.33617	2.35093	0.0187264	0.0930576	Up
Hmcn1	10258	0.660023	0.197629	3.3397	0.000838685	0.00535425	Up	Hsd17b4	3079.55	0.620276	0.170895	3.62957	0.000283888	0.00217332	Up	Macf1	41145.4	0.352773	0.125603	2.80864	0.00497517	0.0324698	Up
Hmga1	122.555	10.0375	1.78193	5.63292	1.77179e-08	3.00748e-07	Up	Hsf4	53.3032	2.64439	1.28263	2.06169	0.0392368	0.129623	Up	Madcam1	179.405	4.32913	1.47196	2.94106	0.00327087	0.0230887	Up
Hmgb3	933.652	0.892426	0.345126	2.5858	0.00971541	0.0427776	Up	Hspa12a	506.541	2.76094	0.992158	2.78276	0.00538991	0.0267064	Up	Madd	940.529	1.17547	0.571497	2.05682	0.0397037	0.162951	Up
Hmgcll1	30.5039	8.03078	2.61746	3.06815	0.00215385	0.0119944	Up	Hspa12b	3833.81	0.536181	0.163706	3.27526	0.00105565	0.0067453	Up	Mag	74.3481	9.5378	2.29699	4.1523	3.29144e-05	0.000438455	Up
Hmgcr	1215.92	0.935157	0.394379	2.37121	0.0177298	0.0699192	Up	Hspa13	1196.11	0.59973	0.267541	2.24164	0.0249848	0.091601	Up	Mageh1	610.201	1.82806	0.7252	2.52077	0.0117098	0.0646223	Up
Hmgcs1	2897.05	1.14953	0.236204	4.86668	1.13491e-06	1.4105e-05	Up	Hspa9	4129.57	0.408999	0.15287	2.67546	0.00746265	0.0348121	Up	Magi1	1954.29	1.06568	0.31481	3.38516	0.000711359	0.00640139	Up
Hmgcs2	2992.45	7.40955	2.78256	2.66285	0.00774813	0.0354471	Up	Hspb1	643.753	0.736226	0.369692	1.99146	0.0464306	0.147268	Up	Mal	1109.83	1.32526	0.473927	2.79634	0.00516844	0.0335299	Up
Hmgn1	4583.27	0.744195	0.183204	4.06212	4.8629e-05	0.000430289	Up	Hspe1	1730.93	0.57535	0.282493	2.03669	0.041681	0.135673	Up	Mamld1	734.532	2.22582	0.479759	4.63945	3.49343e-06	6.01708e-05	Up
Hnmt	23.9765	7.68307	3.13414	2.45141	0.0142296	0.0586136	Up	Htr1b	27.1494	8.00745	3.72018	2.15243	0.0313632	0.10943	Up	Man2a1	3182.24	0.791955	0.277899	2.84979	0.00437474	0.0293824	Up
Hnrnpab	9943.67	0.523274	0.131839	3.96904	7.21629e-05	0.000613486	Up	Htr2c	78.0563	9.53093	2.06453	4.61651	3.90247e-06	4.73718e-05	Up	Maneal	61.4012	3.79779	1.79613	2.11443	0.0344787	0.147672	Up
Hnrnpf	12088.2	0.379327	0.156194	2.42856	0.0151587	0.0614925	Up	Htr5a	24.7468	7.87375	3.80126	2.07135	0.0383261	0.127505	Up	Maoa	6514.54	2.20447	0.228802	9.63482	5.69928e-22	5.98464e-20	Up
Hnrnpr	3494.12	0.447492	0.212797	2.1029	0.0354744	0.120108	Up	Htra1	1352.71	1.25266	0.293729	4.26467	2.00195e-05	0.000205815	Up	Maob	72.6367	9.50464	2.19532	4.32951	1.49441e-05	0.000217949	Up
Homer1	492.735	2.00673	0.526235	3.81337	0.000137084	0.0010928	Up	Htra3	2483.99	8.5836	1.61221	5.32413	1.01437e-07	1.64221e-06	Up	Map4k2	1714.4	1.38755	0.379771	3.65365	0.000258538	0.00270364	Up
Hook1	41.508	8.47603	2.4018	3.52903	0.000417092	0.00290738	Up	Hunk	357.652	1.5431	0.469994	3.28323	0.00102625	0.00659254	Up	Mapk6	3911.82	1.13695	0.263732	4.31099	1.62523e-05	0.00023519	Up
Hopx	198.058	8.33864	1.31293	6.35118	2.13667e-10	4.71964e-09	Up	Ica1l	200.645	2.05178	0.719796	2.8505	0.0043651	0.0223859	Up	Mapk8ip1	283.141	2.77258	0.985057	2.81464	0.00488321	0.0319793	Up
Hoxd8	18.5435	7.31267	3.09835	2.36018	0.018266	0.0716429	Up	Icmt	1944.26	0.65713	0.300582	2.18619	0.0288018	0.102425	Up	Mapk8ip2	156.654	9.18022	2.28333	4.02055	5.80631e-05	0.000725241	Up
Hpca	184.037	9.14729	1.89635	4.82361	1.4098e-06	1.73088e-05	Up	Ide	1472.07	0.607929	0.279108	2.17811	0.0293979	0.103869	Up	Mapk9	1355.82	1.03053	0.403374	2.55476	0.010626	0.0596576	Up
Hprt	2089.96	0.922742	0.283749	3.25197	0.0011461	0.0070214	Up	Idh3a	1084.86	0.618097	0.291564	2.11994	0.0340114	0.116063	Up	Mapkap1	1194.47	0.955721	0.452565	2.11179	0.0347046	0.148347	Up
Hrasls	15.8819	7.08926	3.25462	2.17821	0.0293903	0.10324	Up	Idh3b	1883.67	0.476151	0.24224	1.96562	0.0493428	0.154059	Up	Mapkbp1	2909.92	1.15375	0.271564	4.24856	2.15149e-05	0.000298893	Up
Hrct1	35.9551	8.26873	2.47304	3.34355	0.000827128	0.00528491	Up	Ifltd1	69.0411	2.63051	1.18065	2.22803	0.0258788	0.0940979	Up	Mapt	747.459	4.34425	1.01956	4.26091	2.03597e-05	0.000284662	Up
Hrh3	45.2694	8.60037	3.67536	2.34001	0.0192834	0.0747255	Up	Ifnar1	7439.88	1.09024	0.146238	7.45522	8.97196e-14	2.80465e-12	Up	March4	108.56	5.67238	1.92153	2.952	0.00315719	0.0224318	Up
Hsd17b11	1883.02	0.908189	0.240247	3.78024	0.000156679	0.00122683	Up	Ifnar2	2152.3	1.16925	0.248651	4.70238	2.57149e-06	3.28212e-05	Up	March6	3911.43	0.800986	0.256338	3.12473	0.00177969	0.0139033	Up
Hsd17b12	1443.53	0.604917	0.301093	2.00907	0.04453	0.143105	Up	Ift88	422.174	0.877769	0.386098	2.27343	0.023	0.0860277	Up	Mark1	123.952	10.2752	2.13021	4.82358	1.41005e-06	2.6855e-05	Up
Hsd17b4	2601.22	0.852726	0.267468	3.18814	0.00143193	0.0084598	Up	Igdcc3	140.961	2.93855	0.716943	4.09872	4.15444e-05	0.000395391	Up	Marveld2	440.345	4.16257	1.30472	3.19038	0.00142083	0.0114706	Up
Hsf4	41.3162	8.46871	2.34191	3.61616	0.000299005	0.00216582	Up	Igf1r	18460.3	1.87915	0.152666	12.3089	8.11444e-35	6.97207e-33	Up	Mast4	3072.93	0.925778	0.294311	3.14558	0.00165756	0.0130902	Up
Hsp90aa1	7107.06	0.6723	0.271915	2.47246	0.0134185	0.0557116	Up	Igfbp3	286.137	3.90062	0.673959	5.78763	7.13863e-09	1.36388e-07	Up	Matk	56.948	7.67554	2.75763	2.78338	0.00537949	0.0345604	Up
Hsp90ab1	31077.7	0.358867	0.123074	2.91588	0.00354691	0.0183701	Up	Igfbp7	10843.4	1.94169	0.122625	15.8344	1.80216e-56	2.82829e-54	Up	Matn4	25.0486	7.9681	3.23189	2.46546	0.0136838	0.0730795	Up
Hspa12b	2680.79	1.65244	0.20821	7.93643	2.08082e-15	7.37767e-14	Up	Igsf1	26.2745	7.95987	2.9364	2.71076	0.00671299	0.0320242	Up	Max	1867.91	1.57803	0.420548	3.75232	0.000175208	0.00191784	Up
Hspa4	4820.66	0.459505	0.180485	2.54595	0.0108982	0.0471036	Up	Igsf11	28.328	6.63249	2.18575	3.03443	0.0024099	0.0136819	Up	Mbd5	1212.31	0.778795	0.373441	2.08546	0.0370276	0.155269	Up
Hspa8	58070.7	0.326719	0.0990573	3.29828	0.000972778	0.00610393	Up	Igsf21	21.3169	7.65818	2.70209	2.83417	0.00459448	0.0233829	Up	Mbp	788.47	3.12952	0.759412	4.12098	3.77261e-05	0.000493062	Up
Hspb1	425.652	2.48149	0.630098	3.93826	8.20756e-05	0.000690026	Up	Igsf5	448.666	6.09654	0.640151	9.5236	1.67286e-21	8.51942e-20	Up	Mcf2	35.8598	8.48627	2.75393	3.08152	0.00205947	0.0157023	Up
Hspb8	15.7518	5.51539	2.79528	1.97311	0.0484831	0.152546	Up	Igsf9b	45.6527	8.75699	2.30255	3.80317	0.000142858	0.00118893	Up	Mcf2l	4846.39	2.6683	0.199635	13.3659	9.57243e-41	1.99657e-38	Up
Htr2a	64.0649	9.10179	2.05565	4.42769	9.52467e-06	9.82486e-05	Up	Il10rb	810.4	0.919054	0.333052	2.75949	0.00578909	0.0284007	Up	Mdga1	126.714	7.89328	1.80261	4.37882	1.19325e-05	0.000179176	Up
Htr2c	70.5319	9.23995	2.26173	4.08534	4.4012e-05	0.00039218	Up	Il11ra1	1043.55	3.32538	0.290538	11.4456	2.47339e-30	1.84664e-28	Up	Mdga2	383.422	6.61138	0.94054	7.02934	2.07508e-12	1.0567e-10	Up
Htra3	2227.04	8.10745	0.534485	15.1687	5.69863e-52	7.86152e-50	Up	Il13ra1	995.236	0.654571	0.318337	2.05622	0.0397611	0.13106	Up	Mecp2	2078.05	0.733789	0.276446	2.65437	0.00794576	0.047444	Up
Hunk	265.873	3.13969	0.826025	3.80097	0.000144131	0.00114333	Up	Il13ra2	15.6588	5.77113	2.69635	2.14035	0.0323268	0.111903	Up	Med12l	91.8289	4.97039	2.05228	2.42189	0.0154399	0.0800982	Up
Hyou1	2378.96	0.860768	0.243314	3.53768	0.000403655	0.0028254	Up	Il1r1	1319.95	1.12616	0.271491	4.14806	3.35304e-05	0.00032826	Up	Med27	214.812	1.9502	0.84675	2.30316	0.0212699	0.102713	Up
Iars	2031.47	0.748237	0.233812	3.20017	0.00137347	0.00818125	Up	Il1rapl1	21.7146	7.6854	2.55469	3.00835	0.00262666	0.0147277	Up	Meg3	1628.26	4.13596	0.813082	5.08676	3.64224e-07	8.02559e-06	Up
Ica1l	190.538	1.6757	0.794065	2.11028	0.0348344	0.118411	Up	Il1rapl2	11.0056	6.70606	3.28658	2.04044	0.0413068	0.134768	Up	Megf6	2308.86	4.22058	0.496991	8.49227	2.02638e-17	1.61538e-15	Up
Ick	1017.7	0.71426	0.316228	2.25868	0.023903	0.0881906	Up	Il2rg	3765.62	0.642553	0.213735	3.0063	0.00264446	0.0148167	Up	Mfap3l	645.008	2.85455	0.789058	3.61767	0.000297272	0.00305416	Up
Icmt	1530.19	1.21425	0.354634	3.42395	0.000617171	0.00410771	Up	Ildr2	6468.77	4.87085	0.141612	34.3958	2.918e-259	6.41127e-256	Up	Mfap4	94.6635	6.8017	1.77345	3.83529	0.000125414	0.00142717	Up
Idh3a	812.117	1.3995	0.439841	3.18185	0.0014634	0.00862076	Up	Immt	2075.76	0.434597	0.190427	2.28223	0.0224759	0.0845009	Up	Mfhas1	1964.85	1.32461	0.413707	3.2018	0.00136571	0.0110941	Up
Idh3g	692.048	0.878886	0.371117	2.36822	0.017874	0.0703299	Up	Impad1	2775.88	0.561819	0.165824	3.38805	0.000703915	0.0047421	Up	Mfn2	1277.18	1.02081	0.398542	2.56136	0.0104264	0.0587104	Up
Idi1	753.535	1.15915	0.418946	2.76683	0.00566039	0.0272687	Up	Ina	234.553	11.1188	3.2761	3.39391	0.000689032	0.00465816	Up	Mfng	2167.42	0.893964	0.398673	2.24235	0.024939	0.116694	Up
Ids	1010.5	0.970278	0.480701	2.01846	0.0435429	0.140971	Up	Inadl	148.47	2.21491	0.666455	3.32342	0.000889195	0.00580558	Up	Mfsd2a	13011.6	12.2856	1.97169	6.23101	4.63428e-10	1.70438e-08	Up
Ifltd1	53.4402	8.83982	2.19426	4.02861	5.61078e-05	0.000488099	Up	Inpp1	490.865	1.5348	0.434271	3.5342	0.000409011	0.00297991	Up	Mfsd7c	2064.3	8.16906	0.499137	16.3664	3.32469e-60	1.29799e-57	Up
Ifnar1	6768.74	1.02374	0.165417	6.18883	6.06106e-10	1.26864e-08	Up	Inpp4a	885.356	1.77408	0.591613	2.99872	0.00271113	0.0151241	Up	Mgat4a	982.906	3.05158	0.446876	6.82869	8.56946e-12	4.00241e-10	Up
Ifnar2	2025.29	0.953207	0.233254	4.08657	4.37799e-05	0.00039034	Up	Inpp5f	1553.98	0.971999	0.287198	3.38442	0.00071329	0.00479475	Up	Mgat4c	102.084	9.99517	2.26511	4.41267	1.02103e-05	0.000156086	Up
Ift57	215.991	2.4054	0.823246	2.92185	0.0034796	0.0180832	Up	Inpp5j	30.0325	8.15308	3.63735	2.24149	0.0249945	0.0916147	Up	Mgat5b	37.9336	8.56729	2.70199	3.17073	0.00152056	0.0121712	Up
Igdcc3	121.268	3.57037	1.70081	2.09922	0.0357975	0.120959	Up	Insc	20.9259	7.63224	2.57369	2.96549	0.00302202	0.0165463	Up	Mgea5	5228.17	0.546403	0.237424	2.30138	0.0213701	0.103066	Up
Igdcc4	65.0289	9.12277	2.53817	3.59424	0.000325342	0.0023321	Up	Insig2	878.798	1.05549	0.308497	3.4214	0.000622988	0.00427939	Up	Mia3	4590.98	0.502734	0.205501	2.44638	0.0144299	0.076103	Up
Igf1r	15056	2.66856	0.18993	14.0502	7.68057e-45	9.10568e-43	Up	Insm1	97.2427	5.26373	1.17452	4.48161	7.40838e-06	8.42758e-05	Up	Miat	158.385	8.20668	1.49472	5.49046	4.00882e-08	1.07462e-06	Up
Igfbp2	99.1933	4.11095	1.85924	2.2111	0.0270289	0.0972184	Up	Insr	6102.4	2.00486	0.166572	12.036	2.29796e-33	1.93129e-31	Up	Mif4gd	607.131	1.48674	0.571782	2.60019	0.00931719	0.0537565	Up
Igfbp3	296.428	2.10299	0.56205	3.74165	0.000182819	0.00140572	Up	Ipo11	1864.58	0.423679	0.198059	2.13916	0.0324231	0.11211	Up	Mink1	3117.03	0.730279	0.230199	3.17239	0.00151192	0.0121224	Up
Igfbp6	25.4622	7.77015	2.77383	2.80123	0.00509081	0.0249687	Up	Ipw	54.5638	6.50384	1.62979	3.99061	6.59038e-05	0.000597642	Up	Mkl2	4931.46	1.20567	0.209473	5.75574	8.62649e-09	2.59579e-07	Up
Igfbpl1	30.9711	8.05266	2.62245	3.07066	0.00213588	0.0119118	Up	Iqcg	649.703	0.97661	0.366671	2.66345	0.00773442	0.035884	Up	Mknk1	616.965	2.31173	0.479253	4.82361	1.40984e-06	2.6855e-05	Up
Iglon5	116.011	8.55409	2.57241	3.32532	0.000883161	0.00561221	Up	Iqgap2	425.875	1.69395	0.532	3.18411	0.00145199	0.00887937	Up	Mks1	43.9945	4.53128	2.2711	1.99519	0.046022	0.181831	Up
Igsf1	23.7908	7.67188	3.30593	2.32064	0.0203064	0.0777757	Up	Iqsec1	3845.51	0.741393	0.158016	4.6919	2.7068e-06	3.43413e-05	Up	Mlc1	127.384	4.75629	1.82414	2.60742	0.00912269	0.0528708	Up
Igsf11	25.5517	6.35687	2.45114	2.59343	0.00950228	0.0420277	Up	Iqsec3	134.93	4.8639	1.2208	3.98419	6.77107e-05	0.000610786	Up	Mlec	1285.76	1.0225	0.360815	2.83386	0.00459895	0.0305646	Up
Igsf21	19.2424	7.3658	3.14603	2.3413	0.0192168	0.0745627	Up	Irak1	2189.03	0.675335	0.26808	2.51915	0.0117638	0.0503413	Up	Mlf2	3287.16	0.581622	0.273642	2.12548	0.0335463	0.144655	Up
Igsf5	395.366	11.7276	1.5984	7.33708	2.18311e-13	6.47046e-12	Up	Irak1bp1	56.5835	2.85763	1.0899	2.62192	0.00874351	0.0397033	Up	Mllt11	1266.19	2.24165	0.727797	3.08005	0.00206964	0.0157322	Up
Igsf9b	41.2601	8.46632	2.58149	3.27962	0.00103947	0.00646474	Up	Irf5	34.8427	8.3672	2.30602	3.62842	0.000285162	0.0021809	Up	Mllt4	9090.5	0.534811	0.223828	2.38938	0.0168767	0.0859702	Up
Ikzf4	41.9992	4.49378	2.03863	2.20431	0.0275024	0.0985209	Up	Islr2	438.831	4.65053	1.10042	4.22614	2.37735e-05	0.000240392	Up	Mlycd	316.355	1.74443	0.712952	2.44676	0.0144146	0.0760487	Up
Ikzf5	601.263	0.864871	0.42375	2.04099	0.0412514	0.135057	Up	Ism1	382.726	1.46414	0.498128	2.93929	0.00328967	0.0177402	Up	Mmd	1670.34	0.850018	0.323621	2.62658	0.00862467	0.0506438	Up
Il11ra1	1204.17	1.26635	0.369117	3.43076	0.000601895	0.00401661	Up	Isyna1	2781.75	3.12908	0.28599	10.9412	7.31884e-28	4.91545e-26	Up	Mmd2	117.451	10.1976	2.02939	5.02493	5.03618e-07	1.05913e-05	Up
Il17rd	702.578	1.47271	0.370508	3.97484	7.04261e-05	0.000599728	Up	Itga1	5173.04	0.527641	0.192959	2.73447	0.00624801	0.0302564	Up	Mmp25	1052.82	2.62041	0.412696	6.34949	2.16032e-10	8.4341e-09	Up
Il1rap	185.699	1.90129	0.818329	2.32338	0.0201589	0.0773479	Up	Itga11	30.2727	8.16458	3.63104	2.24855	0.0245412	0.0904501	Up	Mmrn1	1181.55	4.48198	1.90011	2.35881	0.0183337	0.0917058	Up
Il2rg	3093.23	0.99012	0.26772	3.69834	0.000217018	0.00163518	Up	Itga4	4595.3	2.64812	0.177939	14.8822	4.30397e-50	5.70647e-48	Up	Moap1	47.8915	8.90414	2.75369	3.23353	0.0012227	0.0101179	Up
Ildr2	5617.9	9.54431	1.65263	5.77521	7.68579e-09	1.39345e-07	Up	Itgb8	69.1612	5.46679	1.75634	3.1126	0.00185444	0.0109152	Up	Mob3b	229.686	4.68821	0.94569	4.95745	7.14239e-07	1.45388e-05	Up
Impdh1	1985.68	0.814977	0.274219	2.97199	0.00295878	0.0156991	Up	Itih2	36.9684	6.95312	2.62336	2.65046	0.00803826	0.03707	Up	Mobp	224.306	9.69424	1.82935	5.29928	1.16259e-07	2.85971e-06	Up
Ina	212.604	9.35129	1.96071	4.76935	1.84822e-06	2.22593e-05	Up	Itih5	570.02	2.72831	0.571314	4.77551	1.79253e-06	2.36441e-05	Up	Mog	40.0171	8.64449	2.65132	3.26044	0.00111239	0.00933181	Up
Inadl	111.309	5.88323	1.0962	5.36694	8.00832e-08	1.23377e-06	Up	Itm2a	15679.9	6.23406	0.140035	44.518	0	0	Up	Morn3	39.5026	8.62632	2.84482	3.03229	0.00242709	0.0179654	Up
Ing1	1438.75	0.762774	0.27544	2.7693	0.00561776	0.0271293	Up	Itm2c	5208.37	0.615947	0.189941	3.24283	0.00118347	0.00744449	Up	Mosc2	2263.1	1.00478	0.405517	2.47777	0.0132207	0.0711554	Up
Inpp1	455.534	1.36213	0.523599	2.60147	0.00928246	0.041272	Up	Itpka	99.6257	6.18576	1.65676	3.73365	0.000188722	0.00152205	Up	Mospd1	1121.68	2.08134	0.349851	5.94921	2.69437e-09	8.74724e-08	Up
Inpp4a	827.441	1.55648	0.684086	2.27528	0.0228894	0.0854445	Up	Itpr1	16128.6	3.75092	1.11802	3.35497	0.000793732	0.00526189	Up	Mpp2	147.753	5.64226	1.28946	4.37569	1.21049e-05	0.000181406	Up
Inpp5f	1237.36	1.55827	0.307968	5.05986	4.19569e-07	5.736e-06	Up	Itpr2	2629.2	0.587232	0.207018	2.83662	0.00455942	0.0232352	Up	Mpp5	2607.05	0.509423	0.241999	2.10506	0.0352858	0.150241	Up
Insc	18.7832	7.33151	3.04795	2.40539	0.0161551	0.0646842	Up	Jag1	2714.71	0.778135	0.165101	4.71307	2.44008e-06	3.12998e-05	Up	Mprip	14532	0.498086	0.186049	2.67717	0.00742471	0.0448962	Up
Insm1	88.3337	4.84622	1.21438	3.9907	6.58781e-05	0.000564164	Up	Jagn1	340.851	1.07593	0.430195	2.50102	0.0123835	0.0524965	Up	Mpzl1	8871.25	1.23366	0.164707	7.49002	6.88654e-14	4.14445e-12	Up
Insr	5584.6	1.85959	0.179437	10.3635	3.63516e-25	2.29848e-23	Up	Jak2	3410.27	1.54216	0.171802	8.97641	2.79753e-19	1.24353e-17	Up	Mrc2	60.9359	7.77408	2.73431	2.84315	0.00446694	0.0298699	Up
Ipo5	3865.22	0.495641	0.185656	2.66967	0.00759252	0.0347981	Up	Jak3	1515.52	0.928079	0.213283	4.3514	1.35274e-05	0.000144882	Up	Mro	21.8532	6.32685	2.83485	2.23181	0.0256277	0.118911	Up
Ipo7	2621.95	0.770978	0.227365	3.39092	0.00069659	0.00455244	Up	Jakmip1	24.9887	7.8874	2.68233	2.94051	0.00327677	0.0176893	Up	Mrps31	158.255	2.21695	1.10116	2.0133	0.0440835	0.176265	Up
Iqgap1	8674.03	0.575455	0.182771	3.1485	0.00164109	0.00953425	Up	Jakmip2	108.24	10.0028	2.19165	4.56403	5.01804e-06	5.90945e-05	Up	Msi2	4198.78	0.504492	0.227709	2.21551	0.026725	0.122454	Up
Iqsec3	120.517	5.49237	1.49956	3.66266	0.00024961	0.00184772	Up	Jam2	4268.87	1.11487	0.201773	5.52534	3.28854e-08	5.70211e-07	Up	Msrb2	132.618	4.91017	1.13026	4.34429	1.39729e-05	0.000205359	Up
Irak1bp1	47.0361	4.25898	1.58891	2.68044	0.00735254	0.0338927	Up	Jarid2	2157.74	0.792685	0.203779	3.88993	0.000100273	0.000872776	Up	Msrb3	4042.38	0.748897	0.215556	3.47425	0.000512282	0.00485075	Up
Irs1	138.489	3.45054	1.37306	2.51303	0.0119698	0.05088	Up	Jmy	4152.1	1.02492	0.194078	5.28096	1.28505e-07	2.02917e-06	Up	Mt2	34.2008	6.9407	2.47241	2.80726	0.00499647	0.0325529	Up
Islr	61.1734	9.03455	2.302	3.92466	8.68539e-05	0.000726576	Up	Jph1	91.6593	3.6025	1.21104	2.97471	0.00293263	0.0161689	Up	Mtap2	288.554	2.82143	1.23194	2.29023	0.0220082	0.105576	Up
Islr2	419.039	3.3594	1.12306	2.99129	0.00277803	0.0148911	Up	Jph3	51.618	5.8544	1.78317	3.28313	0.0010266	0.00659254	Up	Mtap7d2	274.781	9.99045	2.09806	4.76176	1.9191e-06	3.53328e-05	Up
Ism1	251.312	11.0739	1.64021	6.75148	1.46346e-11	3.65263e-10	Up	Jph4	124.257	4.56192	1.53814	2.96587	0.00301826	0.0165375	Up	Mtap9	282.081	2.93134	1.1118	2.63657	0.00837492	0.0495787	Up
Isoc1	551.799	1.65455	0.569663	2.90445	0.00367905	0.0189574	Up	Kank1	1140.77	2.02184	0.250972	8.05602	7.88176e-16	2.82568e-14	Up	Mterfd2	249.066	1.42876	0.698676	2.04495	0.0408598	0.166407	Up
Isyna1	2286.19	5.51916	2.23145	2.47336	0.013385	0.0556181	Up	Kank3	4141.8	0.652233	0.227323	2.86919	0.0041152	0.0213319	Up	Mterfd3	27.4739	4.22772	2.08134	2.03124	0.0422303	0.170557	Up
Itga1	3796.74	1.37499	0.23359	5.88636	3.94782e-09	7.40522e-08	Up	Kank4	1104.58	2.5235	0.338052	7.46483	8.34064e-14	2.61794e-12	Up	Mtfp1	40.3775	8.65705	4.0932	2.11499	0.0344311	0.147592	Up
Itga3	248.443	2.59334	0.985066	2.63266	0.00847185	0.0381881	Up	Kbtbd11	3244.09	6.4793	0.234025	27.6863	1.02037e-168	8.25966e-166	Up	Mtif2	542.871	1.0036	0.499467	2.00934	0.0445013	0.177376	Up
Itga4	4053.77	2.8242	0.286185	9.86845	5.7038e-23	3.24177e-21	Up	Kcna1	258.709	11.26	1.82038	6.18551	6.19029e-10	1.33905e-08	Up	Mtmr6	3367.37	1.38142	0.295332	4.67751	2.90376e-06	5.11129e-05	Up
Itga7	55.1355	8.88493	2.16207	4.10945	3.96601e-05	0.000358667	Up	Kcna5	162.315	6.84051	0.983012	6.95872	3.43367e-12	9.48113e-11	Up	Mtmr7	94.3833	4.41254	1.60815	2.74386	0.00607212	0.038094	Up
Itgav	904.015	1.18162	0.375526	3.14657	0.00165198	0.00958656	Up	Kcna6	724.352	7.30096	0.602051	12.1268	7.61534e-34	6.47093e-32	Up	Mtpap	951.665	1.40266	0.523736	2.67819	0.00740218	0.0447777	Up
Itgb1	21585.4	0.561164	0.125442	4.47351	7.69462e-06	8.11438e-05	Up	Kcnab1	134.596	3.10554	1.39771	2.22187	0.026292	0.0953481	Up	Mtus1	4070.35	0.658973	0.21143	3.11674	0.00182863	0.0142422	Up
Itgb8	61.0875	9.03252	2.33307	3.87152	0.00010816	0.000884339	Up	Kcnab2	82.8746	5.3426	1.51439	3.5279	0.000418872	0.0030388	Up	Mvk	302.885	2.48644	0.685413	3.62765	0.000286007	0.00295037	Up
Itih5	466.087	4.29994	1.0252	4.19423	2.73805e-05	0.000256322	Up	Kcnc1	215.91	5.73326	1.34402	4.26576	1.99226e-05	0.000204957	Up	Mxi1	1177.69	1.08431	0.359341	3.01751	0.00254863	0.0187104	Up
Itm2a	13910.3	8.48315	0.237512	35.7167	2.17796e-279	3.67228e-276	Up	Kcnc3	598.506	2.78888	1.0315	2.70371	0.00685703	0.0324996	Up	Mxra7	268.408	1.3925	0.703374	1.97975	0.047732	0.186662	Up
Itpka	88.8957	9.57383	2.23365	4.28618	1.81771e-05	0.000176254	Up	Kcnd2	86.9095	9.686	2.13526	4.53622	5.72722e-06	6.64289e-05	Up	Mycl1	291.836	3.98502	1.45472	2.73936	0.00615585	0.0385557	Up
Itpr1	15360.2	2.92117	1.12594	2.59444	0.00947462	0.0419298	Up	Kcne1l	54.5798	3.88555	1.80614	2.1513	0.0314529	0.109626	Up	Myh10	38280.6	2.06649	0.192046	10.7604	5.29622e-27	7.0737e-25	Up
Jag1	2402.06	0.831247	0.254076	3.27165	0.00106923	0.00662808	Up	Kcnf1	18.8646	7.48229	2.69009	2.78142	0.0054121	0.0268078	Up	Myh14	42.6352	8.73541	2.80295	3.1165	0.0018301	0.0142422	Up
Jag2	1139.84	5.61306	0.481389	11.6601	2.03694e-31	1.60992e-29	Up	Kcng4	81.1777	4.34785	1.44589	3.00704	0.00263807	0.0147863	Up	Myl4	36.2534	8.50211	2.74898	3.09282	0.00198262	0.0152231	Up
Jagn1	289.033	1.34634	0.562768	2.39235	0.0167407	0.0666072	Up	Kcnip1	177.295	7.22259	1.54601	4.67176	2.98627e-06	3.73709e-05	Up	Myo10	18155.7	2.19755	0.137694	15.9597	2.43983e-57	8.25531e-55	Up
Jak2	3863.17	0.519132	0.217783	2.38372	0.0171389	0.0679954	Up	Kcnip3	67.3671	3.96807	1.3507	2.9378	0.00330555	0.0178072	Up	Myo15	17.9698	7.48939	3.54253	2.11414	0.0345036	0.147737	Up
Jakmip2	102.197	4.52152	1.77313	2.55002	0.0107717	0.0466495	Up	Kcnip4	72.0266	9.41519	2.71042	3.4737	0.000513336	0.00363045	Up	Myo16	185.431	10.8564	2.07527	5.23131	1.68317e-07	4.00437e-06	Up
Jkamp	1093.11	0.759852	0.383553	1.98108	0.0475818	0.150681	Up	Kcnj10	330.937	3.99216	0.793729	5.02963	4.91431e-07	7.11696e-06	Up	Myo1b	12530	1.62327	0.194014	8.36679	5.92079e-17	4.57614e-15	Up
Jmjd8	816.723	1.13591	0.348254	3.26173	0.00110733	0.00682799	Up	Kcnj11	13.3021	6.97792	3.08653	2.26077	0.0237737	0.0882973	Up	Myo1e	3782.94	0.942475	0.276198	3.41232	0.000644121	0.00588326	Up
Jmy	3256.6	1.70941	0.235245	7.26654	3.68821e-13	1.07015e-11	Up	Kcnj2	4627.64	4.98056	0.245925	20.2523	3.38886e-91	1.00232e-88	Up	Myrip	104.138	4.00684	1.21139	3.30763	0.000940903	0.00812142	Up
Jph3	47.2706	5.02335	2.19902	2.28436	0.0223507	0.0838495	Up	Kcnj3	44.4315	8.71797	2.62881	3.31632	0.000912128	0.00594178	Up	Myt1	50.7637	8.98784	2.46147	3.65141	0.000260807	0.0027199	Up
Jup	2889.42	1.245	0.272907	4.562	5.06698e-06	5.57588e-05	Up	Kcnj8	43.0986	4.0832	1.80666	2.26008	0.0238163	0.0883917	Up	Myt1l	113.151	8.70813	2.08691	4.17275	3.00949e-05	0.000406075	Up
Kank3	3230.21	1.23552	0.231215	5.34358	9.11303e-08	1.39058e-06	Up	Kcnj9	54.7792	9.02033	3.23486	2.78847	0.00529569	0.0262819	Up	Mzt2	149.062	2.13631	1.04419	2.0459	0.0407657	0.166184	Up
Kank4	855.64	6.04039	1.74846	3.45469	0.00055093	0.00370912	Up	Kcnk1	52.0026	4.54538	1.94022	2.34272	0.0191439	0.0742972	Up	N28178	46.428	8.85859	2.56321	3.45606	0.000548134	0.00513308	Up
Kars	1257.37	0.892102	0.419379	2.1272	0.0334037	0.114427	Up	Kcnk2	60.8072	6.66472	1.57788	4.22384	2.4018e-05	0.000242414	Up	Naa30	680.24	1.11828	0.51526	2.17033	0.0299822	0.133016	Up
Kat5	669.901	1.01674	0.493599	2.05985	0.039413	0.130275	Up	Kcnma1	510.758	6.30671	1.88417	3.3472	0.000816326	0.00539077	Up	Naalad2	41.8756	8.71035	2.68094	3.24899	0.00115815	0.00966243	Up
Kbtbd11	2889.64	7.7319	1.4895	5.19093	2.09251e-07	3.01556e-06	Up	Kcnn2	74.9395	5.28734	1.96019	2.69736	0.00698922	0.0329434	Up	Nacad	90.9426	9.82847	2.20194	4.46354	8.06169e-06	0.000125454	Up
Kcna1	234.224	9.50032	1.83465	5.17828	2.23937e-07	3.21804e-06	Up	Kcnq2	68.4608	9.34168	2.17771	4.28967	1.78938e-05	0.000185825	Up	Nacc2	807.982	1.87188	0.59666	3.13727	0.00170528	0.0134145	Up
Kcna5	146.936	5.6697	0.947943	5.98105	2.21697e-09	4.29465e-08	Up	Kcnq3	57.0294	9.07809	2.34329	3.87408	0.000107027	0.000922174	Up	Naip6	22.182	7.79313	3.27712	2.37804	0.0174049	0.0878961	Up
Kcna6	653.993	6.71285	2.47088	2.71678	0.00659204	0.0308747	Up	Kcnq4	106.468	3.44829	0.952839	3.61897	0.000295782	0.00225204	Up	Nalcn	200.227	10.9672	2.16439	5.06708	4.03957e-07	8.79921e-06	Up
Kcnb2	26.6497	6.27464	3.04598	2.05998	0.0394009	0.130263	Up	Kcnv1	20.5099	7.60246	2.75733	2.75719	0.00583011	0.0285837	Up	Nampt	18755.5	3.12521	0.942661	3.3153	0.000915435	0.00793307	Up
Kcnc1	199.352	4.68157	1.42968	3.27455	0.00105829	0.00656834	Up	Kcp	1242.76	6.34713	1.55566	4.08003	4.50296e-05	0.000425141	Up	Nap1l2	112.658	22.8539	3.30152	6.92225	4.44533e-12	2.19044e-10	Up
Kcnc3	473.115	11.9862	3.30624	3.62533	0.000288598	0.00210147	Up	Kctd12b	4460.11	0.914487	0.15817	5.78169	7.39546e-09	1.40944e-07	Up	Nap1l4	2594.29	0.880106	0.280288	3.14001	0.00168944	0.0133213	Up
Kcnc4	39.2334	8.39365	2.62802	3.1939	0.00140363	0.00832876	Up	Kctd17	1882.95	2.61674	0.272276	9.61063	7.21069e-22	3.75934e-20	Up	Nap1l5	251.401	9.861	2.00017	4.93008	8.21941e-07	1.64886e-05	Up
Kcnd2	78.9776	7.90369	2.1725	3.63807	0.000274693	0.00201375	Up	Kctd6	232.713	1.23871	0.573755	2.15895	0.030854	0.107988	Up	Napb	253.641	2.57442	1.11574	2.30737	0.0210344	0.101737	Up
Kcne1l	48.312	4.35971	1.98416	2.19726	0.0280016	0.0998555	Up	Kdelr1	2577.61	1.21264	0.17896	6.77602	1.2353e-11	3.22562e-10	Up	Napepld	370.977	2.86024	0.777126	3.68053	0.00023275	0.00245419	Up
Kcne4	23.2418	7.63818	3.05693	2.49864	0.0124669	0.0526246	Up	Kdr	48773.6	0.964626	0.106476	9.05953	1.31019e-19	5.96176e-18	Up	Naprt1	20.6671	7.6906	3.51404	2.18854	0.0286304	0.128706	Up
Kcnf1	16.9701	7.18483	3.18383	2.25666	0.0240291	0.0885268	Up	Kdsr	766.536	0.81301	0.352152	2.30869	0.0209609	0.0799353	Up	Nat8l	211.328	11.045	2.1814	5.06327	4.12133e-07	8.90089e-06	Up
Kcng4	69.9888	9.2288	2.38875	3.86344	0.000111802	0.000912151	Up	Kif1a	1378.58	6.62832	1.4368	4.61324	3.96447e-06	4.80107e-05	Up	Ncam1	1417.92	2.7201	0.978339	2.78032	0.00543049	0.0348293	Up
Kcnh2	26.6642	7.83655	2.78092	2.81797	0.00483281	0.023873	Up	Kif1b	7066.28	0.341631	0.145974	2.34035	0.0192657	0.0746553	Up	Ncam2	189.57	9.42845	2.09844	4.49308	7.0201e-06	0.000110765	Up
Kcnip1	159.408	10.4165	2.19954	4.73578	2.18213e-06	2.58702e-05	Up	Kif1c	8226.89	0.541533	0.148119	3.65608	0.000256106	0.00198034	Up	Ncan	1272.96	9.66504	2.16966	4.45463	8.40384e-06	0.000130302	Up
Kcnip3	57.2497	7.45128	1.97081	3.78083	0.000156309	0.0012252	Up	Kif21b	263.171	1.86733	0.936179	1.99463	0.0460835	0.14653	Up	Ncaph	1651.36	1.36671	0.415336	3.29061	0.000999694	0.00853693	Up
Kcnip4	65.2425	9.12762	2.93744	3.10734	0.00188777	0.0107131	Up	Kif3a	1640.96	1.09809	0.351279	3.12598	0.00177216	0.0105032	Up	Nckap1	6675.39	0.488921	0.186336	2.62388	0.00869356	0.05095	Up
Kcnj10	349.86	2.02759	0.830633	2.44101	0.0146461	0.0598102	Up	Kif3b	1271.05	0.65703	0.272162	2.41411	0.0157736	0.0637911	Up	Nckap5	106.785	5.64711	1.81315	3.11454	0.00184233	0.0142973	Up
Kcnj2	4581.47	2.82886	0.238444	11.8638	1.82481e-32	1.49684e-30	Up	Kif5a	751.665	6.87011	1.65999	4.13864	3.49376e-05	0.000338589	Up	Ncoa1	1840.68	1.38829	0.388474	3.5737	0.000351972	0.00353504	Up
Kcnj3	40.2317	8.42994	2.9068	2.90007	0.00373074	0.0191977	Up	Kif5b	11249.2	0.6641	0.102715	6.46549	1.00971e-10	2.40765e-09	Up	Ncoa4	3427.74	1.40981	0.321423	4.38614	1.1538e-05	0.00017463	Up
Kcnj9	49.6223	8.73283	3.60664	2.42132	0.0154642	0.062462	Up	Kif5c	1340.47	7.47855	1.20887	6.18642	6.15467e-10	1.33322e-08	Up	Ncrna00086	55.0675	9.10459	2.6897	3.38499	0.000711821	0.00640176	Up
Kcnk1	45.1098	8.59502	2.5644	3.35167	0.000803244	0.00514966	Up	Kif9	14.52	7.10411	3.07005	2.314	0.0206675	0.0790907	Up	Ndfip1	2921.4	1.38622	0.289266	4.79218	1.64975e-06	3.07832e-05	Up
Kcnk2	54.0513	8.85638	2.16006	4.10006	4.13041e-05	0.000370443	Up	Kifap3	1309.75	1.31129	0.397397	3.2997	0.000967869	0.00627036	Up	Ndrg4	1959.48	4.40656	1.49446	2.94859	0.00319223	0.0226385	Up
Kcnma1	456.682	11.9352	3.74106	3.19032	0.00142117	0.00840791	Up	Kifc2	190.989	2.55237	1.05223	2.42567	0.01528	0.0620952	Up	Ndufv1	1609.16	1.1136	0.312692	3.56133	0.000368985	0.00368163	Up
Kcnn2	66.167	9.14781	2.54444	3.59521	0.000324126	0.00232449	Up	Klc1	4796.36	0.38137	0.147112	2.59238	0.00953156	0.0425531	Up	Nebl	965.635	1.67188	0.436848	3.82714	0.000129641	0.00147087	Up
Kcnq2	61.9041	9.05168	2.39267	3.78308	0.000154899	0.00121524	Up	Klf12	675.485	2.63424	0.343969	7.65838	1.88288e-14	6.17455e-13	Up	Necab1	29.5253	8.20522	3.30049	2.48606	0.0129167	0.0698973	Up
Kcnq3	51.603	8.78908	2.584	3.40134	0.000670559	0.00441081	Up	Klf9	989.54	1.1502	0.357762	3.21498	0.00130455	0.00810008	Up	Necab2	86.9846	9.76428	2.20726	4.42371	9.70207e-06	0.000148644	Up
Kcnq4	88.5258	7.11742	1.56212	4.55625	5.20746e-06	5.70153e-05	Up	Klhdc5	685.488	0.776153	0.308655	2.51463	0.0119158	0.0508543	Up	Necap1	819.93	1.25785	0.530053	2.37307	0.0176408	0.0887638	Up
Kcp	1107.83	7.67101	0.706678	10.855	1.88741e-27	1.29015e-25	Up	Klhl2	1132.08	0.841192	0.241551	3.48246	0.000496837	0.00352949	Up	Nefh	540.937	5.05628	1.15262	4.38677	1.15047e-05	0.000174299	Up
Kctd12b	4582.6	0.406258	0.189395	2.14503	0.0319504	0.110544	Up	Klhl29	42.2916	4.21805	1.91684	2.20053	0.0277695	0.099649	Up	Nefl	836.945	10.6118	1.48263	7.15742	8.22084e-13	4.45447e-11	Up
Kctd13	59.8198	2.86299	1.18418	2.41769	0.0156193	0.0629876	Up	Klhl32	15.2225	7.17218	3.27964	2.18688	0.0287514	0.102289	Up	Nefm	1133.85	9.76	2.22871	4.37922	1.19102e-05	0.000179018	Up
Kctd15	22.0078	7.55964	2.96424	2.55028	0.0107636	0.046628	Up	Klhl4	1105.74	1.29545	0.26784	4.83666	1.3204e-06	1.77826e-05	Up	Negr1	180.08	9.37705	1.834	5.1129	3.17256e-07	7.06219e-06	Up
Kctd17	1961.65	1.50592	0.256544	5.87001	4.35757e-09	8.15366e-08	Up	Klhl6	1240.03	1.86763	0.308039	6.06299	1.33617e-09	2.82285e-08	Up	Nek4	143.223	2.23876	1.106	2.0242	0.0429493	0.172591	Up
Kctd7	110.856	4.08976	1.74292	2.3465	0.0189508	0.0737571	Up	Klhl9	2009.46	0.522398	0.20542	2.54307	0.0109882	0.0476723	Up	Nelf	1289.43	1.84432	0.437985	4.21092	2.54331e-05	0.000349184	Up
Kdm5b	2909.13	0.541866	0.230084	2.35508	0.0185185	0.0725396	Up	Klk1	35.8882	8.40977	2.35886	3.56519	0.000363599	0.00269501	Up	Nell1	156.535	9.20794	2.89476	3.1809	0.00146816	0.0118151	Up
Kif1a	1243.29	7.10976	0.938459	7.57599	3.56391e-14	1.13858e-12	Up	Klrg2	42.2684	2.88534	1.37269	2.10195	0.0355576	0.119955	Up	Nes	18489.1	0.480781	0.165368	2.90734	0.00364522	0.0252397	Up
Kif1b	5456.82	0.890569	0.18681	4.76725	1.86756e-06	2.24566e-05	Up	Krt222	289.713	4.02089	0.588231	6.83557	8.16811e-12	2.18479e-10	Up	Net1	5585.6	3.07748	0.200144	15.3764	2.35757e-53	7.17927e-51	Up
Kif1c	6716.61	0.897255	0.163371	5.49214	3.97092e-08	6.41051e-07	Up	Ksr2	54.1297	9.00277	2.30694	3.90246	9.52187e-05	0.000831609	Up	Neto1	42.0673	8.71611	3.3581	2.59555	0.00944406	0.0543239	Up
Kif21a	233.427	4.75635	1.61039	2.95355	0.00314142	0.0165066	Up	Kti12	384.176	1.14116	0.539041	2.11703	0.0342575	0.116722	Up	Neto2	511.252	2.23826	1.08061	2.07128	0.0383324	0.15873	Up
Kif2a	1992.75	0.627028	0.278321	2.25289	0.0242658	0.0892022	Up	L1cam	382.785	3.98835	0.922734	4.32232	1.54397e-05	0.000163317	Up	Neurl1a	113.997	10.1545	2.09321	4.85113	1.22757e-06	2.36596e-05	Up
Kif3c	456.491	1.53868	0.779489	1.97396	0.0483859	0.152398	Up	LOC626904	16.1389	7.25825	2.85936	2.53842	0.0111355	0.0480883	Up	Neurl2	69.1577	9.43373	2.22722	4.23565	2.27895e-05	0.000315448	Up
Kif5a	689.718	5.38761	2.13478	2.52373	0.0116117	0.049706	Up	Lair1	22.3657	7.7278	2.56057	3.018	0.00254453	0.0143351	Up	Neurod1	142.138	10.4732	1.85747	5.63841	1.71628e-08	4.92131e-07	Up
Kif5b	9420.39	0.935228	0.163571	5.71758	1.0805e-08	1.90436e-07	Up	Lama1	1820.05	2.00509	0.315367	6.35797	2.04434e-10	4.72811e-09	Up	Neurod2	59.2693	9.21075	2.46631	3.73463	0.000187994	0.00203296	Up
Kif5c	1205.02	10.7661	2.03637	5.28692	1.24393e-07	1.86528e-06	Up	Lama4	15918	2.0226	0.0977024	20.7016	3.34853e-95	1.05103e-92	Up	Nfasc	873.463	10.6675	1.3396	7.96321	1.67635e-15	1.14973e-13	Up
Kifap3	1211.25	1.1778	0.470394	2.50386	0.0122847	0.05192	Up	Lamb1	7966.5	1.54378	0.202755	7.61403	2.65672e-14	8.58412e-13	Up	Nfia	7219.28	1.2771	0.264663	4.82538	1.39734e-06	2.67286e-05	Up
Kifc2	152.539	4.87339	1.24116	3.92649	8.61952e-05	0.000721861	Up	Lamb2	4421.55	0.297301	0.137903	2.15587	0.0310937	0.108637	Up	Nfkb1	3528.03	0.759377	0.222437	3.4139	0.00064041	0.00586696	Up
Kitl	3462.87	4.50226	0.282997	15.9092	5.47063e-57	8.92654e-55	Up	Lamc1	21577.5	0.343917	0.123251	2.79038	0.00526458	0.0261952	Up	Ngfr	401.201	4.30413	1.31591	3.27084	0.00107229	0.00905529	Up
Klf11	615.912	1.07542	0.441998	2.43309	0.0149708	0.0609229	Up	Lamtor3	1032.32	0.692706	0.259347	2.67096	0.00756339	0.0352073	Up	Nhsl1	2030.18	0.941133	0.282222	3.33473	0.000853829	0.00747322	Up
Klf12	645.801	2.06608	0.579987	3.56228	0.000367653	0.00259736	Up	Laptm4b	2149.16	1.42278	0.210614	6.75538	1.4246e-11	3.69482e-10	Up	Nid1	27579.5	0.856966	0.144714	5.92177	3.1849e-09	1.01663e-07	Up
Klf13	2330.07	1.25257	0.219171	5.71504	1.09679e-08	1.93084e-07	Up	Large	660.54	0.731981	0.341987	2.14038	0.0323244	0.111903	Up	Nipal3	1185.55	1.13375	0.385823	2.93853	0.0032977	0.023235	Up
Klf4	3927.01	1.22582	0.294077	4.16838	3.06774e-05	0.000283686	Up	Larp1b	596.653	0.911333	0.337785	2.69796	0.00697649	0.0328935	Up	Nkain2	25.3624	7.98625	3.14686	2.53785	0.0111536	0.0621613	Up
Klf6	4323.86	0.591652	0.261942	2.25871	0.0239011	0.0881906	Up	Lass1	44.6883	8.72655	3.35516	2.60093	0.00929711	0.0417366	Up	Nkain4	45.0109	8.81451	2.61779	3.36716	0.000759464	0.00676629	Up
Klf8	54.4028	8.86608	2.16124	4.1023	4.09056e-05	0.000367413	Up	Lcp2	337.061	11.6419	1.53554	7.58163	3.41232e-14	1.09794e-12	Up	Nkd1	2679.64	4.29474	0.272568	15.7566	6.18896e-56	2.00496e-53	Up
Klhdc5	558.67	1.18355	0.42472	2.78666	0.00532542	0.0259086	Up	Ldha	4782.7	0.830193	0.139088	5.96884	2.38943e-09	4.86839e-08	Up	Nlgn3	141.918	10.4705	2.13889	4.89531	9.81489e-07	1.93077e-05	Up
Klhl1	85.8981	7.94622	2.96176	2.68294	0.00729786	0.0337021	Up	Ldhb	542.092	3.71677	0.804676	4.61896	3.85659e-06	4.69259e-05	Up	Nme5	34.5312	5.31477	2.35424	2.25753	0.0239748	0.113508	Up
Klhl2	991.864	0.939275	0.411057	2.28502	0.0223115	0.083772	Up	Ldlrad3	2518.21	2.53707	0.246954	10.2735	9.28176e-25	5.55461e-23	Up	Nnat	165.526	10.693	1.8049	5.92442	3.13392e-09	1.00457e-07	Up
Klhl23	581.93	1.39303	0.47111	2.9569	0.0031075	0.016351	Up	Ldoc1l	168.794	1.72147	0.692354	2.4864	0.0129042	0.0543447	Up	Nol4	103.649	10.0171	2.18679	4.58075	4.63322e-06	7.72676e-05	Up
Klhl5	3111.03	0.576512	0.246634	2.33753	0.0194119	0.0750893	Up	Lef1	2003.72	6.50036	0.354541	18.3346	4.38547e-75	9.63551e-73	Up	Nomo1	8498.88	3.16017	0.167273	18.8923	1.32032e-79	7.73202e-77	Up
Klhl9	1749.96	0.626176	0.242021	2.58728	0.00967378	0.0426495	Up	Leprot	3860.94	0.40262	0.201693	1.9962	0.0459117	0.146135	Up	Nos2	860.501	2.07859	0.538403	3.86067	0.000113078	0.00130335	Up
Klk1	32.4047	8.11778	2.68746	3.02061	0.00252267	0.0137456	Up	Lhfpl2	3968.66	2.31441	0.204014	11.3444	7.91111e-30	5.76649e-28	Up	Nos3	5791.17	1.23364	0.212821	5.7966	6.7674e-09	2.06494e-07	Up
Kndc1	57.7689	8.95193	2.41498	3.70683	0.000209866	0.00158681	Up	Lhfpl3	52.7613	3.06628	1.20174	2.55153	0.0107252	0.0467955	Up	Nostrin	2088.19	4.83751	0.347655	13.9147	5.16035e-44	1.20879e-41	Up
Kpna4	1792.52	0.638712	0.253942	2.51519	0.011897	0.0506556	Up	Lhfpl4	358.752	2.97631	0.974484	3.05425	0.00225627	0.0129338	Up	Notum	1240.91	6.4226	1.87829	3.4194	0.000627604	0.00576351	Up
Krba1	201.911	1.7777	0.755257	2.35377	0.0185843	0.0727024	Up	Lhpp	163.71	1.69448	0.663412	2.55419	0.0106435	0.0464917	Up	Nova1	108.195	8.64238	1.98635	4.35089	1.35585e-05	0.000199653	Up
LOC100044193	56.5541	3.47292	1.23502	2.81204	0.0049228	0.0242386	Up	Lhx1	102.314	5.02938	1.63861	3.0693	0.00214561	0.0123919	Up	Noxo1	319.478	1.71831	0.802815	2.14035	0.0323263	0.140709	Up
LOC106740	54.7033	2.91933	1.23509	2.36366	0.0180955	0.0710415	Up	Limch1	6652.59	0.444211	0.155032	2.86528	0.00416643	0.0215218	Up	Npc1	1026.6	1.19428	0.44121	2.70683	0.00679282	0.0416543	Up
LOC626904	14.4164	6.9503	3.39412	2.04775	0.0405849	0.13348	Up	Limk2	1500.34	0.688701	0.273224	2.52064	0.0117141	0.0501847	Up	Npcd	476.702	2.73703	1.05446	2.59567	0.00944079	0.0543239	Up
Lactb	368.571	1.04318	0.519574	2.00775	0.0446697	0.143418	Up	Lims1	5371.26	0.342117	0.154582	2.21317	0.0268857	0.0971573	Up	Nptn	3746.42	0.913743	0.418258	2.18464	0.028915	0.129603	Up
Lair1	20.1349	7.43146	3.0098	2.46909	0.0135457	0.0561474	Up	Lin28b	25.2107	6.39628	2.6513	2.41251	0.0158433	0.0640392	Up	Nptx1	277.58	7.63802	1.49046	5.1246	2.98166e-07	6.71579e-06	Up
Lama1	1310.69	9.68146	0.747037	12.9598	2.06735e-38	2.024e-36	Up	Lin7a	59.4088	7.66898	1.88993	4.05781	4.95349e-05	0.000464825	Up	Nrbp2	211.063	2.26353	1.04776	2.16035	0.0307457	0.135455	Up
Lama2	135.679	1.85345	0.84483	2.19387	0.0282448	0.100217	Up	Lingo2	42.8707	8.66629	2.48826	3.48288	0.000496058	0.00352559	Up	Nrg2	23.8225	7.89558	3.41182	2.31418	0.0206578	0.100203	Up
Lama4	16144.5	1.28836	0.114103	11.2912	1.44996e-29	1.08926e-27	Up	Lipa	2390.53	1.96369	0.19497	10.0717	7.36682e-24	4.22767e-22	Up	Nrip1	2222.64	0.868028	0.258093	3.36324	0.00077033	0.00684707	Up
Lama5	1266.24	1.90102	0.282178	6.73696	1.61734e-11	4.01689e-10	Up	Lipc	115.966	5.91157	1.28883	4.58678	4.50139e-06	5.37093e-05	Up	Nrip3	185.765	5.35693	1.72649	3.10279	0.00191707	0.0147944	Up
Lamb1	5382.44	6.56931	0.355875	18.4596	4.36645e-76	1.03533e-73	Up	Lmbr1	1627.89	3.15077	0.279882	11.2575	2.1271e-29	1.52162e-27	Up	Nrk	243.708	6.95295	1.37132	5.07026	3.9727e-07	8.69086e-06	Up
Lamb2	3420.19	0.826307	0.194302	4.25271	2.11204e-05	0.000201194	Up	Lmbrd1	1582.81	1.44015	0.227706	6.32461	2.53867e-10	5.81022e-09	Up	Nrn1	90.9419	9.82856	2.11667	4.6434	3.42724e-06	5.91645e-05	Up
Lamc1	14000.4	1.77077	0.12901	13.7258	7.11005e-43	7.93345e-41	Up	Lmo2	7813.87	1.70601	0.215346	7.92215	2.33438e-15	8.12279e-14	Up	Nron	15.9412	7.31639	3.71647	1.96864	0.0489942	0.190109	Up
Lamc3	41.3562	8.47029	2.33024	3.63494	0.000278049	0.00203541	Up	Lmo3	18.1455	7.42672	2.69979	2.75086	0.00594399	0.0290693	Up	Nrsn1	35.0482	8.45271	2.9236	2.8912	0.00383772	0.026351	Up
Lancl1	240.781	2.21363	0.848896	2.60765	0.00911655	0.0406415	Up	Lmtk3	64.4709	3.79531	1.76208	2.15388	0.0312499	0.109119	Up	Nrsn2	83.1474	9.69914	2.54147	3.81634	0.000135444	0.00152479	Up
Lancl3	70.6819	9.24329	2.02951	4.55444	5.25246e-06	5.74251e-05	Up	Lonrf2	213.841	10.9854	3.09003	3.55512	0.000377809	0.00278585	Up	Nsg1	1599.65	3.58151	0.822068	4.35671	1.32029e-05	0.000194967	Up
Laptm4b	1991.5	1.26069	0.24769	5.0898	3.58432e-07	4.96731e-06	Up	Lor	26.1751	7.95453	2.48744	3.19788	0.00138442	0.00852474	Up	Nsg2	700.3	5.32728	1.28076	4.15945	3.19008e-05	0.000428326	Up
Larp6	25.0368	7.74561	2.88961	2.6805	0.00735117	0.0338927	Up	Lpcat3	1889.35	1.43659	0.221465	6.48678	8.76903e-11	2.11391e-09	Up	Nt5dc3	704.321	1.13803	0.447083	2.54545	0.0109137	0.0610477	Up
Lass1	40.4813	8.43906	3.76756	2.23993	0.0250955	0.0915223	Up	Lpcat4	301.517	1.50765	0.682173	2.21007	0.0271003	0.0977263	Up	Ntm	411.578	4.89598	1.58478	3.08938	0.00200572	0.0153849	Up
Lass5	1542.45	0.901779	0.302411	2.98197	0.00286399	0.0152763	Up	Lrba	1883.7	1.65859	0.231892	7.15241	8.52681e-13	2.46972e-11	Up	Ntrk2	369.333	4.168	1.69757	2.45528	0.0140776	0.0747371	Up
Lcorl	747.827	1.19031	0.364709	3.26373	0.00109958	0.00678847	Up	Lrfn5	133.126	10.3013	2.07533	4.9637	6.91622e-07	9.80382e-06	Up	Ntrk3	101.975	9.99362	2.25889	4.42413	9.68302e-06	0.000148623	Up
Lcp1	4336.71	1.28963	0.276631	4.6619	3.13304e-06	3.58281e-05	Up	Lrig1	480.606	3.00357	0.672312	4.46752	7.91303e-06	8.96849e-05	Up	Nucb1	3670.42	0.523553	0.208997	2.50507	0.0122427	0.0668365	Up
Ldlr	468.437	1.72837	0.631995	2.73479	0.00624202	0.0295291	Up	Lrp1b	78.0895	9.53156	2.10857	4.52039	6.17261e-06	7.11121e-05	Up	Nudt6	17.6657	7.4648	3.56538	2.09369	0.0362878	0.153237	Up
Ldlrad3	1940.17	7.01672	0.349666	20.0669	1.43554e-89	4.44579e-87	Up	Lrp4	1695.88	1.14109	0.277504	4.11199	3.92257e-05	0.000375181	Up	Nudt8	34.8113	4.89595	2.36025	2.07433	0.0380486	0.157941	Up
Ldlrap1	517.644	0.900495	0.417614	2.15629	0.0310611	0.107861	Up	Lrp8	13403.7	9.37704	0.262204	35.7624	4.24049e-280	1.08698e-276	Up	Nudt9	1759.46	0.844728	0.309324	2.73088	0.00631655	0.0392554	Up
Ldoc1l	116.455	9.96368	1.81955	5.47589	4.35321e-08	6.97571e-07	Up	Lrrc4c	109.573	4.42696	1.30599	3.38974	0.000699582	0.00471871	Up	Nup50	1996.84	0.552449	0.268309	2.059	0.0394942	0.162524	Up
Lef1	1788.63	7.12183	2.68177	2.65565	0.00791559	0.0361369	Up	Lrrc55	1993.71	6.93457	1.25453	5.52764	3.2456e-08	5.64273e-07	Up	Nup62-il4i1	35.3016	8.46358	2.7688	3.05677	0.00223735	0.0167895	Up
Lekr1	32.2449	6.69476	2.32148	2.88383	0.00392873	0.0200466	Up	Lrrc7	22.7154	7.7515	2.59181	2.99076	0.00278281	0.0154623	Up	Nupl1	665.311	1.04205	0.454105	2.29474	0.0217478	0.104557	Up
Lhfp	316.456	1.83767	0.771532	2.38185	0.0172259	0.0682692	Up	Lrrfip1	2250.09	0.990966	0.232803	4.25668	2.07487e-05	0.00021246	Up	Nupl2	71.0853	3.1992	1.2906	2.47885	0.0131805	0.0709893	Up
Lhfpl3	42.4782	8.50847	2.38577	3.56635	0.000361994	0.00256216	Up	Lrrn1	119.048	10.14	1.82448	5.55775	2.73268e-08	4.78686e-07	Up	Nwd1	49.0558	8.93779	2.7859	3.20822	0.00133559	0.010888	Up
Lhfpl4	310.797	3.64488	1.08737	3.35202	0.000802241	0.0051454	Up	Lrrn2	98.495	4.4418	1.80559	2.46003	0.0138927	0.0575153	Up	Nxph3	29.3447	8.19705	2.95847	2.77071	0.00559344	0.0356641	Up
Lhx1	90.1013	8.18196	2.21615	3.69198	0.000222515	0.00166996	Up	Lrrn3	247.447	3.42909	1.03652	3.30827	0.000938759	0.00609975	Up	Nxph4	101.193	22.7054	3.36347	6.75058	1.47252e-11	6.67281e-10	Up
Limch1	4768.58	1.36919	0.162047	8.44935	2.9293e-17	1.20467e-15	Up	Lrrtm3	22.4156	3.92932	1.7512	2.24379	0.0248459	0.0912453	Up	Oaz1	397.954	4.02087	1.61979	2.48234	0.0130524	0.0704488	Up
Lims1	3792.46	1.28806	0.204141	6.30963	2.79709e-10	6.08979e-09	Up	Lsamp	53.5631	8.98759	2.33828	3.84367	0.000121206	0.00103106	Up	Ocln	2519.79	6.26517	1.66194	3.7698	0.00016338	0.0018045	Up
Lin28b	22.4869	6.03316	2.92628	2.06172	0.0392347	0.129969	Up	Lsr	3235.32	6.296	0.289495	21.7482	7.1879e-105	2.98784e-102	Up	Odz1	82.8678	8.25866	2.21885	3.72205	0.000197613	0.00212032	Up
Lin7a	53.5077	7.42348	2.05878	3.60577	0.000311231	0.00223942	Up	Luzp1	6842.38	0.415251	0.134299	3.092	0.00198815	0.0115737	Up	Odz2	410.115	12.0017	3.75741	3.19414	0.00140248	0.0113465	Up
Lingo1	46.3297	8.63353	2.61673	3.29936	0.00096906	0.0060867	Up	Luzp2	256.032	6.39066	1.18124	5.41014	6.29766e-08	1.05166e-06	Up	Odz3	640.583	5.35126	1.5054	3.55471	0.000378395	0.00375094	Up
Lingo2	38.7941	8.3774	2.77309	3.02096	0.00251972	0.0137345	Up	Ly6c1	5677.96	1.61711	0.339585	4.76202	1.91661e-06	2.51944e-05	Up	Ogt	1968.44	1.32961	0.315246	4.21767	2.4684e-05	0.000340125	Up
Lipa	2469.95	1.15908	0.207145	5.5955	2.19992e-08	3.68882e-07	Up	Ly6h	128.602	10.2514	1.89726	5.40325	6.5445e-08	1.08708e-06	Up	Olfm3	44.1161	8.78483	4.00477	2.19359	0.0282648	0.127552	Up
Lipc	102.775	7.24989	1.55551	4.66079	3.15e-06	3.59949e-05	Up	Ly75	4966.45	6.89752	0.810166	8.51372	1.68441e-17	6.65969e-16	Up	Olfml1	25.5668	6.5552	2.71115	2.41787	0.0156117	0.0807965	Up
Lmbr1	1560.1	2.39785	0.333438	7.19129	6.41837e-13	1.80368e-11	Up	Lynx1	540.677	4.44749	0.942076	4.72094	2.34756e-06	3.02391e-05	Up	Olfml3	46.5078	8.86103	2.57484	3.44139	0.000578735	0.00539279	Up
Lmbrd1	1444.73	1.34514	0.297027	4.52869	5.9351e-06	6.40122e-05	Up	Lypd1	80.9905	5.03088	1.28005	3.93023	8.48631e-05	0.000749251	Up	Olfr520	18.0191	7.49398	3.75642	1.99498	0.0460453	0.181864	Up
Lmln	33.54	5.24704	2.05656	2.55136	0.0107303	0.0465234	Up	Lypd6	166.277	2.1342	0.979888	2.178	0.0294058	0.103873	Up	Olig1	70.7389	8.02881	2.11765	3.79138	0.00014981	0.00166863	Up
Lmna	571.384	1.09375	0.491338	2.22606	0.0260103	0.0941793	Up	Lysmd1	320.433	1.65353	0.495567	3.33664	0.000847978	0.00557108	Up	Olig2	27.3758	8.09685	3.03374	2.66894	0.00760919	0.0457935	Up
Lmnb1	2364.46	0.768464	0.280802	2.73668	0.00620633	0.029404	Up	Lztfl1	284.709	1.44268	0.59716	2.4159	0.0156962	0.0635284	Up	Opcml	219.702	11.1011	2.11486	5.2491	1.52842e-07	3.65907e-06	Up
Lmo2	6407.6	2.34522	0.24144	9.71347	2.64196e-22	1.45788e-20	Up	M6pr	4003.2	1.31935	0.19589	6.73519	1.63719e-11	4.23193e-10	Up	Ophn1	1023.92	1.30949	0.425275	3.07915	0.0020759	0.0157566	Up
Lmo3	16.2713	7.12451	3.20992	2.21953	0.0264508	0.0955694	Up	Macrod2	181.018	1.85072	0.803733	2.30265	0.0212983	0.0809809	Up	Oplah	271.169	2.58061	1.31104	1.96836	0.0490268	0.190181	Up
Lonrf2	193.791	9.21935	1.93272	4.77015	1.84091e-06	2.22066e-05	Up	Madcam1	165.218	10.613	1.64767	6.44125	1.1849e-10	2.80798e-09	Up	Oprl1	59.0006	9.20413	2.64821	3.4756	0.000509708	0.00482938	Up
Lonrf3	458.597	2.3028	0.612321	3.76077	0.000169388	0.00131347	Up	Mafg	479.97	1.40704	0.519919	2.70627	0.00680443	0.03231	Up	Orai1	303.372	2.468	0.64361	3.83462	0.00012576	0.00143004	Up
Lor	23.5992	7.66038	2.89225	2.64858	0.00808297	0.0367904	Up	Mag	71.7964	9.41035	1.96805	4.78157	1.73932e-06	2.30015e-05	Up	Ormdl3	844.728	1.22765	0.467967	2.62337	0.00870638	0.0510055	Up
Lpar4	405.962	1.83381	0.522415	3.51025	0.000447677	0.00309358	Up	Mageh1	719.711	0.835038	0.390934	2.13601	0.0326786	0.112766	Up	Osbp2	35.9302	7.04907	2.48162	2.84052	0.00450406	0.0300652	Up
Lpcat2	21.1474	7.50338	3.20751	2.33931	0.0193193	0.0748283	Up	Magi2	92.5194	2.15653	0.949983	2.27007	0.0232033	0.0865762	Up	Osbpl1a	985.36	1.69064	0.482198	3.5061	0.000454723	0.00439075	Up
Lpcat4	223.314	3.17052	0.886702	3.57563	0.000349388	0.00248568	Up	Magi3	3214.09	0.444759	0.17987	2.47267	0.013411	0.0559275	Up	Osbpl6	147.324	3.99655	1.10873	3.60461	0.000312627	0.00319038	Up
Lphn3	1701.56	8.28366	2.36949	3.49597	0.000472338	0.00324772	Up	Mal	782.682	5.73165	1.54798	3.70267	0.000213345	0.00168442	Up	Osmr	2619.07	3.31009	0.417377	7.9307	2.17915e-15	1.46813e-13	Up
Lrch3	3260.08	0.680957	0.207469	3.2822	0.00102999	0.00642423	Up	Mamld1	931.688	0.760326	0.316271	2.40404	0.0162152	0.0652339	Up	Otx1	54.6922	7.62797	2.21543	3.44311	0.000575067	0.00536518	Up
Lrfn2	17.7688	7.25086	3.22627	2.24744	0.0246117	0.0901262	Up	Man1a	904.33	1.8901	0.355525	5.31635	1.05869e-07	1.70857e-06	Up	Ovgp1	27.2931	5.56916	2.5537	2.18082	0.0291964	0.130595	Up
Lrfn4	79.4627	6.95975	1.60311	4.34141	1.41569e-05	0.000140781	Up	Man1c1	2067.49	0.929973	0.257775	3.60769	0.00030893	0.00233941	Up	P2rx5	43.7106	8.77193	2.57503	3.40653	0.000657944	0.00599154	Up
Lrfn5	120.468	10.0124	2.22018	4.50971	6.49164e-06	6.95206e-05	Up	Manba	570.736	0.724156	0.346225	2.09158	0.0364765	0.122518	Up	Pacsin1	82.8731	9.69436	2.50213	3.87444	0.00010687	0.00124081	Up
Lrig1	537.061	1.31803	0.559869	2.35417	0.018564	0.0726805	Up	Manbal	492.456	1.23899	0.470055	2.63584	0.00839298	0.0384866	Up	Pafah1b2	4361.97	0.558631	0.211974	2.63538	0.00840433	0.0496857	Up
Lrp1	663.295	2.55302	0.955375	2.67227	0.00753394	0.0345818	Up	Maneal	56.8018	5.17024	1.97241	2.62129	0.00875987	0.0397541	Up	Pak3	126.634	10.3061	2.1447	4.80539	1.54447e-06	2.89965e-05	Up
Lrp10	1722.32	0.858782	0.261677	3.28184	0.00103131	0.00642982	Up	Maoa	7918.9	0.921878	0.172408	5.34706	8.93946e-08	1.45645e-06	Up	Pak7	54.7095	4.73021	2.32887	2.03112	0.042243	0.170563	Up
Lrp1b	70.9608	7.74984	2.15195	3.60132	0.000316611	0.00227381	Up	Map2k7	1504.85	0.757457	0.277001	2.73449	0.00624767	0.0302564	Up	Palmd	3696.94	2.47278	0.402152	6.14887	7.80349e-10	2.7696e-08	Up
Lrp4	1086.41	4.73573	0.51821	9.13864	6.32452e-20	3.06628e-18	Up	Map3k1	2744.51	1.31029	0.23239	5.6383	1.71739e-08	3.10017e-07	Up	Panx2	52.0065	9.02212	2.58138	3.49507	0.000473932	0.00454128	Up
Lrp8	12030.5	8.04761	0.231728	34.7287	2.90805e-264	4.41296e-261	Up	Map4k2	1780.51	1.0507	0.213467	4.92206	8.56376e-07	1.19628e-05	Up	Paqr3	30.8051	6.8266	2.56503	2.66141	0.00778143	0.046609	Up
Lrrc16b	21.0114	7.49262	3.46585	2.16184	0.0306304	0.106666	Up	Map4k5	3844.22	0.747197	0.215681	3.46436	0.000531488	0.00374109	Up	Paqr7	462.948	3.55806	0.986274	3.60758	0.000309063	0.0031625	Up
Lrrc49	279.798	1.74991	0.590981	2.96103	0.00306615	0.0161783	Up	Mapk1	3953.85	0.337972	0.162843	2.07544	0.0379454	0.126402	Up	Paqr8	421.436	1.81743	0.808891	2.24681	0.024652	0.115813	Up
Lrrc4b	35.7592	8.26	2.53447	3.25907	0.00111779	0.00687855	Up	Mapk10	113.565	4.87737	1.4652	3.32882	0.000872155	0.00570312	Up	Paqr9	52.7994	9.04391	2.67389	3.38231	0.000718794	0.00645304	Up
Lrrc4c	94.7041	9.66516	2.23474	4.32496	1.52562e-05	0.000150528	Up	Mapk4	57.8122	4.30924	1.80531	2.38698	0.0169873	0.0677552	Up	Pard3	897.121	1.6241	0.399965	4.06061	4.89451e-05	0.000624152	Up
Lrrc55	1835.37	4.7332	0.671345	7.05032	1.78503e-12	4.84575e-11	Up	Mapk6	4063.5	0.835223	0.226738	3.68365	0.000229919	0.00179957	Up	Pard6g	552.888	3.32824	0.82396	4.03932	5.36067e-05	0.00067792	Up
Lrrc8b	608.184	1.1895	0.395396	3.00837	0.00262656	0.0142147	Up	Mapk8ip1	254.538	3.88742	0.868492	4.47606	7.60334e-06	8.63021e-05	Up	Parp6	573.878	1.37873	0.553444	2.49118	0.0127319	0.0690221	Up
Lrrfip1	1962.5	1.10859	0.273281	4.05661	4.97901e-05	0.000439794	Up	Mapk8ip2	158.546	4.28321	1.5091	2.83826	0.00453606	0.0231238	Up	Parvb	9459.14	1.84747	0.200571	9.21108	3.22856e-20	3.19208e-18	Up
Lrrn2	85.1279	9.51134	2.25622	4.21561	2.49101e-05	0.000234498	Up	Mapkbp1	2467.55	1.89099	0.225227	8.39594	4.62192e-17	1.79056e-15	Up	Pcca	960.248	2.3032	0.46764	4.92515	8.42958e-07	1.68437e-05	Up
Lrrn3	205.084	9.30518	1.87763	4.9558	7.20346e-07	9.33497e-06	Up	Mapre1	7530.33	0.505046	0.161045	3.13606	0.00171234	0.0102116	Up	Pcdh1	4788.17	1.13765	0.224897	5.05856	4.22431e-07	9.09751e-06	Up
Lrrtm3	19.1882	5.81435	2.6401	2.20232	0.0276428	0.0988638	Up	Mapre3	275.668	1.69639	0.617619	2.74666	0.00602051	0.0294051	Up	Pcdh11x	26.5239	8.0508	3.11206	2.58697	0.00968253	0.0554026	Up
Lrtm2	40.4813	8.43906	3.76756	2.23993	0.0250955	0.0915223	Up	March4	105.659	5.14129	1.29594	3.96721	7.27188e-05	0.000650619	Up	Pcdh12	7405.79	0.699115	0.240456	2.90746	0.0036438	0.0252397	Up
Lsamp	48.4562	8.69828	2.58793	3.3611	0.000776336	0.00500676	Up	March6	4090.41	0.511059	0.202302	2.52622	0.0115298	0.049547	Up	Pcdh15	44.4535	8.79616	2.55896	3.4374	0.000587324	0.00545946	Up
Lsm14a	2844.87	0.904725	0.212009	4.26738	1.97779e-05	0.000189956	Up	Marveld2	591.223	1.10419	0.359482	3.07161	0.00212908	0.0123195	Up	Pcdh19	3031.5	2.42627	0.394973	6.14287	8.10429e-10	2.85639e-08	Up
Lsm14b	726.957	1.41778	0.692547	2.04719	0.0406391	0.13357	Up	Matk	54.6252	9.01607	2.64139	3.41339	0.000641612	0.00438383	Up	Pcdh7	279.601	2.91099	1.20666	2.41244	0.0158463	0.0817461	Up
Lsr	2932.01	5.37408	0.23598	22.7735	8.40611e-115	3.54341e-112	Up	Max	1764.59	1.72609	0.334024	5.16757	2.37159e-07	3.60782e-06	Up	Pcdh9	303.655	11.568	1.84925	6.25551	3.96221e-10	1.46785e-08	Up
Lss	81.7436	9.45282	2.11086	4.47818	7.52821e-06	7.95547e-05	Up	Mbp	708.798	4.74138	0.659226	7.19234	6.36884e-13	1.85869e-11	Up	Pcdha10	72.2792	9.49713	2.27605	4.17263	3.01103e-05	0.000406075	Up
Lta4h	1126.5	0.8786	0.314757	2.79136	0.00524868	0.0256023	Up	Mcf2	34.7119	8.3626	2.19425	3.81114	0.000138327	0.00115373	Up	Pcdha11	32.7495	8.3553	2.84309	2.93881	0.00329475	0.023225	Up
Luzp2	228.484	10.9359	1.85282	5.90229	3.58496e-09	6.78327e-08	Up	Mcf2l	6010.57	1.05017	0.126699	8.28873	1.14469e-16	4.36856e-15	Up	Pcdha4	40.3775	8.65705	4.0932	2.11499	0.0344311	0.147592	Up
Lxn	1000.06	2.21007	0.380172	5.81334	6.12391e-09	1.1183e-07	Up	Mcfd2	1737.29	0.674779	0.211655	3.1881	0.0014321	0.00877169	Up	Pcdha6	34.8941	8.44646	4.2497	1.98754	0.0468622	0.184183	Up
Ly6a	1146.91	0.631402	0.309137	2.04246	0.0411056	0.134725	Up	Mcts1	331.888	0.846002	0.428446	1.97459	0.0483152	0.151527	Up	Pcdhac1	73.5268	9.52187	3.5738	2.66436	0.00771356	0.0462782	Up
Ly6c1	3924.28	5.46316	0.219609	24.8768	1.32797e-136	6.94895e-134	Up	Mdfi	210.687	1.23783	0.555275	2.22922	0.0257993	0.0938934	Up	Pcdhac2	288.375	24.163	4.7849	5.04984	4.42186e-07	9.40324e-06	Up
Ly6e	2286.94	2.27159	0.259267	8.76161	1.92485e-18	8.61638e-17	Up	Mdga2	371.325	6.29632	0.845113	7.45028	9.31446e-14	2.90581e-12	Up	Pcdhb13	65.4323	6.85618	2.07099	3.31058	0.000931042	0.00805	Up
Ly6h	116.167	9.95988	2.03637	4.89099	1.00329e-06	1.26558e-05	Up	Mdh1	2427.12	1.48845	0.382868	3.88762	0.00010123	0.000878624	Up	Pcdhb17	817.899	0.877015	0.440143	1.99257	0.0463086	0.182573	Up
Ly75	4416.82	10.9596	0.58586	18.7069	4.34687e-78	1.08137e-75	Up	Mea1	927.909	1.19687	0.268263	4.46155	8.13684e-06	9.1681e-05	Up	Pcdhb2	21.3148	7.73538	3.35525	2.30546	0.0211408	0.102206	Up
Lynx1	467.062	11.9675	1.74594	6.85448	7.15711e-12	1.83461e-10	Up	Mecom	3061.36	0.81499	0.185459	4.39444	1.11058e-05	0.000121054	Up	Pcdhb20	499.192	1.25277	0.564841	2.21792	0.0265606	0.121994	Up
Lypd1	70.6919	9.2434	2.05539	4.49716	6.88686e-06	7.34938e-05	Up	Mecp2	2083.82	0.60228	0.205207	2.93499	0.00333557	0.0179186	Up	Pcdhga2	94.5701	9.88513	2.05423	4.81209	1.49359e-06	2.81803e-05	Up
Lyrm1	31.916	4.43422	2.13925	2.07279	0.038192	0.127062	Up	Med10	697.281	1.14682	0.308336	3.71937	0.000199723	0.00159903	Up	Pcdhga6	293.749	2.64458	0.745535	3.54722	0.000389314	0.00385165	Up
Lyrm5	181.015	1.84233	0.729535	2.52535	0.0115582	0.0495188	Up	Med12l	93.015	3.58177	1.24556	2.87563	0.00403219	0.020951	Up	Pcdhga7	175.77	7.36583	1.34595	5.47258	4.43526e-08	1.17446e-06	Up
M6pr	4015.06	0.815314	0.21455	3.8001	0.000144635	0.00114673	Up	Meg3	1607.56	3.6241	1.07683	3.36551	0.000764011	0.00509522	Up	Pcdhga9	127.145	3.13541	1.01682	3.08354	0.00204556	0.0156276	Up
Macrod2	149.525	2.50927	0.897588	2.79557	0.00518084	0.0253447	Up	Megf6	2976.47	1.30964	0.16348	8.01098	1.13796e-15	4.02342e-14	Up	Pcdhgc3	8196.18	1.24304	0.277379	4.48137	7.41656e-06	0.000116417	Up
Mad2l2	188.559	1.74461	0.721834	2.41691	0.0156527	0.0630388	Up	Meox1	1397.31	2.05322	0.236147	8.69467	3.4784e-18	1.44199e-16	Up	Pcid2	233.225	1.6767	0.752055	2.22949	0.0257816	0.119461	Up
Madcam1	148.915	8.85714	1.68145	5.26757	1.3824e-07	2.0607e-06	Up	Metap1	891.753	0.865532	0.319417	2.70973	0.00673382	0.0320936	Up	Pclo	392.555	5.06894	1.65962	3.05427	0.00225608	0.0168864	Up
Mag	68.3998	4.16756	1.93878	2.14958	0.0315883	0.109466	Up	Mfap1b	2081.12	0.534783	0.25003	2.13887	0.0324459	0.112164	Up	Pcnxl2	54.0858	9.07881	3.81565	2.37936	0.0173427	0.0877659	Up
Magee1	356.934	2.72266	1.13631	2.39605	0.016573	0.0660612	Up	Mfap3l	576.813	4.20166	0.704251	5.96613	2.42942e-09	4.94239e-08	Up	Pcp4	1109.36	5.95886	1.88928	3.15403	0.00161032	0.0127835	Up
Mageh1	538.33	1.71686	0.460409	3.72899	0.000192252	0.00147122	Up	Mff	1899.5	1.57542	0.26178	6.0181	1.7648e-09	3.67787e-08	Up	Pcp4l1	536.04	4.47031	0.967341	4.62123	3.81472e-06	6.51885e-05	Up
Magi3	2546.65	0.905344	0.23135	3.91331	9.10392e-05	0.000756168	Up	Mfhas1	2103.12	0.870154	0.213216	4.08109	4.48248e-05	0.000423728	Up	Pcsk1n	27.6112	8.10856	3.67012	2.20935	0.0271505	0.123777	Up
Mal	1045.39	0.943813	0.352668	2.67621	0.00744599	0.0342403	Up	Mfn2	1403.09	0.52652	0.226216	2.32751	0.0199381	0.0766618	Up	Pcsk2	152.137	10.5708	2.12782	4.96793	6.76722e-07	1.38865e-05	Up
Mamld1	624.703	2.40081	0.395371	6.0723	1.26088e-09	2.53764e-08	Up	Mfng	2330.53	0.49812	0.206874	2.40784	0.016047	0.0647267	Up	Pctp	35.9799	8.4908	2.78061	3.05357	0.00226136	0.0169113	Up
Man1a2	1847.86	0.809412	0.374148	2.16335	0.0305146	0.106328	Up	Mfsd2a	12597.3	13.4263	0.740798	18.1241	2.0568e-73	4.21782e-71	Up	Pcx	1406.09	3.17991	0.32994	9.63784	5.53375e-22	5.85117e-20	Up
Maneal	49.9797	8.74295	2.57551	3.39465	0.000687176	0.0045006	Up	Mfsd7c	2024.83	5.90706	0.284188	20.7858	5.82465e-96	1.86631e-93	Up	Pde1b	98.5827	6.85664	1.97149	3.4779	0.00050535	0.00479704	Up
Maoa	5973.91	1.80404	0.47144	3.82667	0.000129891	0.0010407	Up	Mgat3	150.894	3.31523	1.27575	2.59864	0.00935929	0.0419301	Up	Pde1c	978.493	10.2173	1.35513	7.53968	4.71138e-14	2.89256e-12	Up
Maob	63.0266	9.07823	2.06496	4.39632	1.10104e-05	0.000111836	Up	Mgat4a	901.131	4.04091	0.366917	11.0132	3.30206e-28	2.25714e-26	Up	Pde4b	3997.82	1.43328	0.284586	5.03639	4.74392e-07	1.00182e-05	Up
Map3k1	2495.92	1.23897	0.239859	5.16542	2.39905e-07	3.4248e-06	Up	Mgat4c	102.455	4.6247	1.69364	2.73063	0.00632129	0.030544	Up	Pde4dip	795.126	1.79509	0.584339	3.072	0.00212633	0.0160673	Up
Map4k2	1664.35	0.872074	0.251565	3.46659	0.000527103	0.00357248	Up	Mgat5b	36.7019	8.44283	2.16066	3.90753	9.32443e-05	0.000815755	Up	Pde5a	1576.92	2.51449	0.356414	7.05497	1.72638e-12	8.94078e-11	Up
Mapk10	98.9614	9.72868	1.93759	5.02101	5.14001e-07	6.90874e-06	Up	Mia3	4614.19	0.373484	0.153892	2.42693	0.0152273	0.0619565	Up	Pde8b	62.9971	7.86117	2.12444	3.70035	0.000215306	0.00228768	Up
Mapk6	3575.99	0.90749	0.23026	3.94116	8.10891e-05	0.000683626	Up	Miat	171.647	3.01328	1.07964	2.791	0.00525457	0.0261623	Up	Pdgfra	149.948	9.09405	1.89684	4.79431	1.63235e-06	3.04958e-05	Up
Mapk8ip1	219.913	5.49911	1.4752	3.72771	0.000193229	0.0014772	Up	Micall2	185.592	1.94141	0.721873	2.68941	0.00715788	0.033625	Up	Pdhx	557.533	2.67203	0.839246	3.18385	0.00145332	0.011708	Up
Mapk8ip2	147.519	3.63316	1.57243	2.31054	0.0208584	0.0794693	Up	Mif4gd	588.671	1.48191	0.433568	3.41793	0.000630986	0.0043189	Up	Pdlim5	5259.51	0.580068	0.200196	2.8975	0.0037615	0.025927	Up
Mapkbp1	2368.89	1.47542	0.268326	5.4986	3.82818e-08	6.20648e-07	Up	Mina	413.612	1.05892	0.474144	2.23334	0.0255265	0.0931873	Up	Pdxdc1	2130	0.709949	0.25959	2.73489	0.0062401	0.0389177	Up
Mapt	685.702	3.27476	1.07758	3.03898	0.00237378	0.0130185	Up	Mkl2	5872.99	0.389561	0.156942	2.4822	0.0130575	0.0547944	Up	Pdxk	2098.71	4.08918	0.40442	10.1112	4.92699e-24	5.77064e-22	Up
March4	99.8143	3.74709	1.38625	2.70304	0.00687076	0.031973	Up	Mlc1	118.903	8.70423	1.73686	5.01148	5.40122e-07	7.75637e-06	Up	Pdzd2	3248.52	1.14772	0.22678	5.06094	4.17184e-07	8.99722e-06	Up
March6	3524.64	0.660282	0.304274	2.17003	0.0300046	0.105058	Up	Mlf2	3203.86	0.555048	0.178773	3.10477	0.00190429	0.0111573	Up	Pea15a	6426.15	0.770512	0.170981	4.50641	6.59322e-06	0.000104899	Up
Mark1	108.046	9.85532	2.0522	4.80231	1.56844e-06	1.91481e-05	Up	Mllt11	1204.99	2.36324	0.655383	3.60589	0.00031109	0.00235345	Up	Pex5l	22.2819	7.79933	3.32273	2.34727	0.0189117	0.0937946	Up
Marveld2	395.545	3.42472	0.687364	4.98239	6.28031e-07	8.2514e-06	Up	Mllt3	1007.11	1.09477	0.364818	3.00088	0.00269204	0.0150449	Up	Pfkp	2025.86	1.67852	0.308969	5.43266	5.55195e-08	1.44256e-06	Up
Mast4	2100.78	2.3096	0.287822	8.02439	1.02031e-15	3.70413e-14	Up	Mlycd	323.228	1.43189	0.557715	2.56743	0.0102456	0.0451255	Up	Pgbd5	77.6689	9.60078	2.49769	3.84387	0.00012111	0.0013844	Up
Matk	49.4725	8.72832	2.89153	3.01859	0.00253957	0.0138129	Up	Mmab	321.353	1.15026	0.497728	2.31102	0.0208319	0.0796011	Up	Pgcp	439.834	1.12701	0.559973	2.01262	0.0441543	0.176455	Up
Matn4	21.8221	7.54735	3.00198	2.51412	0.0119328	0.0507458	Up	Mmd2	113.456	10.0706	1.79616	5.60673	2.06189e-08	3.65344e-07	Up	Pggt1b	777.286	0.971202	0.477015	2.036	0.0417506	0.169203	Up
Max	1697.64	1.32531	0.345775	3.83288	0.000126651	0.00101959	Up	Mmp17	243.685	1.74876	0.734311	2.38149	0.0172425	0.0685246	Up	Pglyrp1	1586.41	12.5126	1.47921	8.45901	2.69645e-17	2.12726e-15	Up
Mbd5	968.978	1.12509	0.342148	3.28831	0.00100789	0.00629934	Up	Mmp25	879.969	7.91607	0.592879	13.3519	1.15452e-40	1.16819e-38	Up	Pgp	110.712	3.52053	1.07492	3.27515	0.00105606	0.00895795	Up
Mboat1	57.9111	8.95634	2.1434	4.17856	2.93359e-05	0.000272944	Up	Mmp28	405.691	1.50819	0.420378	3.58771	0.000333601	0.00250465	Up	Phactr2	4396.07	0.601464	0.232754	2.58412	0.00976285	0.0557221	Up
Mboat7	448.501	1.61286	0.531171	3.03641	0.0023941	0.0131157	Up	Mmrn1	1161.4	4.00773	0.36302	11.04	2.45106e-28	1.69046e-26	Up	Phactr3	69.5688	9.44193	2.87405	3.28524	0.00101897	0.00868691	Up
Mbp	662.903	3.72333	0.689716	5.39835	6.72561e-08	1.04571e-06	Up	Mmrn2	5928.21	0.817838	0.124241	6.58266	4.62116e-11	1.15379e-09	Up	Phf21b	146.57	2.02868	0.969641	2.09219	0.0364214	0.153427	Up
Mbtd1	1285.27	0.852415	0.318873	2.67321	0.00751294	0.0345063	Up	Mob3b	233.733	3.46016	1.26828	2.72824	0.00636739	0.0306896	Up	Phyhipl	175.392	2.33799	0.982712	2.37912	0.0173539	0.0877841	Up
Mcf2	31.119	8.06002	2.55416	3.15564	0.00160144	0.00932893	Up	Mob4	1693.07	0.496198	0.234513	2.11587	0.0343557	0.116978	Up	Pid1	61.8221	9.27153	2.67944	3.46024	0.000539685	0.00506925	Up
Mcf2l	3653	7.61218	0.2935	25.9359	2.62216e-148	1.59165e-145	Up	Mobp	216.294	11.0016	1.74328	6.31085	2.77507e-10	6.29506e-09	Up	Pigc	451.432	1.24552	0.576775	2.15945	0.0308153	0.135684	Up
Mdga2	336.371	5.7565	1.3485	4.26882	1.96507e-05	0.000188854	Up	Morf4l1	10764.8	0.279847	0.117456	2.38257	0.017192	0.0683416	Up	Pigs	594.027	1.4721	0.678037	2.17112	0.0299222	0.132826	Up
Mdh1	2105.91	1.7027	0.432161	3.93997	8.14924e-05	0.000686264	Up	Morf4l2	7223.15	0.429958	0.158096	2.71961	0.00653589	0.0314046	Up	Pik3cg	1433.9	1.54753	0.415348	3.72585	0.000194656	0.00209015	Up
Mdk	133.054	2.34534	0.800293	2.9306	0.00338306	0.0176358	Up	Mosc2	2281.37	0.833107	0.199752	4.17071	3.03646e-05	0.000302075	Up	Pink1	1783.69	0.844999	0.29451	2.86916	0.00411558	0.0279624	Up
Me1	159.649	8.94852	1.80329	4.96233	6.96529e-07	9.04951e-06	Up	Mospd1	1133.19	1.78417	0.252122	7.07661	1.47727e-12	4.21528e-11	Up	Pip5k1b	278.182	7.44656	1.1753	6.33587	2.36007e-10	9.08164e-09	Up
Med14	1343.09	0.720519	0.315211	2.28583	0.0222642	0.0836701	Up	Mphosph8	1086.23	0.703181	0.280873	2.50355	0.0122953	0.052166	Up	Pitpna	7858.46	0.825366	0.189207	4.36223	1.28743e-05	0.000191429	Up
Med28	352.97	1.59632	0.548115	2.91238	0.00358684	0.0185579	Up	Mpp1	1091.38	0.71515	0.316916	2.25659	0.0240336	0.0890261	Up	Pja2	4761.48	0.983662	0.260179	3.78072	0.000156377	0.00173923	Up
Mef2a	3794.68	0.463796	0.234657	1.97648	0.0481003	0.151688	Up	Mpp2	178.125	1.88633	0.827408	2.27981	0.0226193	0.0848494	Up	Pkia	560.238	1.42156	0.707986	2.00789	0.0446553	0.17785	Up
Meg3	1405.99	4.40819	0.777087	5.67271	1.40553e-08	2.44598e-07	Up	Mpp5	2210.75	1.02438	0.187738	5.45642	4.85821e-08	8.1929e-07	Up	Pkm2	10955.7	0.754677	0.149312	5.05437	4.31806e-07	9.27134e-06	Up
Megf6	2821.68	1.04831	0.297441	3.52444	0.000424382	0.00295412	Up	Mpp6	762.982	1.30543	0.454454	2.87253	0.00407199	0.0211222	Up	Pknox2	109.38	4.84034	1.79527	2.69616	0.00701432	0.0427296	Up
Megf9	286.631	2.78426	1.05519	2.63863	0.00832429	0.0377383	Up	Mpp7	433.28	0.960425	0.407425	2.3573	0.0184082	0.072077	Up	Pkp4	5190.36	1.35707	0.300582	4.5148	6.33756e-06	0.000101527	Up
Meox1	1009.79	11.6404	1.43896	8.0895	5.99093e-16	2.2228e-14	Up	Mpzl1	7946.27	1.6491	0.127771	12.9067	4.12556e-38	3.84552e-36	Up	Pla2g12a	260.352	3.7818	1.70652	2.21609	0.0266851	0.122308	Up
Mfap3l	496.712	7.29451	1.15219	6.331	2.43582e-10	5.34928e-09	Up	Mro	21.9285	4.27909	2.13931	2.00022	0.0454765	0.145019	Up	Pla2g2f	41.9853	8.71411	2.67179	3.26152	0.00110816	0.00931172	Up
Mfap4	89.544	3.36782	1.17157	2.87463	0.00404498	0.0205706	Up	Mrpl16	338.715	1.06124	0.455449	2.33009	0.0198014	0.0763272	Up	Pla2g4e	51.1185	8.99751	2.46834	3.64517	0.000267214	0.00277721	Up
Mff	1865.76	1.10438	0.360293	3.06522	0.00217512	0.0120818	Up	Mrpl17	1342.1	0.728375	0.243597	2.99008	0.00278904	0.0154913	Up	Plagl1	2047.37	0.86166	0.357903	2.40753	0.0160609	0.0826441	Up
Mfge8	1964.85	0.580998	0.283519	2.04924	0.0404384	0.133056	Up	Mrpl41	400.165	1.21693	0.407248	2.98817	0.00280653	0.0155772	Up	Plcb4	2599.48	1.08542	0.396397	2.73821	0.00617742	0.0386368	Up
Mfhas1	1409.2	2.67553	0.314381	8.51047	1.7323e-17	7.22187e-16	Up	Mrpl54	102.699	2.18834	0.923928	2.36851	0.0178597	0.0703952	Up	Plcd3	27.3217	8.09344	3.12807	2.58736	0.00967149	0.0553602	Up
Mfng	1396.47	2.81534	0.329755	8.53765	1.36974e-17	5.78992e-16	Up	Mrps33	517.844	1.16612	0.417843	2.7908	0.00525773	0.0261696	Up	Plce1	90.5701	8.35882	2.16662	3.858	0.000114319	0.00131467	Up
Mfsd2a	11289.2	11.226	2.30603	4.86811	1.12672e-06	1.40148e-05	Up	Msi2	4222.23	0.373287	0.188596	1.97929	0.0477834	0.150484	Up	Plcl1	947.823	2.32309	0.442511	5.2498	1.52262e-07	3.65094e-06	Up
Mfsd7c	1803.44	6.52348	0.486557	13.4074	5.46956e-41	5.72418e-39	Up	Mt2	32.8229	8.28178	2.22979	3.71416	0.000203883	0.00162557	Up	Plcxd2	219.903	7.3583	1.63	4.51428	6.35313e-06	0.000101527	Up
Mgat3	124.355	8.57132	2.02316	4.23661	2.26922e-05	0.000215761	Up	Mtap1a	1512.37	3.51066	1.49562	2.34729	0.0189104	0.0735935	Up	Pld3	477.937	1.46669	0.579751	2.52987	0.0114106	0.0632924	Up
Mgat4a	818.61	3.7051	0.557827	6.64202	3.09415e-11	7.47671e-10	Up	Mtap1b	6848.46	1.81485	0.737275	2.46157	0.013833	0.0573147	Up	Pld5	42.7449	8.73911	2.81569	3.10372	0.00191102	0.0147552	Up
Mgat4c	89.0175	9.5758	2.17554	4.40158	1.07466e-05	0.000109597	Up	Mtap2	281.807	2.6916	0.863639	3.11658	0.00182964	0.010794	Up	Plekhg1	6328.6	0.822262	0.205285	4.00546	6.18968e-05	0.000769968	Up
Mgat5b	32.9419	8.14203	2.5082	3.24617	0.0011697	0.00713145	Up	Mtap6	269.541	2.16194	0.837637	2.581	0.00985149	0.0437275	Up	Plekhh1	996.516	4.25144	1.10413	3.8505	0.000117878	0.0013505	Up
Mgea5	4272.5	0.76914	0.184379	4.17152	3.02579e-05	0.000280663	Up	Mtap7	1149.67	5.22553	0.46528	11.2309	2.87394e-29	2.03692e-27	Up	Plekhh2	413.53	2.29344	0.669032	3.428	0.00060805	0.00561101	Up
Mgst3	113.729	2.53126	1.23348	2.05213	0.0401572	0.132331	Up	Mtap7d2	264.997	9.82945	1.96333	5.00652	5.54241e-07	7.93306e-06	Up	Plekhm1	766.876	1.00663	0.425383	2.36642	0.0179611	0.0901074	Up
Miat	171.264	2.00421	0.904727	2.21526	0.026742	0.0964605	Up	Mtap9	246.88	5.33189	0.991354	5.37839	7.51553e-08	1.24156e-06	Up	Plod1	4043.52	1.21584	0.243289	4.99752	5.80714e-07	1.21289e-05	Up
Mical1	329.131	2.14481	0.788152	2.72132	0.00650227	0.0305581	Up	Mterfd2	254.193	1.16378	0.496765	2.34271	0.0191443	0.0742972	Up	Plp1	1620.65	10.9697	1.01046	10.8561	1.86448e-27	2.53469e-25	Up
Mif4gd	551.172	1.24631	0.513278	2.42814	0.0151766	0.0614965	Up	Mtmr6	3173.41	1.52357	0.168389	9.04789	1.45757e-19	6.59338e-18	Up	Pls3	9950.18	0.487355	0.178374	2.73221	0.00629118	0.0391457	Up
Minpp1	306.649	1.5712	0.579665	2.71053	0.0067176	0.0313371	Up	Mtmr7	95.0529	3.44984	0.945342	3.6493	0.000262951	0.00202716	Up	Pltp	8802.89	3.76488	0.167073	22.5344	1.91143e-112	1.61686e-109	Up
Mkl2	3835.97	1.80885	0.239027	7.56757	3.8028e-14	1.2098e-12	Up	Mtpap	922.071	1.40187	0.37783	3.71034	0.000206985	0.00164433	Up	Plxdc1	256.386	9.88935	1.99908	4.94695	7.53856e-07	1.52636e-05	Up
Mlc1	106.928	9.84036	1.93556	5.08399	3.69581e-07	5.10783e-06	Up	Mtpn	8054.4	0.537402	0.12746	4.21624	2.48414e-05	0.000250039	Up	Pm20d2	50.5756	8.98194	2.53853	3.53825	0.000402787	0.00396178	Up
Mlec	1020.73	1.4552	0.305796	4.75873	1.94817e-06	2.3315e-05	Up	Mtus1	3914.16	0.684128	0.166701	4.10392	4.06203e-05	0.000387075	Up	Pmaip1	1100.79	10.9899	1.10836	9.91547	3.56573e-23	4.02162e-21	Up
Mlf2	2543.07	1.04104	0.366314	2.84193	0.00448407	0.0224389	Up	Mtus2	210.914	5.75883	1.05364	5.46565	4.61215e-08	7.82082e-07	Up	Pmepa1	4278.87	1.96851	0.298521	6.59421	4.27525e-11	1.82339e-09	Up
Mllt11	985.529	3.61106	1.00717	3.58535	0.000336628	0.00240279	Up	Mtx2	690.458	1.33394	0.328078	4.06593	4.78412e-05	0.000449754	Up	Pms2	200.925	2.39904	1.14164	2.10139	0.0356064	0.151225	Up
Mllt3	862.023	1.31289	0.349298	3.75866	0.000170824	0.00132258	Up	Mtx3	389.559	1.05006	0.423409	2.48001	0.013138	0.0550387	Up	Pnck	18.6183	7.54	3.61679	2.08472	0.0370944	0.155432	Up
Mllt4	6848.54	1.09372	0.25246	4.33225	1.47595e-05	0.000145912	Up	Mxi1	1188.25	0.903879	0.291185	3.10414	0.00190835	0.0111768	Up	Pnpla6	2491.83	1.11556	0.470415	2.37144	0.017719	0.0890394	Up
Mlycd	277.837	1.67608	0.79126	2.11825	0.0341541	0.116548	Up	Myb	55.7539	2.48609	1.05854	2.34859	0.0188447	0.0733935	Up	Poc5	286.721	2.03677	0.912768	2.23143	0.0256529	0.118974	Up
Mmd2	102.24	9.77568	1.9447	5.02684	4.98641e-07	6.71417e-06	Up	Mycl1	272.256	5.30138	1.09135	4.85763	1.188e-06	1.61837e-05	Up	Podxl2	580.988	2.48914	0.832496	2.98997	0.00279003	0.0201523	Up
Mmp15	1863.65	1.9152	0.24651	7.76925	7.89521e-15	2.65654e-13	Up	Myh10	33768.1	2.95839	0.166494	17.7688	1.233e-70	2.34118e-68	Up	Pofut1	571.512	1.23102	0.576458	2.13549	0.0327209	0.14194	Up
Mmp17	191.472	2.89652	0.756113	3.8308	0.000127729	0.00102664	Up	Myo10	21481.4	1.03294	0.108616	9.51001	1.90653e-21	9.61391e-20	Up	Pold4	243.057	1.68368	0.715307	2.35379	0.0185831	0.0925569	Up
Mmp25	805.705	5.33326	0.425531	12.5332	4.9155e-36	4.57624e-34	Up	Myo16	178.884	10.7276	1.90271	5.63806	1.71972e-08	3.10073e-07	Up	Polr2b	2607.8	0.63137	0.259766	2.43054	0.0150765	0.0787223	Up
Mmrn1	990.327	7.04393	0.843747	8.3484	6.91947e-17	2.76324e-15	Up	Myo1b	11752.1	1.8184	0.130353	13.9498	3.1561e-44	3.56918e-42	Up	Polr2h	189.163	2.21871	0.802734	2.76394	0.00571074	0.0362904	Up
Moap1	41.3704	8.47139	2.60614	3.25055	0.00115183	0.00704513	Up	Myo1e	3940.73	0.652645	0.178225	3.66192	0.000250337	0.00194061	Up	Pomc	107.884	2.90546	1.45998	1.99007	0.0465836	0.183514	Up
Mob3b	213.029	3.16473	1.48775	2.12719	0.0334043	0.114427	Up	Myt1	49.1689	8.86516	2.01282	4.40435	1.06102e-05	0.000116311	Up	Pon2	4710.51	1.24044	0.316523	3.91897	8.89299e-05	0.00105538	Up
Mobp	195.207	10.7088	1.83651	5.83104	5.50815e-09	1.0132e-07	Up	Myt1l	112.98	4.76171	1.67576	2.84153	0.00448975	0.0229334	Up	Postn	91.1993	3.29018	1.56068	2.10817	0.0350163	0.149373	Up
Mog	34.737	8.21865	2.46302	3.33682	0.000847434	0.00540555	Up	N28178	44.869	8.73228	2.09576	4.16665	3.0911e-05	0.000306062	Up	Pot1a	299.974	2.01225	0.695777	2.89209	0.00382692	0.0263183	Up
Morf4l2	5879.78	0.779048	0.188813	4.12603	3.69075e-05	0.000336582	Up	Naa35	1491.92	0.603181	0.233794	2.57997	0.00988099	0.0438205	Up	Pou2af1	89.302	9.80228	2.13769	4.58546	4.52996e-06	7.56849e-05	Up
Morn2	27.2095	7.86679	2.75245	2.8581	0.0042618	0.0215074	Up	Nacc2	747.511	2.19243	0.468436	4.68031	2.86439e-06	3.6051e-05	Up	Pou3f2	41.6786	3.31321	1.61041	2.05737	0.0396503	0.162814	Up
Morn3	34.1402	8.19427	2.67447	3.06388	0.00218484	0.0121269	Up	Nalcn	193.089	10.8381	3.3197	3.26479	0.00109545	0.00697563	Up	Ppapdc2	907.761	1.7844	0.398714	4.47539	7.62726e-06	0.00011911	Up
Mosc2	2101.5	0.732289	0.336264	2.17772	0.0294268	0.10332	Up	Nampt	17144.3	4.26138	0.658798	6.46842	9.90334e-11	2.36511e-09	Up	Ppara	25.8116	8.01129	3.61373	2.2169	0.02663	0.122203	Up
Mospd1	1136.85	1.1719	0.291926	4.01436	5.96065e-05	0.000514521	Up	Nap1l2	108.597	22.7354	4.78517	4.75123	2.02184e-06	2.63525e-05	Up	Ppard	1740	3.44426	0.360089	9.56502	1.12178e-21	1.15407e-19	Up
Moxd1	13.7015	6.87598	3.47114	1.9809	0.0476024	0.150681	Up	Nap1l3	102.392	3.51944	1.73003	2.03433	0.0419187	0.136043	Up	Ppdpf	761.122	0.829166	0.420969	1.96966	0.0488774	0.189849	Up
Mpp6	628.438	1.77177	0.493898	3.58731	0.000334101	0.00238925	Up	Nap1l4	2834.55	0.429796	0.178759	2.40434	0.0162018	0.0652131	Up	Ppef1	43.1823	8.75436	2.58468	3.38702	0.000706556	0.00636193	Up
Mpp7	346.802	1.51956	0.618328	2.45753	0.0139895	0.0578293	Up	Nap1l5	245.945	6.02304	2.79656	2.15373	0.0312611	0.109123	Up	Ppfia2	208.485	9.58947	1.90122	5.04386	4.56241e-07	9.67385e-06	Up
Mpped2	94.0635	9.65553	1.91956	5.03009	4.90259e-07	6.60718e-06	Up	Napb	238.58	2.85253	0.959467	2.97303	0.00294873	0.0162317	Up	Ppfia3	64.4685	6.91857	2.05784	3.36205	0.00077367	0.00686779	Up
Mprip	11711.2	0.769102	0.162581	4.73057	2.23887e-06	2.6419e-05	Up	Napepld	329.27	4.53891	0.515475	8.8053	1.30507e-18	5.52948e-17	Up	Ppm1f	4607.03	0.679075	0.263349	2.57861	0.0099198	0.0563788	Up
Mpv17l	134.616	4.26026	0.990074	4.30297	1.68524e-05	0.000164778	Up	Nat8l	219.245	3.71836	1.24804	2.97935	0.00288863	0.015958	Up	Ppm1h	843.576	2.2253	0.701935	3.17023	0.00152316	0.0121741	Up
Mpzl1	6510.22	2.28478	0.149936	15.2383	1.96879e-52	2.76634e-50	Up	Nav3	155.529	2.80981	1.09176	2.57364	0.0100635	0.044489	Up	Ppm1l	928.471	1.55501	0.463082	3.35796	0.000785199	0.00695816	Up
Mrap2	31.4671	3.2926	1.67965	1.96028	0.0499626	0.156262	Up	Ncam1	1311.72	3.26196	1.19892	2.72075	0.00651336	0.0313146	Up	Ppp1r14c	83.4277	4.21487	2.01779	2.08885	0.0367212	0.154324	Up
Mro	19.1442	5.80963	2.64748	2.1944	0.0282068	0.100217	Up	Ncam2	183.469	7.65802	1.63389	4.687	2.77241e-06	3.50655e-05	Up	Ppp1r17	374.572	11.8709	3.4629	3.42803	0.000607989	0.00561101	Up
Mrpl16	262.055	1.84373	0.81569	2.26033	0.0238008	0.0878777	Up	Ncan	1230.44	8.4912	2.49513	3.40311	0.000666237	0.00453596	Up	Ppp1r3f	30.282	8.2423	2.92297	2.81983	0.00480488	0.0316296	Up
Msi2	2612.26	2.17733	0.276196	7.88327	3.18919e-15	1.11769e-13	Up	Nceh1	802.439	1.13229	0.49424	2.29098	0.0219648	0.0829004	Up	Ppp1r9a	1535.55	1.3701	0.352642	3.88526	0.00010222	0.00119265	Up
Msrb2	121.439	3.48586	0.953939	3.65417	0.000258017	0.00190469	Up	Nckap1	6248.69	0.60814	0.141578	4.29545	1.74337e-05	0.000181906	Up	Ppp2r2b	92.0343	8.40912	2.06138	4.07936	4.51602e-05	0.000581242	Up
Mta1	2319.82	0.504957	0.256348	1.96981	0.0488597	0.15335	Up	Ncoa1	1651.96	1.82797	0.207146	8.82457	1.09878e-18	4.68124e-17	Up	Ppp2r2c	546.426	9.99371	1.42108	7.03247	2.02909e-12	1.04023e-10	Up
Mta2	3562.46	0.57338	0.214889	2.66826	0.00762441	0.0349337	Up	Ncoa4	3177.78	1.65216	0.189147	8.7348	2.44087e-18	1.02013e-16	Up	Ppp4r1l-ps	68.8889	4.82597	1.95261	2.47155	0.0134531	0.0721508	Up
Mtap	544.772	1.30031	0.455097	2.85722	0.00427364	0.02156	Up	Ndfip1	2690.41	1.66293	0.185245	8.9769	2.78512e-19	1.2416e-17	Up	Ppt1	1271.64	0.770209	0.325876	2.3635	0.018103	0.0907295	Up
Mtap1a	1304.16	4.75908	1.97347	2.41153	0.0158857	0.0638247	Up	Ndfip2	1069.69	0.507539	0.250017	2.03002	0.0423546	0.137255	Up	Ppt2	1027.35	0.996755	0.426557	2.33675	0.0194524	0.0956663	Up
Mtap1b	5393.24	3.03558	0.463249	6.5528	5.64669e-11	1.32235e-09	Up	Ndrg2	531.758	2.11785	0.759329	2.78911	0.00528538	0.0262562	Up	Prcp	4061.2	2.40608	0.406689	5.91625	3.29363e-09	1.04914e-07	Up
Mtap2	220.258	10.883	1.82034	5.97854	2.25151e-09	4.34691e-08	Up	Ndrg4	1848.11	5.38078	1.47896	3.63822	0.000274527	0.0021069	Up	Prep	2008.1	0.732973	0.331358	2.21203	0.0269647	0.123292	Up
Mtap6	246.267	2.07	0.937235	2.20862	0.027201	0.0976519	Up	Ndst3	60.2937	3.1472	1.26945	2.47918	0.0131686	0.0550959	Up	Prepl	810.416	2.47602	0.592949	4.17578	2.96964e-05	0.00040156	Up
Mtap7	1015.03	6.21512	2.72378	2.2818	0.022501	0.0842679	Up	Ndufa3	255.116	1.37537	0.54432	2.52676	0.011512	0.0494844	Up	Prkcb	1572.95	4.2899	0.39996	10.7258	7.69957e-27	1.01942e-24	Up
Mtap7d2	239.635	11.0048	3.66991	2.99865	0.00271175	0.014591	Up	Ndufa4	472.744	1.27899	0.526812	2.4278	0.0151908	0.0618246	Up	Prkcc	513.323	4.97581	1.413	3.52144	0.000429207	0.00418649	Up
Mtap9	219.796	6.45951	1.39722	4.6231	3.78042e-06	4.25578e-05	Up	Ndufaf4	448.084	1.23122	0.507362	2.42671	0.0152366	0.0619781	Up	Prkg1	380.244	1.23253	0.594883	2.07189	0.0382758	0.158598	Up
Mterfd2	205.797	1.71295	0.651274	2.63015	0.00853464	0.0384313	Up	Ndufb11	1627.86	0.99046	0.205994	4.8082	1.52299e-06	2.03861e-05	Up	Prmt8	462.699	10.7409	1.91628	5.60511	2.08125e-08	5.84671e-07	Up
Mthfd1	656.343	1.76442	0.552009	3.19636	0.00139173	0.00826921	Up	Ndufb2	339.023	1.37091	0.437856	3.13095	0.00174242	0.0103629	Up	Prnd	6973.8	2.96165	0.295548	10.0209	1.23391e-23	1.4233e-21	Up
Mtmr2	2181.89	0.442211	0.222797	1.98482	0.0471647	0.149678	Up	Ndufb9	1371.11	0.873	0.253006	3.4505	0.000559542	0.00390638	Up	Prnp	5603.09	3.07369	0.19219	15.993	1.4303e-57	4.9495e-55	Up
Mtmr6	3269.65	0.869306	0.217823	3.99088	6.58284e-05	0.000564057	Up	Ndufc2	858.906	0.651705	0.329816	1.97596	0.048159	0.151222	Up	Prom1	4575.12	1.5587	0.26502	5.88143	4.06742e-09	1.27692e-07	Up
Mtmr7	78.4271	9.39317	2.02428	4.64026	3.47969e-06	3.93768e-05	Up	Ndufs4	745.248	1.06436	0.343033	3.10279	0.00191705	0.011215	Up	Prpf4	835.416	1.77708	0.564077	3.15043	0.00163031	0.0129153	Up
Mtpn	7515.27	0.401063	0.151602	2.6455	0.00815706	0.037072	Up	Ndufv1	1693.79	0.760454	0.204381	3.72078	0.000198611	0.00159262	Up	Prr18	481.857	5.5815	1.02617	5.43917	5.35304e-08	1.40044e-06	Up
Mtus2	219.088	2.5412	0.998462	2.54511	0.0109242	0.047173	Up	Ndufv2	1699.12	0.502915	0.213493	2.35564	0.0184906	0.072326	Up	Prr5	317.258	1.98257	0.774767	2.55892	0.0104997	0.0590359	Up
Mtx2	643.277	1.15157	0.397515	2.89693	0.00376837	0.0193531	Up	Nebl	837.966	2.48614	0.513316	4.8433	1.27702e-06	1.72892e-05	Up	Prrc2b	9383.89	0.384429	0.153569	2.50329	0.0123043	0.0671008	Up
Mtx3	291.484	2.08638	0.69241	3.01322	0.00258492	0.0140144	Up	Necab1	28.4716	8.0757	2.74904	2.93764	0.00330716	0.0178096	Up	Prrt2	40.6156	8.66573	2.65109	3.26874	0.00108027	0.00910755	Up
Mut	952.515	0.799695	0.358057	2.23343	0.0255206	0.0927826	Up	Necab2	83.9999	9.63685	1.91426	5.03425	4.79723e-07	6.98026e-06	Up	Prrt4	26.2698	8.03682	3.15891	2.54417	0.0109537	0.0612265	Up
Mvk	277.614	2.02418	0.611152	3.31208	0.000926062	0.00585786	Up	Necap2	1951.85	0.695471	0.219215	3.17255	0.00151109	0.00920051	Up	Prrx1	59.3481	4.71458	1.82355	2.58538	0.00972709	0.0555988	Up
Mxi1	1140.84	0.63794	0.298827	2.13481	0.0327762	0.112732	Up	Nedd8	1277.29	0.672959	0.325686	2.06628	0.038802	0.128504	Up	Psap	13556.9	0.371384	0.17499	2.12232	0.033811	0.14559	Up
Mycl1	238.512	10.998	1.63865	6.71164	1.92452e-11	4.72566e-10	Up	Nefh	534.176	4.19308	1.08987	3.84734	0.000119408	0.00101858	Up	Psd2	679.547	11.3033	3.0312	3.72898	0.000192254	0.00206728	Up
Mycn	287.311	1.69105	0.840038	2.01307	0.0441074	0.142229	Up	Nefl	809.222	8.36678	1.78494	4.68744	2.76644e-06	3.50188e-05	Up	Psd3	1070.07	2.11783	0.567404	3.7325	0.000189591	0.00204297	Up
Myef2	2172.12	0.486117	0.229143	2.12145	0.0338839	0.115855	Up	Nefm	1093.24	10.9662	2.02697	5.41015	6.29726e-08	1.05166e-06	Up	Psma8	61.7957	9.27121	2.31963	3.99686	6.41892e-05	0.00079459	Up
Myh10	28864	3.70673	0.167403	22.1426	1.22986e-108	4.91135e-106	Up	Negr1	198.05	2.82964	0.834106	3.39242	0.000692776	0.00468141	Up	Psme3	2369.3	0.713787	0.357288	1.99779	0.0457391	0.181103	Up
Myh14	37.1748	8.31589	2.63958	3.15046	0.00163016	0.00947442	Up	Nek6	674.622	0.693968	0.346878	2.00061	0.045434	0.144914	Up	Psors1c2	39.6824	8.63273	2.72274	3.17061	0.0015212	0.0121712	Up
Myh9	55400.4	0.335662	0.111169	3.01939	0.00253284	0.0137862	Up	Nelf	1360.26	1.34861	0.294121	4.58521	4.53532e-06	5.39886e-05	Up	Ptar1	347.541	1.52751	0.728501	2.09679	0.0360123	0.152354	Up
Myl12a	3507.07	0.715332	0.192547	3.7151	0.00020312	0.00154195	Up	Nell2	355.447	11.7185	3.07257	3.81392	0.000136779	0.00114392	Up	Pten	5560.37	0.402804	0.185168	2.17534	0.029605	0.131996	Up
Myl6	7338.24	0.982538	0.225773	4.35189	1.34972e-05	0.000134928	Up	Neo1	1400.45	1.91932	0.330576	5.806	6.39848e-09	1.23165e-07	Up	Ptgds	180.063	10.814	2.19696	4.92227	8.55452e-07	1.70486e-05	Up
Myo10	20617.3	0.751614	0.121231	6.19984	5.65211e-10	1.18796e-08	Up	Nes	17916.9	0.477267	0.132493	3.60221	0.000315529	0.00238117	Up	Ptges	802.671	5.57712	1.21161	4.60308	4.16289e-06	7.02707e-05	Up
Myo16	161.736	10.4374	2.01861	5.17059	2.33354e-07	3.3407e-06	Up	Net1	6506.05	1.53159	0.131928	11.6092	3.69862e-31	2.88755e-29	Up	Ptgfrn	4311.24	5.68287	0.258473	21.9863	3.89372e-107	3.1203e-104	Up
Myo1b	8906.67	3.55932	0.188518	18.8805	1.65061e-79	4.31861e-77	Up	Neu1	522.619	1.05535	0.372508	2.83308	0.00461014	0.0234471	Up	Ptgis	190.304	9.45585	1.72364	5.48599	4.11156e-08	1.09829e-06	Up
Myo1e	2550.39	2.46534	0.238215	10.3492	4.21919e-25	2.65669e-23	Up	Neurod1	139.943	5.89199	0.883773	6.66686	2.61336e-11	6.6326e-10	Up	Ptn	1398.68	2.99395	0.439337	6.8147	9.4461e-12	4.37162e-10	Up
Myo5a	913.806	2.76963	0.860747	3.21771	0.00129218	0.00776589	Up	Neurod2	57.2233	9.08298	2.0833	4.35989	1.30126e-05	0.000139661	Up	Ptplad1	2049.52	1.62622	0.392318	4.14517	3.39556e-05	0.000451141	Up
Myo5b	28.0258	7.90834	3.37456	2.34351	0.0191031	0.0741783	Up	Nf2	3576.39	0.436061	0.161144	2.70603	0.00680931	0.0323132	Up	Ptpn11	5639.04	1.43663	0.202227	7.10405	1.21149e-12	6.47235e-11	Up
Myof	582.787	3.78713	1.21896	3.10687	0.00189082	0.0107265	Up	Nfam1	32.8013	8.28021	2.30069	3.59901	0.000319428	0.00240942	Up	Ptpn5	31.22	8.28578	3.1058	2.66784	0.00763403	0.0459067	Up
Myt1	44.3769	7.07264	2.09937	3.36894	0.00075458	0.00489139	Up	Nfasc	842.594	12.9638	2.41757	5.36233	8.21534e-08	1.34417e-06	Up	Ptprb	35749.4	0.791857	0.14871	5.32484	1.01043e-07	2.52211e-06	Up
Myt1l	99.8901	6.12893	1.76568	3.47116	0.000518224	0.00351859	Up	Nfat5	6809.45	0.589478	0.163391	3.60777	0.000308837	0.00233941	Up	Ptprd	2353.12	4.16075	0.310164	13.4147	4.96087e-41	1.04909e-38	Up
N4bp3	1536.4	2.18576	0.270448	8.08201	6.37069e-16	2.3522e-14	Up	Nfia	8059.76	0.668557	0.127611	5.23901	1.61443e-07	2.51315e-06	Up	Ptpre	479.121	1.30186	0.655389	1.98639	0.0469904	0.184496	Up
Naa25	504.472	0.951345	0.449444	2.11672	0.034284	0.116886	Up	Ngfr	385.504	4.41325	1.1863	3.72018	0.000199079	0.00159554	Up	Ptprg	18624.9	1.69639	0.196423	8.6364	5.80114e-18	4.93453e-16	Up
Nacad	79.2177	9.40755	2.10067	4.47836	7.52204e-06	7.95449e-05	Up	Nhsl1	1957.04	0.958897	0.196689	4.87519	1.08704e-06	1.49141e-05	Up	Ptprj	660.28	1.8968	0.962155	1.97141	0.0486774	0.189265	Up
Nalcn	174.732	10.5489	2.11014	4.99918	5.75747e-07	7.63053e-06	Up	Nicn1	394.557	1.21167	0.433508	2.79504	0.00518939	0.0259048	Up	Ptprk	4470.51	1.35192	0.355969	3.79785	0.000145956	0.00163046	Up
Nampt	15427.1	4.1304	0.185432	22.2745	6.52724e-110	2.67705e-107	Up	Nid1	26708.9	0.855471	0.115842	7.38478	1.52703e-13	4.716e-12	Up	Ptprn	135.164	10.4002	2.30532	4.5114	6.44024e-06	0.00010268	Up
Nap1l1	6578.48	0.482208	0.149323	3.2293	0.00124092	0.00751734	Up	Nid2	5427.29	2.07345	0.182458	11.364	6.32035e-30	4.6289e-28	Up	Ptprr	410.324	2.77805	1.09792	2.53029	0.011397	0.06324	Up
Nap1l2	98.374	22.4716	3.19018	7.044	1.86805e-12	5.06207e-11	Up	Nipa1	339.98	1.14861	0.52951	2.1692	0.0300673	0.105772	Up	Ptprz1	1450.91	11.3982	1.29968	8.77	1.78666e-18	1.56343e-16	Up
Nap1l3	85.7562	6.9624	1.77378	3.92517	8.6667e-05	0.000725412	Up	Nkain2	24.5115	7.86	2.48232	3.1664	0.00154341	0.00936026	Up	Ptrf	8743.44	0.433215	0.153945	2.81409	0.0048916	0.0320067	Up
Nap1l5	220.964	6.95807	1.64227	4.23687	2.26656e-05	0.000215643	Up	Nkd1	4102.22	0.595552	0.16817	3.54136	0.000398064	0.0029098	Up	Pttg1ip	4392.72	0.699931	0.196798	3.55659	0.000375702	0.00372667	Up
Napepld	299.657	4.10051	1.2385	3.31086	0.000930102	0.00587851	Up	Nkd2	144.041	2.17327	0.689969	3.1498	0.00163381	0.00982332	Up	Pvalb	264.578	6.55385	1.58281	4.14064	3.46331e-05	0.000458942	Up
Nat8l	213.88	2.64836	1.33983	1.97663	0.0480829	0.151665	Up	Nlgn1	122.523	4.79646	1.67894	2.85683	0.00427892	0.0220321	Up	Pvrl1	483.063	2.68239	1.08181	2.47953	0.0131555	0.0708797	Up
Ncam1	1122.57	4.4504	0.947888	4.69507	2.66511e-06	3.09434e-05	Up	Nlgn3	156.235	2.82834	1.22475	2.30932	0.020926	0.0798614	Up	Pxk	2082.32	0.67567	0.310865	2.17351	0.0297417	0.132295	Up
Ncam2	166.014	7.56594	1.75868	4.30206	1.69216e-05	0.000165242	Up	Nlrc3	533.815	2.89653	0.50806	5.70117	1.18987e-08	2.21017e-07	Up	Pxmp2	20.8059	7.70104	3.36465	2.28881	0.0220904	0.105837	Up
Ncan	1117.72	6.86712	1.91147	3.59258	0.000327415	0.00234365	Up	Nme1	848.772	0.954914	0.281281	3.39487	0.000686603	0.00464787	Up	Pycr2	167.3	3.08864	1.11172	2.77825	0.00546532	0.0349789	Up
Ncaph	1233.74	2.34829	0.884847	2.6539	0.00795676	0.036303	Up	Nnat	186.404	2.61959	0.685018	3.82412	0.000131241	0.00110179	Up	Pygb	2333.28	1.18256	0.288286	4.10206	4.09489e-05	0.00053108	Up
Nck2	495.559	1.56041	0.448448	3.47958	0.000502195	0.00342753	Up	Nol4	101.601	6.03945	1.54349	3.91285	9.12119e-05	0.000800707	Up	Pygo1	39.2208	8.61494	3.00295	2.86883	0.00411991	0.0279669	Up
Nckap5	91.4992	8.19738	1.93929	4.22701	2.36818e-05	0.000224187	Up	Nomo1	8132.08	3.3364	0.13285	25.114	3.49591e-139	2.2403e-136	Up	Qars	2584.95	0.586978	0.238297	2.46322	0.0137696	0.0734149	Up
Ncoa1	1610.15	1.34829	0.248854	5.418	6.02693e-08	9.47759e-07	Up	Nos2	968.043	1.19837	0.39134	3.06223	0.00219697	0.0126457	Up	Qk	29539.3	1.198	0.140556	8.52335	1.55007e-17	1.24875e-15	Up
Ncoa4	3036.49	1.30305	0.310592	4.19536	2.72433e-05	0.000255195	Up	Nos3	4767.02	2.23869	0.16051	13.9474	3.26287e-44	3.66299e-42	Up	Rab11fip1	1572.76	4.28693	1.69607	2.52757	0.0114855	0.0636356	Up
Ncrna00086	48.0389	8.6858	2.55468	3.39996	0.000673965	0.00442937	Up	Notum	1188.1	12.0176	1.44857	8.29621	1.07482e-16	4.12237e-15	Up	Rab12	2989.27	1.46101	0.293266	4.98187	6.29741e-07	1.30455e-05	Up
Ndrg2	478.518	2.14339	0.854791	2.5075	0.0121588	0.051539	Up	Nova2	2009.5	0.381641	0.186852	2.04247	0.0411048	0.134262	Up	Rab15	99.8608	8.5041	1.98943	4.27464	1.91447e-05	0.000270405	Up
Ndrg4	1661.13	5.84275	1.49178	3.91663	8.97946e-05	0.000747467	Up	Nox4	319.848	2.59921	0.59319	4.38176	1.17726e-05	0.000127689	Up	Rab18	3270.07	0.498056	0.240742	2.06884	0.0385611	0.159417	Up
Ndst3	48.9036	8.7116	2.35755	3.69519	0.000219723	0.00165228	Up	Noxo1	277.089	2.58037	0.825372	3.12631	0.00177015	0.010499	Up	Rab2b	1003.32	0.915671	0.413572	2.21405	0.0268252	0.122763	Up
Ndufb11	1502.84	0.86932	0.269702	3.22326	0.00126742	0.00764429	Up	Npas3	139.291	10.3671	1.6503	6.28195	3.34347e-10	7.49601e-09	Up	Rab3a	356.781	3.54412	1.61058	2.20053	0.0277695	0.126026	Up
Ndufs2	2375.86	0.615433	0.280505	2.19402	0.0282343	0.100217	Up	Npcd	481.375	2.29611	0.962726	2.38501	0.0170787	0.0680495	Up	Rab3c	389.593	4.01028	1.26563	3.1686	0.00153174	0.0122234	Up
Ndufv1	1493.55	0.828817	0.333898	2.48225	0.0130556	0.054473	Up	Nphp1	313.036	1.37353	0.500284	2.7455	0.0060419	0.0294811	Up	Rab3gap1	1516.68	0.723851	0.325407	2.22445	0.0261183	0.120581	Up
Nebl	646.948	6.22832	0.949046	6.56272	5.28353e-11	1.24499e-09	Up	Nptn	3224.41	1.46016	0.378201	3.86081	0.000113012	0.000969795	Up	Rab5b	3979.83	1.10887	0.248965	4.4539	8.43248e-06	0.000130613	Up
Necab2	75.7535	9.34304	2.10172	4.44543	8.77159e-06	9.12329e-05	Up	Nptxr	28.1104	8.05765	3.69082	2.18316	0.029024	0.102999	Up	Rab6a	5446.03	0.527793	0.192926	2.73574	0.0062241	0.0388394	Up
Necap1	767.66	0.923933	0.461666	2.0013	0.0453599	0.145096	Up	Nr3c1	3076.21	0.369259	0.180276	2.04829	0.0405315	0.132746	Up	Rab6b	389.659	4.21776	1.38578	3.04361	0.00233759	0.0174139	Up
Nefh	479.362	4.43528	1.43333	3.09439	0.00197219	0.0111128	Up	Nras	5434.25	0.377695	0.155123	2.4348	0.0148998	0.0608657	Up	Rab7l1	161.102	4.85879	1.42067	3.42007	0.000626058	0.00575936	Up
Nefl	730.04	11.1085	2.32898	4.76968	1.84516e-06	2.22401e-05	Up	Nrip1	1817.13	1.70178	0.275268	6.18229	6.31791e-10	1.36474e-08	Up	Rabep1	2267.06	0.767248	0.33093	2.31846	0.0204243	0.099355	Up
Nefm	990.196	8.61108	2.48116	3.47059	0.000519322	0.00352447	Up	Nrip3	192.092	3.36075	1.00791	3.33439	0.00085488	0.00560924	Up	Rabl5	76.9387	8.14984	2.013	4.0486	5.15247e-05	0.000652675	Up
Negr1	156.585	10.3907	1.83916	5.64971	1.60722e-08	2.75589e-07	Up	Nrn1	87.8839	9.70219	1.82807	5.30733	1.1124e-07	1.78402e-06	Up	Rac3	24.7397	7.95012	3.30539	2.4052	0.0161636	0.083116	Up
Nek3	121.279	2.30445	0.982229	2.34614	0.018969	0.0737735	Up	Nrp2	3658.73	0.504545	0.232549	2.16963	0.0300347	0.105682	Up	Ralgps1	50.3271	8.97471	2.82731	3.17429	0.00150205	0.0120497	Up
Nelf	1085.94	2.0532	0.34482	5.95442	2.61002e-09	5.0199e-08	Up	Nrsn1	34.0925	6.90208	2.20722	3.12704	0.00176575	0.0104773	Up	Ralyl	32.6058	8.34845	3.05271	2.73477	0.00624241	0.0389177	Up
Nell1	136.461	22.9273	4.78504	4.79144	1.65587e-06	2.01345e-05	Up	Nrsn2	80.1805	9.56975	2.24467	4.26333	2.01406e-05	0.000206923	Up	Ramp2	4009.58	0.92982	0.273065	3.40512	0.00066134	0.00601886	Up
Neo1	1216.06	2.15219	0.355764	6.04948	1.45318e-09	2.89017e-08	Up	Nrxn1	703.014	3.28628	0.811709	4.04859	5.15265e-05	0.00048029	Up	Rap1gap	113.475	10.1478	2.39968	4.22882	2.3492e-05	0.000324381	Up
Nes	10712.6	2.77365	0.147893	18.7544	1.78218e-78	4.58382e-76	Up	Nrxn2	757.902	4.32404	0.909755	4.75298	2.00441e-06	2.62142e-05	Up	Rap1gds1	2911.95	0.868511	0.260453	3.33461	0.000854191	0.00747322	Up
Net1	4988.78	2.72475	0.231922	11.7486	7.18322e-32	5.73713e-30	Up	Nrxn3	499.738	3.54838	0.953078	3.72307	0.000196813	0.00157911	Up	Rapgef6	3137.06	1.03794	0.266387	3.89637	9.76437e-05	0.00114188	Up
Neto2	368.178	10.1608	1.73949	5.84124	5.18145e-09	9.57716e-08	Up	Nsg2	659.771	11.1609	1.61814	6.89736	5.29778e-12	1.44339e-10	Up	Raph1	4697.04	0.879863	0.266277	3.30432	0.000952086	0.00818547	Up
Neurod1	123.338	10.0468	1.77938	5.64624	1.63992e-08	2.80561e-07	Up	Nt5dc3	708.824	0.962276	0.342286	2.81133	0.00493379	0.0248467	Up	Rasgrp3	17322.8	0.517631	0.224609	2.30458	0.0211899	0.102392	Up
Neurod2	51.9981	7.2989	2.14686	3.39981	0.000674327	0.00442983	Up	Ntm	384.541	11.8318	1.63391	7.24141	4.44046e-13	1.31588e-11	Up	Rasgrp4	592.481	2.70812	0.961408	2.81683	0.00485008	0.0318066	Up
Nf2	3091.63	0.566865	0.241013	2.35202	0.018672	0.0729712	Up	Nudt12	110.655	3.87327	1.3537	2.86125	0.00421968	0.0217489	Up	Rasl12	36.7179	8.51995	2.81657	3.02494	0.00248686	0.0183365	Up
Nfasc	760.769	12.6715	2.43507	5.20376	1.953e-07	2.83335e-06	Up	Nudt9	1752.57	0.732739	0.252662	2.90007	0.00373076	0.0196235	Up	Rassf2	1696.75	3.49063	0.379118	9.20723	3.34637e-20	3.28721e-18	Up
Nfatc4	158.002	1.53296	0.772271	1.98501	0.0471436	0.149678	Up	Nus1	2854.93	0.709722	0.193729	3.66348	0.000248814	0.00193106	Up	Rassf3	3760.87	1.05143	0.358591	2.93211	0.00336669	0.0236088	Up
Nfia	7293.88	0.633098	0.175678	3.60375	0.000313658	0.00225574	Up	Nxn	732.915	1.35625	0.351607	3.8573	0.000114647	0.000981231	Up	Rassf8	1552.14	1.8527	0.338526	5.47285	4.42858e-08	1.17446e-06	Up
Ngef	28.7249	7.94462	2.62811	3.02294	0.0025033	0.0136646	Up	Nxph3	28.7234	6.60392	2.12835	3.10283	0.00191677	0.011215	Up	Rassf9	4147.46	1.37214	0.2572	5.33492	9.55863e-08	2.40165e-06	Up
Ngfr	358.167	3.74427	1.20679	3.10267	0.00191784	0.0108473	Up	Nxph4	97.5455	22.5847	4.78521	4.71969	2.36206e-06	3.04004e-05	Up	Rbbp7	6100.79	0.433883	0.198278	2.18825	0.0286512	0.128716	Up
Ngfrap1	699.014	1.06823	0.419138	2.54864	0.0108145	0.0468215	Up	Oaz1	475.521	1.69477	0.581809	2.91294	0.00358043	0.0189886	Up	Rbfox1	123	10.2641	2.07033	4.95772	7.13244e-07	1.4538e-05	Up
Nhp2	820.897	0.721812	0.359033	2.01043	0.0443855	0.142762	Up	Ociad1	2950.59	0.482511	0.213389	2.26119	0.0237478	0.0882437	Up	Rbm20	161.087	10.654	1.89996	5.60747	2.05311e-08	5.77831e-07	Up
Nhsl1	1679.21	1.15431	0.272929	4.22933	2.34388e-05	0.000222024	Up	Ocln	3214.37	1.57735	0.157162	10.0364	1.05443e-23	6.02869e-22	Up	Rbms3	1275.1	1.83066	0.456453	4.01062	6.05602e-05	0.000755192	Up
Nicn1	332.983	1.53174	0.663968	2.30695	0.0210576	0.0799273	Up	Odc1	3938.22	1.71518	0.270187	6.34811	2.17974e-10	5.01862e-09	Up	Rc3h2	2991.97	0.801846	0.261638	3.06471	0.00217881	0.0164149	Up
Nid2	5391.31	1.43036	0.164789	8.67996	3.9591e-18	1.71655e-16	Up	Odz1	79.7034	9.56107	2.07858	4.59981	4.22886e-06	5.07332e-05	Up	Rcan3	1293.9	2.12662	0.376137	5.65384	1.56905e-08	4.55728e-07	Up
Nipal2	36.0509	8.27243	2.44546	3.38277	0.000717591	0.00467559	Up	Odz2	395.405	11.8722	3.75369	3.1628	0.00156259	0.00945238	Up	Rdh9	21.6876	7.7613	3.73898	2.07578	0.0379144	0.157513	Up
Nipal3	868.635	2.1201	0.450542	4.70567	2.53028e-06	2.95361e-05	Up	Odz3	613.728	5.79807	2.37634	2.43992	0.0146905	0.0601384	Up	Reep1	2297.76	2.6072	0.496365	5.25258	1.49987e-07	3.60774e-06	Up
Nipsnap1	165.173	3.50362	1.05124	3.33283	0.000859663	0.00547436	Up	Ogt	2345.54	0.473785	0.235193	2.01446	0.0439618	0.141265	Up	Reep3	9750.2	0.449132	0.19366	2.31918	0.020385	0.0992271	Up
Nisch	7735.94	0.448384	0.171601	2.61296	0.00897631	0.0401224	Up	Ola1	1586.99	0.940654	0.218276	4.30947	1.63647e-05	0.00017239	Up	Rell1	4281.16	0.811949	0.270195	3.00505	0.00265538	0.0193707	Up
Nit1	150.838	2.44746	1.05397	2.32213	0.0202258	0.0775656	Up	Olfm3	42.526	8.65499	3.38677	2.55553	0.0106026	0.0463395	Up	Rell2	107.619	7.01814	1.69863	4.13164	3.60186e-05	0.000473184	Up
Nkain4	38.9602	8.38465	2.44991	3.42243	0.000620635	0.00412714	Up	Olfr520	17.4976	7.37527	3.01449	2.44661	0.0144209	0.0592079	Up	Rere	7395.93	0.703209	0.242193	2.90351	0.00369007	0.0254819	Up
Nkd1	2421.29	3.40159	0.236972	14.3544	1.0004e-46	1.25463e-44	Up	Olig1	68.0914	9.33398	1.9378	4.8168	1.45881e-06	1.95781e-05	Up	Resp18	25.5717	6.55555	2.69245	2.43479	0.0149003	0.0779898	Up
Nkd2	105.735	9.82455	1.83103	5.36558	8.06895e-08	1.24185e-06	Up	Olig2	26.5065	7.97362	2.38494	3.34333	0.000827806	0.00545944	Up	Ret	536.152	5.4687	0.920877	5.93858	2.87497e-09	9.31367e-08	Up
Nlgn1	106.964	9.8408	2.15102	4.57494	4.76357e-06	5.26108e-05	Up	Opcml	249.447	2.49547	1.13865	2.1916	0.0284085	0.101398	Up	Rffl	142.453	6.06655	1.5247	3.97884	6.92512e-05	0.000848285	Up
Nlgn3	133.395	3.67532	1.8616	1.97428	0.0483501	0.152317	Up	Ophn1	1051.68	1.03289	0.288834	3.57605	0.000348828	0.00260298	Up	Rfx4	37.7149	8.55859	2.7968	3.06014	0.00221233	0.0166345	Up
Nme1	793.302	0.788583	0.371091	2.12504	0.0335833	0.114964	Up	Oplah	295.08	1.67527	0.598733	2.79802	0.00514171	0.0257002	Up	Rgl2	1837.88	0.572125	0.287594	1.98935	0.0466627	0.183731	Up
Nme5	29.1961	7.96817	2.62076	3.04041	0.00236256	0.0129757	Up	Oprl1	56.9101	9.07504	2.27806	3.98367	6.78577e-05	0.000611753	Up	Rgma	62.3046	9.2829	2.36199	3.93013	8.49017e-05	0.0010131	Up
Nme6	32.4501	5.77596	2.11017	2.73719	0.00619659	0.029367	Up	Orai1	385.721	0.860606	0.40486	2.12569	0.0335292	0.114979	Up	Rgs3	4794.71	0.521758	0.265633	1.96421	0.0495061	0.191266	Up
Nmt2	505.37	1.20936	0.429865	2.81336	0.0049027	0.0241711	Up	Ormdl3	736.984	1.80796	0.343952	5.25645	1.46866e-07	2.3049e-06	Up	Rgs5	918.131	2.36446	0.826501	2.86081	0.00422566	0.0285955	Up
Nnat	148.545	4.85386	0.864559	5.61426	1.97403e-08	3.32844e-07	Up	Osbpl10	107.976	2.14471	0.91698	2.33888	0.0193416	0.0748737	Up	Rgs6	82.0531	9.68041	2.12096	4.56416	5.01497e-06	8.28177e-05	Up
Nol4	90.3314	9.59694	2.09678	4.57699	4.71717e-06	5.21362e-05	Up	Osbpl1a	934.438	1.81167	0.395219	4.58397	4.56229e-06	5.42676e-05	Up	Rgs7	64.5936	9.33481	2.62331	3.55841	0.000373105	0.00371208	Up
Nomo1	7322.23	3.26551	0.160225	20.3807	2.47934e-92	8.17911e-90	Up	Osgin1	35.1311	8.38068	2.38894	3.50812	0.00045129	0.00323773	Up	Rgs8	887.253	10.6966	1.49644	7.14804	8.80285e-13	4.75292e-11	Up
Nos1ap	30.2524	8.01946	2.59158	3.09442	0.00197196	0.0111128	Up	Osmr	2573.05	3.09584	0.309634	9.99841	1.54865e-23	8.72463e-22	Up	Rhbdf1	1563.65	0.823698	0.411879	1.99985	0.0455161	0.180429	Up
Nos2	605.419	8.02996	0.829993	9.67473	3.86095e-22	2.09999e-20	Up	Ostc	979.049	1.22148	0.372902	3.2756	0.00105438	0.00673994	Up	Rhbdl1	36.9075	8.52732	2.84742	2.99476	0.00274662	0.0198764	Up
Nos3	5085.29	1.17714	0.228073	5.16124	2.4532e-07	3.4988e-06	Up	Ostf1	2895.93	0.842367	0.235442	3.57781	0.000346479	0.00259059	Up	Rhobtb1	1299.5	1.84664	0.339767	5.43501	5.47928e-08	1.431e-06	Up
Notch2	524.19	2.01972	0.650178	3.10642	0.0018937	0.0107388	Up	Pabpc1	21314.2	0.304164	0.139511	2.18021	0.0292418	0.103388	Up	Rhoj	3530.75	0.90756	0.400256	2.26745	0.0233627	0.111093	Up
Notch3	180.741	2.58942	1.29809	1.99479	0.0460658	0.146966	Up	Pabpc5	15.7031	7.21703	3.25643	2.21624	0.0266751	0.0965325	Up	Rhou	113.706	2.9833	1.25513	2.37688	0.0174599	0.088097	Up
Notch4	3921.6	0.640788	0.208883	3.06769	0.00215724	0.012	Up	Pacsin1	80.7155	6.61456	1.83116	3.61223	0.000303572	0.00230316	Up	Rian	1142.92	7.40997	0.99982	7.4113	1.25069e-13	7.35249e-12	Up
Notum	1080.47	5.98104	0.683008	8.75692	2.00665e-18	8.95617e-17	Up	Pafah1b1	6071.76	0.525948	0.2061	2.55191	0.0107134	0.0467573	Up	Ribc1	19.7339	7.625	3.50724	2.17408	0.0296993	0.132257	Up
Nova2	1640.61	0.716253	0.273409	2.61972	0.00880032	0.0394753	Up	Pafah1b2	4179.55	0.593993	0.160376	3.70375	0.000212438	0.00167811	Up	Rictor	2227.01	0.929442	0.263103	3.53262	0.000411467	0.00403672	Up
Noxo1	242.908	2.79937	0.668884	4.18514	2.84994e-05	0.000265977	Up	Pak1	185.663	2.51428	0.937853	2.68089	0.00734271	0.0343568	Up	Rimkla	31.08	6.83879	2.57944	2.65127	0.0080189	0.0478619	Up
Npas3	129.522	4.74016	1.10605	4.28565	1.82207e-05	0.000176564	Up	Pak2	3384.35	0.340055	0.154624	2.19925	0.0278605	0.0998355	Up	Rims1	51.767	9.01553	2.52226	3.57438	0.000351056	0.00353048	Up
Npnt	557.172	2.92448	0.452024	6.46975	9.81656e-11	2.23338e-09	Up	Pak3	126.87	4.71991	1.64729	2.86526	0.00416668	0.0215218	Up	Rims2	94.6361	9.88593	2.15184	4.59417	4.34475e-06	7.2975e-05	Up
Nptx1	241.719	8.47337	1.69366	5.003	5.64451e-07	7.49625e-06	Up	Pak6	43.8071	2.71202	1.27119	2.13345	0.0328877	0.113284	Up	Rit2	46.194	8.85118	2.62732	3.3689	0.000754693	0.00672772	Up
Nr2c1	539.994	0.825959	0.410401	2.01257	0.0441602	0.142274	Up	Panx2	50.2028	8.8941	2.16634	4.10559	4.03287e-05	0.000384536	Up	Rlbp1	27.1334	5.56087	2.54114	2.18834	0.028645	0.128716	Up
Nrarp	1069.56	0.613634	0.311378	1.9707	0.0487577	0.153125	Up	Papss2	295.305	2.6558	0.485789	5.46698	4.57763e-08	7.77771e-07	Up	Rnaset2b	139.576	23.0717	3.15855	7.30451	2.78273e-13	1.58689e-11	Up
Nrcam	356.05	11.5761	2.99994	3.85878	0.000113956	0.000928676	Up	Paqr7	509.839	2.08331	0.478168	4.35685	1.31947e-05	0.000141418	Up	Rnf103	1177.03	1.11839	0.424382	2.63533	0.00840557	0.0496857	Up
Nrg2	20.7798	7.47661	3.18606	2.34666	0.0189423	0.0737429	Up	Paqr8	459.938	1.15937	0.444485	2.60835	0.00909792	0.0410461	Up	Rnf112	28.0444	8.13115	3.07981	2.64015	0.00828695	0.0491918	Up
Nrip1	1742.67	1.32735	0.33416	3.9722	7.12123e-05	0.000606083	Up	Paqr9	51.5612	6.40357	1.94439	3.29336	0.000989979	0.00638669	Up	Rnf144b	1015.87	2.58509	0.789568	3.27405	0.00106017	0.00897402	Up
Nrip3	170.559	3.65483	1.52636	2.39447	0.0166442	0.0662928	Up	Parp6	649.891	0.688798	0.32988	2.08803	0.0367955	0.123347	Up	Rnf2	1522.73	0.940249	0.340501	2.76137	0.00575597	0.0365168	Up
Nrk	222.688	4.13589	1.18147	3.50063	0.000464157	0.00319727	Up	Parvb	10521.5	1.09571	0.164631	6.65553	2.82281e-11	7.15236e-10	Up	Rnf220	1151.14	0.924823	0.449471	2.05758	0.0396306	0.162777	Up
Nrn1	79.116	9.40581	2.01074	4.6778	2.89974e-06	3.33867e-05	Up	Pcca	1112.54	1.18749	0.302692	3.92309	8.74197e-05	0.000770496	Up	Rnf43	21.5835	7.754	3.32244	2.33383	0.0196047	0.0961357	Up
Nrsn1	30.5458	8.03253	2.73588	2.93599	0.00332482	0.017368	Up	Pcdh10	218.895	3.43761	0.938694	3.66212	0.000250135	0.00194003	Up	Rnf44	2446.09	0.543068	0.276194	1.96625	0.0492692	0.190812	Up
Nrsn2	72.5645	9.28097	2.44144	3.80144	0.000143858	0.00114236	Up	Pcdh11x	25.6267	7.9241	2.46818	3.2105	0.00132503	0.00821733	Up	Rnpep	1563.8	0.772487	0.297799	2.59399	0.00948688	0.0544468	Up
Nrxn1	584.233	6.15544	1.07753	5.71255	1.11293e-08	1.95471e-07	Up	Pcdh12	8088.85	0.280839	0.136085	2.06371	0.0390455	0.129144	Up	Rock2	7244.04	0.408716	0.181744	2.24886	0.0245212	0.11552	Up
Nrxn2	685.964	4.29549	0.958064	4.48351	7.34261e-06	7.77558e-05	Up	Pcdh15	44.2655	5.14492	1.71014	3.00848	0.00262554	0.0147268	Up	Ror1	132.377	6.87228	1.50493	4.56652	4.95888e-06	8.19803e-05	Up
Nsg1	1332.37	4.8351	0.872503	5.54164	2.9965e-08	4.93723e-07	Up	Pcdh19	2576.03	4.60879	0.226389	20.3578	3.95746e-92	1.19345e-89	Up	Ror2	18.7671	6.1059	2.98416	2.0461	0.0407465	0.166151	Up
Nsg2	597.605	8.21475	1.08074	7.60103	2.93786e-14	9.48554e-13	Up	Pcdh9	299.148	5.58995	2.61149	2.14053	0.0323122	0.111903	Up	Rora	555.501	1.93481	0.875481	2.20999	0.0271056	0.123714	Up
Nsmce1	675.534	1.43265	0.539108	2.65745	0.00787349	0.035988	Up	Pcdha10	71.0702	5.84933	1.55656	3.75785	0.00017138	0.00139682	Up	Rph3a	90.0044	5.74072	1.60032	3.58723	0.000334207	0.0033834	Up
Nsun2	1183.32	0.981261	0.332889	2.94771	0.00320135	0.0167924	Up	Pcdha11	31.6895	8.23103	2.25394	3.65183	0.000260377	0.00201135	Up	Rpl38	3673.73	1.31954	0.351317	3.75598	0.000172663	0.00189681	Up
Nsun5	132.756	5.92755	1.04796	5.65625	1.54714e-08	2.65587e-07	Up	Pcdha12	28.1104	8.05765	3.69082	2.18316	0.029024	0.102999	Up	Rprd1a	427.404	1.67618	0.636823	2.6321	0.0084858	0.0499439	Up
Ntm	347.478	9.04464	1.34036	6.7479	1.50001e-11	3.73772e-10	Up	Pcdha2	28.3507	8.06993	3.68372	2.1907	0.0284734	0.101535	Up	Rps6ka1	1056.24	0.728974	0.369263	1.97413	0.0483667	0.18849	Up
Ntn1	44.771	4.93542	1.95845	2.52007	0.0117333	0.0500959	Up	Pcdha3	58.1429	9.10631	3.20232	2.84366	0.00445989	0.0228036	Up	Rragb	100.609	9.97417	2.32145	4.29653	1.7349e-05	0.000247801	Up
Ntrk3	89.2827	8.09026	2.04183	3.96227	7.42419e-05	0.000628695	Up	Pcdha4	38.9221	8.52721	3.4456	2.47481	0.0133307	0.0556684	Up	Rras2	1213.68	2.4379	0.557343	4.37414	1.21909e-05	0.000182337	Up
Nucks1	5955.93	0.408233	0.188907	2.16103	0.0306931	0.106803	Up	Pcdha5	65.1104	9.26962	3.14356	2.94877	0.00319045	0.0173083	Up	Rsph1	47.1209	8.87996	2.55139	3.48043	0.000500601	0.00476087	Up
Nudt10	21.5127	7.52717	2.90906	2.5875	0.00966763	0.0426472	Up	Pcdha6	34.1642	5.96776	3.04076	1.96259	0.0496944	0.154936	Up	Rtn1	1200.8	3.73342	0.875963	4.26207	2.0254e-05	0.000283445	Up
Nudt11	66.345	9.15174	2.13433	4.28787	1.80397e-05	0.000175145	Up	Pcdha9	30.7533	8.1873	3.61867	2.26252	0.0236655	0.0879594	Up	Rtn3	5391.85	1.0399	0.293878	3.53856	0.000402322	0.00395977	Up
Nudt14	58.6454	3.71726	1.46138	2.54365	0.01097	0.0473194	Up	Pcdhb16	708.121	0.703956	0.307351	2.2904	0.0219982	0.0830058	Up	Rundc3b	96.1649	9.90935	2.03446	4.87074	1.1118e-06	2.15373e-05	Up
Nup210	1392.7	1.37484	0.420552	3.26914	0.00107877	0.00668175	Up	Pcdhb18	430.999	0.983286	0.4669	2.10599	0.0352053	0.119132	Up	Rwdd2b	134.222	1.99328	0.958621	2.07932	0.037588	0.15667	Up
Nus1	2768.16	0.427428	0.217244	1.9675	0.0491253	0.154088	Up	Pcdhb20	524.718	0.882178	0.442611	1.99312	0.0462479	0.146961	Up	Ryr2	98.7982	3.64514	1.12854	3.22997	0.00123805	0.0102282	Up
Nwd1	42.7976	8.5191	2.64097	3.22575	0.00125642	0.00759083	Up	Pcdhga1	227.373	2.2764	0.687241	3.31237	0.000925076	0.00601847	Up	Samd10	156.555	2.72631	1.27152	2.14414	0.0320217	0.139883	Up
Nxph3	25.4563	7.7703	2.73721	2.83877	0.00452876	0.0226214	Up	Pcdhga10	556.024	1.8796	0.430937	4.36167	1.29073e-05	0.000138627	Up	Samd5	262.833	4.42836	1.63855	2.70262	0.00687958	0.0420676	Up
Nxph4	88.3625	22.3209	3.24483	6.8789	6.03156e-12	1.55927e-10	Up	Pcdhga6	351.761	1.20114	0.433576	2.7703	0.00560044	0.0275808	Up	Samd8	1486.52	1.67676	0.424447	3.95045	7.80059e-05	0.000941352	Up
Ociad1	2587.39	0.56198	0.23312	2.41069	0.0159223	0.0639379	Up	Pclo	375.443	5.5457	1.33308	4.16007	3.18154e-05	0.000313868	Up	Samsn1	168.953	3.74345	1.17888	3.17543	0.00149616	0.0120139	Up
Ocln	2163.59	8.88124	1.42379	6.23777	4.43864e-10	9.47347e-09	Up	Pcmtd1	2244.36	0.729906	0.269844	2.70492	0.00683208	0.0324113	Up	Sarm1	51.3532	9.00397	2.51871	3.57483	0.000350459	0.00352683	Up
Odc1	4590.69	0.518924	0.21307	2.43546	0.0148728	0.0605566	Up	Pcnxl2	52.1364	8.94898	3.26275	2.74278	0.00609223	0.0296715	Up	Sat2	30.3569	5.82566	2.43037	2.39702	0.016529	0.0844817	Up
Odz3	553.727	6.09181	3.06663	1.98648	0.0469796	0.149302	Up	Pcp2	298.433	11.4663	3.15107	3.63886	0.000273852	0.00210277	Up	Sc4mol	462.258	1.41573	0.592952	2.3876	0.0169587	0.0861573	Up
Odz4	165.06	8.10871	1.63722	4.95274	7.31762e-07	9.46674e-06	Up	Pcp4	1053.83	10.9151	2.07951	5.24888	1.53028e-07	2.39915e-06	Up	Sc5d	100.729	3.55696	1.55545	2.28678	0.0222089	0.10629	Up
Ogfrl1	601.165	1.9898	0.424133	4.69145	2.71274e-06	3.14243e-05	Up	Pcp4l1	526.567	3.9971	0.61404	6.50952	7.5393e-11	1.82893e-09	Up	Scamp1	3329.18	1.96807	0.354855	5.54613	2.92067e-08	7.98442e-07	Up
Ogt	1884.41	0.881237	0.272641	3.23222	0.00122832	0.00745291	Up	Pcsk1	26.6688	7.98168	3.73548	2.13672	0.0326207	0.112616	Up	Scamp5	243.391	5.46214	1.75847	3.10618	0.00189521	0.0146406	Up
Ola1	1242.96	1.61048	0.381377	4.22279	2.41292e-05	0.000227996	Up	Pcsk1n	26.8814	6.56257	2.82203	2.32548	0.0200464	0.0769822	Up	Scara3	31.9427	8.31882	3.04291	2.73384	0.00626011	0.0389842	Up
Olig1	61.3392	9.03859	2.15888	4.18671	2.83032e-05	0.000264471	Up	Pcsk2	149.149	5.92614	1.52423	3.88796	0.00010109	0.0008779	Up	Scarb1	4028.1	0.899273	0.275154	3.26825	0.00108215	0.00911329	Up
Olig2	23.7471	7.67004	2.80464	2.73477	0.00624247	0.0295291	Up	Pcsk6	221.684	3.52085	0.772246	4.55924	5.13396e-06	6.03672e-05	Up	Sccpdh	855.718	1.34083	0.417479	3.21173	0.00131938	0.0107716	Up
Omg	155.911	3.03857	1.31568	2.3095	0.0209157	0.0796077	Up	Pcx	1301.23	4.02554	1.32398	3.04049	0.00236192	0.0134443	Up	Scd2	12038.1	1.85502	0.170186	10.9	1.15313e-27	1.59614e-25	Up
Opcml	191.712	10.6828	2.06414	5.1754	2.27425e-07	3.26198e-06	Up	Pdcd10	1646.65	0.870065	0.246764	3.5259	0.000422054	0.00305755	Up	Scg2	291.473	11.5089	1.8914	6.08485	1.16598e-09	3.96278e-08	Up
Oplah	249.548	2.08102	0.636126	3.27139	0.0010702	0.00663137	Up	Pdcd4	1588.53	1.27655	0.231809	5.50691	3.65176e-08	6.29643e-07	Up	Scg3	422.188	12.0435	1.75334	6.86888	6.47079e-12	3.11786e-10	Up
Opn3	68.8183	7.79549	2.40929	3.2356	0.00121387	0.00737998	Up	Pdcd6ip	4289.02	0.320902	0.138655	2.31439	0.0206465	0.0790348	Up	Scgb3a1	57.7873	5.165	2.02064	2.55613	0.0105845	0.0594465	Up
Oprl1	51.4713	8.78538	2.51952	3.48692	0.00048861	0.00334899	Up	Pde10a	418.942	3.97319	0.517852	7.67243	1.68768e-14	5.58204e-13	Up	Scmh1	820.119	1.40815	0.432525	3.25566	0.00113129	0.00946953	Up
Ormdl3	668.801	1.72372	0.468106	3.68233	0.000231108	0.00172507	Up	Pde1b	95.0648	6.84719	1.68953	4.05273	5.06237e-05	0.000473021	Up	Scn1a	389.358	10.4931	2.03255	5.16252	2.43648e-07	5.58703e-06	Up
Osbp2	31.039	8.05584	2.61147	3.08479	0.00203697	0.0114316	Up	Pde1c	974.947	4.87688	1.55376	3.13876	0.00169666	0.0101378	Up	Scn2a1	288.77	5.83802	1.09846	5.31475	1.06806e-07	2.64857e-06	Up
Osbpl1a	870.923	1.59437	0.517985	3.07802	0.00208382	0.01166	Up	Pde2a	3917.83	2.28809	0.163206	14.0197	1.18147e-44	1.36625e-42	Up	Scn2b	246.038	3.65279	1.57361	2.32127	0.020272	0.0987718	Up
Osbpl6	121.091	8.54727	1.82181	4.69165	2.71013e-06	3.14181e-05	Up	Pde4dip	812.612	1.4693	0.363756	4.03924	5.36236e-05	0.000497425	Up	Scn3a	60.8348	9.24831	2.55587	3.61846	0.000296363	0.00304769	Up
Ovgp1	23.2358	7.63822	2.84669	2.68319	0.00729229	0.0336866	Up	Pde7b	466.436	4.18589	0.434747	9.62832	6.07116e-22	3.19776e-20	Up	Scn3b	124.803	6.87425	1.55802	4.41219	1.02332e-05	0.00015628	Up
Oxct1	1720.43	1.2499	0.575756	2.17088	0.02994	0.104856	Up	Pde8a	1557.07	1.37172	0.316325	4.33644	1.44807e-05	0.000154234	Up	Scoc	1703.9	1.04419	0.404202	2.58334	0.0097848	0.0558199	Up
P2rx5	37.9238	8.34537	2.3961	3.4829	0.000496017	0.00339363	Up	Pdhx	683.504	1.10213	0.373833	2.94818	0.00319654	0.017323	Up	Scrib	708.826	1.17102	0.464668	2.52013	0.0117313	0.0646707	Up
Pacsin1	72.68	7.7788	2.23988	3.47286	0.00051494	0.00350413	Up	Pdia3	9134.62	0.270859	0.126885	2.13468	0.0327869	0.113038	Up	Scrt1	134.317	10.3912	2.60724	3.98552	6.73333e-05	0.000828793	Up
Pafah1b1	5167.3	0.724492	0.242919	2.98244	0.00285957	0.0152581	Up	Pdk1	470.513	1.29753	0.394549	3.28865	0.00100671	0.00647831	Up	Scube2	61.5426	7.82845	2.30045	3.40302	0.000666464	0.00605478	Up
Pafah1b2	3723.61	0.619473	0.235617	2.62916	0.0085597	0.0385212	Up	Pdk3	241.112	1.72918	0.634368	2.72584	0.00641383	0.0308844	Up	Sdc3	3915.4	1.02454	0.227598	4.50153	6.74654e-06	0.00010678	Up
Pak1	157.885	3.22468	1.12992	2.85391	0.00431847	0.0217572	Up	Pdk4	296.317	2.02893	0.646961	3.13609	0.00171217	0.0102116	Up	Sdr39u1	461.542	1.24199	0.624179	1.9898	0.0466125	0.18358	Up
Pak3	110.769	8.40826	1.96048	4.28887	1.79586e-05	0.00017447	Up	Pdlim5	5039.04	0.617687	0.15895	3.88606	0.000101886	0.000882839	Up	Sec11c	1038.21	2.63404	0.389422	6.76397	1.34261e-11	6.1574e-10	Up
Pak7	45.9803	8.6226	2.5563	3.37308	0.000743329	0.00482711	Up	Pdxdc1	2119.41	0.606959	0.183349	3.3104	0.000931612	0.00605843	Up	Sec22c	336.331	1.92388	0.752316	2.55727	0.0105497	0.0592731	Up
Palm2	81.7554	9.45305	2.41825	3.90905	9.26595e-05	0.000768365	Up	Pdxk	2040.21	3.97907	0.301586	13.1938	9.52398e-40	9.45025e-38	Up	Sec61a1	5278.67	0.637951	0.252244	2.5291	0.0114355	0.0634073	Up
Palmd	2818.72	4.73183	0.399456	11.8457	2.26587e-32	1.82896e-30	Up	Pdzd2	3733.87	0.467379	0.218028	2.14367	0.0320597	0.111254	Up	Sec62	4781.92	0.565208	0.197646	2.8597	0.00424044	0.0286828	Up
Panx2	45.3175	8.6017	2.43333	3.53496	0.000407843	0.00284945	Up	Pea15a	6164.12	0.805524	0.132368	6.08548	1.16142e-09	2.46722e-08	Up	Secisbp2l	2587.49	0.709952	0.340649	2.08412	0.0371496	0.155461	Up
Papola	6193.1	0.715251	0.171576	4.16872	3.06317e-05	0.000283436	Up	Pear1	1069.42	0.662738	0.298023	2.22378	0.026163	0.0949025	Up	Sel1l	4283.73	0.664918	0.213705	3.11137	0.00186219	0.0144147	Up
Papss2	298.444	1.71419	0.660891	2.59376	0.0094932	0.0419998	Up	Penk	17.0071	7.33224	3.3899	2.16296	0.0305439	0.107106	Up	Sema3e	46.9234	7.39405	2.78967	2.65051	0.00803704	0.0479326	Up
Paqr5	65.69	4.09615	1.80551	2.26869	0.0232874	0.0864238	Up	Pex11a	15.2739	7.17707	3.34766	2.14391	0.0320405	0.111213	Up	Sema4g	295.368	3.3989	1.48323	2.29156	0.021931	0.105305	Up
Paqr7	497.465	1.556	0.739526	2.10405	0.0353737	0.119874	Up	Pex5l	21.524	7.67232	2.62054	2.92776	0.00341411	0.0182744	Up	Sema6a	13519.9	1.14555	0.188988	6.0615	1.3486e-09	4.53285e-08	Up
Paqr8	370.96	1.72592	0.595341	2.89904	0.0037431	0.0192482	Up	Pfkfb2	764.846	1.16321	0.42918	2.7103	0.00672215	0.032048	Up	Sema6d	13975.6	1.65875	0.23126	7.17267	7.35489e-13	4.02826e-11	Up
Paqr9	47.9748	4.55056	2.13328	2.13313	0.0329143	0.113157	Up	Pfkfb3	886.973	1.16363	0.333407	3.49013	0.000482788	0.00344241	Up	Sema7a	4540.84	2.4806	0.281768	8.80369	1.32388e-18	1.17195e-16	Up
Pard3	611.539	4.66706	0.453351	10.2946	7.45302e-25	4.59754e-23	Up	Pfkl	1987.76	0.914109	0.215929	4.23337	2.30216e-05	0.000233403	Up	Sepp1	40546.4	2.89584	0.11434	25.3266	1.6274e-141	1.90606e-138	Up
Pard6g	461.391	4.10481	0.505173	8.12556	4.45295e-16	1.67261e-14	Up	Pfkm	563.15	1.01774	0.444757	2.2883	0.02212	0.083343	Up	Sept3	608.333	12.5705	1.77725	7.073	1.51624e-12	7.98832e-11	Up
Parp6	509.299	1.26912	0.463659	2.73719	0.00619658	0.029367	Up	Pfkp	1898.47	1.88247	0.312785	6.01842	1.76124e-09	3.67543e-08	Up	Sept4	2841.29	2.0312	0.300752	6.75374	1.44079e-11	6.56809e-10	Up
Parvb	8164.12	1.88105	0.243472	7.72593	1.11039e-14	3.67909e-13	Up	Pfn2	733.704	2.20039	0.689572	3.19095	0.00141807	0.00870307	Up	Sept5	775.292	5.01682	1.12937	4.44215	8.90647e-06	0.000137396	Up
Pbx3	430.639	1.11569	0.507481	2.19849	0.0279144	0.0996241	Up	Pgam1	2176.79	0.811831	0.273722	2.9659	0.00301802	0.0165375	Up	Serinc1	7070.58	0.653713	0.262766	2.48781	0.0128532	0.0696205	Up
Pcca	893.014	1.79086	0.35728	5.01249	5.3731e-07	7.16492e-06	Up	Pgap3	40.2224	2.99894	1.29853	2.30949	0.0209162	0.0798441	Up	Serinc5	4477.21	1.59205	0.282052	5.64453	1.65633e-08	4.76736e-07	Up
Pcdh1	2962.04	4.75295	0.523734	9.07511	1.13559e-19	5.40207e-18	Up	Pgd	1611.85	0.489098	0.222945	2.19381	0.0282493	0.10097	Up	Serpinb6b	902.1	2.45131	0.640878	3.82493	0.000130808	0.0014797	Up
Pcdh11x	23.0821	7.6285	2.88343	2.64564	0.00815373	0.037068	Up	Pgk1	3328.98	0.504871	0.213442	2.36538	0.0180117	0.0709036	Up	Serpine1	697.118	2.07608	0.55928	3.71205	0.000205586	0.00219359	Up
Pcdh18	137.923	10.2077	1.7851	5.71829	1.07599e-08	1.89862e-07	Up	Pglyrp1	1539.82	8.69078	2.22197	3.9113	9.18004e-05	0.000804496	Up	Sesn1	2018.17	0.740291	0.296658	2.49543	0.0125804	0.0683614	Up
Pcdh19	2237.04	6.79578	1.90259	3.57186	0.000354458	0.00251834	Up	Pgrmc1	1972.38	0.478924	0.197372	2.4265	0.0152452	0.0619968	Up	Sesn3	1012.19	0.915013	0.365134	2.50597	0.0122118	0.0666917	Up
Pcdh9	264.661	11.148	1.81145	6.15417	7.54727e-10	1.56248e-08	Up	Phf21b	144.652	1.89557	0.69774	2.71672	0.00659314	0.0315797	Up	Sestd1	2857.33	1.52342	0.353522	4.30927	1.63794e-05	0.000236616	Up
Pcdha10	62.9126	9.07512	2.15266	4.21577	2.48931e-05	0.000234483	Up	Phgdh	252.622	2.32871	0.651127	3.57642	0.000348329	0.00260198	Up	Setbp1	325.687	2.84884	1.02624	2.77599	0.00550338	0.0351782	Up
Pcdha11	28.4353	7.92981	2.63366	3.01095	0.00260435	0.0141046	Up	Phtf2	406.566	0.981987	0.486243	2.01954	0.043431	0.139801	Up	Setd7	3296.63	0.7498	0.305482	2.45448	0.0141089	0.0747988	Up
Pcdha3	52.6692	8.81882	3.56331	2.4749	0.0133275	0.0554095	Up	Phyh	318.344	1.37646	0.595261	2.31236	0.0207578	0.0793771	Up	Sez6	58.6555	9.1959	2.37355	3.87433	0.000106918	0.00124081	Up
Pcdha4	35.2579	8.23973	3.8865	2.12009	0.0339983	0.116173	Up	Phyhipl	141.78	8.93668	1.69182	5.28227	1.2759e-07	2.01886e-06	Up	Sez6l	215.838	11.0755	1.97372	5.61147	2.00619e-08	5.65671e-07	Up
Pcdha6	30.4698	8.02913	4.02514	1.99475	0.0460705	0.146966	Up	Pi4ka	1859.74	0.763693	0.255547	2.98847	0.00280379	0.0155676	Up	Sgms1	2547.42	1.02068	0.324134	3.14895	0.00163858	0.012974	Up
Pcdhac1	64.2043	9.10456	3.4298	2.65455	0.00794152	0.0362444	Up	Pigc	478.614	0.843053	0.375293	2.24639	0.0246791	0.090788	Up	Sh2b1	933.07	1.20927	0.379234	3.18871	0.00142907	0.0115249	Up
Pcdhac2	251.811	23.775	4.7849	4.96875	6.7386e-07	8.80778e-06	Up	Pigf	298.142	2.27199	0.542063	4.19138	2.77261e-05	0.000277803	Up	Sh3bgrl2	356.867	3.16026	1.14857	2.75148	0.00593273	0.037389	Up
Pcdhb20	400.018	1.68848	0.501067	3.36976	0.00075233	0.00487889	Up	Pigg	303.389	1.20659	0.474773	2.5414	0.0110409	0.0478199	Up	Sh3bp4	1446.46	0.835818	0.323828	2.58106	0.00984982	0.0560857	Up
Pcdhb3	39.7122	6.88536	2.48793	2.76751	0.00564865	0.0272474	Up	Pigk	1835.28	0.592108	0.236304	2.50571	0.0122207	0.0519211	Up	Sh3gl2	328.133	4.72501	1.86586	2.53235	0.01133	0.0629602	Up
Pcdhgc3	7766.22	0.859155	0.262137	3.2775	0.00104731	0.00650818	Up	Pik3c2a	3556.33	0.447447	0.166938	2.68031	0.00735531	0.034387	Up	Sh3kbp1	1867.45	1.86478	0.292068	6.38474	1.7169e-10	6.79001e-09	Up
Pcgf1	36.8509	5.95763	2.02086	2.94807	0.00319768	0.016779	Up	Pik3cg	1165.45	2.98257	0.537137	5.55271	2.81271e-08	4.92145e-07	Up	Shank1	591.007	6.14835	1.44671	4.24987	2.13891e-05	0.000297688	Up
Pck2	564.534	0.952906	0.416077	2.29021	0.0220089	0.0829984	Up	Pik3r6	744.817	1.43114	0.345223	4.14555	3.39e-05	0.000330826	Up	Shank2	591.044	4.39735	1.3447	3.27012	0.00107501	0.00907319	Up
Pclo	335.843	6.71061	1.47281	4.55631	5.20589e-06	5.70153e-05	Up	Pink1	1581.7	1.22928	0.213156	5.76704	8.06751e-09	1.52994e-07	Up	Shc3	29.4496	8.20207	2.95277	2.77775	0.00547364	0.0350175	Up
Pcm1	3437.31	0.489963	0.233198	2.10106	0.0356354	0.120545	Up	Pip5k1b	275.485	5.07595	0.811578	6.25441	3.99017e-10	8.88115e-09	Up	Shh	78.9498	9.62438	2.41977	3.97739	6.96745e-05	0.000852785	Up
Pcnx	4631.59	0.406206	0.174688	2.32533	0.0200544	0.0770248	Up	Pisd	1046.89	1.22692	0.252887	4.85164	1.22442e-06	1.6621e-05	Up	Shisa6	891.602	10.7271	2.51377	4.26734	1.97813e-05	0.000277851	Up
Pcnxl2	47.2282	8.66149	3.64378	2.37706	0.0174511	0.0690176	Up	Pitpna	7990.99	0.637103	0.165511	3.8493	0.000118458	0.00101123	Up	Shisa9	82.3668	4.24859	1.44616	2.93783	0.00330514	0.0232766	Up
Pcp2	269.976	11.1767	1.96261	5.6948	1.23515e-08	2.15689e-07	Up	Pitrm1	1296.08	0.49655	0.24657	2.01383	0.0440271	0.141374	Up	Shroom1	487.267	5.42431	1.43943	3.76838	0.00016431	0.00181157	Up
Pcp4	952.588	11.4987	2.23135	5.15327	2.55982e-07	3.6406e-06	Up	Pja2	4970.68	0.679019	0.162463	4.17953	2.92117e-05	0.000291927	Up	Shroom2	2424.64	1.45937	0.273316	5.33949	9.32108e-08	2.34583e-06	Up
Pcsk2	132.686	10.1517	2.06149	4.92447	8.459e-07	1.08325e-05	Up	Pkia	487.317	2.08095	0.584745	3.55874	0.000372643	0.00275409	Up	Shroom4	2537.66	0.692118	0.272921	2.53597	0.0112138	0.0624282	Up
Pcsk6	199.134	3.53046	1.39667	2.52778	0.0114787	0.0492618	Up	Pkig	535.672	0.835655	0.382874	2.18258	0.0290664	0.103052	Up	Sidt1	37.6198	8.55517	2.72481	3.13972	0.00169107	0.0133273	Up
Pcx	1116.16	5.99096	0.37065	16.1634	9.13964e-59	1.54104e-56	Up	Pkm2	10084.9	0.958021	0.105853	9.0505	1.42314e-19	6.45662e-18	Up	Sidt2	1157.79	1.36865	0.356393	3.84028	0.000122896	0.00140166	Up
Pcyt1b	81.8484	3.23533	1.58044	2.04711	0.0406477	0.13357	Up	Pkp4	5651.83	0.826402	0.154862	5.33637	9.4828e-08	1.54008e-06	Up	Sigmar1	570.632	2.19147	0.52508	4.17359	2.99842e-05	0.000405092	Up
Pdcd10	1458.95	0.917393	0.369836	2.48054	0.0131183	0.0546747	Up	Pla2g12a	273.438	2.61412	0.59085	4.42434	9.67365e-06	0.000107114	Up	Sil1	641.462	1.65588	0.51499	3.21537	0.00130277	0.0106531	Up
Pdcd4	1612.65	0.74004	0.252824	2.9271	0.00342141	0.0177869	Up	Pla2g16	332.247	1.70163	0.678275	2.50875	0.0121158	0.0515892	Up	Sipa1l3	1383.68	1.1729	0.326213	3.5955	0.000323767	0.00328427	Up
Pde1b	85.2457	9.51333	2.24684	4.23409	2.29482e-05	0.000217786	Up	Pla2g2f	40.7085	8.59307	2.18028	3.94128	8.10491e-05	0.00071805	Up	Sirt6	83.3913	3.31186	1.64257	2.01628	0.0437712	0.175246	Up
Pde1c	958.504	3.01611	1.01036	2.98519	0.00283403	0.0151591	Up	Pla2g4e	52.7019	3.92439	1.2573	3.12128	0.00180067	0.0106394	Up	Skil	3831.66	0.764573	0.214741	3.56045	0.000370219	0.00369152	Up
Pde3a	175.293	2.38689	0.770108	3.09942	0.00193898	0.0109476	Up	Pla2g6	540.375	1.00009	0.438086	2.28286	0.0224388	0.0843994	Up	Skor2	35.8911	8.48711	4.21823	2.01201	0.0442192	0.176622	Up
Pde4b	4101.94	0.690509	0.299034	2.30913	0.0209362	0.0796259	Up	Plat	2578.94	0.387368	0.194557	1.99103	0.0464774	0.147386	Up	Slain1	29.8488	8.22117	2.99272	2.74706	0.00601324	0.0378107	Up
Pde4d	755.203	1.7245	0.573409	3.00745	0.00263451	0.0142527	Up	Plcb4	2505.43	1.09945	0.333831	3.29344	0.000989702	0.00638669	Up	Slc11a2	942.537	1.40377	0.408603	3.43553	0.000591401	0.0054873	Up
Pde4dip	730.748	1.46663	0.508332	2.88517	0.00391201	0.0199747	Up	Plcd4	28.2712	8.06597	2.36245	3.41424	0.000639594	0.00437198	Up	Slc13a4	42.8643	8.7432	2.7217	3.2124	0.0013163	0.0107521	Up
Pde5a	1522.75	1.70255	0.29038	5.86318	4.54081e-09	8.46522e-08	Up	Plcxd2	245.425	2.60415	1.24045	2.09935	0.0357857	0.120592	Up	Slc16a1	40990.6	7.34575	0.129533	56.7094	0	0	Up
Pde8a	1311.86	1.71744	0.377694	4.54717	5.43724e-06	5.91895e-05	Up	Pld3	484.719	1.22185	0.511854	2.38711	0.0169812	0.0677485	Up	Slc16a14	52.8639	9.04571	2.58109	3.50461	0.00045727	0.00440658	Up
Pde9a	103.662	9.7957	1.88517	5.1962	2.03403e-07	2.93966e-06	Up	Plekha7	94.036	1.86445	0.909082	2.05092	0.040275	0.132046	Up	Slc16a2	3711.18	2.49247	0.310002	8.04018	8.97078e-16	6.35298e-14	Up
Pdgfa	81.1526	9.44242	2.03387	4.64258	3.44092e-06	3.89725e-05	Up	Plekhg1	6838.25	0.420184	0.145482	2.88822	0.00387433	0.020254	Up	Slc16a4	1180.1	4.50334	0.718588	6.26693	3.68242e-10	1.37423e-08	Up
Pdgfb	1639.09	6.36352	0.333179	19.0994	2.55318e-81	6.91865e-79	Up	Plekhg5	3399.08	0.657643	0.208554	3.15334	0.00161415	0.00972408	Up	Slc16a6	829.414	2.05207	0.512665	4.00276	6.26089e-05	0.00077819	Up
Pdgfd	277.555	3.3519	1.64452	2.03823	0.0415268	0.135725	Up	Plekhh1	1293.09	1.28466	0.253803	5.06165	4.1564e-07	6.13487e-06	Up	Slc16a9	903.745	7.26253	0.753527	9.63805	5.52275e-22	5.85117e-20	Up
Pdgfrl	40.0264	8.42344	2.38154	3.53697	0.000404739	0.00283168	Up	Plekhh2	490.551	1.07131	0.431262	2.48413	0.012987	0.0545738	Up	Slc17a6	64.3728	9.33015	2.29354	4.06801	4.74165e-05	0.000606692	Up
Pdha1	2328.46	0.475011	0.214744	2.21198	0.0269677	0.0970547	Up	Plekhj1	191.736	1.38501	0.563463	2.45803	0.0139702	0.0577277	Up	Slc17a7	34.4497	8.42801	2.84884	2.9584	0.00309244	0.0220215	Up
Pdhx	625.968	1.01225	0.396437	2.55336	0.010669	0.0462973	Up	Plekhm1	773.045	0.837479	0.309984	2.70168	0.00689895	0.0326479	Up	Slc19a1	70.6658	4.73808	1.97537	2.39858	0.0164587	0.0842351	Up
Pdia6	6015.23	0.36091	0.178943	2.0169	0.0437057	0.141294	Up	Plod1	3572.9	1.70718	0.174423	9.78761	1.27274e-22	6.84434e-21	Up	Slc19a3	339.647	11.7298	1.62416	7.22211	5.11874e-13	2.83411e-11	Up
Pdk3	205.486	2.08068	0.668373	3.11305	0.00185167	0.010533	Up	Plp1	1582.89	6.47348	0.543393	11.9131	1.01192e-32	8.23458e-31	Up	Slc1a1	1029.07	4.30679	1.96573	2.19094	0.028456	0.128111	Up
Pdlim5	4074.27	1.02919	0.182747	5.63179	1.78347e-08	3.02393e-07	Up	Pls3	7970.32	1.2587	0.124861	10.0808	6.71451e-24	3.86776e-22	Up	Slc1a2	1543.01	5.73064	0.994295	5.76352	8.23794e-09	2.48871e-07	Up
Pdss2	84.0376	2.1555	1.08874	1.97981	0.0477247	0.150848	Up	Pltp	9832.48	2.06425	0.126428	16.3275	6.29133e-60	1.0633e-57	Up	Slc1a3	922.766	9.75438	1.09576	8.9019	5.48993e-19	5.06604e-17	Up
Pdxdc1	1890.26	0.627511	0.246242	2.54836	0.0108232	0.0468461	Up	Plxdc1	247.014	11.1935	3.22454	3.47134	0.000517871	0.00365864	Up	Slc1a4	6040.36	7.18212	0.246213	29.1704	4.60865e-187	1.00245e-183	Up
Pdxk	1829.14	3.98238	0.334611	11.9015	1.16171e-32	9.63331e-31	Up	Plxna2	2481.48	1.01511	0.18364	5.52768	3.2449e-08	5.64273e-07	Up	Slc1a6	1660.92	10.6347	2.6657	3.98946	6.6224e-05	0.00081712	Up
Pdxp	76.856	3.24367	1.46509	2.21398	0.0268302	0.0967326	Up	Pmaip1	1185.34	3.15106	0.335925	9.38024	6.58242e-21	3.25523e-19	Up	Slc22a23	906.159	2.41287	0.396925	6.07891	1.20999e-09	4.09408e-08	Up
Pdzd2	2603.22	1.55659	0.211717	7.35218	1.94995e-13	5.80205e-12	Up	Pmepa1	3762.2	2.8362	0.252686	11.2242	3.10261e-29	2.18891e-27	Up	Slc22a8	13083.7	7.26865	0.247331	29.3884	7.73665e-190	1.9633e-186	Up
Pdzrn3	48.1544	7.17659	2.31042	3.10619	0.00189517	0.0107431	Up	Pnkd	1099.67	2.10815	0.305652	6.89723	5.30245e-12	1.44339e-10	Up	Slc23a2	3278.91	0.487117	0.228793	2.12907	0.0332482	0.143817	Up
Peg3	723.559	1.24254	0.589223	2.10877	0.0349642	0.118751	Up	Pnma2	12.9625	6.942	3.07696	2.25612	0.0240629	0.0890918	Up	Slc24a2	380.744	6.78762	1.471	4.61431	3.9441e-06	6.70234e-05	Up
Pex5l	19.3961	7.37743	3.07372	2.40017	0.0163876	0.0654225	Up	Pnma3	16.0295	7.24671	3.11873	2.32361	0.0201465	0.0773086	Up	Slc25a1	777.63	1.0441	0.448868	2.32606	0.0200152	0.0977709	Up
Pfkm	442.756	1.70425	0.769647	2.21432	0.0268066	0.0966708	Up	Pnmal2	120.728	3.30421	1.31771	2.50754	0.0121574	0.0517094	Up	Slc25a16	352.576	1.39817	0.607273	2.30238	0.0213136	0.102859	Up
Pfkp	1494.2	3.12498	0.389017	8.033	9.51159e-16	3.46135e-14	Up	Pnpla6	2165.95	1.68263	0.29919	5.62395	1.86645e-08	3.34179e-07	Up	Slc25a23	527.364	2.54746	0.646903	3.93794	8.21848e-05	0.000986088	Up
Pfn2	580.575	3.88877	0.769799	5.05167	4.37971e-07	5.97144e-06	Up	Pnpla7	176.107	1.87303	0.625804	2.99299	0.00276255	0.015372	Up	Slc25a40	257.578	1.53625	0.738375	2.08058	0.0374724	0.156445	Up
Pgam1	1837.22	1.0761	0.392248	2.74342	0.00608028	0.0288971	Up	Pogk	834.049	0.581959	0.278397	2.09039	0.0365828	0.122767	Up	Slc25a46	1226.09	1.05604	0.371638	2.84158	0.00448907	0.0299915	Up
Pgap1	281.643	2.16566	0.607407	3.56541	0.000363285	0.00256889	Up	Polr1a	1204.63	0.767338	0.344039	2.23038	0.0257223	0.0937018	Up	Slc26a2	637.697	1.4208	0.59777	2.37683	0.017462	0.088097	Up
Pgap3	31.9656	8.09906	2.5665	3.15568	0.00160126	0.00932893	Up	Polr1d	1710.3	0.652054	0.317183	2.05576	0.0398053	0.131149	Up	Slc26a7	23.9322	7.90219	3.44025	2.29698	0.0216198	0.10404	Up
Pgcp	296.53	2.90028	0.730692	3.96922	7.21085e-05	0.000613367	Up	Pomp	2023.32	0.789279	0.242207	3.25869	0.00111927	0.00710163	Up	Slc27a4	419.349	1.2429	0.628645	1.9771	0.0480299	0.187514	Up
Pgf	32.4468	8.12045	2.52773	3.21255	0.00131563	0.00789117	Up	Pon2	4334.11	1.50472	0.190578	7.89559	2.88949e-15	1.00091e-13	Up	Slc29a2	20.5164	7.68121	3.55322	2.16176	0.0306369	0.135133	Up
Pglyrp1	1388.9	6.67519	1.53099	4.36004	1.30039e-05	0.000130652	Up	Pop5	357.945	1.42126	0.61902	2.29599	0.0216767	0.0820342	Up	Slc2a1	13080.7	5.54944	0.193814	28.6328	2.62252e-180	4.99132e-177	Up
Pgrmc1	1404.14	1.46356	0.270525	5.41009	6.29945e-08	9.86524e-07	Up	Por	1247.61	0.760608	0.24457	3.10998	0.00187099	0.0109999	Up	Slc2a3	238.27	3.01666	1.25364	2.40633	0.0161137	0.0828877	Up
Phactr3	60.74	9.02438	2.76428	3.26465	0.00109601	0.00677195	Up	Pou2af1	86.2866	9.67569	1.84614	5.24104	1.59672e-07	2.49315e-06	Up	Slc30a1	7042.49	2.5264	0.22038	11.4638	2.00483e-30	3.05255e-28	Up
Phc1	414.189	2.11951	0.591905	3.58082	0.000342519	0.00244254	Up	Pou3f3	51.0678	8.91916	1.99853	4.46287	8.08689e-06	9.1185e-05	Up	Slc30a10	65.719	9.35991	2.30883	4.05396	5.0358e-05	0.000640574	Up
Phf21b	127.348	2.01674	1.00337	2.00996	0.0444358	0.142879	Up	Ppapdc2	824.185	2.24878	0.306175	7.34473	2.06167e-13	6.29138e-12	Up	Slc31a1	5582.68	2.72632	0.391298	6.96737	3.22919e-12	1.61206e-10	Up
Phgdh	202.081	3.93893	0.840597	4.68587	2.78776e-06	3.21705e-05	Up	Ppard	1733.97	3.01659	0.25879	11.6565	2.1256e-31	1.68514e-29	Up	Slc32a1	296.449	11.5334	2.05403	5.615	1.96565e-08	5.57337e-07	Up
Phtf1	531.955	1.40009	0.417524	3.35332	0.000798479	0.0051256	Up	Ppargc1a	261.27	2.4958	0.940353	2.65411	0.00795187	0.0367156	Up	Slc35f2	3905.17	5.9476	1.88195	3.16034	0.00157583	0.0125506	Up
Phtf2	295.981	2.18135	0.889502	2.45233	0.0141935	0.0584811	Up	Ppargc1b	60.7171	3.46665	1.33146	2.60364	0.00922391	0.0414564	Up	Slc35f3	36.6388	8.51686	4.19561	2.02995	0.0423619	0.170861	Up
Phyhipl	131.117	5.15327	1.60531	3.21013	0.00132673	0.00794519	Up	Ppdpf	756.935	0.722561	0.304293	2.37456	0.0175701	0.0695567	Up	Slc36a1	514.256	2.08568	0.749305	2.78349	0.00537775	0.0345604	Up
Pi4k2a	446.658	1.0045	0.459314	2.18695	0.0287459	0.101655	Up	Ppef1	41.802	8.63076	2.0837	4.14204	3.44228e-05	0.000334827	Up	Slc38a2	21079.4	1.50101	0.226565	6.62507	3.4708e-11	1.49284e-09	Up
Pick1	208.688	2.17873	0.716378	3.04131	0.00235551	0.0129464	Up	Ppfia2	202.501	7.05394	1.36414	5.17099	2.32862e-07	3.54948e-06	Up	Slc38a3	8096.89	7.61452	0.925401	8.22835	1.89802e-16	1.40972e-14	Up
Pid1	53.9472	8.85318	2.55659	3.46289	0.000534414	0.00361235	Up	Ppfia3	66.7932	3.61661	1.29113	2.80112	0.00509263	0.0254797	Up	Slc38a5	6999.39	11.3368	0.526292	21.5409	6.44454e-103	4.90623e-100	Up
Pih1d2	15.3648	7.04167	3.28119	2.14608	0.031867	0.110316	Up	Ppfibp1	7304.26	0.8056	0.143463	5.61539	1.96122e-08	3.48711e-07	Up	Slc39a10	18893.8	3.36582	0.148234	22.7061	3.90077e-114	3.49371e-111	Up
Pik3cb	498.957	3.08632	0.586939	5.25833	1.45372e-07	2.15853e-06	Up	Ppm1b	2059.68	0.598635	0.192048	3.11712	0.00182626	0.0107823	Up	Slc39a11	312.254	1.89038	0.886824	2.13163	0.0330373	0.143068	Up
Pik3cg	1257.81	1.48594	0.300987	4.93688	7.93804e-07	1.02085e-05	Up	Ppm1h	811.48	2.28456	0.407521	5.606	2.07057e-08	3.6646e-07	Up	Slc39a12	41.6632	8.70212	2.85541	3.04759	0.00230683	0.017226	Up
Pik3ip1	253.048	3.35791	0.641945	5.23084	1.68744e-07	2.47172e-06	Up	Ppm1l	731.714	3.43599	0.403267	8.52037	1.59039e-17	6.32046e-16	Up	Slc39a8	10245.7	6.04602	1.08103	5.59282	2.23415e-08	6.24168e-07	Up
Pik3r3	1853.07	0.592426	0.231636	2.55757	0.0105407	0.0458324	Up	Ppp1r17	361.189	11.7416	3.45862	3.39489	0.000686571	0.00464787	Up	Slc3a2	19791.2	3.87322	0.14447	26.8098	2.4817e-158	3.77863e-155	Up
Pip5k1b	240.958	8.52973	1.25781	6.78142	1.19004e-11	2.99982e-10	Up	Ppp1r1a	35.5615	5.42626	2.28153	2.37834	0.0173908	0.0689889	Up	Slc40a1	7479.59	6.71498	1.52499	4.40329	1.06621e-05	0.000162503	Up
Pir	51.4952	7.29441	2.01753	3.61551	0.000299751	0.00217019	Up	Ppp1r1b	66.2685	4.07155	1.93177	2.10768	0.0350584	0.118723	Up	Slc41a1	1106.99	1.86291	0.576668	3.23047	0.00123587	0.0102157	Up
Pisd	1058.14	0.717977	0.309297	2.32132	0.0202697	0.0776553	Up	Ppp2r2b	88.6162	9.71404	1.9119	5.08083	3.7579e-07	5.57344e-06	Up	Slc41a2	74.2586	9.53604	2.32878	4.09486	4.22432e-05	0.000546006	Up
Pitpnm1	227.499	2.36518	1.15778	2.04285	0.0410668	0.134662	Up	Ppp2r2c	526.872	12.2864	2.50127	4.91205	9.01283e-07	1.2488e-05	Up	Slc43a2	4010.29	3.39622	0.204918	16.5736	1.0816e-61	4.33381e-59	Up
Pja2	4853.51	0.382054	0.188923	2.02227	0.0431481	0.139965	Up	Ppp3cc	264.666	1.21233	0.48783	2.48514	0.0129499	0.0544774	Up	Slc44a5	625.346	12.6107	1.60052	7.87913	3.29655e-15	2.19185e-13	Up
Pkm2	10915.8	0.271857	0.124553	2.18265	0.0290613	0.102395	Up	Ppp3r1	3518.33	0.57903	0.22202	2.608	0.00910719	0.0410758	Up	Slc46a3	757.906	4.82385	1.2232	3.94364	8.02537e-05	0.000965963	Up
Pkp3	23.8689	7.67764	2.82326	2.71942	0.00653967	0.0306768	Up	Ppp5c	1712.17	0.694149	0.214022	3.24336	0.00118128	0.00743376	Up	Slc4a10	631.931	12.6254	3.71847	3.39533	0.000685469	0.0062014	Up
Pkp4	3825.18	2.46472	0.390369	6.31381	2.72243e-10	5.9443e-09	Up	Pppde1	1403.28	0.976829	0.331361	2.94793	0.00319912	0.0173309	Up	Slc4a4	634.311	2.56779	0.816149	3.14623	0.00165392	0.013075	Up
Pla2g2f	36.7095	6.78657	2.25424	3.01058	0.00260752	0.0141167	Up	Ppt1	1284.6	0.60802	0.244189	2.48996	0.0127758	0.0538628	Up	Slc52a2	1010.08	3.76726	0.50168	7.50929	5.94467e-14	3.60611e-12	Up
Pla2g4e	44.7202	7.16438	2.10113	3.40977	0.000650167	0.00429903	Up	Prdm16	400.851	1.27937	0.447926	2.85621	0.00428735	0.0220607	Up	Slc52a3	223.724	2.22307	0.848753	2.61922	0.00881315	0.0513937	Up
Pla2g6	465.056	1.17858	0.489733	2.40657	0.0161031	0.0645955	Up	Prdm5	306.228	2.87445	0.570594	5.03765	4.71277e-07	6.87689e-06	Up	Slc5a6	1107.86	3.53442	0.584922	6.04255	1.51693e-09	5.05399e-08	Up
Plat	1444.11	3.28169	0.421959	7.77728	7.40994e-15	2.50995e-13	Up	Prepl	857.942	1.77365	0.518797	3.41877	0.000629046	0.00430946	Up	Slc6a1	541.145	10.9666	1.88084	5.83069	5.51976e-09	1.70474e-07	Up
Plce1	80.1806	5.80143	1.86291	3.11417	0.00184463	0.0105227	Up	Prex1	4385.14	0.433533	0.144755	2.99495	0.00274492	0.0152904	Up	Slc6a11	603.454	10.1404	1.50587	6.73393	1.65138e-11	7.43902e-10	Up
Plcl1	717.453	4.41698	0.48188	9.16613	4.90286e-20	2.39231e-18	Up	Prkacb	2950.11	0.370113	0.172672	2.14345	0.032077	0.111289	Up	Slc6a17	602.896	11.118	1.57682	7.05091	1.77752e-12	9.17444e-11	Up
Plcxd1	32.7505	3.11234	1.55041	2.00742	0.0447047	0.143424	Up	Prkag2	694.352	2.20608	0.40354	5.46683	4.58167e-08	7.77771e-07	Up	Slc6a20a	21.9827	7.77997	3.30386	2.35482	0.0185319	0.0924042	Up
Plekha1	2096.82	1.42529	0.230851	6.17408	6.65486e-10	1.38719e-08	Up	Prkar1b	257.162	2.53509	1.12632	2.25077	0.0244004	0.0900812	Up	Slc6a6	26758.4	1.25548	0.268579	4.67451	2.94662e-06	5.15692e-05	Up
Plekha5	226.722	1.61684	0.766627	2.10904	0.0349415	0.118722	Up	Prkar2b	298.868	2.52254	0.790483	3.19113	0.00141716	0.00870094	Up	Slc6a7	95.3256	9.8964	2.66565	3.71256	0.000205174	0.00219189	Up
Plekhg5	2613.78	1.31636	0.306011	4.30167	1.69515e-05	0.000165427	Up	Prkcb	1580.53	3.4578	0.347944	9.9378	2.85067e-23	1.58279e-21	Up	Slc7a1	41314	5.38708	0.631221	8.53438	1.40904e-17	1.14117e-15	Up
Plekhh1	830.816	6.47523	0.996686	6.49676	8.20672e-11	1.88692e-09	Up	Prkcc	548.173	2.80878	1.07432	2.61448	0.00893639	0.0403884	Up	Slc7a11	187.645	3.70069	1.28933	2.87025	0.00410148	0.0278791	Up
Plekhh2	303.696	5.78084	0.682619	8.46862	2.48327e-17	1.0268e-15	Up	Prmt8	445.954	12.0458	3.32468	3.62314	0.000291045	0.00221927	Up	Slc7a2	42.9546	8.74619	3.17246	2.75691	0.00583499	0.0368952	Up
Plekhm1	707.804	0.753724	0.363639	2.07272	0.0381981	0.127062	Up	Prnd	6813.52	2.85227	0.191548	14.8906	3.79125e-50	5.07039e-48	Up	Slc7a3	501.652	10.8525	1.55099	6.99717	2.6119e-12	1.31685e-10	Up
Pllp	179.882	3.26395	1.22628	2.66167	0.00777536	0.0355609	Up	Prnp	5329.57	3.33165	0.157046	21.2145	7.02242e-100	2.70012e-97	Up	Slc7a5	34515.3	7.51266	1.01071	7.43308	1.06095e-13	6.31015e-12	Up
Plod2	242.705	2.37801	0.888124	2.67757	0.00741585	0.0341327	Up	Prom1	3676.43	3.15731	0.217161	14.5391	6.85263e-48	8.7102e-46	Up	Slc7a7	711.29	1.06935	0.476215	2.24551	0.0247353	0.11599	Up
Plp2	481.665	3.30956	0.720928	4.5907	4.41765e-06	4.91842e-05	Up	Pros1	2745.98	0.824962	0.166888	4.94321	7.68465e-07	1.08332e-05	Up	Slc7a8	3597.75	5.17208	0.513094	10.0802	6.75934e-24	7.85632e-22	Up
Pls3	6684.65	1.61655	0.28688	5.63495	1.75113e-08	2.97574e-07	Up	Prosc	503.351	0.757185	0.358517	2.11199	0.0346871	0.117716	Up	Slc8a3	31.4394	8.29587	3.14678	2.6363	0.00838155	0.0495987	Up
Pltp	7130.99	9.15216	0.284345	32.1868	2.70283e-227	2.92968e-224	Up	Prps1	844.06	0.678268	0.339995	1.99494	0.0460499	0.146453	Up	Slc9a4	29.9078	8.22463	2.95907	2.77947	0.00544481	0.0348917	Up
Plxdc2	145.691	4.33407	1.79101	2.4199	0.0155246	0.0626557	Up	Prr13	362.935	0.85262	0.419312	2.03338	0.0420143	0.136296	Up	Slc9a7	65.7947	9.3614	2.49546	3.75137	0.000175868	0.00192369	Up
Plxnb1	688.314	3.15232	0.471313	6.68838	2.25654e-11	5.51561e-10	Up	Prr24	408.734	1.05496	0.420498	2.50884	0.0121127	0.0515892	Up	Slco1a4	4030.5	11.1031	1.69648	6.54478	5.95843e-11	2.47877e-09	Up
Pmaip1	960.305	7.4301	0.833095	8.91867	4.71916e-19	2.1767e-17	Up	Prr5	279.661	2.84409	0.686362	4.14372	3.41714e-05	0.000333052	Up	Slco1b2	16.7285	7.38636	3.65292	2.02204	0.0431718	0.173348	Up
Pmepa1	3121.22	4.15508	0.25997	15.9829	1.6814e-57	2.80388e-55	Up	Prr5l	730.463	1.93401	0.349885	5.52757	3.24696e-08	5.64273e-07	Up	Slco1c1	57587	11.3983	1.79832	6.33833	2.32271e-10	8.97602e-09	Up
Pmp22	513.553	1.51246	0.446755	3.38544	0.000710634	0.00463424	Up	Prrt1	13.6434	7.01421	3.55787	1.97146	0.048671	0.152425	Up	Slco2b1	4654.42	5.8151	0.297018	19.5783	2.36897e-85	1.56826e-82	Up
Pnck	16.2273	7.11988	3.35089	2.12478	0.0336052	0.115011	Up	Prune2	54.4421	4.60134	1.82972	2.51478	0.0119105	0.0508543	Up	Slco5a1	228.467	9.71967	1.74496	5.57016	2.5451e-08	7.05858e-07	Up
Pnkd	971.783	2.22179	0.335911	6.6142	3.73564e-11	8.95551e-10	Up	Psap	11673.2	0.790581	0.147092	5.37473	7.66982e-08	1.26433e-06	Up	Slitrk1	152.97	10.5787	2.11959	4.99092	6.00923e-07	1.25166e-05	Up
Pnpla6	1844.73	2.01258	0.304991	6.5988	4.14486e-11	9.85516e-10	Up	Psat1	1192.42	1.02533	0.256964	3.99018	6.6024e-05	0.000598027	Up	Slitrk2	20.4373	7.67501	3.37566	2.27363	0.0229884	0.109587	Up
Pnpla8	1243.77	0.785382	0.281643	2.78857	0.00529409	0.0257741	Up	Psd2	654.849	12.6	4.17282	3.01953	0.00253165	0.014273	Up	Slitrk3	26.8627	8.06925	3.06827	2.6299	0.00854094	0.050249	Up
Pnpt1	605.763	0.971747	0.444452	2.18639	0.0287869	0.101722	Up	Psma8	60.0175	7.7171	1.83314	4.20977	2.55629e-05	0.000256798	Up	Slitrk4	32.3468	8.33697	3.54283	2.3532	0.0186127	0.0926436	Up
Poc5	271.891	1.48669	0.722827	2.05677	0.0397081	0.131079	Up	Psmb5	1738.76	0.833947	0.206399	4.04045	5.33489e-05	0.000495475	Up	Slitrk5	149.691	10.5475	2.46785	4.27397	1.92019e-05	0.000270962	Up
Podxl	17504.5	1.09029	0.112307	9.70818	2.7825e-22	1.52987e-20	Up	Psmd10	541.485	1.05082	0.4982	2.10923	0.0349247	0.118365	Up	Smap1	2578.01	0.764275	0.328351	2.32762	0.0199324	0.0975227	Up
Podxl2	470.01	3.41302	0.833188	4.09634	4.19729e-05	0.000375775	Up	Psmd8	1297.2	0.626968	0.272555	2.30034	0.0214292	0.0813176	Up	Smarca2	7926.85	0.655543	0.240495	2.72581	0.00641434	0.0397982	Up
Polr1e	145.63	2.02838	0.791927	2.56132	0.0104275	0.0454574	Up	Psme3	2343.1	0.636266	0.283076	2.24768	0.0245965	0.0905661	Up	Smarca4	8055.73	0.379184	0.181243	2.09213	0.036427	0.153427	Up
Polr2a	9949.18	0.468653	0.159086	2.94592	0.00321997	0.0168726	Up	Psors1c2	38.4765	8.51173	2.21417	3.84421	0.000120944	0.00102939	Up	Smarca5-ps	47.7887	6.48384	2.10749	3.07657	0.00209396	0.015862	Up
Polr2b	2230.22	0.686902	0.216677	3.17017	0.0015235	0.00894701	Up	Ptar1	295.777	2.43738	0.551933	4.41608	1.00506e-05	0.000110729	Up	Smcr7l	878.275	1.31656	0.438164	3.00473	0.00265819	0.0193707	Up
Polr2m	5314.5	0.381111	0.179197	2.12677	0.0334388	0.114519	Up	Ptchd1	118.301	8.662	2.00266	4.32525	1.52357e-05	0.000161715	Up	Smoc1	17.3918	5.9938	3.03012	1.97808	0.04792	0.187229	Up
Pon2	4072.91	1.25655	0.21952	5.72409	1.03992e-08	1.84354e-07	Up	Ptdss1	2034.06	0.450717	0.189956	2.37274	0.0176567	0.0697919	Up	Smoc2	142.997	9.04353	1.79266	5.04474	4.54135e-07	9.64388e-06	Up
Pop5	278.711	2.34362	0.729832	3.21118	0.00132192	0.00792263	Up	Pten	5549.86	0.302086	0.136772	2.20869	0.0271965	0.0979814	Up	Smox	1479.15	3.07139	0.563966	5.44604	5.15022e-08	1.35436e-06	Up
Por	1106.66	0.803696	0.330333	2.43299	0.0149749	0.0609232	Up	Ptgds	173.645	10.685	3.31558	3.22266	0.00127004	0.00792101	Up	Smpdl3a	809.248	1.92348	0.426927	4.50541	6.62451e-06	0.000105177	Up
Pou2f1	768.895	1.28047	0.453962	2.82066	0.00479251	0.0237159	Up	Ptges	783.286	5.12602	0.428215	11.9707	5.06071e-33	4.18461e-31	Up	Snap25	621.548	9.58366	1.47055	6.51704	7.17076e-11	2.95886e-09	Up
Pou3f3	46.2697	7.13382	2.08453	3.42228	0.000620994	0.00412772	Up	Ptges3	4243.89	0.358085	0.167827	2.13365	0.0328712	0.113253	Up	Snca	83.8585	8.25187	1.98008	4.16744	3.08044e-05	0.000415069	Up
Ppa1	745.376	1.96114	0.372773	5.26094	1.43323e-07	2.13228e-06	Up	Ptgis	236.528	1.8115	0.55953	3.23754	0.00120567	0.00755937	Up	Sncb	98.6504	9.94585	2.59931	3.82634	0.000130064	0.00147347	Up
Ppapdc2	675.345	3.23607	0.388391	8.33199	7.94975e-17	3.14734e-15	Up	Ptn	1312.43	3.43323	0.403161	8.51577	1.65483e-17	6.5596e-16	Up	Snhg11	550.447	3.15654	0.799083	3.9502	7.80854e-05	0.000941352	Up
Ppard	1702.9	2.10653	0.338235	6.22802	4.72377e-10	1.00116e-08	Up	Ptp4a1	820.67	0.791895	0.346575	2.28492	0.0223178	0.084047	Up	Snn	3118.21	1.54755	0.455932	3.39427	0.000688131	0.00621624	Up
Ppargc1a	215.494	3.74949	1.78223	2.10382	0.0353942	0.119917	Up	Ptp4a2	10987.2	0.22082	0.111828	1.97464	0.0483096	0.151527	Up	Snord17	17.6157	7.46091	3.58056	2.08372	0.0371852	0.155461	Up
Ppdpf	643.711	0.936446	0.428683	2.18447	0.0289274	0.102087	Up	Ptp4a3	2564.47	1.07419	0.198806	5.40323	6.54509e-08	1.08708e-06	Up	Snrpn	991.697	2.53023	0.818384	3.09174	0.0019899	0.0152713	Up
Ppef1	37.4705	8.328	2.40438	3.46368	0.000532845	0.00360496	Up	Ptpla	219.015	1.58046	0.572223	2.76197	0.00574531	0.0282039	Up	Snx13	2284.91	0.59713	0.263467	2.26643	0.0234249	0.111319	Up
Ppfia3	55.7184	8.89982	2.29803	3.8728	0.000107591	0.00088016	Up	Ptplad1	2094.39	1.32508	0.326679	4.05622	4.98743e-05	0.000467154	Up	Snx3	6706.37	0.671832	0.192571	3.48874	0.000485298	0.00462689	Up
Ppfibp1	7274.94	0.421232	0.180181	2.33783	0.019396	0.0750469	Up	Ptpn11	5768.2	1.16056	0.134393	8.63554	5.84514e-18	2.39091e-16	Up	Sobp	886.202	11.6727	1.49696	7.79756	6.31175e-15	4.16029e-13	Up
Pphln1	1079.03	0.903859	0.362399	2.4941	0.0126278	0.0531706	Up	Ptpra	3176.16	0.717214	0.172614	4.15502	3.25256e-05	0.000319848	Up	Socs2	701.506	1.09854	0.516789	2.12569	0.0335287	0.144655	Up
Ppia	16646.4	0.398316	0.16402	2.42845	0.0151634	0.0614925	Up	Ptprd	2965.54	1.419	0.271795	5.22083	1.78127e-07	2.74784e-06	Up	Sorbs1	3413.61	1.53093	0.282961	5.41039	6.28893e-08	1.62022e-06	Up
Ppm1b	1622.31	1.12732	0.302631	3.72505	0.000195275	0.00149134	Up	Ptpre	403.867	2.16217	0.79063	2.73474	0.0062429	0.0302507	Up	Sorbs2	3376.08	1.76774	0.30815	5.73663	9.65811e-09	2.88342e-07	Up
Ppm1f	3813.05	0.863548	0.18644	4.63178	3.62527e-06	4.08718e-05	Up	Ptprg	19783.1	1.19849	0.133692	8.9646	3.11417e-19	1.38029e-17	Up	Sort1	2391.53	1.39205	0.43565	3.19535	0.00139661	0.0113108	Up
Ppm1h	650.558	3.64395	0.572708	6.36266	1.98289e-10	4.38635e-09	Up	Ptprn	134.082	5.13581	1.76865	2.90381	0.00368656	0.0194309	Up	Sox10	19.5604	7.61123	3.55247	2.14252	0.0321517	0.140109	Up
Ppm1l	609.466	6.37182	2.50421	2.54444	0.0109453	0.0472265	Up	Ptpro	59.505	9.13937	2.10314	4.34558	1.38907e-05	0.000148566	Up	Sox2	57.9828	9.1792	2.40529	3.81625	0.000135495	0.00152479	Up
Ppp1ca	3327.09	0.42613	0.197839	2.15392	0.0312467	0.108431	Up	Ptprr	360.118	4.57442	0.977561	4.67942	2.87683e-06	3.61484e-05	Up	Sox21	30.6715	8.26027	3.04013	2.71708	0.00658608	0.0405991	Up
Ppp1r13b	2055.62	2.16848	0.260285	8.33115	8.00596e-17	3.1556e-15	Up	Ptprt	59.497	6.68276	1.64878	4.05315	5.05323e-05	0.000472454	Up	Sox9	516.361	2.1756	0.716705	3.03556	0.00240088	0.017806	Up
Ppp1r14c	68.8928	9.20613	2.10359	4.37639	1.2066e-05	0.000122068	Up	Ptprz1	1415.57	6.47456	1.76325	3.67194	0.000240713	0.00187452	Up	Sparc	91639	0.349579	0.108427	3.2241	0.0012637	0.0103949	Up
Ppp1r17	327.652	8.91295	1.69806	5.24889	1.53019e-07	2.26101e-06	Up	Pttg1ip	3925.84	1.02368	0.149432	6.85045	7.36205e-12	1.97262e-10	Up	Sparcl1	45284.5	1.84689	0.19006	9.71736	2.5428e-22	2.74586e-20	Up
Ppp1r1b	56.5948	8.9223	2.4693	3.61329	0.000302338	0.00218684	Up	Pus3	250.459	1.62142	0.512375	3.16452	0.00155337	0.00940721	Up	Specc1l	4618.3	0.882246	0.193362	4.56266	5.05107e-06	8.32334e-05	Up
Ppp1r2	4818.11	0.472777	0.234725	2.01418	0.0439909	0.141995	Up	Pvalb	252.709	9.76025	1.97863	4.93283	8.10469e-07	1.13628e-05	Up	Sphkap	370.925	2.46671	1.23682	1.9944	0.0461081	0.18198	Up
Ppp1r8	590.194	1.04173	0.480316	2.16884	0.030095	0.105235	Up	Pvrl2	1172.34	1.28081	0.28322	4.52232	6.11656e-06	7.05722e-05	Up	Spna1	33.7023	6.91916	2.48255	2.78712	0.00531785	0.0342656	Up
Ppp2ca	4020.07	0.527769	0.215371	2.45051	0.0142654	0.0586818	Up	Pxk	1896.27	0.915786	0.223753	4.09284	4.26114e-05	0.000404545	Up	Spna2	49405.4	1.04617	0.118665	8.8162	1.18413e-18	1.06056e-16	Up
Ppp2cb	1743.85	0.77187	0.24794	3.11313	0.00185113	0.010533	Up	Pygb	2526.77	0.70711	0.225567	3.13481	0.00171963	0.0102421	Up	Spnb1	286.499	4.22566	1.72751	2.4461	0.0144411	0.0761097	Up
Ppp2r2c	475.829	11.9943	1.73045	6.93132	4.16922e-12	1.09271e-10	Up	Qars	2602.08	0.449285	0.186836	2.4047	0.0161858	0.0651842	Up	Spnb2	108575	0.34066	0.130459	2.61124	0.00902135	0.0524271	Up
Ppp3cb	1255.62	0.662749	0.32859	2.01695	0.0437009	0.141294	Up	Qk	29344.5	1.07894	0.122279	8.82361	1.10829e-18	4.70869e-17	Up	Spnb3	4203.75	7.39996	1.79767	4.11642	3.84807e-05	0.000501204	Up
Pppde2	661.678	1.17172	0.494518	2.36941	0.0178167	0.0702072	Up	Qpctl	231.62	1.2037	0.607666	1.98085	0.0476081	0.150105	Up	Spns2	768.69	1.95589	0.590687	3.31122	0.000928916	0.00803618	Up
Ppt2	793.6	1.58095	0.675483	2.34047	0.0192594	0.0746707	Up	Rab1	5620.23	0.377118	0.145074	2.59948	0.00933655	0.0418404	Up	Spock1	177.87	10.7963	2.23907	4.8218	1.42271e-06	2.70439e-05	Up
Prcp	4941.95	0.586008	0.161103	3.63747	0.000275325	0.00201644	Up	Rab10	5690.79	0.432126	0.152022	2.84252	0.00447589	0.0228702	Up	Spock2	36471.6	8.63375	0.168804	51.1467	0	0	Up
Prdm1	926.797	2.69138	0.397408	6.77232	1.26733e-11	3.18406e-10	Up	Rab11fip1	1559.81	3.70523	0.381794	9.70479	2.87675e-22	1.53095e-20	Up	Spock3	492.58	12.266	3.98199	3.08037	0.00206746	0.0157322	Up
Prdm16	255.634	8.61738	1.24631	6.91431	4.70144e-12	1.22375e-10	Up	Rab11fip4	123.517	5.44153	1.92418	2.82798	0.00468425	0.0237533	Up	Sprn	74.6384	9.5434	2.75795	3.46032	0.000539531	0.00506925	Up
Prdm5	261.352	3.57068	0.754616	4.73179	2.22552e-06	2.63024e-05	Up	Rab11fip5	753.62	0.816105	0.317763	2.56828	0.0102204	0.0450657	Up	Spsb1	507.34	2.46625	0.611885	4.03058	5.56387e-05	0.000699549	Up
Prdx2	2940.82	0.586618	0.243838	2.40577	0.0161384	0.0646518	Up	Rab12	3096.84	1.12527	0.231561	4.85952	1.17673e-06	1.60729e-05	Up	Spsb3	273.83	1.44996	0.701335	2.06743	0.0386936	0.159834	Up
Prdx3	398.821	1.06336	0.516893	2.05721	0.039666	0.130997	Up	Rab15	111.906	2.61752	1.12549	2.32567	0.0200362	0.0769621	Up	Src	868.211	3.25261	0.731637	4.44566	8.76208e-06	0.000135443	Up
Prdx6	1116.71	0.77546	0.346971	2.23494	0.0254211	0.0924875	Up	Rab18	3030.17	0.653513	0.190764	3.42577	0.000613066	0.00422066	Up	Srgap1	4492.57	0.862116	0.294533	2.92706	0.00342182	0.0239103	Up
Prep	1324.82	2.19764	0.328577	6.68834	2.25713e-11	5.51561e-10	Up	Rab24	473.988	0.821021	0.375999	2.18357	0.0289937	0.102961	Up	Srgap2	7243.78	0.64063	0.166089	3.85715	0.000114714	0.00131822	Up
Prepl	672.695	2.99832	0.955923	3.13657	0.00170936	0.00986296	Up	Rab2a	4337.08	0.641597	0.140644	4.56185	5.07049e-06	5.96665e-05	Up	Srgap3	421.431	2.56324	0.911903	2.81087	0.00494081	0.0323009	Up
Prickle3	183.203	1.69645	0.748486	2.2665	0.0234206	0.0867693	Up	Rab34	160.704	1.54551	0.612515	2.52322	0.0116286	0.0499018	Up	Sri	2827.48	0.652087	0.239275	2.72527	0.00642498	0.0398446	Up
Prkaa2	54.849	6.28551	2.10174	2.99062	0.00278416	0.0149187	Up	Rab3a	392.202	2.07669	0.8733	2.37798	0.0174078	0.069003	Up	Srms	28.7866	8.16927	2.97649	2.7446	0.00605841	0.0380246	Up
Prkag2	618.115	2.28429	0.534963	4.26999	1.95477e-05	0.000188102	Up	Rab3c	414.838	2.54075	0.845833	3.00385	0.00266589	0.0149259	Up	Srp14	1637.14	0.750469	0.375097	2.00073	0.0454211	0.180146	Up
Prkar1b	198.81	9.25507	1.95025	4.74557	2.0792e-06	2.46692e-05	Up	Rab3gap2	1891.49	0.585398	0.275759	2.12286	0.0337653	0.115556	Up	Srp54b	3969.18	0.676364	0.335656	2.01505	0.0438994	0.175621	Up
Prkar2a	1171.52	0.792671	0.295648	2.68113	0.00733736	0.0338536	Up	Rab5b	3899.68	1.05438	0.16635	6.33829	2.32325e-10	5.34104e-09	Up	Srp72	3558.33	0.655503	0.293302	2.23491	0.0254235	0.118162	Up
Prkca	229.683	2.60021	1.19177	2.1818	0.029124	0.10259	Up	Rab6a	4980.37	0.736809	0.136259	5.40743	6.3934e-08	1.06534e-06	Up	Srpr	3034.65	1.18929	0.265682	4.47636	7.59251e-06	0.000118812	Up
Prkcb	1909.26	1.08694	0.261587	4.15519	3.25016e-05	0.000299279	Up	Rab6b	419.855	2.50589	0.710985	3.52453	0.00042423	0.00307187	Up	Srrm3	25.6471	8.00204	3.47312	2.30399	0.0212231	0.10252	Up
Prkcd	161.7	6.46911	1.12598	5.74533	9.17416e-09	1.63593e-07	Up	Rab9	877.098	0.761672	0.325977	2.33658	0.0194609	0.0752032	Up	Ssh2	3955.03	1.13903	0.222666	5.11542	3.13037e-07	6.99899e-06	Up
Prkcdbp	219.483	2.37837	1.11329	2.13634	0.032652	0.112434	Up	Rabep1	2354.77	0.505711	0.200261	2.52526	0.0115613	0.0496682	Up	Ssx2ip	1937.82	4.0486	0.30459	13.292	2.57719e-40	5.23203e-38	Up
Prmt1	1086.79	0.717219	0.312216	2.29719	0.0216078	0.0816888	Up	Rabgap1l	1344.16	0.584583	0.247487	2.36207	0.018173	0.0713854	Up	St18	48.0623	8.90882	2.49397	3.57215	0.000354065	0.00355138	Up
Prmt5	702.368	0.96305	0.372569	2.58489	0.00974087	0.0428457	Up	Rad23b	4903.49	0.466232	0.132164	3.52768	0.000419212	0.00303983	Up	St3gal5	979.075	1.55015	0.635358	2.43981	0.014695	0.0771803	Up
Prmt8	403.562	11.7568	3.33811	3.52199	0.000428318	0.00297743	Up	Rai14	4684.4	0.45926	0.222763	2.06165	0.0392409	0.129623	Up	St3gal6	2944.66	2.45454	0.230173	10.6639	1.50161e-26	1.97099e-24	Up
Prnd	5416.85	6.57706	0.244666	26.8818	3.58916e-159	2.47571e-156	Up	Rala	2692.1	0.544247	0.229236	2.37418	0.0175882	0.0695995	Up	St6galnac2	685.445	4.43107	0.761311	5.82031	5.87377e-09	1.80311e-07	Up
Prnp	4386.98	6.72414	1.7262	3.89534	9.8061e-05	0.000809617	Up	Ralgapa1	3045.83	0.555553	0.190234	2.92037	0.00349613	0.0186509	Up	St8sia1	550.387	2.02374	0.496744	4.07401	4.6211e-05	0.000592264	Up
Procr	578.722	1.46302	0.490769	2.98107	0.0028724	0.0153158	Up	Ralgps2	797.077	1.75514	0.312244	5.62105	1.89802e-08	3.39043e-07	Up	St8sia3	145.62	6.48158	1.83628	3.52973	0.000415978	0.00407573	Up
Prom1	3006.43	6.14075	0.42521	14.4417	2.82881e-47	3.60733e-45	Up	Ralyl	31.4591	8.21967	2.51287	3.27102	0.00107159	0.00683576	Up	St8sia4	3190.04	2.99683	0.225305	13.3012	2.27713e-40	4.68534e-38	Up
Prpf19	2507.93	0.87629	0.216433	4.04879	5.14827e-05	0.000453424	Up	Rap1gap2	73.0283	4.24513	1.52232	2.7886	0.00529362	0.0262819	Up	St8sia5	82.0455	9.67988	2.46544	3.92622	8.62896e-05	0.00102644	Up
Prps1	529.367	2.88077	0.518734	5.55347	2.80051e-08	4.63444e-07	Up	Rap1gds1	3245.3	0.35368	0.167447	2.11219	0.0346698	0.117706	Up	Stac	44.5139	8.79783	2.6041	3.37846	0.000728936	0.00652486	Up
Prr18	421.828	5.077	2.56142	1.9821	0.0474676	0.150443	Up	Rapgef4	1382.37	3.11153	0.313849	9.91409	3.61532e-23	1.98584e-21	Up	Stac2	52.1408	7.58809	2.27342	3.33775	0.000844601	0.00739925	Up
Prr5	255.285	2.61111	0.829436	3.14806	0.00164361	0.00954159	Up	Rapgef6	3126.99	0.912836	0.175328	5.20645	1.92484e-07	2.9604e-06	Up	Stat4	28.3425	6.70605	2.66134	2.51981	0.011742	0.0646847	Up
Prrc1	813.293	0.954162	0.354092	2.69468	0.00704569	0.0326568	Up	Rasa4	40.818	3.25166	1.3965	2.32843	0.0198894	0.0765322	Up	Steap3	511.731	6.21232	1.30891	4.74617	2.07309e-06	3.78048e-05	Up
Prrt4	22.8784	7.6156	2.93284	2.59666	0.00941347	0.0417678	Up	Rasgrp1	44.3664	2.6832	1.24485	2.15543	0.0311279	0.108732	Up	Steap4	18.9522	7.56569	3.57021	2.11912	0.0340805	0.146585	Up
Prtg	20.2189	7.43842	3.04491	2.4429	0.0145697	0.0595944	Up	Rasgrp4	555.562	3.11317	0.556162	5.59761	2.17333e-08	3.84205e-07	Up	Stk25	2271.41	0.981759	0.324545	3.02503	0.00248605	0.0183365	Up
Prune	259.294	1.38655	0.612546	2.26358	0.0236	0.0873914	Up	Rasl10b	44.1051	8.7074	2.77462	3.13823	0.00169973	0.0101522	Up	Stk30	30.532	8.25367	3.05697	2.69995	0.00693494	0.0423552	Up
Psat1	759.78	4.05189	0.656571	6.17129	6.77359e-10	1.41e-08	Up	Rassf2	2277.08	0.973325	0.22841	4.26131	2.03233e-05	0.00020852	Up	Stmn2	1186.74	2.28107	0.72698	3.13773	0.00170263	0.0134114	Up
Psd2	593.739	9.86377	2.44929	4.0272	5.64458e-05	0.000490587	Up	Rassf3	3830.49	0.837682	0.178908	4.6822	2.83819e-06	3.57798e-05	Up	Stmn3	399.389	11.9634	1.85228	6.45874	1.05578e-10	4.26402e-09	Up
Psip1	1796.41	0.708816	0.296641	2.38948	0.0168724	0.0670609	Up	Rassf6	12.9078	6.93464	3.0906	2.24378	0.0248462	0.0912453	Up	Stmn4	91.5462	8.4021	2.13712	3.9315	8.4418e-05	0.00100891	Up
Psma6	1903.79	0.666291	0.339759	1.96107	0.0498706	0.156071	Up	Rassf8	1771.82	0.985378	0.255301	3.85968	0.000113536	0.000973351	Up	Stox1	56.5944	5.31323	1.65615	3.20818	0.00133579	0.010888	Up
Psmb7	2814.49	0.589493	0.214411	2.74936	0.00597125	0.0284234	Up	Rassf9	3492.52	2.28156	0.214054	10.6588	1.58608e-26	1.01642e-24	Up	Stra13	98.1461	3.4025	1.58693	2.14408	0.0320263	0.139883	Up
Psmc2	1989.94	0.542353	0.224962	2.41087	0.0159147	0.0639242	Up	Rbbp9	564.192	0.84962	0.385117	2.20614	0.0273744	0.098514	Up	Stra6	1849.48	11.1547	0.920697	12.1155	8.74162e-34	1.54767e-31	Up
Psmd1	4559.35	0.597024	0.205119	2.91062	0.00360713	0.0186374	Up	Rbfox1	128.825	3.55553	1.00741	3.52938	0.000416534	0.00302469	Up	Strn3	3574.28	0.631053	0.313881	2.01049	0.0443798	0.177031	Up
Psmd10	462.059	1.29073	0.643223	2.00666	0.0447863	0.143594	Up	Rbm20	156.717	8.12636	1.38012	5.88814	3.90574e-09	7.75137e-08	Up	Stt3b	4168.5	1.53858	0.199152	7.72567	1.11266e-14	7.17853e-13	Up
Psmd2	3803.23	0.594313	0.225851	2.63144	0.00850243	0.0383089	Up	Rbms3	1314.44	1.45214	0.288501	5.0334	4.81844e-07	7.0045e-06	Up	Stx12	4089.91	0.915325	0.240122	3.81191	0.000137896	0.00154838	Up
Psors1c2	34.3498	8.20294	2.54179	3.22723	0.00124995	0.007563	Up	Rbp1	252.592	1.73705	0.610242	2.84649	0.00442034	0.0226239	Up	Stx1a	463.404	3.52991	1.04421	3.38045	0.000723664	0.00648529	Up
Psph	224.195	2.94898	0.674064	4.37492	1.21476e-05	0.000122567	Up	Rcan2	126.673	2.63186	1.20578	2.18272	0.0290568	0.103052	Up	Stx6	1103.67	1.24907	0.351599	3.55254	0.000381536	0.00377961	Up
Ptar1	278.687	2.03312	0.748516	2.7162	0.00660354	0.0309191	Up	Rcan3	1408.2	1.38794	0.262096	5.29555	1.18658e-07	1.89311e-06	Up	Sult4a1	47.1917	8.88194	3.11653	2.84995	0.00437263	0.0293812	Up
Ptchd1	106.756	9.83802	2.24095	4.39011	1.13293e-05	0.000114998	Up	Rcbtb1	1284.8	0.690327	0.262934	2.62548	0.00865274	0.0393906	Up	Surf6	852.455	1.0409	0.43832	2.37474	0.0175611	0.0884698	Up
Pten	4782.15	0.433137	0.195655	2.21378	0.026844	0.0967366	Up	Rcn3	497.004	0.926247	0.425127	2.17875	0.02935	0.103723	Up	Sv2a	744.878	5.16402	1.21671	4.24426	2.19319e-05	0.000304131	Up
Ptgds	157.135	10.3958	2.13824	4.86183	1.16303e-06	1.44309e-05	Up	Reep1	2541.87	1.59816	0.187347	8.5305	1.45717e-17	5.83628e-16	Up	Sv2b	76.926	9.58691	2.449	3.91463	9.05441e-05	0.00107203	Up
Ptges	681.876	11.0708	1.47836	7.48858	6.96249e-14	2.14312e-12	Up	Reep3	7766.66	1.23087	0.127656	9.64208	5.31023e-22	2.80658e-20	Up	Svip	33.0049	5.95285	2.87244	2.0724	0.0382282	0.158471	Up
Ptges3	3431.6	0.727418	0.235885	3.08378	0.00204391	0.0114536	Up	Reep5	2439.26	0.450227	0.215179	2.09234	0.0364085	0.122316	Up	Swap70	3883.96	1.22961	0.274342	4.48202	7.39391e-06	0.000116181	Up
Ptgfrn	3692.43	7.4541	1.79774	4.14638	3.37777e-05	0.000309901	Up	Rell1	3679.62	1.34562	0.166839	8.06537	7.30166e-16	2.62382e-14	Up	Syk	703.057	1.39716	0.585536	2.38613	0.017027	0.0864175	Up
Ptgis	164.768	10.4648	1.71448	6.10375	1.03608e-09	2.10194e-08	Up	Reln	185.063	2.78581	0.62073	4.48796	7.1908e-06	8.18613e-05	Up	Syn1	357.87	4.0618	1.75752	2.31109	0.0208277	0.100866	Up
Ptgs2	56.5154	8.92106	2.14087	4.16703	3.086e-05	0.000285202	Up	Rere	7319.63	0.622653	0.21429	2.90565	0.00366492	0.019344	Up	Syn2	133.84	7.93707	2.04552	3.88022	0.000104361	0.00121298	Up
Ptma	27872.4	0.451396	0.146036	3.09099	0.00199493	0.0112247	Up	Resp18	24.4784	7.85828	2.45459	3.20147	0.0013673	0.00842849	Up	Syngr3	115.734	10.1763	2.72157	3.73914	0.000184653	0.00200394	Up
Ptn	1140.02	4.18266	0.436549	9.58118	9.59432e-22	5.14466e-20	Up	Ret	521.41	5.15259	0.451196	11.4198	3.32883e-30	2.47331e-28	Up	Synj1	1939	1.13694	0.329837	3.44699	0.000566865	0.00529515	Up
Ptp4a1	715.678	0.909503	0.418295	2.17431	0.029682	0.104024	Up	Retsat	270.44	2.48808	0.505937	4.91776	8.75423e-07	1.21736e-05	Up	Synm	3722.77	5.48888	0.436354	12.579	2.75636e-36	5.11809e-34	Up
Ptplad1	1929.69	1.20319	0.352525	3.41305	0.000642406	0.00425699	Up	Rexo2	868.912	0.806958	0.279071	2.89158	0.00383306	0.0200723	Up	Synpr	70.27	9.45655	2.25193	4.19931	2.67726e-05	0.000365924	Up
Ptplb	431.132	1.33235	0.513119	2.59657	0.00941598	0.0417678	Up	Rft1	314.328	1.40843	0.717701	1.96241	0.0497143	0.154967	Up	Syp	1014.05	5.86698	1.00238	5.85304	4.8267e-09	1.50597e-07	Up
Ptpn11	5099.46	1.22931	0.162941	7.54451	4.53991e-14	1.43229e-12	Up	Rftn2	531.908	0.680914	0.346673	1.96414	0.0495139	0.15453	Up	Sypl	5689.52	0.577493	0.236434	2.44251	0.0145855	0.0767376	Up
Ptpn13	99.0241	5.06684	1.82159	2.78154	0.00541012	0.0262548	Up	Rfx4	36.4218	8.43116	2.27914	3.69927	0.000216221	0.00170537	Up	Syt1	397.741	11.9574	1.92336	6.21695	5.06912e-10	1.85982e-08	Up
Ptpn4	583.823	2.5753	0.545063	4.72476	2.30384e-06	2.70804e-05	Up	Rgma	69.3116	2.71617	1.36062	1.99627	0.045904	0.146135	Up	Syt11	1146.93	2.22779	0.770546	2.89118	0.00383794	0.026351	Up
Ptpn5	27.2272	7.86654	2.91059	2.70273	0.00687719	0.0319931	Up	Rgnef	851.034	1.95392	0.332157	5.88251	4.04097e-09	7.97818e-08	Up	Syt15	271.913	2.19246	0.729968	3.0035	0.00266897	0.0194253	Up
Ptprd	2094.31	3.57695	0.304284	11.7553	6.63415e-32	5.32663e-30	Up	Rgs5	861.419	2.63456	0.744693	3.53778	0.000403512	0.00294683	Up	Syt16	27.8701	8.12203	3.18012	2.554	0.0106494	0.0597668	Up
Ptpre	437.445	1.06305	0.480874	2.21066	0.0270594	0.0972818	Up	Rgs6	98.5439	2.05516	0.872082	2.35661	0.0184425	0.0721745	Up	Syt2	184.46	9.41603	2.24434	4.19547	2.72312e-05	0.000371525	Up
Ptprg	13154.7	3.9411	0.181163	21.7544	6.26968e-105	2.2653e-102	Up	Rgs8	855.836	10.5445	1.39048	7.58337	3.367e-14	1.08563e-12	Up	Syt4	183.861	8.43259	1.81583	4.64394	3.41834e-06	5.9078e-05	Up
Ptprj	508.677	3.00848	0.692682	4.34324	1.40397e-05	0.000139873	Up	Rhbdd2	304.685	0.939656	0.464521	2.02285	0.0430885	0.139124	Up	Sytl4	81.514	4.54263	1.47488	3.07999	0.00207006	0.0157322	Up
Ptprk	3938.83	1.27446	0.22349	5.70253	1.18041e-08	2.06844e-07	Up	Rhbdf1	1562.29	0.701823	0.241188	2.90986	0.00361594	0.0191242	Up	Tacc1	5210.56	0.555096	0.21168	2.62234	0.00873294	0.0511218	Up
Ptprm	7747.74	1.05115	0.228429	4.60165	4.19167e-06	4.69783e-05	Up	Rhbdl2	135.395	4.30993	1.49994	2.87339	0.0040609	0.0210739	Up	Tacr3	170.43	9.29711	1.76275	5.27421	1.33328e-07	3.23771e-06	Up
Ptprn	117.956	9.98197	2.23351	4.46919	7.85148e-06	8.24541e-05	Up	Rhobtb1	1104.3	3.02949	0.305566	9.91434	3.60618e-23	1.98584e-21	Up	Tada2a	133.489	2.17502	0.945344	2.30077	0.0214044	0.103153	Up
Ptpro	53.7236	8.8472	2.34097	3.7793	0.000157272	0.00123021	Up	Rhod	96.0972	3.97818	1.09	3.6497	0.000262545	0.00202505	Up	Tbc1d12	960.394	1.45316	0.425844	3.41242	0.000643883	0.00588326	Up
Ptprr	332.378	3.96449	1.14552	3.46088	0.000538415	0.00363454	Up	Rhoj	3522.31	0.786382	0.166627	4.71941	2.36529e-06	3.04166e-05	Up	Tbc1d14	1882.62	2.67573	0.367343	7.284	3.24061e-13	1.83426e-11	Up
Ptprs	1723.97	2.77889	0.429548	6.46934	9.84322e-11	2.23609e-09	Up	Rian	1220.45	3.14176	1.31304	2.39274	0.0167229	0.0669438	Up	Tbc1d9	391.383	2.05032	0.863666	2.37398	0.0175977	0.0886055	Up
Ptprz1	1269.82	7.82609	0.838123	9.33763	9.85103e-21	4.93364e-19	Up	Rimbp2	14.124	7.06416	3.53029	2.00102	0.0453906	0.144836	Up	Tbcel	1036.58	0.986451	0.382484	2.57906	0.00990686	0.0563263	Up
Ptrf	7615.5	0.42164	0.14861	2.83722	0.00455079	0.0227078	Up	Rimkla	29.7807	8.14086	2.35431	3.45786	0.000544494	0.00382214	Up	Tbx1	165.48	10.6927	1.82904	5.84608	5.03293e-09	1.56391e-07	Up
Purb	6093.07	0.461099	0.218844	2.10697	0.0351199	0.1192	Up	Rimklb	119.851	4.35572	1.91271	2.27724	0.0227716	0.0853797	Up	Tbx15	31.1006	8.28028	3.5722	2.31798	0.0204507	0.0993877	Up
Pvalb	228.518	10.9363	3.70025	2.95555	0.00312115	0.0164058	Up	Rims1	50.3104	7.42425	1.97455	3.75997	0.000169931	0.0013887	Up	Tbx4	183.752	10.8434	1.7902	6.05711	1.3859e-09	4.64796e-08	Up
Pvrl1	412.867	2.89678	0.853456	3.39418	0.000688342	0.00450629	Up	Rit2	44.6089	8.7237	2.1716	4.01717	5.89013e-05	0.000541807	Up	Tcea3	52.4784	4.90165	2.12089	2.31113	0.0208257	0.100866	Up
Pwwp2b	361.872	1.15169	0.548398	2.10009	0.0357209	0.120808	Up	Rlbp1	25.6979	7.92857	2.40772	3.29299	0.000991292	0.00639248	Up	Tceal3	69.7472	9.44563	2.34027	4.03612	5.43423e-05	0.000684947	Up
Pxmp3	272.154	1.41048	0.595489	2.3686	0.0178553	0.0702964	Up	Rnaseh2c	718.888	0.842434	0.306524	2.74834	0.00598975	0.0292731	Up	Tceal5	124.811	10.2852	2.28973	4.49188	7.05957e-06	0.000111272	Up
Pygb	2209.26	0.810009	0.257558	3.14496	0.00166109	0.00963575	Up	Rnf103	1264.11	0.690334	0.318806	2.16537	0.0303591	0.106597	Up	Tceal6	103.569	10.0161	2.08105	4.813	1.48682e-06	2.80873e-05	Up
Pygo1	34.5887	6.67984	2.56139	2.60789	0.00911015	0.0406323	Up	Rnf112	27.0848	8.00382	2.46365	3.24876	0.00115907	0.00730596	Up	Tcf23	28.7664	8.16842	2.98746	2.73424	0.00625246	0.0389525	Up
Qars	2058.79	0.920607	0.224267	4.10496	4.0439e-05	0.000364407	Up	Rnf128	75.003	8.0469	2.26323	3.55549	0.000377277	0.00278432	Up	Tcf7	2139.56	2.67076	0.394624	6.76786	1.30698e-11	6.01209e-10	Up
Qk	31259.9	0.412437	0.126759	3.25371	0.0011391	0.00699266	Up	Rnf13	1319.91	1.11463	0.41289	2.69958	0.00694264	0.0327941	Up	Tdg	268.971	2.42908	1.1824	2.05436	0.0399406	0.163609	Up
R74862	43.3127	7.1184	2.09591	3.39632	0.000682975	0.00447889	Up	Rnf139	1212.09	0.674241	0.255183	2.64219	0.00823726	0.0378741	Up	Tdrkh	85.4668	6.22774	1.77468	3.50923	0.000449414	0.00435485	Up
Rab11b	2845.9	0.718854	0.20748	3.46468	0.000530862	0.00359314	Up	Rnf14	2331	0.621002	0.248513	2.49887	0.0124589	0.0527726	Up	Tec	459.473	2.31979	0.65586	3.53701	0.000404677	0.00397523	Up
Rab11fip1	1379.37	3.98782	0.399984	9.96996	2.06305e-23	1.19949e-21	Up	Rnf144b	1104.82	1.6887	0.290081	5.82147	5.83328e-09	1.12992e-07	Up	Tecpr1	2308.79	1.0984	0.289163	3.79855	0.000145547	0.00162709	Up
Rab11fip5	455.325	4.16333	1.09907	3.78803	0.000151845	0.00119453	Up	Rnf149	974.098	1.27672	0.281176	4.54064	5.60825e-06	6.51472e-05	Up	Tecr	1577.99	1.29838	0.368576	3.52267	0.000427215	0.00417508	Up
Rab12	2743.75	1.17537	0.250789	4.68667	2.77688e-06	3.20694e-05	Up	Rnf185	1472.91	1.00451	0.238543	4.21103	2.54205e-05	0.000255702	Up	Tecrl	41.2342	8.6873	2.71886	3.1952	0.00139732	0.0113108	Up
Rab2a	3984.51	0.555007	0.173569	3.19763	0.00138563	0.00823941	Up	Rnf2	1489.81	0.897259	0.320105	2.80302	0.00506269	0.0253543	Up	Tes	1790.26	1.2222	0.284944	4.28924	1.79282e-05	0.000254879	Up
Rab3a	330.126	2.71773	1.24182	2.18851	0.0286328	0.101401	Up	Rnft2	89.4195	4.4051	1.83475	2.40092	0.0163538	0.0656715	Up	Tex11	26.8919	8.07144	3.12176	2.58554	0.00972255	0.0555988	Up
Rab5b	3759.83	0.752968	0.195783	3.84594	0.000120092	0.000973505	Up	Rnpep	1522.53	0.749735	0.21717	3.45229	0.000555844	0.00388762	Up	Tex15	21.2704	7.73205	3.72791	2.0741	0.0380704	0.157989	Up
Rab6a	4298.96	0.887466	0.190028	4.67018	3.00942e-06	3.45637e-05	Up	Robo4	4999.84	0.557804	0.191122	2.91858	0.00351632	0.0187261	Up	Tfpi	2472.13	1.4787	0.45456	3.25304	0.00114178	0.00954159	Up
Rab6b	326.447	6.2317	1.36114	4.57828	4.68808e-06	5.18525e-05	Up	Rora	447.658	4.23264	0.847578	4.99381	5.92009e-07	8.44629e-06	Up	Tfrc	23604.1	6.36024	0.798025	7.96997	1.58716e-15	1.09349e-13	Up
Rabac1	671.916	0.762789	0.375216	2.03293	0.0420596	0.137229	Up	Rpap3	577.759	0.771677	0.346353	2.22801	0.02588	0.0940979	Up	Tgfa	1897.86	4.64102	0.868452	5.34401	9.09138e-08	2.29943e-06	Up
Rai14	2987.05	2.11764	0.309724	6.83719	8.07607e-12	2.05974e-10	Up	Rph3a	87.6703	5.11766	1.43997	3.55401	0.0003794	0.00279462	Up	Tgfbr3	1148.29	1.29514	0.494846	2.61727	0.00886367	0.051629	Up
Rala	2007.24	1.31629	0.286199	4.59921	4.24093e-06	4.74252e-05	Up	Rpl15	10278.3	0.366623	0.146364	2.50487	0.0122498	0.0520159	Up	Thsd1	2633.83	1.45846	0.256785	5.67967	1.34953e-08	3.96679e-07	Up
Ralgapa1	2662.75	0.650897	0.223561	2.91149	0.00359707	0.0185982	Up	Rpl26	30.7899	8.18994	3.58511	2.28443	0.022346	0.0841325	Up	Tiam1	6727.3	3.46921	0.394891	8.78524	1.56034e-18	1.37328e-16	Up
Raly	4686.05	0.779514	0.19141	4.07249	4.6514e-05	0.00041302	Up	Rpl27a	3326.22	0.443533	0.209174	2.1204	0.0339724	0.116033	Up	Tirap	722.396	1.20538	0.451233	2.67131	0.00755565	0.0455975	Up
Ralyl	28.4332	7.92908	2.86159	2.77087	0.00559075	0.0270104	Up	Rpl36	1912.68	0.473236	0.205605	2.30167	0.0213536	0.0811111	Up	Tjp2	3455.1	1.51186	0.278287	5.43273	5.5499e-08	1.44256e-06	Up
Ramp2	3724.85	0.658258	0.258861	2.5429	0.0109935	0.0474074	Up	Rpl37a	3617.61	0.656154	0.299117	2.19364	0.0282616	0.100991	Up	Tle1	929.642	0.943414	0.415851	2.26863	0.0232906	0.110889	Up
Ran	4058.93	0.598532	0.189716	3.15489	0.00160557	0.00934582	Up	Rpl38	3277.16	1.78768	0.318251	5.6172	1.94077e-08	3.46277e-07	Up	Tlr3	1007.06	0.990217	0.380822	2.60021	0.00931678	0.0537565	Up
Ranbp17	148.053	3.11713	1.45616	2.14065	0.0323024	0.111617	Up	Rpl5	23932.4	0.32095	0.159437	2.01302	0.0441125	0.14158	Up	Tm2d3	210.714	1.78819	0.795389	2.24819	0.024564	0.115578	Up
Rap1gap	99.5854	7.40391	2.00308	3.69627	0.000218794	0.00164611	Up	Rpn2	3348.76	0.39995	0.170866	2.34073	0.0192461	0.0745982	Up	Tm7sf2	30.232	8.24002	2.92658	2.81558	0.00486888	0.0319128	Up
Rap1gap2	64.5416	4.98734	1.89131	2.63698	0.00836469	0.0378371	Up	Rpp38	84.2877	1.99059	0.856051	2.32532	0.0200549	0.0769957	Up	Tm9sf3	10608.7	0.345914	0.176425	1.96069	0.0499157	0.192507	Up
Rap1gds1	2804.43	0.481127	0.234405	2.05255	0.0401164	0.132282	Up	Rpph1	336.66	2.28837	0.762525	3.00105	0.00269054	0.015042	Up	Tmc7	1600.37	4.85044	0.332709	14.5787	3.84025e-48	9.91046e-46	Up
Rapgef4	1174.4	4.10945	0.400895	10.2507	1.17489e-24	7.13159e-23	Up	Rps11	6721.59	0.583106	0.201676	2.8913	0.00383653	0.0200837	Up	Tmed8	652.829	1.09032	0.514322	2.11992	0.0340125	0.14637	Up
Rapgef6	2587.22	1.27481	0.244095	5.2226	1.7643e-07	2.57683e-06	Up	Rps6ka3	1557.54	0.566894	0.258717	2.19118	0.028439	0.101483	Up	Tmeff2	106.048	10.0502	2.50124	4.01807	5.86764e-05	0.000732301	Up
Rasgrp3	15752.8	0.358802	0.156715	2.28952	0.022049	0.083067	Up	Rps6ka6	71.1759	3.67822	1.31001	2.80778	0.00498838	0.0250756	Up	Tmem104	572.475	1.29916	0.541137	2.40079	0.0163596	0.0839259	Up
Rasgrp4	641.344	1.18287	0.539247	2.19356	0.0282671	0.10027	Up	Rps7	14335.4	0.919332	0.216744	4.24155	2.21977e-05	0.000225944	Up	Tmem107	20.2026	7.65878	3.44392	2.22386	0.026158	0.120692	Up
Rassf2	1352.82	10.0589	0.798081	12.6038	2.01162e-36	1.90789e-34	Up	Rragb	101.102	4.59382	1.77565	2.58713	0.00967794	0.0430566	Up	Tmem111	858.46	0.896566	0.456333	1.96472	0.0494468	0.191182	Up
Rassf3	3481.62	0.780562	0.238975	3.2663	0.00108963	0.00674077	Up	Rras2	1366.37	1.40919	0.339626	4.14923	3.33592e-05	0.000326792	Up	Tmem123	5296.79	1.10825	0.218594	5.06988	3.98074e-07	8.69594e-06	Up
Rassf8	1217.23	2.69174	0.34561	7.78836	6.78867e-15	2.30465e-13	Up	Rrp1	4556.29	0.607769	0.161687	3.75892	0.000170645	0.00139232	Up	Tmem130	136.997	10.4196	2.0157	5.16923	2.35056e-07	5.42267e-06	Up
Rassf9	2763.6	3.94325	1.17297	3.36175	0.000774493	0.00499699	Up	Rsc1a1	25.6897	7.92871	3.73546	2.12256	0.0337911	0.115596	Up	Tmem131	3799.11	0.608639	0.235455	2.58494	0.00973946	0.0556238	Up
Rbbp7	5044.42	0.604696	0.159189	3.79861	0.000145511	0.00115247	Up	Rsph3b	127.524	1.69576	0.796849	2.12808	0.0333306	0.114451	Up	Tmem132b	44.4396	8.79524	2.72858	3.22337	0.0012669	0.0104045	Up
Rbfox1	107.792	7.40326	1.56908	4.71822	2.37917e-06	2.7901e-05	Up	Rtn3	5449.5	0.855865	0.141782	6.03647	1.57517e-09	3.31411e-08	Up	Tmem132c	208.809	3.32023	1.64748	2.01534	0.0438689	0.175554	Up
Rbm20	139.444	10.2242	1.83264	5.57894	2.41994e-08	4.03102e-07	Up	Rufy3	652.723	1.25606	0.465554	2.69799	0.00697589	0.0328935	Up	Tmem132d	42.3714	8.7266	4.04447	2.15766	0.0309542	0.136214	Up
Rbm41	316.329	1.92044	0.590338	3.25311	0.00114148	0.00700157	Up	Samd8	1649.06	0.983103	0.341541	2.87844	0.00399653	0.0207728	Up	Tmem136	165.404	3.93186	0.96648	4.06822	4.73736e-05	0.000606653	Up
Rbms3	1212.25	1.3146	0.389734	3.37305	0.000743392	0.00482711	Up	Samm50	1780.73	0.513183	0.214211	2.39569	0.0165889	0.0665287	Up	Tmem143	100.32	2.89819	1.3206	2.1946	0.0281921	0.127375	Up
Rcan3	1252.01	1.43575	0.445093	3.22572	0.00125655	0.00759083	Up	Sarm1	56.0754	2.9423	1.21614	2.41938	0.0155471	0.0630078	Up	Tmem151b	207.091	11.0158	2.18411	5.04362	4.56817e-07	9.67385e-06	Up
Reep1	2599.2	0.949302	0.246494	3.85121	0.000117534	0.000953786	Up	Satb1	218.651	2.74717	0.817012	3.36245	0.000772536	0.0051397	Up	Tmem154	837.583	4.91843	0.589789	8.33931	7.47284e-17	5.68907e-15	Up
Reep3	8434.44	0.461442	0.151468	3.04647	0.00231547	0.0127633	Up	Scamp1	3241.11	1.92437	0.24328	7.91011	2.57157e-15	8.92792e-14	Up	Tmem170b	595.732	1.38447	0.698232	1.98283	0.0473867	0.185762	Up
Rell1	3732.94	0.79325	0.233506	3.39713	0.000680962	0.00446955	Up	Scamp5	229.564	11.0875	1.86795	5.93568	2.92636e-09	5.87563e-08	Up	Tmem184b	2895.16	0.733937	0.250181	2.93362	0.00335034	0.0235297	Up
Reln	192.6	1.59228	0.786171	2.02537	0.0428298	0.139198	Up	Scarb1	3839.4	0.963963	0.148079	6.5098	7.52494e-11	1.82833e-09	Up	Tmem198	19.7492	7.62576	3.423	2.2278	0.0258938	0.119763	Up
Reps2	125.014	8.65251	2.07432	4.17125	3.02929e-05	0.000280676	Up	Sccpdh	896.799	0.968023	0.304059	3.18367	0.0014542	0.00888582	Up	Tmem203	67.6695	3.99335	1.59592	2.50222	0.0123416	0.0672798	Up
Resp18	21.9979	7.55932	2.88964	2.61601	0.00889647	0.0398359	Up	Scd2	11818.2	1.76038	0.177968	9.89153	4.53049e-23	2.47968e-21	Up	Tmem204	2553.84	0.932182	0.239383	3.8941	9.85628e-05	0.00115174	Up
Ret	455.939	10.4878	1.4995	6.99422	2.66743e-12	7.12646e-11	Up	Scg2	281.265	11.3806	1.76929	6.43229	1.25698e-10	2.96508e-09	Up	Tmem33	1679.61	0.868488	0.372287	2.33284	0.0196564	0.096327	Up
Rfng	348.407	1.3562	0.679231	1.99667	0.045861	0.146452	Up	Scg3	413.497	6.10965	2.60912	2.34165	0.0191985	0.074451	Up	Tmem35	78.5117	21.8217	3.52734	6.18644	6.15363e-10	2.24416e-08	Up
Rftn2	410.077	1.33539	0.464261	2.87638	0.00402269	0.020471	Up	Scg5	145.622	10.4308	1.97015	5.29441	1.19404e-07	1.90225e-06	Up	Tmem38a	183.32	3.56061	1.13386	3.14025	0.00168803	0.0133171	Up
Rfx3	428.063	1.25036	0.490044	2.55153	0.0107252	0.0465234	Up	Scgb3a1	61.12	3.02726	1.50638	2.00963	0.0444708	0.142551	Up	Tmem44	2339.22	1.16116	0.251622	4.61469	3.93678e-06	6.69736e-05	Up
Rfx4	33.5741	5.55844	2.21581	2.50854	0.0121231	0.0514164	Up	Schip1	922.412	1.06949	0.343161	3.11658	0.00182961	0.010794	Up	Tmem51	345.445	2.21286	1.12801	1.96174	0.0497928	0.19213	Up
Rgma	62.8135	2.66345	1.29123	2.06272	0.0391395	0.12971	Up	Scn1a	375.419	10.3795	2.6953	3.85096	0.000117656	0.0010053	Up	Tmem55b	472.669	1.80816	0.529056	3.41772	0.000631491	0.00579571	Up
Rgnef	723.642	2.37189	0.418213	5.67148	1.4157e-08	2.46085e-07	Up	Scn1b	296.824	11.4585	2.94481	3.89108	9.97978e-05	0.000869626	Up	Tmem59l	66.782	9.38288	2.6007	3.60783	0.000308767	0.00316159	Up
Rgs12	1875.41	1.72201	0.259469	6.63667	3.2084e-11	7.74045e-10	Up	Scn2a1	284.787	4.65126	0.911717	5.10165	3.36707e-07	5.02773e-06	Up	Tmem65	1034.19	1.42266	0.383215	3.71242	0.000205283	0.00219189	Up
Rgs16	503.176	3.21507	1.08502	2.96316	0.00304502	0.0160836	Up	Scn2b	229.305	4.53656	1.3753	3.29859	0.000971702	0.00628725	Up	Tmem66	5532.42	1.23362	0.252579	4.88408	1.03911e-06	2.0258e-05	Up
Rgs5	747.739	3.10889	0.964681	3.22272	0.00126981	0.00765569	Up	Scn4b	19.1214	7.50164	2.70207	2.77626	0.00549881	0.0271411	Up	Tmem68	748.455	1.02426	0.453779	2.25718	0.0239967	0.11354	Up
Rgs7	56.3592	8.91629	2.50308	3.56213	0.000367865	0.00259765	Up	Scn8a	710.28	5.47984	0.815928	6.71607	1.86687e-11	4.7934e-10	Up	Tmem86a	691.166	1.25575	0.450338	2.78847	0.00529577	0.0341928	Up
Rgs8	773.648	12.6957	3.12555	4.06191	4.8673e-05	0.000430427	Up	Scoc	1968.74	0.372002	0.18967	1.96131	0.0498429	0.155305	Up	Tmem86b	20.8462	7.70338	3.36877	2.28671	0.022213	0.10629	Up
Rhbdd2	247.261	1.40558	0.670802	2.09538	0.0361375	0.121837	Up	Scp2	1777.77	0.580557	0.212955	2.72619	0.00640698	0.0308672	Up	Tmem90a	16.8583	7.39718	3.63207	2.03663	0.0416869	0.169035	Up
Rhbdf1	1090.16	1.95679	0.323873	6.04187	1.52342e-09	3.01406e-08	Up	Scrn1	125.651	4.0676	1.37221	2.96427	0.00303403	0.0165944	Up	Tmem90b	46.2343	8.85233	2.76846	3.19756	0.00138595	0.0112369	Up
Rhbdf2	178.876	2.02084	0.915129	2.20826	0.0272261	0.0977191	Up	Scrt1	142.858	3.27559	1.62835	2.0116	0.0442621	0.141971	Up	Tmem98	535.904	1.33926	0.521764	2.5668	0.0102643	0.0579259	Up
Rhbdl2	116.077	7.58169	1.45789	5.20046	1.98792e-07	2.88124e-06	Up	Scrt2	67.026	3.81749	1.24554	3.06494	0.00217713	0.012555	Up	Tmem9b	1165.74	1.23815	0.439281	2.81858	0.00482362	0.0316665	Up
Rhbdl3	46.14	8.62785	3.66155	2.35634	0.018456	0.0723321	Up	Sdad1	853.535	0.789521	0.358705	2.20103	0.0277339	0.0996142	Up	Tmod2	641.512	2.35404	0.779888	3.01843	0.00254086	0.0186714	Up
Rhoa	14532.9	0.393629	0.158899	2.47723	0.0132406	0.0550936	Up	Sdc3	4185.42	0.625889	0.17274	3.6233	0.000290873	0.00221906	Up	Tmod4	36.2243	8.50049	2.79717	3.03896	0.00237394	0.0176665	Up
Rhob	4648.4	0.536674	0.182143	2.94645	0.00321447	0.0168554	Up	Sdcbp	8047.69	0.550206	0.160082	3.43703	0.000588123	0.00407815	Up	Tmsb10	9506.5	0.473385	0.240099	1.97163	0.0486522	0.189215	Up
Rhobtb1	1321.1	1.01067	0.393706	2.56706	0.0102563	0.0447885	Up	Sdhd	1439.13	0.58806	0.231415	2.54115	0.011049	0.0478281	Up	Tmsb4x	51293.1	1.12097	0.24628	4.55161	5.32369e-06	8.6601e-05	Up
Rhobtb3	429.15	1.97811	0.608646	3.25001	0.001154	0.00705277	Up	Sdr39u1	433.275	1.39646	0.391537	3.56661	0.000361633	0.00268305	Up	Tmx4	1498.64	1.21852	0.447653	2.72201	0.00648854	0.0400722	Up
[truncated: 21,331 more rows]

## Sheet: (B) Venn 1
Liver-Up	Lung-Up	Kidney-Up	Liver-Dn	Lung-Dn	Kidney-Dn		All-Up	Liver-log2FC	Lung-log2FC	Kidney-log2FC	Average-log2FC		All-Dn	Liver-log2FC	Lung-log2FC	Kidney-log2FC	Average-log2FC
0610007P14Rik	0610007P14Rik	0610010F05Rik	0610012H03Rik	0610030E20Rik	0610005C13Rik		Nap1l2	22.4716	22.7354	22.8539	22.687		Gbp10	-9.90127	-13.4892	-28.2486	-17.213
1110002L01Rik	0610031J06Rik	0610031J06Rik	0610030E20Rik	0610040F04Rik	0610040F04Rik		Atp6ap1l	22.4163	22.6783	22.8008	22.6318		Srp54c	-10.7498	-11.5769	-24.4777	-15.6015
1110004E09Rik	0610037P05Rik	1110008P14Rik	0610040F04Rik	1110038B12Rik	1110032F04Rik		Nxph4	22.3209	22.5847	22.7054	22.537		Tgtp2	-13.3262	-14.7033	-14.7098	-14.2464
1110012J17Rik	1110001A16Rik	1110012J17Rik	1190007F08Rik	1110038F14Rik	1190002H23Rik		Cntn6	22.2915	22.4197	22.767	22.4927		Cldn7	-8.89943	-6.91913	-23.5743	-13.131
1110050K14Rik	1110002B05Rik	1110050K14Rik	1300017J02Rik	1110050K14Rik	1500012F01Rik		Chrna4	20.72	22.4656	22.5894	21.925		Plau	-11.9762	-8.8442	-13.1024	-11.3076
1110065P20Rik	1110012J17Rik	1110054M08Rik	1600021P15Rik	1190002H23Rik	1500017E21Rik		Gm1987	13.3472	13.6484	13.7727	13.5894		Plac8	-11.7388	-10.6149	-11.3967	-11.2501
1110067D22Rik	1110020G09Rik	1110065P20Rik	1600029D21Rik	1500012F01Rik	1600016N20Rik		Zic2	11.3637	13.1045	13.229	12.5657		Bik	-11.1594	-10.7112	-10.5831	-10.8179
1190002H23Rik	1110031I02Rik	1110067D22Rik	1700001D01Rik	1600002D24Rik	1700001D01Rik		Mfsd2a	11.226	13.4263	12.2856	12.3126		C3	-11.4793	-10.887	-8.83862	-10.4016
1300010F03Rik	1110034G24Rik	1190007I07Rik	1700007P06Rik	1700010I02Rik	1700007L15Rik		Slc1a6	12.0778	13.8893	10.6347	12.2006		Aqp1	-11.8995	-10.599	-8.16487	-10.2211
1500009C09Rik	1190007I07Rik	1300010F03Rik	1700010I02Rik	1700017B05Rik	1700007P06Rik		Slco1a4	10.247	15.174	11.1031	12.1747		Egfem1	-10.8404	-10.8286	-8.40407	-10.0243
1500011B03Rik	1300010F03Rik	1500003O03Rik	1700021K19Rik	1700025G04Rik	1700011H14Rik		Nfasc	12.6715	12.9638	10.6675	12.1009		Robo3	-9.102	-7.77582	-12.3475	-9.74177
1500031L02Rik	1500003O03Rik	1500009C09Rik	1700025G04Rik	1700102P08Rik	1700017B05Rik		Elmod1	11.7485	12.0382	12.167	11.9846		Muc4	-8.99859	-9.57086	-10.3058	-9.6251
1600014C10Rik	1500009C09Rik	1500031L02Rik	1700029I15Rik	1700110I01Rik	1700019L03Rik		Cadps	11.5883	11.8766	12.0061	11.8237		Snai1	-9.47188	-9.42045	-9.82232	-9.57155
1700003F17Rik	1500011B03Rik	1600012F09Rik	1700037C18Rik	1700110M21Rik	1700020M21Rik		Stmn3	11.5441	11.8351	11.9634	11.7809		Gpr183	-11.5604	-6.95877	-9.61366	-9.37762
1700010I14Rik	1500031L02Rik	1700001C19Rik	1700047I17Rik2	1700112E06Rik	1700025G04Rik		Abcc6	11.482	11.7836	11.9077	11.7245		Nup210l	-10.0242	-8.82407	-9.14775	-9.33202
1700011J10Rik	1600012F09Rik	1700010I14Rik	1700071M16Rik	1700113I22Rik	1700029F09Rik		Dner	12.516	14.3335	8.24727	11.6989		Cdk18	-9.77513	-7.54181	-10.5178	-9.27824
1700020L24Rik	1600012H06Rik	1700019E19Rik	1700112E06Rik	1810006K21Rik	1700034H14Rik		Slc44a5	9.71394	12.4889	12.6107	11.6045		Scn4a	-9.55929	-9.08795	-9.1168	-9.25468
1700052N19Rik	1600014C10Rik	1700019G17Rik	1700128F08Rik	1810011O10Rik	1700055N04Rik		Spock3	10.3129	12.1364	12.266	11.5718		Tmprss2	-9.42859	-8.22573	-10.0718	-9.24203
1810041L15Rik	1700001C19Rik	1700020L24Rik	1810011O10Rik	1810026B05Rik	1700081L11Rik		Prmt8	11.7568	12.0458	10.7409	11.5145		Hoxa3	-9.7857	-9.92893	-7.89163	-9.20209
1810046J19Rik	1700020L24Rik	1700026J04Rik	1810020O05Rik	2010109I03Rik	1810006J02Rik		Grin1	11.7132	12.0018	10.6976	11.4709		Cyp4b1	-11.0502	-9.17496	-7.23516	-9.15344
2010106G01Rik	1700030C10Rik	1700052N19Rik	1810034E14Rik	2010111I01Rik	1810011O10Rik		AI593442	12.1738	11.0442	11.1576	11.4585		Muc1	-8.46165	-9.55569	-9.39666	-9.138
2010300C02Rik	1700095A21Rik	1700088E04Rik	1810064F22Rik	2010310C07Rik	1810022K09Rik		Ppp2r2c	11.9943	12.2864	9.99371	11.4248		AI607873	-11.1004	-7.27149	-8.38569	-8.91919
2010317E24Rik	1810037I17Rik	1700128F08Rik	2200002D01Rik	2200002K05Rik	1810026B05Rik		Scg2	11.0893	11.3806	11.5089	11.3263		Hoxb5	-9.23268	-8.20963	-8.71489	-8.71907
2310001A20Rik	1810041L15Rik	1810013L24Rik	2200002K05Rik	2210016F16Rik	1810034E14Rik		Rgs8	12.6957	10.5445	10.6966	11.3123		Slc45a3	-9.61694	-7.9299	-8.48224	-8.67636
2310005G13Rik	1810046J19Rik	2010011I20Rik	2210039B01Rik	2210039B01Rik	2200002D01Rik		Syt1	10.0706	11.8287	11.9574	11.2856		Mndal	-9.46885	-6.72605	-9.58788	-8.59426
2310022B05Rik	2010011I20Rik	2010110P09Rik	2310003C23Rik	2210404O07Rik	2210016F16Rik		Psd2	9.86377	12.6	11.3033	11.2557		Runx1	-7.90078	-9.02113	-8.8126	-8.57817
2310039H08Rik	2010106G01Rik	2010300C02Rik	2310008H09Rik	2310003F16Rik	2310039L15Rik		Slc6a1	10.5139	12.2719	10.9666	11.2508		Cd36	-10.2949	-9.80064	-5.35238	-8.48262
2310044G17Rik	2010110P09Rik	2310001A20Rik	2310010J17Rik	2310004N24Rik	2310067B10Rik		Slco1c1	10.5359	11.5902	11.3983	11.1748		Trpm5	-8.52082	-8.12907	-8.6339	-8.42793
2610019F03Rik	2010300C02Rik	2310005G13Rik	2310010M20Rik	2310007B03Rik	2410001C21Rik		Zic3	7.08615	14.8069	10.7356	10.8762		Hp	-8.28843	-8.04411	-8.74483	-8.35912
2610109H07Rik	2310001A20Rik	2310009B15Rik	2310014F07Rik	2310033P09Rik	2410003L11Rik		Ppp1r17	8.91295	11.7416	11.8709	10.8418		Fam129c	-8.91503	-7.51837	-8.56138	-8.33159
2610301B20Rik	2310005G13Rik	2310045N01Rik	2310021P13Rik	2310039L15Rik	2410089E03Rik		Eef1a2	12.1702	7.67022	12.5887	10.8097		Pou3f1	-8.41718	-8.4351	-7.97589	-8.27606
2610305D13Rik	2310008H09Rik	2310046O06Rik	2310028H24Rik	2310067B10Rik	2510012J08Rik		Cend1	11.0534	9.88152	11.4715	10.8022		Mx1	-8.62804	-8.06362	-7.78585	-8.15917
2700023E23Rik	2310009B15Rik	2310061I04Rik	2310039L15Rik	2410016O06Rik	2510049J12Rik		Nalcn	10.5489	10.8381	10.9672	10.7847		Ccdc160	-7.80652	-7.89631	-8.70111	-8.13465
2810055F11Rik	2310022B05Rik	2410002O22Rik	2310067B10Rik	2610002D18Rik	2610035D17Rik		Ap3b2	10.5213	10.8106	10.9396	10.7571		Tulp2	-8.6455	-7.6415	-7.90627	-8.06442
2810405K02Rik	2310046O06Rik	2510009E07Rik	2410021H03Rik	2610034B18Rik	2610203C22Rik		Gabbr2	11.9996	10.8121	9.42494	10.7455		Hoxa5	-7.30419	-8.29801	-7.66859	-7.75693
2810407C02Rik	2410003K15Rik	2610019F03Rik	2410022L05Rik	2610035D17Rik	2700081O15Rik		Clstn3	7.73012	13.3507	11.0882	10.723		7530416G11Rik	-8.33068	-7.39231	-7.53142	-7.75147
2810459M11Rik	2410004N09Rik	2610109H07Rik	2700046G09Rik	2610301G19Rik	2810008M24Rik		Arhgef33	12.0364	7.60022	12.4546	10.6971		Nod2	-6.48618	-8.30604	-7.99349	-7.59524
2900011O08Rik	2410015M20Rik	2610203C20Rik	2700070H01Rik	2610307P16Rik	2810055G20Rik		Clvs1	10.4549	10.7448	10.8737	10.6911		Gm12185	-6.38213	-8.72572	-7.37987	-7.49591
2900026A02Rik	2410042D21Rik	2700046A07Rik	2700081O15Rik	2700046A07Rik	2810405F15Rik		Myo16	10.4374	10.7276	10.8564	10.6738		Itga2b	-9.13708	-6.23168	-6.88181	-7.41686
3110082D06Rik	2410137F16Rik	2700089E24Rik	2810001G20Rik	2700046G09Rik	2810442N19Rik		Ptgds	10.3958	10.685	10.814	10.6316		F8	-10.7582	-2.91041	-8.46188	-7.37684
3632451O06Rik	2510002D24Rik	2810002D19Rik	2810013P06Rik	2700081O15Rik	2810474O19Rik		Sept3	10.7295	8.57503	12.5705	10.625		Trim69	-7.35339	-7.04247	-6.77239	-7.05609
3830431G21Rik	2510009E07Rik	2810407C02Rik	2810021B07Rik	2700099C18Rik	3110099E03Rik		Gabrg2	11.5122	11.8001	8.53579	10.616		Slfn2	-7.6859	-5.33171	-8.12292	-7.04684
4632428N05Rik	2610001J05Rik	2810459M11Rik	2810025M15Rik	2810006K23Rik	4831426I19Rik		Slc7a3	8.80304	12.1686	10.8525	10.6081		Hoxb2	-7.13029	-6.63342	-7.34265	-7.03546
4632434I11Rik	2610017I09Rik	2900008C10Rik	2810055G20Rik	2810025M15Rik	4833427F10Rik		Ina	9.35129	11.1188	11.2478	10.5726		Cebpb	-7.50653	-6.54433	-6.88267	-6.97784
4833417C18Rik	2610019F03Rik	2900011O08Rik	2810410L24Rik	2810405F15Rik	4921508A21Rik		Grid2	8.68421	10.6841	12.2997	10.556		Nlrp1b	-7.22215	-6.98168	-6.31819	-6.84067
4921507P07Rik	2610203C20Rik	2900097C17Rik	2810442I21Rik	2810442I21Rik	4930426L09Rik		Snap25	9.58779	12.4704	9.58366	10.5473		Hpgd	-7.3348	-9.02421	-3.65479	-6.67127
4930412O13Rik	2610301B20Rik	3110047P20Rik	2810474O19Rik	3110003A17Rik	4930432J09Rik		Tbx1	10.2647	10.5703	10.6927	10.5092		Hoxb3	-7.02477	-6.00004	-6.79361	-6.60614
4930452B06Rik	2700089E24Rik	3110082D06Rik	3110062M04Rik	3110062M04Rik	4930444M15Rik		Slc22a8	10.3196	13.8433	7.26865	10.4772		Rerg	-8.68866	-5.66741	-5.32885	-6.56164
4930506M07Rik	2810055F11Rik	3830431G21Rik	3830406C13Rik	4831426I19Rik	4930470H14Rik		Mobp	10.7088	11.0016	9.69424	10.4682		Serpina3g	-6.79835	-5.14481	-7.63192	-6.52502
4930523C07Rik	2810407C02Rik	4632428N05Rik	4632428C04Rik	4832428D23Rik	4930481A15Rik		Cbln2	10.161	10.4608	10.5857	10.4025		Iigp1	-5.77875	-6.21093	-7.52066	-6.50345
4930550C14Rik	2810432L12Rik	4833424O15Rik	4732418C07Rik	4833419F23Rik	4930503L19Rik		Acsl6	9.16331	10.9328	11.0618	10.386		Fas	-6.60153	-5.53338	-7.14202	-6.42564
4930556M19Rik	2810459M11Rik	4833439L19Rik	4831426I19Rik	4921515E04Rik	4930526L06Rik		6330407J23Rik	10.5824	10.874	9.56796	10.3414		Hoxb4	-6.79622	-5.91164	-6.38696	-6.36494
4930578C19Rik	2900011O08Rik	4921507P07Rik	4832428D23Rik	4930402F06Rik	4931431C16Rik		Mtap7d2	11.0048	9.82945	9.99045	10.2749		Gm12250	-4.90344	-5.93526	-7.94865	-6.26245
4931406P16Rik	2900026A02Rik	4922501C03Rik	4833419F23Rik	4930402H24Rik	4931440P22Rik		Lrfn5	10.0124	10.3013	10.4306	10.2481		Fam167b	-7.84905	-3.71947	-7.18431	-6.25094
4933411K20Rik	2900064A13Rik	4930443O20Rik	4833427F10Rik	4930422G04Rik	4932438A13Rik		Kcna1	9.50032	11.26	9.95438	10.2382		Arhgap6	-5.08359	-6.81571	-6.65068	-6.18333
4933424B01Rik	2900092D14Rik	4930486L24Rik	4921508A21Rik	4930427A07Rik	4933407C03Rik		Tmem130	9.99865	10.2921	10.4196	10.2368		Fam166a	-5.91433	-5.68771	-6.93852	-6.18018
4933431E20Rik	2900097C17Rik	4930520O04Rik	4921513D23Rik	4930452B06Rik	4933408B17Rik		Gabrb2	12.1618	8.35099	10.1369	10.2165		Gfpt2	-6.83629	-5.07451	-6.52133	-6.14404
5330437I02Rik	3110047P20Rik	4930550C14Rik	4921515E04Rik	4930470H14Rik	4933432I03Rik		Kcnma1	11.9352	6.30671	12.3529	10.1982		Nlrc5	-4.0883	-6.61165	-7.34666	-6.01554
5430407P10Rik	3632451O06Rik	4930572J05Rik	4930402H24Rik	4930474G06Rik	4933432I09Rik		Cnksr2	9.93737	10.2279	10.3566	10.1739		Abcc3	-6.43998	-5.15898	-6.40681	-6.00193
5730403B10Rik	3830431G21Rik	4930594C11Rik	4930415O20Rik	4930481A15Rik	5031434C07Rik		B3gat1	9.85753	10.1456	10.2751	10.0927		Slc25a2	-5.44619	-6.06506	-6.22881	-5.91336
5730508B09Rik	4632428N05Rik	4931406P16Rik	4930428E23Rik	4930503L19Rik	5033411D12Rik		Vstm2a	9.85552	10.1437	10.2732	10.0908		Rangrf	-5.91131	-4.72127	-6.93155	-5.85471
6030419C18Rik	4930444A02Rik	4933411K20Rik	4930470H14Rik	4930507D05Rik	6230427J02Rik		Ugt8a	9.8322	10.1317	10.2568	10.0736		H19	-4.58456	-7.13484	-5.34966	-5.68969
6230409E13Rik	4930550C14Rik	4933431E20Rik	4930503L19Rik	4930511M06Rik	6430548M08Rik		Chgb	9.33325	7.84324	12.9444	10.0403		Myo7a	-8.29558	-3.60795	-4.93911	-5.61421
6330403K07Rik	4930578C19Rik	4933439F18Rik	4930511M06Rik	4930521E06Rik	6720489N17Rik		Nefl	11.1085	8.36678	10.6118	10.029		Plvap	-4.5588	-5.73206	-6.50069	-5.59718
6330407J23Rik	4930594C11Rik	5330437I02Rik	4930512B01Rik	4930534B04Rik	7530416G11Rik		Mmd2	9.77568	10.0706	10.1976	10.0146		Xdh	-6.18454	-5.93134	-4.6046	-5.57349
6330439K17Rik	4933409K07Rik	5430407P10Rik	4930524E20Rik	4930564K09Rik	9030224M15Rik		Epha8	9.76157	10.0507	10.1799	9.99738		Ptgs1	-7.16044	-3.96327	-5.59497	-5.57289
6330527O06Rik	4933431E20Rik	5430417L22Rik	4930534B04Rik	4931406B18Rik	9030418K01Rik		Foxl2os	8.56557	11.367	10.0515	9.99472		Upp1	-5.11178	-5.61044	-5.9018	-5.54134
6430598A04Rik	5430407P10Rik	5730469M10Rik	4930562C15Rik	4931414P19Rik	9130017N09Rik		Gm694	9.74962	10.0552	10.1776	9.99413		Ston1	-6.39409	-5.40152	-4.64305	-5.47955
6430704M03Rik	5430416O09Rik	5830432E09Rik	4930578E11Rik	4931440F15Rik	9130206I24Rik		Scn1a	9.06625	10.3795	10.4931	9.97961		AI662270	-6.96685	-3.16394	-6.20921	-5.44667
6720456B07Rik	5730403B10Rik	6030419C18Rik	4930592I03Rik	4931440P22Rik	9330179D12Rik		Cacng2	11.3656	9.16654	9.34166	9.95795		Gpihbp1	-6.58935	-4.43421	-5.27473	-5.43276
8030462N17Rik	5730455P16Rik	6330406I15Rik	4931406B18Rik	4932411G14Rik	9430023L20Rik		Scg3	11.6229	6.10965	12.0435	9.92535		4831426I19Rik	-4.93644	-4.57676	-6.54541	-5.35287
8430419L09Rik	6030419C18Rik	6330407J23Rik	4931406H21Rik	4932411L15	9630013A20Rik		Atp1a3	8.2082	11.5427	9.76604	9.83898		Prelp	-6.73009	-4.50431	-4.68086	-5.30509
8430429K09Rik	6230409E13Rik	6330439K17Rik	4931408A02Rik	4932411N23Rik	9930111J21Rik1		Slc6a11	12.1388	7.17143	10.1404	9.81689		Ada	-5.11726	-3.96862	-6.72366	-5.26985
9030612E09Rik	6330406I15Rik	6430573F11Rik	4931408D14Rik	4933407C03Rik	A130077B15Rik		Sobp	11.247	6.52418	11.6727	9.8146		Dand5	-5.25189	-5.07613	-5.00453	-5.11085
9330182L06Rik	6330407J23Rik	6430704M03Rik	4931429L15Rik	4933411K16Rik	A330023F24Rik		Cdr1	9.57464	9.86454	9.99349	9.81089		Meis2	-5.22787	-3.72001	-6.33611	-5.09466
9430020K01Rik	6330439K17Rik	6720456B07Rik	4931440P22Rik	4933412E12Rik	A430078G23Rik		Gsg1l	8.70251	9.03205	11.6411	9.7919		Cd274	-4.6826	-4.39315	-6.1448	-5.07352
9430031J16Rik	6330527O06Rik	8030462N17Rik	4932411G14Rik	4933432I03Rik	A630033H20Rik		Fgfbp1	10.7953	11.1002	7.47778	9.79109		Gata6	-4.81546	-6.02998	-4.28861	-5.04468
9430038I01Rik	6330578E17Rik	9030612E09Rik	4932411L15	4933433C11Rik	A830007P12Rik		Nefm	8.61108	10.9662	9.76	9.77909		Tbx2	-5.27584	-5.31422	-4.30996	-4.96667
9830166K06Rik	6430598A04Rik	9130221H12Rik	4932411N23Rik	5031434C07Rik	AI317395		Stra6	11.3056	6.86318	11.1547	9.77448		Serpina3f	-4.92307	-5.0515	-4.7989	-4.92449
[truncated: 2,597 more rows]

## Sheet: (C) Pituitary EC
gene	baseMean	log2FoldChange	lfcSE	stat	pvalue	padj
[truncated: 23,329 more rows]

[truncated: 3 more sheets: (D) Liver EC, (E) Cultured brain EC, (F) Concordant genes]
